# Supplementary material
Source: publisher site journal article supplement (https://www.dovepress.com/article/559167)
Supplement: Supplementary file 1 [file 559167_Supplementary%20Materials.docx]

Supplementary Table list

TableS1. Results of a Mendelian randomization analysis of inflammatory factors and osteosarcoma.

TableS2. Results of a heterogeneity analysis of inflammatory factors and osteosarcoma.

TableS3. Results of a pleiotropy analysis of inflammatory factors and osteosarcoma.

TableS4. Results of a steige test of inflammatory factors and osteosarcoma.

TableS5. Results of Mendelian randomization analysis of immune cell characteristics and osteosarcoma.

TableS6. Results of a heterogeneity analysis of immune cell characteristics and osteosarcoma.

TableS7. Results of a pleiotropy analysis of immune cell characteristics and osteosarcoma.

TableS8. Results of a steige test of immune cell characteristics and osteosarcoma.

Supplementary Figure

Figure S1. Immune Checkpoints Associated with CCL5 Expression and Clinical Staging. A. Analysis of immune checkpoints in different CCL5 expression groups. B. Correlation analysis of CCL5 with CD226. C. Correlation of CCL5 expression with clinical stage. *, P < 0.05, **, p < 0.01, ***, p < 0.001.

| ***TableS1. Results of a Mendelian randomization analysis of inflammatory factors and osteosarcoma.*** | | | | | | | | | | | |
| --- | --- | --- | --- | --- | --- | --- | --- | --- | --- | --- | --- |
| outcome | exposure | method | nsnp | b | se | pval | lo_ci | up_ci | or | or_lci95 | or_uci95 |
| Osteosarcoma (controls excluding all cancers) || id:finngen_R11_C3_OSTEOSARCOMA_EXALLC | CTACK levels || id:ebi-a-GCST004420 | Inverse variance weighted | 2 | 0.265748 | 0.543654 | 0.624971 | -0.79981 | 1.33131 | 1.304406 | 0.449412 | 3.785998 |
| Osteosarcoma (controls excluding all cancers) || id:finngen_R11_C3_OSTEOSARCOMA_EXALLC | CTACK levels || id:ebi-a-GCST004420 | Constrained maximum likelihood | 2 | 0.337686 | 0.552553 | 0.541109 | -0.74532 | 1.420689 | 1.4017 | 0.474584 | 4.139971 |
| Osteosarcoma (controls excluding all cancers) || id:finngen_R11_C3_OSTEOSARCOMA_EXALLC | CTACK levels || id:ebi-a-GCST004420 | Debiased inverse-variance weighted method | 2 | 0.268884 | 0.550464 | 0.625219 | -0.81003 | 1.347793 | 1.308503 | 0.444846 | 3.848923 |
| Osteosarcoma (controls excluding all cancers) || id:finngen_R11_C3_OSTEOSARCOMA_EXALLC | beta-nerve growth factor levels || id:ebi-a-GCST004421 | Constrained maximum likelihood | 1 | 0.737451 | 1.080396 | 0.494875 | -1.38012 | 2.855027 | 2.0906 | 0.251547 | 17.3749 |
| Osteosarcoma (controls excluding all cancers) || id:finngen_R11_C3_OSTEOSARCOMA_EXALLC | beta-nerve growth factor levels || id:ebi-a-GCST004421 | Debiased inverse-variance weighted method | 1 | 0.743547 | 1.203036 | 0.536536 | -1.6144 | 3.101497 | 2.103383 | 0.199009 | 22.23121 |
| Osteosarcoma (controls excluding all cancers) || id:finngen_R11_C3_OSTEOSARCOMA_EXALLC | Vascular endothelial growth factor levels || id:ebi-a-GCST004422 | Inverse variance weighted | 3 | 0.07254 | 0.327611 | 0.824764 | -0.56958 | 0.714658 | 1.075236 | 0.565765 | 2.043487 |
| Osteosarcoma (controls excluding all cancers) || id:finngen_R11_C3_OSTEOSARCOMA_EXALLC | Vascular endothelial growth factor levels || id:ebi-a-GCST004422 | MR Egger | 3 | 0.536825 | 0.591772 | 0.53097 | -0.62305 | 1.696697 | 1.710567 | 0.536308 | 5.455899 |
| Osteosarcoma (controls excluding all cancers) || id:finngen_R11_C3_OSTEOSARCOMA_EXALLC | Vascular endothelial growth factor levels || id:ebi-a-GCST004422 | Constrained maximum likelihood | 3 | 0.076374 | 0.314888 | 0.808359 | -0.54081 | 0.693554 | 1.079366 | 0.582279 | 2.000814 |
| Osteosarcoma (controls excluding all cancers) || id:finngen_R11_C3_OSTEOSARCOMA_EXALLC | Vascular endothelial growth factor levels || id:ebi-a-GCST004422 | Debiased inverse-variance weighted method | 3 | 0.072784 | 0.328719 | 0.824768 | -0.57151 | 0.717074 | 1.075498 | 0.564674 | 2.048431 |
| Osteosarcoma (controls excluding all cancers) || id:finngen_R11_C3_OSTEOSARCOMA_EXALLC | TRAIL levels || id:ebi-a-GCST004424 | Inverse variance weighted | 6 | -0.09337 | 0.338161 | 0.782472 | -0.75616 | 0.56943 | 0.91086 | 0.469465 | 1.767259 |
| Osteosarcoma (controls excluding all cancers) || id:finngen_R11_C3_OSTEOSARCOMA_EXALLC | TRAIL levels || id:ebi-a-GCST004424 | MR Egger | 6 | 0.203517 | 1.08612 | 0.860484 | -1.92528 | 2.332313 | 1.225706 | 0.145835 | 10.30174 |
| Osteosarcoma (controls excluding all cancers) || id:finngen_R11_C3_OSTEOSARCOMA_EXALLC | TRAIL levels || id:ebi-a-GCST004424 | Constrained maximum likelihood | 6 | -0.12119 | 0.322081 | 0.706724 | -0.75247 | 0.510093 | 0.885869 | 0.471203 | 1.665446 |
| Osteosarcoma (controls excluding all cancers) || id:finngen_R11_C3_OSTEOSARCOMA_EXALLC | TRAIL levels || id:ebi-a-GCST004424 | Debiased inverse-variance weighted method | 6 | -0.09387 | 0.325254 | 0.77288 | -0.73137 | 0.543627 | 0.9104 | 0.481249 | 1.722241 |
| Osteosarcoma (controls excluding all cancers) || id:finngen_R11_C3_OSTEOSARCOMA_EXALLC | Tumor necrosis factor beta levels || id:ebi-a-GCST004425 | Constrained maximum likelihood | 1 | 0.454718 | 0.591782 | 0.442257 | -0.70518 | 1.614611 | 1.575729 | 0.494022 | 5.025933 |
| Osteosarcoma (controls excluding all cancers) || id:finngen_R11_C3_OSTEOSARCOMA_EXALLC | Tumor necrosis factor beta levels || id:ebi-a-GCST004425 | Debiased inverse-variance weighted method | 1 | 0.464798 | 0.607274 | 0.444042 | -0.72546 | 1.655055 | 1.591693 | 0.484103 | 5.233369 |
| Osteosarcoma (controls excluding all cancers) || id:finngen_R11_C3_OSTEOSARCOMA_EXALLC | Stem cell growth factor beta levels || id:ebi-a-GCST004428 | Inverse variance weighted | 5 | 0.159827 | 0.41903 | 0.70289 | -0.66147 | 0.981125 | 1.173308 | 0.516092 | 2.667456 |
| Osteosarcoma (controls excluding all cancers) || id:finngen_R11_C3_OSTEOSARCOMA_EXALLC | Stem cell growth factor beta levels || id:ebi-a-GCST004428 | MR Egger | 5 | 0.099721 | 0.7611 | 0.90405 | -1.39204 | 1.591478 | 1.104863 | 0.248569 | 4.911003 |
| Osteosarcoma (controls excluding all cancers) || id:finngen_R11_C3_OSTEOSARCOMA_EXALLC | Stem cell growth factor beta levels || id:ebi-a-GCST004428 | Constrained maximum likelihood | 5 | 0.149275 | 0.419202 | 0.72177 | -0.67236 | 0.970911 | 1.160993 | 0.510502 | 2.64035 |
| Osteosarcoma (controls excluding all cancers) || id:finngen_R11_C3_OSTEOSARCOMA_EXALLC | Stem cell growth factor beta levels || id:ebi-a-GCST004428 | Debiased inverse-variance weighted method | 5 | 0.162477 | 0.426083 | 0.702961 | -0.67265 | 0.997601 | 1.176421 | 0.510356 | 2.711768 |
| Osteosarcoma (controls excluding all cancers) || id:finngen_R11_C3_OSTEOSARCOMA_EXALLC | Stem cell factor levels || id:ebi-a-GCST004429 | Inverse variance weighted | 2 | 0.783917 | 1.208283 | 0.516477 | -1.58432 | 3.152152 | 2.190034 | 0.205088 | 23.38634 |
| Osteosarcoma (controls excluding all cancers) || id:finngen_R11_C3_OSTEOSARCOMA_EXALLC | Stem cell factor levels || id:ebi-a-GCST004429 | Constrained maximum likelihood | 2 | 0.62532 | 1.265945 | 0.621338 | -1.85593 | 3.106571 | 1.868844 | 0.156307 | 22.3443 |
| Osteosarcoma (controls excluding all cancers) || id:finngen_R11_C3_OSTEOSARCOMA_EXALLC | Stem cell factor levels || id:ebi-a-GCST004429 | Debiased inverse-variance weighted method | 2 | 0.803846 | 1.242487 | 0.517654 | -1.63143 | 3.23912 | 2.234117 | 0.19565 | 25.51127 |
| Osteosarcoma (controls excluding all cancers) || id:finngen_R11_C3_OSTEOSARCOMA_EXALLC | Interleukin-16 levels || id:ebi-a-GCST004430 | Inverse variance weighted | 3 | 0.041518 | 0.647273 | 0.948857 | -1.22714 | 1.310173 | 1.042392 | 0.29313 | 3.706815 |
| Osteosarcoma (controls excluding all cancers) || id:finngen_R11_C3_OSTEOSARCOMA_EXALLC | Interleukin-16 levels || id:ebi-a-GCST004430 | MR Egger | 3 | -0.61783 | 1.230487 | 0.703764 | -3.02958 | 1.793925 | 0.539114 | 0.048336 | 6.013009 |
| Osteosarcoma (controls excluding all cancers) || id:finngen_R11_C3_OSTEOSARCOMA_EXALLC | Interleukin-16 levels || id:ebi-a-GCST004430 | Constrained maximum likelihood | 3 | 0.068595 | 0.522249 | 0.895502 | -0.95501 | 1.092203 | 1.071002 | 0.384807 | 2.980835 |
| Osteosarcoma (controls excluding all cancers) || id:finngen_R11_C3_OSTEOSARCOMA_EXALLC | Interleukin-16 levels || id:ebi-a-GCST004430 | Debiased inverse-variance weighted method | 3 | 0.042112 | 0.51551 | 0.934893 | -0.96829 | 1.052512 | 1.043012 | 0.379733 | 2.864838 |
| Osteosarcoma (controls excluding all cancers) || id:finngen_R11_C3_OSTEOSARCOMA_EXALLC | RANTES levels || id:ebi-a-GCST004431 | Constrained maximum likelihood | 1 | 2.867977 | 1.074787 | 0.007621 | 0.761394 | 4.974559 | 17.60137 | 2.141259 | 144.6851 |
| Osteosarcoma (controls excluding all cancers) || id:finngen_R11_C3_OSTEOSARCOMA_EXALLC | RANTES levels || id:ebi-a-GCST004431 | Debiased inverse-variance weighted method | 1 | 2.811712 | 1.032834 | 0.006482 | 0.787358 | 4.836066 | 16.63838 | 2.197583 | 125.9728 |
| Osteosarcoma (controls excluding all cancers) || id:finngen_R11_C3_OSTEOSARCOMA_EXALLC | Platelet-derived growth factor BB levels || id:ebi-a-GCST004432 | Inverse variance weighted | 4 | 0.147257 | 0.647715 | 0.820153 | -1.12226 | 1.416778 | 1.158651 | 0.325542 | 4.123814 |
| Osteosarcoma (controls excluding all cancers) || id:finngen_R11_C3_OSTEOSARCOMA_EXALLC | Platelet-derived growth factor BB levels || id:ebi-a-GCST004432 | MR Egger | 4 | -0.93105 | 1.495625 | 0.597121 | -3.86247 | 2.000379 | 0.394141 | 0.021016 | 7.391854 |
| Osteosarcoma (controls excluding all cancers) || id:finngen_R11_C3_OSTEOSARCOMA_EXALLC | Platelet-derived growth factor BB levels || id:ebi-a-GCST004432 | Constrained maximum likelihood | 4 | 0.103405 | 0.522199 | 0.843031 | -0.92011 | 1.126915 | 1.10894 | 0.398477 | 3.086121 |
| Osteosarcoma (controls excluding all cancers) || id:finngen_R11_C3_OSTEOSARCOMA_EXALLC | Platelet-derived growth factor BB levels || id:ebi-a-GCST004432 | Debiased inverse-variance weighted method | 4 | 0.14862 | 0.564863 | 0.792468 | -0.95851 | 1.255752 | 1.160232 | 0.383463 | 3.510477 |
| Osteosarcoma (controls excluding all cancers) || id:finngen_R11_C3_OSTEOSARCOMA_EXALLC | Macrophage inflammatory protein 1b levels || id:ebi-a-GCST004433 | Inverse variance weighted (multiplicative random effects) | 6 | -0.07599 | 0.418845 | 0.856025 | -0.89693 | 0.744943 | 0.926822 | 0.40782 | 2.10632 |
| Osteosarcoma (controls excluding all cancers) || id:finngen_R11_C3_OSTEOSARCOMA_EXALLC | Macrophage inflammatory protein 1b levels || id:ebi-a-GCST004433 | MR Egger | 6 | 1.148812 | 0.50893 | 0.086939 | 0.151308 | 2.146316 | 3.154444 | 1.163355 | 8.553289 |
| Osteosarcoma (controls excluding all cancers) || id:finngen_R11_C3_OSTEOSARCOMA_EXALLC | Macrophage inflammatory protein 1b levels || id:ebi-a-GCST004433 | Constrained maximum likelihood | 6 | -0.06797 | 0.282493 | 0.80985 | -0.62166 | 0.485713 | 0.934285 | 0.537052 | 1.625334 |
| Osteosarcoma (controls excluding all cancers) || id:finngen_R11_C3_OSTEOSARCOMA_EXALLC | Macrophage inflammatory protein 1b levels || id:ebi-a-GCST004433 | Debiased inverse-variance weighted method | 6 | -0.07627 | 0.39942 | 0.848554 | -0.85914 | 0.706589 | 0.926561 | 0.423527 | 2.027065 |
| Osteosarcoma (controls excluding all cancers) || id:finngen_R11_C3_OSTEOSARCOMA_EXALLC | Monokine induced by gamma interferon levels || id:ebi-a-GCST004435 | Constrained maximum likelihood | 1 | -0.26871 | 1.068777 | 0.80149 | -2.36351 | 1.826092 | 0.764365 | 0.094089 | 6.209569 |
| Osteosarcoma (controls excluding all cancers) || id:finngen_R11_C3_OSTEOSARCOMA_EXALLC | Monokine induced by gamma interferon levels || id:ebi-a-GCST004435 | Debiased inverse-variance weighted method | 1 | -0.29022 | 1.175844 | 0.805048 | -2.59488 | 2.014434 | 0.748098 | 0.074655 | 7.49648 |
| Osteosarcoma (controls excluding all cancers) || id:finngen_R11_C3_OSTEOSARCOMA_EXALLC | Macrophage colony stimulating factor levels || id:ebi-a-GCST004436 | Constrained maximum likelihood | 1 | -0.18262 | 0.902543 | 0.839655 | -1.9516 | 1.586368 | 0.833088 | 0.142047 | 4.885973 |
| Osteosarcoma (controls excluding all cancers) || id:finngen_R11_C3_OSTEOSARCOMA_EXALLC | Macrophage colony stimulating factor levels || id:ebi-a-GCST004436 | Debiased inverse-variance weighted method | 1 | -0.19926 | 0.999049 | 0.84191 | -2.1574 | 1.758875 | 0.819336 | 0.115626 | 5.805905 |
| Osteosarcoma (controls excluding all cancers) || id:finngen_R11_C3_OSTEOSARCOMA_EXALLC | Monocyte chemoattractant protein-1 levels || id:ebi-a-GCST004438 | Inverse variance weighted | 4 | 0.670961 | 0.554436 | 0.226215 | -0.41573 | 1.757656 | 1.956116 | 0.659856 | 5.798828 |
| Osteosarcoma (controls excluding all cancers) || id:finngen_R11_C3_OSTEOSARCOMA_EXALLC | Monocyte chemoattractant protein-1 levels || id:ebi-a-GCST004438 | MR Egger | 4 | -0.57876 | 1.500166 | 0.736819 | -3.51908 | 2.361569 | 0.560595 | 0.029627 | 10.60758 |
| Osteosarcoma (controls excluding all cancers) || id:finngen_R11_C3_OSTEOSARCOMA_EXALLC | Monocyte chemoattractant protein-1 levels || id:ebi-a-GCST004438 | Constrained maximum likelihood | 4 | 0.604604 | 0.519942 | 0.244899 | -0.41448 | 1.623692 | 1.830528 | 0.660682 | 5.071779 |
| Osteosarcoma (controls excluding all cancers) || id:finngen_R11_C3_OSTEOSARCOMA_EXALLC | Monocyte chemoattractant protein-1 levels || id:ebi-a-GCST004438 | Debiased inverse-variance weighted method | 4 | 0.678148 | 0.56149 | 0.227138 | -0.42237 | 1.778669 | 1.970225 | 0.655489 | 5.921968 |
| Osteosarcoma (controls excluding all cancers) || id:finngen_R11_C3_OSTEOSARCOMA_EXALLC | Interleukin-12p70 levels || id:ebi-a-GCST004439 | Inverse variance weighted | 3 | -0.03188 | 0.422559 | 0.939861 | -0.86009 | 0.796335 | 0.968623 | 0.423122 | 2.217399 |
| Osteosarcoma (controls excluding all cancers) || id:finngen_R11_C3_OSTEOSARCOMA_EXALLC | Interleukin-12p70 levels || id:ebi-a-GCST004439 | MR Egger | 3 | 0.650193 | 0.75834 | 0.548784 | -0.83615 | 2.136539 | 1.91591 | 0.433374 | 8.470072 |
| Osteosarcoma (controls excluding all cancers) || id:finngen_R11_C3_OSTEOSARCOMA_EXALLC | Interleukin-12p70 levels || id:ebi-a-GCST004439 | Constrained maximum likelihood | 3 | 0.016451 | 0.409368 | 0.967944 | -0.78591 | 0.818813 | 1.016587 | 0.455705 | 2.267806 |
| Osteosarcoma (controls excluding all cancers) || id:finngen_R11_C3_OSTEOSARCOMA_EXALLC | Interleukin-12p70 levels || id:ebi-a-GCST004439 | Debiased inverse-variance weighted method | 3 | -0.03203 | 0.424512 | 0.939861 | -0.86407 | 0.800017 | 0.96848 | 0.421443 | 2.225578 |
| Osteosarcoma (controls excluding all cancers) || id:finngen_R11_C3_OSTEOSARCOMA_EXALLC | Interferon gamma-induced protein 10 levels || id:ebi-a-GCST004440 | Constrained maximum likelihood | 1 | -0.04498 | 1.133146 | 0.968339 | -2.26594 | 2.175991 | 0.956021 | 0.103732 | 8.810913 |
| Osteosarcoma (controls excluding all cancers) || id:finngen_R11_C3_OSTEOSARCOMA_EXALLC | Interferon gamma-induced protein 10 levels || id:ebi-a-GCST004440 | Debiased inverse-variance weighted method | 1 | -0.00741 | 1.11895 | 0.994719 | -2.20055 | 2.185736 | 0.992621 | 0.110742 | 8.897193 |
| Osteosarcoma (controls excluding all cancers) || id:finngen_R11_C3_OSTEOSARCOMA_EXALLC | Interleukin-18 levels || id:ebi-a-GCST004441 | Inverse variance weighted | 4 | -0.01182 | 0.513101 | 0.98162 | -1.0175 | 0.993857 | 0.988249 | 0.361498 | 2.701634 |
| Osteosarcoma (controls excluding all cancers) || id:finngen_R11_C3_OSTEOSARCOMA_EXALLC | Interleukin-18 levels || id:ebi-a-GCST004441 | MR Egger | 4 | -5.17721 | 2.713139 | 0.19659 | -10.495 | 0.140541 | 0.005644 | 2.77E-05 | 1.150897 |
| Osteosarcoma (controls excluding all cancers) || id:finngen_R11_C3_OSTEOSARCOMA_EXALLC | Interleukin-18 levels || id:ebi-a-GCST004441 | Constrained maximum likelihood | 4 | -0.02931 | 0.45597 | 0.948751 | -0.92301 | 0.864393 | 0.971118 | 0.397322 | 2.373565 |
| Osteosarcoma (controls excluding all cancers) || id:finngen_R11_C3_OSTEOSARCOMA_EXALLC | Interleukin-18 levels || id:ebi-a-GCST004441 | Debiased inverse-variance weighted method | 4 | -0.012 | 0.454812 | 0.978942 | -0.90344 | 0.879426 | 0.988067 | 0.405175 | 2.409517 |
| Osteosarcoma (controls excluding all cancers) || id:finngen_R11_C3_OSTEOSARCOMA_EXALLC | Interleukin-17 levels || id:ebi-a-GCST004442 | Constrained maximum likelihood | 1 | 0.29977 | 1.537865 | 0.845451 | -2.71445 | 3.313985 | 1.349548 | 0.066242 | 27.49447 |
| Osteosarcoma (controls excluding all cancers) || id:finngen_R11_C3_OSTEOSARCOMA_EXALLC | Interleukin-17 levels || id:ebi-a-GCST004442 | Debiased inverse-variance weighted method | 1 | 0.287006 | 1.701612 | 0.866058 | -3.04815 | 3.622166 | 1.332432 | 0.047446 | 37.41854 |
| Osteosarcoma (controls excluding all cancers) || id:finngen_R11_C3_OSTEOSARCOMA_EXALLC | Interleukin-13 levels || id:ebi-a-GCST004443 | Constrained maximum likelihood | 1 | 0.12125 | 0.375567 | 0.746813 | -0.61486 | 0.85736 | 1.128907 | 0.540716 | 2.35693 |
| Osteosarcoma (controls excluding all cancers) || id:finngen_R11_C3_OSTEOSARCOMA_EXALLC | Interleukin-13 levels || id:ebi-a-GCST004443 | Debiased inverse-variance weighted method | 1 | 0.115001 | 0.404633 | 0.776248 | -0.67808 | 0.908082 | 1.121875 | 0.507591 | 2.479562 |
| Osteosarcoma (controls excluding all cancers) || id:finngen_R11_C3_OSTEOSARCOMA_EXALLC | Interleukin-10 levels || id:ebi-a-GCST004444 | Inverse variance weighted | 2 | 0.297625 | 0.564599 | 0.598093 | -0.80899 | 1.404238 | 1.346657 | 0.445309 | 4.072423 |
| Osteosarcoma (controls excluding all cancers) || id:finngen_R11_C3_OSTEOSARCOMA_EXALLC | Interleukin-10 levels || id:ebi-a-GCST004444 | Constrained maximum likelihood | 2 | 0.356333 | 0.551859 | 0.518477 | -0.72531 | 1.437977 | 1.428083 | 0.484174 | 4.212168 |
| Osteosarcoma (controls excluding all cancers) || id:finngen_R11_C3_OSTEOSARCOMA_EXALLC | Interleukin-10 levels || id:ebi-a-GCST004444 | Debiased inverse-variance weighted method | 2 | 0.299369 | 0.568145 | 0.598247 | -0.8142 | 1.412934 | 1.349007 | 0.442996 | 4.107989 |
| Osteosarcoma (controls excluding all cancers) || id:finngen_R11_C3_OSTEOSARCOMA_EXALLC | Hepatocyte growth factor levels || id:ebi-a-GCST004449 | Inverse variance weighted | 2 | -0.19722 | 1.07171 | 0.853993 | -2.29777 | 1.903329 | 0.821008 | 0.100482 | 6.70819 |
| Osteosarcoma (controls excluding all cancers) || id:finngen_R11_C3_OSTEOSARCOMA_EXALLC | Hepatocyte growth factor levels || id:ebi-a-GCST004449 | Constrained maximum likelihood | 2 | -0.21007 | 1.115057 | 0.850566 | -2.39558 | 1.975438 | 0.810525 | 0.091119 | 7.209779 |
| Osteosarcoma (controls excluding all cancers) || id:finngen_R11_C3_OSTEOSARCOMA_EXALLC | Hepatocyte growth factor levels || id:ebi-a-GCST004449 | Debiased inverse-variance weighted method | 2 | -0.20128 | 1.09397 | 0.85402 | -2.34546 | 1.942899 | 0.817682 | 0.095803 | 6.978955 |
| Osteosarcoma (controls excluding all cancers) || id:finngen_R11_C3_OSTEOSARCOMA_EXALLC | Interleukin-7 levels || id:ebi-a-GCST004451 | Constrained maximum likelihood | 1 | 0.149266 | 0.489366 | 0.760351 | -0.80989 | 1.108424 | 1.160982 | 0.444906 | 3.02958 |
| Osteosarcoma (controls excluding all cancers) || id:finngen_R11_C3_OSTEOSARCOMA_EXALLC | Interleukin-7 levels || id:ebi-a-GCST004451 | Debiased inverse-variance weighted method | 1 | 0.142009 | 0.529918 | 0.788712 | -0.89663 | 1.180648 | 1.152587 | 0.407942 | 3.256484 |
| Osteosarcoma (controls excluding all cancers) || id:finngen_R11_C3_OSTEOSARCOMA_EXALLC | Interleukin-5 levels || id:ebi-a-GCST004452 | Constrained maximum likelihood | 1 | 0.353638 | 1.040901 | 0.734051 | -1.68653 | 2.393803 | 1.424239 | 0.185161 | 10.95508 |
| Osteosarcoma (controls excluding all cancers) || id:finngen_R11_C3_OSTEOSARCOMA_EXALLC | Interleukin-5 levels || id:ebi-a-GCST004452 | Debiased inverse-variance weighted method | 1 | 0.349268 | 1.154022 | 0.762154 | -1.91262 | 2.611152 | 1.418029 | 0.147694 | 13.61473 |
| Osteosarcoma (controls excluding all cancers) || id:finngen_R11_C3_OSTEOSARCOMA_EXALLC | Interleukin-2 receptor antagonist levels || id:ebi-a-GCST004454 | Constrained maximum likelihood | 1 | 0.330391 | 0.530213 | 0.533201 | -0.70883 | 1.369609 | 1.391511 | 0.492221 | 3.933811 |
| Osteosarcoma (controls excluding all cancers) || id:finngen_R11_C3_OSTEOSARCOMA_EXALLC | Interleukin-2 receptor antagonist levels || id:ebi-a-GCST004454 | Debiased inverse-variance weighted method | 1 | 0.341339 | 0.550007 | 0.534857 | -0.73667 | 1.419352 | 1.40683 | 0.478703 | 4.134441 |
| Osteosarcoma (controls excluding all cancers) || id:finngen_R11_C3_OSTEOSARCOMA_EXALLC | Growth-regulated protein alpha levels || id:ebi-a-GCST004457 | Inverse variance weighted | 2 | 0.250085 | 0.342691 | 0.465532 | -0.42159 | 0.921758 | 1.284134 | 0.656004 | 2.513706 |
| Osteosarcoma (controls excluding all cancers) || id:finngen_R11_C3_OSTEOSARCOMA_EXALLC | Growth-regulated protein alpha levels || id:ebi-a-GCST004457 | Constrained maximum likelihood | 2 | 0.202915 | 0.343759 | 0.555 | -0.47085 | 0.876684 | 1.224969 | 0.62447 | 2.402917 |
| Osteosarcoma (controls excluding all cancers) || id:finngen_R11_C3_OSTEOSARCOMA_EXALLC | Growth-regulated protein alpha levels || id:ebi-a-GCST004457 | Debiased inverse-variance weighted method | 2 | 0.251243 | 0.344491 | 0.465809 | -0.42396 | 0.926445 | 1.285622 | 0.65445 | 2.525516 |
| Osteosarcoma (controls excluding all cancers) || id:finngen_R11_C3_OSTEOSARCOMA_EXALLC | Eotaxin levels || id:ebi-a-GCST004460 | Inverse variance weighted | 4 | 1.045753 | 0.692363 | 0.130939 | -0.31128 | 2.402784 | 2.845539 | 0.73251 | 11.05391 |
| Osteosarcoma (controls excluding all cancers) || id:finngen_R11_C3_OSTEOSARCOMA_EXALLC | Eotaxin levels || id:ebi-a-GCST004460 | MR Egger | 4 | 2.605111 | 1.719596 | 0.269006 | -0.7653 | 5.975519 | 13.53272 | 0.465195 | 393.6725 |
| Osteosarcoma (controls excluding all cancers) || id:finngen_R11_C3_OSTEOSARCOMA_EXALLC | Eotaxin levels || id:ebi-a-GCST004460 | Constrained maximum likelihood | 4 | 1.010277 | 0.58911 | 0.08636 | -0.14438 | 2.164933 | 2.746361 | 0.865559 | 8.714016 |
| Osteosarcoma (controls excluding all cancers) || id:finngen_R11_C3_OSTEOSARCOMA_EXALLC | Eotaxin levels || id:ebi-a-GCST004460 | Debiased inverse-variance weighted method | 4 | 1.056817 | 0.608623 | 0.082492 | -0.13608 | 2.249717 | 2.877198 | 0.87277 | 9.48505 |

| ***TableS2. Results of a heterogeneity analysis of inflammatory factors and osteosarcoma.*** | | | | | | | |
| --- | --- | --- | --- | --- | --- | --- | --- |
| id.exposure | id.outcome | outcome | exposure | method | Q | Q_df | Q_pval |
| ebi-a-GCST004420 | finngen_R11_C3_OSTEOSARCOMA_EXALLC | Osteosarcoma (controls excluding all cancers) || id:finngen_R11_C3_OSTEOSARCOMA_EXALLC | CTACK levels || id:ebi-a-GCST004420 | Inverse variance weighted | 0.418883 | 1 | 0.517495 |
| ebi-a-GCST004422 | finngen_R11_C3_OSTEOSARCOMA_EXALLC | Osteosarcoma (controls excluding all cancers) || id:finngen_R11_C3_OSTEOSARCOMA_EXALLC | Vascular endothelial growth factor levels || id:ebi-a-GCST004422 | MR Egger | 0.392092 | 1 | 0.531202 |
| ebi-a-GCST004422 | finngen_R11_C3_OSTEOSARCOMA_EXALLC | Osteosarcoma (controls excluding all cancers) || id:finngen_R11_C3_OSTEOSARCOMA_EXALLC | Vascular endothelial growth factor levels || id:ebi-a-GCST004422 | Inverse variance weighted | 1.279665 | 2 | 0.527381 |
| ebi-a-GCST004424 | finngen_R11_C3_OSTEOSARCOMA_EXALLC | Osteosarcoma (controls excluding all cancers) || id:finngen_R11_C3_OSTEOSARCOMA_EXALLC | TRAIL levels || id:ebi-a-GCST004424 | MR Egger | 5.350473 | 4 | 0.253189 |
| ebi-a-GCST004424 | finngen_R11_C3_OSTEOSARCOMA_EXALLC | Osteosarcoma (controls excluding all cancers) || id:finngen_R11_C3_OSTEOSARCOMA_EXALLC | TRAIL levels || id:ebi-a-GCST004424 | Inverse variance weighted | 5.46387 | 5 | 0.361924 |
| ebi-a-GCST004428 | finngen_R11_C3_OSTEOSARCOMA_EXALLC | Osteosarcoma (controls excluding all cancers) || id:finngen_R11_C3_OSTEOSARCOMA_EXALLC | Stem cell growth factor beta levels || id:ebi-a-GCST004428 | MR Egger | 0.404981 | 3 | 0.939212 |
| ebi-a-GCST004428 | finngen_R11_C3_OSTEOSARCOMA_EXALLC | Osteosarcoma (controls excluding all cancers) || id:finngen_R11_C3_OSTEOSARCOMA_EXALLC | Stem cell growth factor beta levels || id:ebi-a-GCST004428 | Inverse variance weighted | 0.41393 | 4 | 0.981321 |
| ebi-a-GCST004429 | finngen_R11_C3_OSTEOSARCOMA_EXALLC | Osteosarcoma (controls excluding all cancers) || id:finngen_R11_C3_OSTEOSARCOMA_EXALLC | Stem cell factor levels || id:ebi-a-GCST004429 | Inverse variance weighted | 0.199926 | 1 | 0.65478 |
| ebi-a-GCST004430 | finngen_R11_C3_OSTEOSARCOMA_EXALLC | Osteosarcoma (controls excluding all cancers) || id:finngen_R11_C3_OSTEOSARCOMA_EXALLC | Interleukin-16 levels || id:ebi-a-GCST004430 | MR Egger | 2.563161 | 1 | 0.10938 |
| ebi-a-GCST004430 | finngen_R11_C3_OSTEOSARCOMA_EXALLC | Osteosarcoma (controls excluding all cancers) || id:finngen_R11_C3_OSTEOSARCOMA_EXALLC | Interleukin-16 levels || id:ebi-a-GCST004430 | Inverse variance weighted | 3.747373 | 2 | 0.153557 |
| ebi-a-GCST004432 | finngen_R11_C3_OSTEOSARCOMA_EXALLC | Osteosarcoma (controls excluding all cancers) || id:finngen_R11_C3_OSTEOSARCOMA_EXALLC | Platelet-derived growth factor BB levels || id:ebi-a-GCST004432 | MR Egger | 3.673654 | 2 | 0.159322 |
| ebi-a-GCST004432 | finngen_R11_C3_OSTEOSARCOMA_EXALLC | Osteosarcoma (controls excluding all cancers) || id:finngen_R11_C3_OSTEOSARCOMA_EXALLC | Platelet-derived growth factor BB levels || id:ebi-a-GCST004432 | Inverse variance weighted | 4.884664 | 3 | 0.18044 |
| ebi-a-GCST004433 | finngen_R11_C3_OSTEOSARCOMA_EXALLC | Osteosarcoma (controls excluding all cancers) || id:finngen_R11_C3_OSTEOSARCOMA_EXALLC | Macrophage inflammatory protein 1b levels || id:ebi-a-GCST004433 | MR Egger | 4.419072 | 4 | 0.352252 |
| ebi-a-GCST004433 | finngen_R11_C3_OSTEOSARCOMA_EXALLC | Osteosarcoma (controls excluding all cancers) || id:finngen_R11_C3_OSTEOSARCOMA_EXALLC | Macrophage inflammatory protein 1b levels || id:ebi-a-GCST004433 | Inverse variance weighted | 13.31764 | 5 | 0.020577 |
| ebi-a-GCST004438 | finngen_R11_C3_OSTEOSARCOMA_EXALLC | Osteosarcoma (controls excluding all cancers) || id:finngen_R11_C3_OSTEOSARCOMA_EXALLC | Monocyte chemoattractant protein-1 levels || id:ebi-a-GCST004438 | MR Egger | 1.202015 | 2 | 0.548259 |
| ebi-a-GCST004438 | finngen_R11_C3_OSTEOSARCOMA_EXALLC | Osteosarcoma (controls excluding all cancers) || id:finngen_R11_C3_OSTEOSARCOMA_EXALLC | Monocyte chemoattractant protein-1 levels || id:ebi-a-GCST004438 | Inverse variance weighted | 2.005779 | 3 | 0.571208 |
| ebi-a-GCST004439 | finngen_R11_C3_OSTEOSARCOMA_EXALLC | Osteosarcoma (controls excluding all cancers) || id:finngen_R11_C3_OSTEOSARCOMA_EXALLC | Interleukin-12p70 levels || id:ebi-a-GCST004439 | MR Egger | 0.166268 | 1 | 0.683451 |
| ebi-a-GCST004439 | finngen_R11_C3_OSTEOSARCOMA_EXALLC | Osteosarcoma (controls excluding all cancers) || id:finngen_R11_C3_OSTEOSARCOMA_EXALLC | Interleukin-12p70 levels || id:ebi-a-GCST004439 | Inverse variance weighted | 1.339522 | 2 | 0.511831 |
| ebi-a-GCST004441 | finngen_R11_C3_OSTEOSARCOMA_EXALLC | Osteosarcoma (controls excluding all cancers) || id:finngen_R11_C3_OSTEOSARCOMA_EXALLC | Interleukin-18 levels || id:ebi-a-GCST004441 | MR Egger | 0.57757 | 2 | 0.749173 |
| ebi-a-GCST004441 | finngen_R11_C3_OSTEOSARCOMA_EXALLC | Osteosarcoma (controls excluding all cancers) || id:finngen_R11_C3_OSTEOSARCOMA_EXALLC | Interleukin-18 levels || id:ebi-a-GCST004441 | Inverse variance weighted | 4.295055 | 3 | 0.231316 |
| ebi-a-GCST004444 | finngen_R11_C3_OSTEOSARCOMA_EXALLC | Osteosarcoma (controls excluding all cancers) || id:finngen_R11_C3_OSTEOSARCOMA_EXALLC | Interleukin-10 levels || id:ebi-a-GCST004444 | Inverse variance weighted | 0.328188 | 1 | 0.566728 |
| ebi-a-GCST004449 | finngen_R11_C3_OSTEOSARCOMA_EXALLC | Osteosarcoma (controls excluding all cancers) || id:finngen_R11_C3_OSTEOSARCOMA_EXALLC | Hepatocyte growth factor levels || id:ebi-a-GCST004449 | Inverse variance weighted | 0.752513 | 1 | 0.385682 |
| ebi-a-GCST004457 | finngen_R11_C3_OSTEOSARCOMA_EXALLC | Osteosarcoma (controls excluding all cancers) || id:finngen_R11_C3_OSTEOSARCOMA_EXALLC | Growth-regulated protein alpha levels || id:ebi-a-GCST004457 | Inverse variance weighted | 0.93752 | 1 | 0.332916 |
| ebi-a-GCST004460 | finngen_R11_C3_OSTEOSARCOMA_EXALLC | Osteosarcoma (controls excluding all cancers) || id:finngen_R11_C3_OSTEOSARCOMA_EXALLC | Eotaxin levels || id:ebi-a-GCST004460 | MR Egger | 3.134881 | 2 | 0.208578 |
| ebi-a-GCST004460 | finngen_R11_C3_OSTEOSARCOMA_EXALLC | Osteosarcoma (controls excluding all cancers) || id:finngen_R11_C3_OSTEOSARCOMA_EXALLC | Eotaxin levels || id:ebi-a-GCST004460 | Inverse variance weighted | 4.674936 | 3 | 0.197207 |

| ***TableS3. Results of a pleiotropy analysis of inflammatory factors and osteosarcoma.*** | | | | | | | |
| --- | --- | --- | --- | --- | --- | --- | --- |
| id.exposure | id.outcome | outcome | exposure | egger_intercept | | se | pval |
| ebi-a-GCST004420 | finngen_R11_C3_OSTEOSARCOMA_EXALLC | Osteosarcoma (controls excluding all cancers) || id:finngen_R11_C3_OSTEOSARCOMA_EXALLC | CTACK levels || id:ebi-a-GCST004420 | | | | |
| ebi-a-GCST004422 | finngen_R11_C3_OSTEOSARCOMA_EXALLC | Osteosarcoma (controls excluding all cancers) || id:finngen_R11_C3_OSTEOSARCOMA_EXALLC | Vascular endothelial growth factor levels || id:ebi-a-GCST004422 | -0.17456 | 0.185287 | | 0.51897 |
| ebi-a-GCST004424 | finngen_R11_C3_OSTEOSARCOMA_EXALLC | Osteosarcoma (controls excluding all cancers) || id:finngen_R11_C3_OSTEOSARCOMA_EXALLC | TRAIL levels || id:ebi-a-GCST004424 | -0.23497 | 0.807024 | | 0.785402 |
| ebi-a-GCST004428 | finngen_R11_C3_OSTEOSARCOMA_EXALLC | Osteosarcoma (controls excluding all cancers) || id:finngen_R11_C3_OSTEOSARCOMA_EXALLC | Stem cell growth factor beta levels || id:ebi-a-GCST004428 | 0.020429 | 0.215948 | | 0.930597 |
| ebi-a-GCST004429 | finngen_R11_C3_OSTEOSARCOMA_EXALLC | Osteosarcoma (controls excluding all cancers) || id:finngen_R11_C3_OSTEOSARCOMA_EXALLC | Stem cell factor levels || id:ebi-a-GCST004429 | | | | |
| ebi-a-GCST004430 | finngen_R11_C3_OSTEOSARCOMA_EXALLC | Osteosarcoma (controls excluding all cancers) || id:finngen_R11_C3_OSTEOSARCOMA_EXALLC | Interleukin-16 levels || id:ebi-a-GCST004430 | 0.224474 | 0.330247 | | 0.61995 |
| ebi-a-GCST004432 | finngen_R11_C3_OSTEOSARCOMA_EXALLC | Osteosarcoma (controls excluding all cancers) || id:finngen_R11_C3_OSTEOSARCOMA_EXALLC | Platelet-derived growth factor BB levels || id:ebi-a-GCST004432 | 0.246438 | 0.303506 | | 0.502084 |
| ebi-a-GCST004433 | finngen_R11_C3_OSTEOSARCOMA_EXALLC | Osteosarcoma (controls excluding all cancers) || id:finngen_R11_C3_OSTEOSARCOMA_EXALLC | Macrophage inflammatory protein 1b levels || id:ebi-a-GCST004433 | -0.61529 | 0.216797 | | 0.046959 |
| ebi-a-GCST004438 | finngen_R11_C3_OSTEOSARCOMA_EXALLC | Osteosarcoma (controls excluding all cancers) || id:finngen_R11_C3_OSTEOSARCOMA_EXALLC | Monocyte chemoattractant protein-1 levels || id:ebi-a-GCST004438 | 0.232985 | 0.259875 | | 0.464581 |
| ebi-a-GCST004439 | finngen_R11_C3_OSTEOSARCOMA_EXALLC | Osteosarcoma (controls excluding all cancers) || id:finngen_R11_C3_OSTEOSARCOMA_EXALLC | Interleukin-12p70 levels || id:ebi-a-GCST004439 | -0.19299 | 0.178169 | | 0.474597 |
| ebi-a-GCST004441 | finngen_R11_C3_OSTEOSARCOMA_EXALLC | Osteosarcoma (controls excluding all cancers) || id:finngen_R11_C3_OSTEOSARCOMA_EXALLC | Interleukin-18 levels || id:ebi-a-GCST004441 | 1.43894 | 0.746308 | | 0.193653 |
| ebi-a-GCST004444 | finngen_R11_C3_OSTEOSARCOMA_EXALLC | Osteosarcoma (controls excluding all cancers) || id:finngen_R11_C3_OSTEOSARCOMA_EXALLC | Interleukin-10 levels || id:ebi-a-GCST004444 | | | | |
| ebi-a-GCST004449 | finngen_R11_C3_OSTEOSARCOMA_EXALLC | Osteosarcoma (controls excluding all cancers) || id:finngen_R11_C3_OSTEOSARCOMA_EXALLC | Hepatocyte growth factor levels || id:ebi-a-GCST004449 | | | | |
| ebi-a-GCST004457 | finngen_R11_C3_OSTEOSARCOMA_EXALLC | Osteosarcoma (controls excluding all cancers) || id:finngen_R11_C3_OSTEOSARCOMA_EXALLC | Growth-regulated protein alpha levels || id:ebi-a-GCST004457 | | | | |
| ebi-a-GCST004460 | finngen_R11_C3_OSTEOSARCOMA_EXALLC | Osteosarcoma (controls excluding all cancers) || id:finngen_R11_C3_OSTEOSARCOMA_EXALLC | Eotaxin levels || id:ebi-a-GCST004460 | -0.38136 | 0.384734 | | 0.426042 |

| ***TableS4. Results of a steige test of inflammatory factors and osteosarcoma.*** | | |
| --- | --- | --- |
| id.exposure | id.outcome | steiger_test_pval | | steiger_test_direction | |
| ebi-a-GCST004420 | finngen_R11_C3_OSTEOSARCOMA_EXALLC | 1.82E-38 | | TRUE |
| ebi-a-GCST004421 | finngen_R11_C3_OSTEOSARCOMA_EXALLC | 2.89E-09 | | TRUE |
| ebi-a-GCST004422 | finngen_R11_C3_OSTEOSARCOMA_EXALLC | 1.60E-185 | | TRUE |
| ebi-a-GCST004424 | finngen_R11_C3_OSTEOSARCOMA_EXALLC | 1.35E-244 | | TRUE |
| ebi-a-GCST004425 | finngen_R11_C3_OSTEOSARCOMA_EXALLC | 1.45E-18 | | TRUE |
| ebi-a-GCST004428 | finngen_R11_C3_OSTEOSARCOMA_EXALLC | 1.57E-70 | | TRUE |
| ebi-a-GCST004429 | finngen_R11_C3_OSTEOSARCOMA_EXALLC | 2.12E-18 | | TRUE |
| ebi-a-GCST004430 | finngen_R11_C3_OSTEOSARCOMA_EXALLC | 4.87E-45 | | TRUE |
| ebi-a-GCST004431 | finngen_R11_C3_OSTEOSARCOMA_EXALLC | 2.99E-07 | | TRUE |
| ebi-a-GCST004432 | finngen_R11_C3_OSTEOSARCOMA_EXALLC | 2.19E-87 | | TRUE |
| ebi-a-GCST004433 | finngen_R11_C3_OSTEOSARCOMA_EXALLC | 0 | | TRUE |
| ebi-a-GCST004435 | finngen_R11_C3_OSTEOSARCOMA_EXALLC | 1.22E-10 | | TRUE |
| ebi-a-GCST004436 | finngen_R11_C3_OSTEOSARCOMA_EXALLC | 2.54E-08 | | TRUE |
| ebi-a-GCST004438 | finngen_R11_C3_OSTEOSARCOMA_EXALLC | 1.42E-81 | | TRUE |
| ebi-a-GCST004439 | finngen_R11_C3_OSTEOSARCOMA_EXALLC | 5.03E-136 | | TRUE |
| ebi-a-GCST004440 | finngen_R11_C3_OSTEOSARCOMA_EXALLC | 3.04E-08 | | TRUE |
| ebi-a-GCST004441 | finngen_R11_C3_OSTEOSARCOMA_EXALLC | 1.73E-59 | | TRUE |
| ebi-a-GCST004442 | finngen_R11_C3_OSTEOSARCOMA_EXALLC | 8.09E-10 | | TRUE |
| ebi-a-GCST004443 | finngen_R11_C3_OSTEOSARCOMA_EXALLC | 4.12E-63 | | TRUE |
| ebi-a-GCST004444 | finngen_R11_C3_OSTEOSARCOMA_EXALLC | 3.05E-72 | | TRUE |
| ebi-a-GCST004449 | finngen_R11_C3_OSTEOSARCOMA_EXALLC | 4.51E-22 | | TRUE |
| ebi-a-GCST004451 | finngen_R11_C3_OSTEOSARCOMA_EXALLC | 1.05E-37 | | TRUE |
| ebi-a-GCST004452 | finngen_R11_C3_OSTEOSARCOMA_EXALLC | 1.15E-09 | | TRUE |
| ebi-a-GCST004454 | finngen_R11_C3_OSTEOSARCOMA_EXALLC | 4.78E-37 | | TRUE |
| ebi-a-GCST004457 | finngen_R11_C3_OSTEOSARCOMA_EXALLC | 1.93E-96 | | TRUE |
| ebi-a-GCST004460 | finngen_R11_C3_OSTEOSARCOMA_EXALLC | 8.12E-81 | | TRUE |

| ***TableS5. Results of Mendelian randomization analysis of immune cell characteristics and osteosarcoma.*** | | | | | | | | | | | | | |
| --- | --- | --- | --- | --- | --- | --- | --- | --- | --- | --- | --- | --- | --- |
| id.exposure | id.outcome | outcome | exposure | method | nsnp | b | se | pval | lo_ci | up_ci | or | or_lci95 | or_uci95 |
| ebi-a-GCST90001392 | finngen_R11_C3_OSTEOSARCOMA_EXALLC | Osteosarcoma (controls excluding all cancers) || id:finngen_R11_C3_OSTEOSARCOMA_EXALLC | IgD+ CD38+ B cell Absolute Count || id:ebi-a-GCST90001392 | Inverse variance weighted | 2 | 0.210446 | 1.362363 | 0.877238 | -2.45979 | 2.880678 | 1.234228 | 0.085453 | 17.82635 |
| ebi-a-GCST90001395 | finngen_R11_C3_OSTEOSARCOMA_EXALLC | Osteosarcoma (controls excluding all cancers) || id:finngen_R11_C3_OSTEOSARCOMA_EXALLC | IgD+ CD38- B cell %B cell || id:ebi-a-GCST90001395 | Inverse variance weighted | 2 | -0.46642 | 1.163084 | 0.688408 | -2.74606 | 1.813228 | 0.627246 | 0.06418 | 6.130205 |
| ebi-a-GCST90001398 | finngen_R11_C3_OSTEOSARCOMA_EXALLC | Osteosarcoma (controls excluding all cancers) || id:finngen_R11_C3_OSTEOSARCOMA_EXALLC | Unswitched memory B cell Absolute Count || id:ebi-a-GCST90001398 | Inverse variance weighted | 2 | 0.677187 | 1.250219 | 0.588056 | -1.77324 | 3.127616 | 1.968333 | 0.169782 | 22.8195 |
| ebi-a-GCST90001399 | finngen_R11_C3_OSTEOSARCOMA_EXALLC | Osteosarcoma (controls excluding all cancers) || id:finngen_R11_C3_OSTEOSARCOMA_EXALLC | IgD- CD27- B cell %B cell || id:ebi-a-GCST90001399 | Inverse variance weighted | 3 | -0.12816 | 0.446181 | 0.773929 | -1.00268 | 0.746354 | 0.879712 | 0.366896 | 2.109296 |
| ebi-a-GCST90001401 | finngen_R11_C3_OSTEOSARCOMA_EXALLC | Osteosarcoma (controls excluding all cancers) || id:finngen_R11_C3_OSTEOSARCOMA_EXALLC | IgD- CD27- B cell Absolute Count || id:ebi-a-GCST90001401 | Inverse variance weighted | 2 | -0.08207 | 0.588114 | 0.889024 | -1.23477 | 1.070638 | 0.921212 | 0.290902 | 2.917239 |
| ebi-a-GCST90001406 | finngen_R11_C3_OSTEOSARCOMA_EXALLC | Osteosarcoma (controls excluding all cancers) || id:finngen_R11_C3_OSTEOSARCOMA_EXALLC | Memory B cell %B cell || id:ebi-a-GCST90001406 | Inverse variance weighted | 2 | -0.60334 | 1.234323 | 0.624983 | -3.02261 | 1.815936 | 0.546983 | 0.048674 | 6.146825 |
| ebi-a-GCST90001417 | finngen_R11_C3_OSTEOSARCOMA_EXALLC | Osteosarcoma (controls excluding all cancers) || id:finngen_R11_C3_OSTEOSARCOMA_EXALLC | CD24+ CD27+ B cell %B cell || id:ebi-a-GCST90001417 | Inverse variance weighted | 3 | -0.61247 | 0.546375 | 0.262302 | -1.68336 | 0.458426 | 0.542011 | 0.185748 | 1.581583 |
| ebi-a-GCST90001424 | finngen_R11_C3_OSTEOSARCOMA_EXALLC | Osteosarcoma (controls excluding all cancers) || id:finngen_R11_C3_OSTEOSARCOMA_EXALLC | IgD+ B cell %Lymphocyte || id:ebi-a-GCST90001424 | Inverse variance weighted | 2 | 1.687782 | 1.077554 | 0.117276 | -0.42422 | 3.799788 | 5.407476 | 0.654278 | 44.69172 |
| ebi-a-GCST90001426 | finngen_R11_C3_OSTEOSARCOMA_EXALLC | Osteosarcoma (controls excluding all cancers) || id:finngen_R11_C3_OSTEOSARCOMA_EXALLC | IgD- CD38dim B cell %lymphocyte || id:ebi-a-GCST90001426 | Inverse variance weighted | 2 | -1.25939 | 0.930548 | 0.175932 | -3.08326 | 0.564482 | 0.283827 | 0.045809 | 1.758537 |
| ebi-a-GCST90001431 | finngen_R11_C3_OSTEOSARCOMA_EXALLC | Osteosarcoma (controls excluding all cancers) || id:finngen_R11_C3_OSTEOSARCOMA_EXALLC | IgD+ CD38- B cell %lymphocyte || id:ebi-a-GCST90001431 | Inverse variance weighted | 2 | -1.14022 | 2.022118 | 0.572839 | -5.10357 | 2.823129 | 0.319748 | 0.006075 | 16.82942 |
| ebi-a-GCST90001432 | finngen_R11_C3_OSTEOSARCOMA_EXALLC | Osteosarcoma (controls excluding all cancers) || id:finngen_R11_C3_OSTEOSARCOMA_EXALLC | Unswitched memory B cell %lymphocyte || id:ebi-a-GCST90001432 | Inverse variance weighted | 4 | 0.114023 | 0.808219 | 0.887808 | -1.47009 | 1.698133 | 1.120777 | 0.229905 | 5.463735 |
| ebi-a-GCST90001433 | finngen_R11_C3_OSTEOSARCOMA_EXALLC | Osteosarcoma (controls excluding all cancers) || id:finngen_R11_C3_OSTEOSARCOMA_EXALLC | IgD- CD27- B cell %lymphocyte || id:ebi-a-GCST90001433 | Inverse variance weighted | 2 | -0.07183 | 0.590071 | 0.903115 | -1.22837 | 1.084711 | 0.930691 | 0.29277 | 2.958584 |
| ebi-a-GCST90001434 | finngen_R11_C3_OSTEOSARCOMA_EXALLC | Osteosarcoma (controls excluding all cancers) || id:finngen_R11_C3_OSTEOSARCOMA_EXALLC | Switched memory B cell %lymphocyte || id:ebi-a-GCST90001434 | Inverse variance weighted | 3 | 1.057777 | 0.921638 | 0.251087 | -0.74863 | 2.864188 | 2.879962 | 0.473012 | 17.53482 |
| ebi-a-GCST90001436 | finngen_R11_C3_OSTEOSARCOMA_EXALLC | Osteosarcoma (controls excluding all cancers) || id:finngen_R11_C3_OSTEOSARCOMA_EXALLC | Memory B cell %lymphocyte || id:ebi-a-GCST90001436 | Inverse variance weighted | 2 | 2.051535 | 1.092205 | 0.060334 | -0.08919 | 4.192256 | 7.779834 | 0.914675 | 66.17191 |
| ebi-a-GCST90001439 | finngen_R11_C3_OSTEOSARCOMA_EXALLC | Osteosarcoma (controls excluding all cancers) || id:finngen_R11_C3_OSTEOSARCOMA_EXALLC | IgD+ CD24+ B cell %lymphocyte || id:ebi-a-GCST90001439 | Inverse variance weighted | 2 | 1.593474 | 1.040007 | 0.125479 | -0.44494 | 3.631888 | 4.920815 | 0.640863 | 37.78409 |
| ebi-a-GCST90001442 | finngen_R11_C3_OSTEOSARCOMA_EXALLC | Osteosarcoma (controls excluding all cancers) || id:finngen_R11_C3_OSTEOSARCOMA_EXALLC | CD24+ CD27+ B cell %lymphocyte || id:ebi-a-GCST90001442 | Inverse variance weighted | 3 | 1.380425 | 0.855037 | 0.106427 | -0.29545 | 3.056298 | 3.97659 | 0.744198 | 21.24875 |
| ebi-a-GCST90001450 | finngen_R11_C3_OSTEOSARCOMA_EXALLC | Osteosarcoma (controls excluding all cancers) || id:finngen_R11_C3_OSTEOSARCOMA_EXALLC | CD62L- monocyte Absolute Count || id:ebi-a-GCST90001450 | Inverse variance weighted | 3 | -0.37069 | 0.635151 | 0.559477 | -1.61558 | 0.874211 | 0.690261 | 0.198775 | 2.396983 |
| ebi-a-GCST90001451 | finngen_R11_C3_OSTEOSARCOMA_EXALLC | Osteosarcoma (controls excluding all cancers) || id:finngen_R11_C3_OSTEOSARCOMA_EXALLC | CD62L- monocyte %monocyte || id:ebi-a-GCST90001451 | Inverse variance weighted | 4 | -0.26201 | 0.44577 | 0.55668 | -1.13572 | 0.611694 | 0.7695 | 0.32119 | 1.843552 |
| ebi-a-GCST90001458 | finngen_R11_C3_OSTEOSARCOMA_EXALLC | Osteosarcoma (controls excluding all cancers) || id:finngen_R11_C3_OSTEOSARCOMA_EXALLC | Myeloid Dendritic Cell Absolute Count || id:ebi-a-GCST90001458 | Inverse variance weighted | 3 | 0.120183 | 0.37891 | 0.751107 | -0.62248 | 0.862847 | 1.127703 | 0.536611 | 2.369898 |
| ebi-a-GCST90001459 | finngen_R11_C3_OSTEOSARCOMA_EXALLC | Osteosarcoma (controls excluding all cancers) || id:finngen_R11_C3_OSTEOSARCOMA_EXALLC | Myeloid Dendritic Cell %Dendritic Cell || id:ebi-a-GCST90001459 | Inverse variance weighted | 2 | 0.148501 | 0.416145 | 0.721205 | -0.66714 | 0.964146 | 1.160094 | 0.513172 | 2.622547 |
| ebi-a-GCST90001460 | finngen_R11_C3_OSTEOSARCOMA_EXALLC | Osteosarcoma (controls excluding all cancers) || id:finngen_R11_C3_OSTEOSARCOMA_EXALLC | Plasmacytoid Dendritic Cell Absolute Count || id:ebi-a-GCST90001460 | Inverse variance weighted | 2 | -0.88922 | 0.743145 | 0.231476 | -2.34578 | 0.567343 | 0.410976 | 0.095772 | 1.763575 |
| ebi-a-GCST90001461 | finngen_R11_C3_OSTEOSARCOMA_EXALLC | Osteosarcoma (controls excluding all cancers) || id:finngen_R11_C3_OSTEOSARCOMA_EXALLC | Dendritic Cell Absolute Count || id:ebi-a-GCST90001461 | Inverse variance weighted | 3 | 0.067852 | 0.425204 | 0.873217 | -0.76555 | 0.901252 | 1.070206 | 0.465079 | 2.462685 |
| ebi-a-GCST90001462 | finngen_R11_C3_OSTEOSARCOMA_EXALLC | Osteosarcoma (controls excluding all cancers) || id:finngen_R11_C3_OSTEOSARCOMA_EXALLC | CD62L- Dendritic Cell Absolute Count || id:ebi-a-GCST90001462 | Inverse variance weighted | 5 | 0.119384 | 0.317797 | 0.707169 | -0.5035 | 0.742266 | 1.126802 | 0.604413 | 2.10069 |
| ebi-a-GCST90001463 | finngen_R11_C3_OSTEOSARCOMA_EXALLC | Osteosarcoma (controls excluding all cancers) || id:finngen_R11_C3_OSTEOSARCOMA_EXALLC | CD62L- Dendritic Cell %Dendritic Cell || id:ebi-a-GCST90001463 | Inverse variance weighted | 4 | -0.11547 | 0.315534 | 0.714408 | -0.73391 | 0.50298 | 0.89095 | 0.480026 | 1.653642 |
| ebi-a-GCST90001464 | finngen_R11_C3_OSTEOSARCOMA_EXALLC | Osteosarcoma (controls excluding all cancers) || id:finngen_R11_C3_OSTEOSARCOMA_EXALLC | CD86+ myeloid Dendritic Cell Absolute Count || id:ebi-a-GCST90001464 | Inverse variance weighted | 5 | 0.117147 | 0.301053 | 0.697185 | -0.47292 | 0.707212 | 1.124285 | 0.623181 | 2.028328 |
| ebi-a-GCST90001465 | finngen_R11_C3_OSTEOSARCOMA_EXALLC | Osteosarcoma (controls excluding all cancers) || id:finngen_R11_C3_OSTEOSARCOMA_EXALLC | CD86+ myeloid Dendritic Cell %Dendritic Cell || id:ebi-a-GCST90001465 | Inverse variance weighted | 4 | 0.150873 | 0.307258 | 0.623405 | -0.45135 | 0.753099 | 1.162849 | 0.636766 | 2.123571 |
| ebi-a-GCST90001468 | finngen_R11_C3_OSTEOSARCOMA_EXALLC | Osteosarcoma (controls excluding all cancers) || id:finngen_R11_C3_OSTEOSARCOMA_EXALLC | CD62L- myeloid Dendritic Cell Absolute Count || id:ebi-a-GCST90001468 | Inverse variance weighted | 6 | 0.110778 | 0.295108 | 0.707377 | -0.46763 | 0.689189 | 1.117147 | 0.626483 | 1.9921 |
| ebi-a-GCST90001469 | finngen_R11_C3_OSTEOSARCOMA_EXALLC | Osteosarcoma (controls excluding all cancers) || id:finngen_R11_C3_OSTEOSARCOMA_EXALLC | CD62L- myeloid Dendritic Cell %Dendritic Cell || id:ebi-a-GCST90001469 | Inverse variance weighted | 6 | 0.113975 | 0.292305 | 0.696596 | -0.45894 | 0.686893 | 1.120724 | 0.631952 | 1.987531 |
| ebi-a-GCST90001471 | finngen_R11_C3_OSTEOSARCOMA_EXALLC | Osteosarcoma (controls excluding all cancers) || id:finngen_R11_C3_OSTEOSARCOMA_EXALLC | CD62L- plasmacytoid Dendritic Cell %Dendritic Cell || id:ebi-a-GCST90001471 | Inverse variance weighted | 2 | 0.009132 | 0.525134 | 0.986126 | -1.02013 | 1.038394 | 1.009174 | 0.360548 | 2.824677 |
| ebi-a-GCST90001472 | finngen_R11_C3_OSTEOSARCOMA_EXALLC | Osteosarcoma (controls excluding all cancers) || id:finngen_R11_C3_OSTEOSARCOMA_EXALLC | CD62L- CD86+ myeloid Dendritic Cell Absolute Count || id:ebi-a-GCST90001472 | Inverse variance weighted | 5 | 0.106377 | 0.264948 | 0.688051 | -0.41292 | 0.625674 | 1.112241 | 0.661715 | 1.869505 |
| ebi-a-GCST90001473 | finngen_R11_C3_OSTEOSARCOMA_EXALLC | Osteosarcoma (controls excluding all cancers) || id:finngen_R11_C3_OSTEOSARCOMA_EXALLC | CD62L- CD86+ myeloid Dendritic Cell %Dendritic Cell || id:ebi-a-GCST90001473 | Inverse variance weighted | 5 | 0.109935 | 0.264679 | 0.677884 | -0.40884 | 0.628707 | 1.116206 | 0.664423 | 1.875184 |
| ebi-a-GCST90001474 | finngen_R11_C3_OSTEOSARCOMA_EXALLC | Osteosarcoma (controls excluding all cancers) || id:finngen_R11_C3_OSTEOSARCOMA_EXALLC | Plasmacytoid Dendritic Cell %Dendritic Cell || id:ebi-a-GCST90001474 | Inverse variance weighted | 2 | -0.15995 | 0.420333 | 0.703554 | -0.9838 | 0.663904 | 0.852188 | 0.373888 | 1.94236 |
| ebi-a-GCST90001475 | finngen_R11_C3_OSTEOSARCOMA_EXALLC | Osteosarcoma (controls excluding all cancers) || id:finngen_R11_C3_OSTEOSARCOMA_EXALLC | HLA DR++ monocyte %monocyte || id:ebi-a-GCST90001475 | Inverse variance weighted | 4 | -0.47957 | 0.39537 | 0.225146 | -1.25449 | 0.295358 | 0.619052 | 0.285221 | 1.343607 |
| ebi-a-GCST90001476 | finngen_R11_C3_OSTEOSARCOMA_EXALLC | Osteosarcoma (controls excluding all cancers) || id:finngen_R11_C3_OSTEOSARCOMA_EXALLC | HLA DR++ monocyte %leukocyte || id:ebi-a-GCST90001476 | Inverse variance weighted | 2 | -0.20191 | 0.507269 | 0.690611 | -1.19615 | 0.792342 | 0.817171 | 0.302355 | 2.208562 |
| ebi-a-GCST90001478 | finngen_R11_C3_OSTEOSARCOMA_EXALLC | Osteosarcoma (controls excluding all cancers) || id:finngen_R11_C3_OSTEOSARCOMA_EXALLC | CD4 regulatory T cell %CD4+ T cell || id:ebi-a-GCST90001478 | Inverse variance weighted | 2 | 0.649355 | 0.988943 | 0.511428 | -1.28897 | 2.587683 | 1.914306 | 0.275554 | 13.29892 |
| ebi-a-GCST90001480 | finngen_R11_C3_OSTEOSARCOMA_EXALLC | Osteosarcoma (controls excluding all cancers) || id:finngen_R11_C3_OSTEOSARCOMA_EXALLC | Resting CD4 regulatory T cell Absolute Count || id:ebi-a-GCST90001480 | Inverse variance weighted | 4 | -0.107 | 0.395572 | 0.786777 | -0.88232 | 0.66832 | 0.898524 | 0.41382 | 1.950956 |
| ebi-a-GCST90001481 | finngen_R11_C3_OSTEOSARCOMA_EXALLC | Osteosarcoma (controls excluding all cancers) || id:finngen_R11_C3_OSTEOSARCOMA_EXALLC | Resting CD4 regulatory T cell %CD4 regulatory T cell || id:ebi-a-GCST90001481 | Inverse variance weighted | 11 | 0.000422 | 0.178352 | 0.998111 | -0.34915 | 0.349992 | 1.000422 | 0.705289 | 1.419056 |
| ebi-a-GCST90001482 | finngen_R11_C3_OSTEOSARCOMA_EXALLC | Osteosarcoma (controls excluding all cancers) || id:finngen_R11_C3_OSTEOSARCOMA_EXALLC | Resting CD4 regulatory T cell %CD4+ T cell || id:ebi-a-GCST90001482 | Inverse variance weighted | 6 | -0.09837 | 0.22814 | 0.666332 | -0.54553 | 0.348783 | 0.906313 | 0.579537 | 1.417342 |
| ebi-a-GCST90001483 | finngen_R11_C3_OSTEOSARCOMA_EXALLC | Osteosarcoma (controls excluding all cancers) || id:finngen_R11_C3_OSTEOSARCOMA_EXALLC | CD39+ resting CD4 regulatory T cell Absolute Count || id:ebi-a-GCST90001483 | Inverse variance weighted | 10 | 0.033806 | 0.208803 | 0.871382 | -0.37545 | 0.44306 | 1.034384 | 0.686981 | 1.557466 |
| ebi-a-GCST90001484 | finngen_R11_C3_OSTEOSARCOMA_EXALLC | Osteosarcoma (controls excluding all cancers) || id:finngen_R11_C3_OSTEOSARCOMA_EXALLC | CD39+ resting CD4 regulatory T cell %resting CD4 regulatory T cell || id:ebi-a-GCST90001484 | Inverse variance weighted | 7 | 0.139758 | 0.276942 | 0.613807 | -0.40305 | 0.682564 | 1.149995 | 0.66828 | 1.978945 |
| ebi-a-GCST90001485 | finngen_R11_C3_OSTEOSARCOMA_EXALLC | Osteosarcoma (controls excluding all cancers) || id:finngen_R11_C3_OSTEOSARCOMA_EXALLC | CD39+ resting CD4 regulatory T cell %CD4 regulatory T cell || id:ebi-a-GCST90001485 | Inverse variance weighted | 13 | 0.078194 | 0.122405 | 0.522946 | -0.16172 | 0.318108 | 1.081332 | 0.850679 | 1.374524 |
| ebi-a-GCST90001486 | finngen_R11_C3_OSTEOSARCOMA_EXALLC | Osteosarcoma (controls excluding all cancers) || id:finngen_R11_C3_OSTEOSARCOMA_EXALLC | Activated CD4 regulatory T cell Absolute Count || id:ebi-a-GCST90001486 | Inverse variance weighted | 2 | -0.05766 | 0.455675 | 0.899308 | -0.95078 | 0.835463 | 0.943971 | 0.386439 | 2.305882 |
| ebi-a-GCST90001487 | finngen_R11_C3_OSTEOSARCOMA_EXALLC | Osteosarcoma (controls excluding all cancers) || id:finngen_R11_C3_OSTEOSARCOMA_EXALLC | Activated CD4 regulatory T cell %CD4 regulatory T cell || id:ebi-a-GCST90001487 | Inverse variance weighted | 4 | -0.27016 | 0.329452 | 0.412196 | -0.91589 | 0.375564 | 0.763256 | 0.400161 | 1.455812 |
| ebi-a-GCST90001489 | finngen_R11_C3_OSTEOSARCOMA_EXALLC | Osteosarcoma (controls excluding all cancers) || id:finngen_R11_C3_OSTEOSARCOMA_EXALLC | CD39+ activated CD4 regulatory T cell Absolute Count || id:ebi-a-GCST90001489 | Inverse variance weighted | 4 | 0.114566 | 0.364803 | 0.753483 | -0.60045 | 0.829581 | 1.121387 | 0.548566 | 2.292358 |
| ebi-a-GCST90001491 | finngen_R11_C3_OSTEOSARCOMA_EXALLC | Osteosarcoma (controls excluding all cancers) || id:finngen_R11_C3_OSTEOSARCOMA_EXALLC | CD39+ activated CD4 regulatory T cell %CD4 regulatory T cell || id:ebi-a-GCST90001491 | Inverse variance weighted | 6 | -0.03435 | 0.167422 | 0.837447 | -0.3625 | 0.293799 | 0.966235 | 0.695938 | 1.341514 |
| ebi-a-GCST90001492 | finngen_R11_C3_OSTEOSARCOMA_EXALLC | Osteosarcoma (controls excluding all cancers) || id:finngen_R11_C3_OSTEOSARCOMA_EXALLC | Secreting CD4 regulatory T cell Absolute Count || id:ebi-a-GCST90001492 | Inverse variance weighted | 4 | -0.16905 | 0.215272 | 0.432289 | -0.59098 | 0.252884 | 0.844468 | 0.553783 | 1.287734 |
| ebi-a-GCST90001493 | finngen_R11_C3_OSTEOSARCOMA_EXALLC | Osteosarcoma (controls excluding all cancers) || id:finngen_R11_C3_OSTEOSARCOMA_EXALLC | Secreting CD4 regulatory T cell %CD4 regulatory T cell || id:ebi-a-GCST90001493 | Inverse variance weighted | 6 | -0.14251 | 0.16126 | 0.376859 | -0.45858 | 0.173565 | 0.867183 | 0.632183 | 1.189538 |
| ebi-a-GCST90001494 | finngen_R11_C3_OSTEOSARCOMA_EXALLC | Osteosarcoma (controls excluding all cancers) || id:finngen_R11_C3_OSTEOSARCOMA_EXALLC | Secreting CD4 regulatory T cell %CD4+ T cell || id:ebi-a-GCST90001494 | Inverse variance weighted | 7 | -0.0408 | 0.153593 | 0.790495 | -0.34185 | 0.260238 | 0.960016 | 0.710456 | 1.297239 |
| ebi-a-GCST90001495 | finngen_R11_C3_OSTEOSARCOMA_EXALLC | Osteosarcoma (controls excluding all cancers) || id:finngen_R11_C3_OSTEOSARCOMA_EXALLC | CD39+ secreting CD4 regulatory T cell Absolute Count || id:ebi-a-GCST90001495 | Inverse variance weighted | 5 | -0.04647 | 0.154247 | 0.763221 | -0.34879 | 0.255856 | 0.954596 | 0.705541 | 1.291567 |
| ebi-a-GCST90001496 | finngen_R11_C3_OSTEOSARCOMA_EXALLC | Osteosarcoma (controls excluding all cancers) || id:finngen_R11_C3_OSTEOSARCOMA_EXALLC | CD39+ secreting CD4 regulatory T cell %secreting CD4 regulatory T cell || id:ebi-a-GCST90001496 | Inverse variance weighted | 7 | -0.04028 | 0.147047 | 0.784142 | -0.32849 | 0.247931 | 0.960521 | 0.720009 | 1.281372 |
| ebi-a-GCST90001497 | finngen_R11_C3_OSTEOSARCOMA_EXALLC | Osteosarcoma (controls excluding all cancers) || id:finngen_R11_C3_OSTEOSARCOMA_EXALLC | CD39+ secreting CD4 regulatory T cell %CD4 regulatory T cell || id:ebi-a-GCST90001497 | Inverse variance weighted | 7 | -0.02336 | 0.150524 | 0.876686 | -0.31838 | 0.27167 | 0.976914 | 0.727323 | 1.312154 |
| ebi-a-GCST90001499 | finngen_R11_C3_OSTEOSARCOMA_EXALLC | Osteosarcoma (controls excluding all cancers) || id:finngen_R11_C3_OSTEOSARCOMA_EXALLC | Activated & resting CD4 regulatory T cell %CD4 regulatory T cell || id:ebi-a-GCST90001499 | Inverse variance weighted | 6 | 0.140608 | 0.158338 | 0.374529 | -0.16973 | 0.45095 | 1.150973 | 0.843889 | 1.569803 |
| ebi-a-GCST90001500 | finngen_R11_C3_OSTEOSARCOMA_EXALLC | Osteosarcoma (controls excluding all cancers) || id:finngen_R11_C3_OSTEOSARCOMA_EXALLC | Activated & resting CD4 regulatory T cell %CD4+ T cell || id:ebi-a-GCST90001500 | Inverse variance weighted | 3 | -0.18638 | 0.370424 | 0.614848 | -0.91242 | 0.539646 | 0.829954 | 0.401553 | 1.715399 |
| ebi-a-GCST90001501 | finngen_R11_C3_OSTEOSARCOMA_EXALLC | Osteosarcoma (controls excluding all cancers) || id:finngen_R11_C3_OSTEOSARCOMA_EXALLC | Activated & secreting CD4 regulatory T cell Absolute Count || id:ebi-a-GCST90001501 | Inverse variance weighted | 4 | -0.16754 | 0.216136 | 0.438245 | -0.59117 | 0.256086 | 0.845743 | 0.553681 | 1.291864 |
| ebi-a-GCST90001502 | finngen_R11_C3_OSTEOSARCOMA_EXALLC | Osteosarcoma (controls excluding all cancers) || id:finngen_R11_C3_OSTEOSARCOMA_EXALLC | Activated & secreting CD4 regulatory T cell %CD4 regulatory T cell || id:ebi-a-GCST90001502 | Inverse variance weighted | 9 | -0.1855 | 0.139876 | 0.184783 | -0.45966 | 0.088658 | 0.830689 | 0.6315 | 1.092706 |
| ebi-a-GCST90001503 | finngen_R11_C3_OSTEOSARCOMA_EXALLC | Osteosarcoma (controls excluding all cancers) || id:finngen_R11_C3_OSTEOSARCOMA_EXALLC | Activated & secreting CD4 regulatory T cell %CD4+ T cell || id:ebi-a-GCST90001503 | Inverse variance weighted | 9 | -0.01176 | 0.129564 | 0.927664 | -0.26571 | 0.242182 | 0.988307 | 0.766664 | 1.274027 |
| ebi-a-GCST90001505 | finngen_R11_C3_OSTEOSARCOMA_EXALLC | Osteosarcoma (controls excluding all cancers) || id:finngen_R11_C3_OSTEOSARCOMA_EXALLC | CD25++ CD4+ T cell %CD4+ T cell || id:ebi-a-GCST90001505 | Inverse variance weighted | 2 | 0.599923 | 0.667593 | 0.368847 | -0.70856 | 1.908404 | 1.821978 | 0.492353 | 6.742322 |
| ebi-a-GCST90001507 | finngen_R11_C3_OSTEOSARCOMA_EXALLC | Osteosarcoma (controls excluding all cancers) || id:finngen_R11_C3_OSTEOSARCOMA_EXALLC | CD25++ CD45RA+ CD4 not regulatory T cell Absolute Count || id:ebi-a-GCST90001507 | Inverse variance weighted (multiplicative random effects) | 3 | 0.375388 | 0.818898 | 0.646661 | -1.22965 | 1.980428 | 1.455556 | 0.292394 | 7.245844 |
| ebi-a-GCST90001508 | finngen_R11_C3_OSTEOSARCOMA_EXALLC | Osteosarcoma (controls excluding all cancers) || id:finngen_R11_C3_OSTEOSARCOMA_EXALLC | CD25++ CD45RA+ CD4 not regulatory T cell %CD4+ T cell || id:ebi-a-GCST90001508 | Inverse variance weighted | 5 | 0.310419 | 0.385033 | 0.420119 | -0.44424 | 1.065084 | 1.363997 | 0.641308 | 2.901082 |
| ebi-a-GCST90001509 | finngen_R11_C3_OSTEOSARCOMA_EXALLC | Osteosarcoma (controls excluding all cancers) || id:finngen_R11_C3_OSTEOSARCOMA_EXALLC | CD25++ CD45RA+ CD4 not regulatory T cell %T cell || id:ebi-a-GCST90001509 | Inverse variance weighted | 5 | 0.341966 | 0.400897 | 0.393659 | -0.44379 | 1.127724 | 1.407712 | 0.641598 | 3.08862 |
| ebi-a-GCST90001510 | finngen_R11_C3_OSTEOSARCOMA_EXALLC | Osteosarcoma (controls excluding all cancers) || id:finngen_R11_C3_OSTEOSARCOMA_EXALLC | CD25++ CD45RA- CD4 not regulatory T cell Absolute Count || id:ebi-a-GCST90001510 | Inverse variance weighted | 2 | 0.237526 | 0.629148 | 0.705775 | -0.9956 | 1.470656 | 1.268108 | 0.3695 | 4.35209 |
| ebi-a-GCST90001511 | finngen_R11_C3_OSTEOSARCOMA_EXALLC | Osteosarcoma (controls excluding all cancers) || id:finngen_R11_C3_OSTEOSARCOMA_EXALLC | CD25++ CD45RA- CD4 not regulatory T cell %CD4+ T cell || id:ebi-a-GCST90001511 | Inverse variance weighted | 3 | 0.160981 | 0.304032 | 0.596469 | -0.43492 | 0.756884 | 1.174662 | 0.647315 | 2.131624 |
| ebi-a-GCST90001512 | finngen_R11_C3_OSTEOSARCOMA_EXALLC | Osteosarcoma (controls excluding all cancers) || id:finngen_R11_C3_OSTEOSARCOMA_EXALLC | CD25++ CD45RA- CD4 not regulatory T cell %T cell || id:ebi-a-GCST90001512 | Inverse variance weighted | 3 | -0.19832 | 0.281881 | 0.481702 | -0.75081 | 0.354164 | 0.820105 | 0.471985 | 1.424989 |
| ebi-a-GCST90001514 | finngen_R11_C3_OSTEOSARCOMA_EXALLC | Osteosarcoma (controls excluding all cancers) || id:finngen_R11_C3_OSTEOSARCOMA_EXALLC | Hematopoietic Stem Cell Absolute Count || id:ebi-a-GCST90001514 | Inverse variance weighted | 2 | -0.18064 | 0.282686 | 0.522811 | -0.73471 | 0.373423 | 0.834734 | 0.479646 | 1.452699 |
| ebi-a-GCST90001515 | finngen_R11_C3_OSTEOSARCOMA_EXALLC | Osteosarcoma (controls excluding all cancers) || id:finngen_R11_C3_OSTEOSARCOMA_EXALLC | Immature Myeloid-Derived Suppressor Cells Absolute Count || id:ebi-a-GCST90001515 | Inverse variance weighted | 2 | 0.414271 | 0.378151 | 0.273291 | -0.32691 | 1.155448 | 1.513267 | 0.721152 | 3.175446 |
| ebi-a-GCST90001516 | finngen_R11_C3_OSTEOSARCOMA_EXALLC | Osteosarcoma (controls excluding all cancers) || id:finngen_R11_C3_OSTEOSARCOMA_EXALLC | Immature Myeloid-Derived Suppressor Cells %CD33dim HLA DR- CD66b- || id:ebi-a-GCST90001516 | Inverse variance weighted | 2 | 0.620736 | 0.413968 | 0.13375 | -0.19064 | 1.432113 | 1.860296 | 0.826429 | 4.187538 |
| ebi-a-GCST90001520 | finngen_R11_C3_OSTEOSARCOMA_EXALLC | Osteosarcoma (controls excluding all cancers) || id:finngen_R11_C3_OSTEOSARCOMA_EXALLC | CD33+ HLA DR+ CD14dim Absolute Count || id:ebi-a-GCST90001520 | Inverse variance weighted | 2 | -0.06092 | 0.485381 | 0.900114 | -1.01227 | 0.890423 | 0.940895 | 0.363393 | 2.436159 |
| ebi-a-GCST90001524 | finngen_R11_C3_OSTEOSARCOMA_EXALLC | Osteosarcoma (controls excluding all cancers) || id:finngen_R11_C3_OSTEOSARCOMA_EXALLC | Granulocytic Myeloid-Derived Suppressor Cells Absolute Count || id:ebi-a-GCST90001524 | Inverse variance weighted | 2 | 0.581309 | 0.838397 | 0.488085 | -1.06195 | 2.224567 | 1.788378 | 0.345781 | 9.249475 |
| ebi-a-GCST90001526 | finngen_R11_C3_OSTEOSARCOMA_EXALLC | Osteosarcoma (controls excluding all cancers) || id:finngen_R11_C3_OSTEOSARCOMA_EXALLC | CD33dim HLA DR+ CD11b+ %CD33dim HLA DR+ || id:ebi-a-GCST90001526 | Inverse variance weighted | 3 | -0.05091 | 0.379405 | 0.893247 | -0.79455 | 0.692719 | 0.95036 | 0.451785 | 1.999144 |
| ebi-a-GCST90001527 | finngen_R11_C3_OSTEOSARCOMA_EXALLC | Osteosarcoma (controls excluding all cancers) || id:finngen_R11_C3_OSTEOSARCOMA_EXALLC | CD33dim HLA DR+ CD11b- Absolute Count || id:ebi-a-GCST90001527 | Inverse variance weighted | 2 | 0.865585 | 0.582288 | 0.13714 | -0.2757 | 2.006868 | 2.376396 | 0.759042 | 7.439982 |
| ebi-a-GCST90001528 | finngen_R11_C3_OSTEOSARCOMA_EXALLC | Osteosarcoma (controls excluding all cancers) || id:finngen_R11_C3_OSTEOSARCOMA_EXALLC | CD33dim HLA DR+ CD11b- %CD33dim HLA DR+ || id:ebi-a-GCST90001528 | Inverse variance weighted | 3 | 0.047473 | 0.381077 | 0.900859 | -0.69944 | 0.794383 | 1.048618 | 0.496865 | 2.213076 |
| ebi-a-GCST90001530 | finngen_R11_C3_OSTEOSARCOMA_EXALLC | Osteosarcoma (controls excluding all cancers) || id:finngen_R11_C3_OSTEOSARCOMA_EXALLC | Monocytic Myeloid-Derived Suppressor Cells Absolute Count || id:ebi-a-GCST90001530 | Inverse variance weighted | 5 | 0.100327 | 0.301224 | 0.739086 | -0.49007 | 0.690725 | 1.105532 | 0.612582 | 1.995162 |
| ebi-a-GCST90001531 | finngen_R11_C3_OSTEOSARCOMA_EXALLC | Osteosarcoma (controls excluding all cancers) || id:finngen_R11_C3_OSTEOSARCOMA_EXALLC | CD33dim HLA DR- Absolute Count || id:ebi-a-GCST90001531 | Inverse variance weighted | 3 | -0.17789 | 0.146526 | 0.224728 | -0.46508 | 0.109301 | 0.837034 | 0.628084 | 1.115498 |
| ebi-a-GCST90001532 | finngen_R11_C3_OSTEOSARCOMA_EXALLC | Osteosarcoma (controls excluding all cancers) || id:finngen_R11_C3_OSTEOSARCOMA_EXALLC | Basophil Absolute Count || id:ebi-a-GCST90001532 | Inverse variance weighted | 3 | -0.17078 | 0.150777 | 0.257364 | -0.4663 | 0.124746 | 0.84301 | 0.62732 | 1.132861 |
| ebi-a-GCST90001533 | finngen_R11_C3_OSTEOSARCOMA_EXALLC | Osteosarcoma (controls excluding all cancers) || id:finngen_R11_C3_OSTEOSARCOMA_EXALLC | Basophil %CD33dim HLA DR- CD66b- || id:ebi-a-GCST90001533 | Inverse variance weighted | 3 | 0.04924 | 0.422375 | 0.907194 | -0.77862 | 0.877095 | 1.050472 | 0.459041 | 2.403906 |
| ebi-a-GCST90001534 | finngen_R11_C3_OSTEOSARCOMA_EXALLC | Osteosarcoma (controls excluding all cancers) || id:finngen_R11_C3_OSTEOSARCOMA_EXALLC | CD45RA- CD4+ T cell Absolute Count || id:ebi-a-GCST90001534 | Inverse variance weighted | 2 | -0.64244 | 0.505513 | 0.203772 | -1.63325 | 0.34836 | 0.526005 | 0.195294 | 1.416742 |
| ebi-a-GCST90001535 | finngen_R11_C3_OSTEOSARCOMA_EXALLC | Osteosarcoma (controls excluding all cancers) || id:finngen_R11_C3_OSTEOSARCOMA_EXALLC | CD45RA- CD4+ T cell %CD4+ T cell || id:ebi-a-GCST90001535 | Inverse variance weighted | 4 | -0.22551 | 0.318622 | 0.4791 | -0.85 | 0.398994 | 0.798113 | 0.427413 | 1.490325 |
| ebi-a-GCST90001536 | finngen_R11_C3_OSTEOSARCOMA_EXALLC | Osteosarcoma (controls excluding all cancers) || id:finngen_R11_C3_OSTEOSARCOMA_EXALLC | CD45RA- CD4+ T cell %T cell || id:ebi-a-GCST90001536 | Inverse variance weighted | 2 | -0.18899 | 0.999791 | 0.850073 | -2.14858 | 1.770605 | 0.827799 | 0.11665 | 5.874405 |
| ebi-a-GCST90001540 | finngen_R11_C3_OSTEOSARCOMA_EXALLC | Osteosarcoma (controls excluding all cancers) || id:finngen_R11_C3_OSTEOSARCOMA_EXALLC | Naive CD4+ T cell Absolute Count || id:ebi-a-GCST90001540 | Inverse variance weighted | 2 | 0.222128 | 0.599026 | 0.710776 | -0.95196 | 1.396219 | 1.248731 | 0.385982 | 4.039897 |
| ebi-a-GCST90001541 | finngen_R11_C3_OSTEOSARCOMA_EXALLC | Osteosarcoma (controls excluding all cancers) || id:finngen_R11_C3_OSTEOSARCOMA_EXALLC | Naive CD4+ T cell %CD4+ T cell || id:ebi-a-GCST90001541 | Inverse variance weighted | 4 | 0.251029 | 0.560169 | 0.654059 | -0.8469 | 1.34896 | 1.285347 | 0.428741 | 3.853416 |
| ebi-a-GCST90001543 | finngen_R11_C3_OSTEOSARCOMA_EXALLC | Osteosarcoma (controls excluding all cancers) || id:finngen_R11_C3_OSTEOSARCOMA_EXALLC | Effector Memory CD4+ T cell %CD4+ T cell || id:ebi-a-GCST90001543 | Inverse variance weighted | 3 | -0.61561 | 0.501181 | 0.219326 | -1.59793 | 0.366703 | 0.540311 | 0.202316 | 1.442969 |
| ebi-a-GCST90001544 | finngen_R11_C3_OSTEOSARCOMA_EXALLC | Osteosarcoma (controls excluding all cancers) || id:finngen_R11_C3_OSTEOSARCOMA_EXALLC | Effector Memory CD4+ T cell %T cell || id:ebi-a-GCST90001544 | Inverse variance weighted | 4 | -0.5314 | 0.470647 | 0.258859 | -1.45387 | 0.391064 | 0.587779 | 0.233664 | 1.478554 |
| ebi-a-GCST90001545 | finngen_R11_C3_OSTEOSARCOMA_EXALLC | Osteosarcoma (controls excluding all cancers) || id:finngen_R11_C3_OSTEOSARCOMA_EXALLC | Terminally Differentiated CD4+ T cell Absolute Count || id:ebi-a-GCST90001545 | Inverse variance weighted | 2 | -1.8391 | 0.773854 | 0.017476 | -3.35585 | -0.32235 | 0.158961 | 0.03488 | 0.724448 |
| ebi-a-GCST90001546 | finngen_R11_C3_OSTEOSARCOMA_EXALLC | Osteosarcoma (controls excluding all cancers) || id:finngen_R11_C3_OSTEOSARCOMA_EXALLC | Terminally Differentiated CD4+ T cell %CD4+ T cell || id:ebi-a-GCST90001546 | Inverse variance weighted | 5 | -0.33195 | 0.460222 | 0.470732 | -1.23399 | 0.570082 | 0.717521 | 0.291129 | 1.768412 |
| ebi-a-GCST90001547 | finngen_R11_C3_OSTEOSARCOMA_EXALLC | Osteosarcoma (controls excluding all cancers) || id:finngen_R11_C3_OSTEOSARCOMA_EXALLC | Terminally Differentiated CD4+ T cell %T cell || id:ebi-a-GCST90001547 | Inverse variance weighted | 6 | -0.24612 | 0.32258 | 0.445481 | -0.87838 | 0.386138 | 0.781829 | 0.415457 | 1.471288 |
| ebi-a-GCST90001553 | finngen_R11_C3_OSTEOSARCOMA_EXALLC | Osteosarcoma (controls excluding all cancers) || id:finngen_R11_C3_OSTEOSARCOMA_EXALLC | Naive CD8+ T cell %T cell || id:ebi-a-GCST90001553 | Inverse variance weighted | 3 | 0.011358 | 0.046664 | 0.807696 | -0.0801 | 0.102819 | 1.011423 | 0.923021 | 1.108291 |
| ebi-a-GCST90001554 | finngen_R11_C3_OSTEOSARCOMA_EXALLC | Osteosarcoma (controls excluding all cancers) || id:finngen_R11_C3_OSTEOSARCOMA_EXALLC | Effector Memory CD8+ T cell Absolute Count || id:ebi-a-GCST90001554 | Inverse variance weighted | 2 | -0.10413 | 0.362246 | 0.773762 | -0.81413 | 0.605872 | 0.901108 | 0.443024 | 1.832849 |
| ebi-a-GCST90001555 | finngen_R11_C3_OSTEOSARCOMA_EXALLC | Osteosarcoma (controls excluding all cancers) || id:finngen_R11_C3_OSTEOSARCOMA_EXALLC | Effector Memory CD8+ T cell %CD8+ T cell || id:ebi-a-GCST90001555 | Inverse variance weighted | 4 | -0.07553 | 0.286717 | 0.792213 | -0.6375 | 0.486433 | 0.92725 | 0.528614 | 1.626504 |
| ebi-a-GCST90001556 | finngen_R11_C3_OSTEOSARCOMA_EXALLC | Osteosarcoma (controls excluding all cancers) || id:finngen_R11_C3_OSTEOSARCOMA_EXALLC | Effector Memory CD8+ T cell %T cell || id:ebi-a-GCST90001556 | Inverse variance weighted | 2 | 0.151245 | 0.389455 | 0.697757 | -0.61209 | 0.914577 | 1.163281 | 0.542218 | 2.49572 |
| ebi-a-GCST90001558 | finngen_R11_C3_OSTEOSARCOMA_EXALLC | Osteosarcoma (controls excluding all cancers) || id:finngen_R11_C3_OSTEOSARCOMA_EXALLC | Terminally Differentiated CD8+ T cell %CD8+ T cell || id:ebi-a-GCST90001558 | Inverse variance weighted | 3 | 0.006366 | 0.709355 | 0.992839 | -1.38397 | 1.396702 | 1.006387 | 0.250582 | 4.041847 |
| ebi-a-GCST90001559 | finngen_R11_C3_OSTEOSARCOMA_EXALLC | Osteosarcoma (controls excluding all cancers) || id:finngen_R11_C3_OSTEOSARCOMA_EXALLC | Terminally Differentiated CD8+ T cell %T cell || id:ebi-a-GCST90001559 | Inverse variance weighted | 2 | 0.26116 | 0.798641 | 0.743664 | -1.30418 | 1.826496 | 1.298435 | 0.271396 | 6.212083 |
| ebi-a-GCST90001560 | finngen_R11_C3_OSTEOSARCOMA_EXALLC | Osteosarcoma (controls excluding all cancers) || id:finngen_R11_C3_OSTEOSARCOMA_EXALLC | CD45RA+ CD8+ T cell Absolute Count || id:ebi-a-GCST90001560 | Inverse variance weighted | 3 | 1.169803 | 0.75174 | 0.119678 | -0.30361 | 2.643213 | 3.221359 | 0.738151 | 14.05831 |
| ebi-a-GCST90001561 | finngen_R11_C3_OSTEOSARCOMA_EXALLC | Osteosarcoma (controls excluding all cancers) || id:finngen_R11_C3_OSTEOSARCOMA_EXALLC | CD45RA+ CD8+ T cell %CD8+ T cell || id:ebi-a-GCST90001561 | Inverse variance weighted | 5 | -0.02267 | 0.126727 | 0.858021 | -0.27106 | 0.225715 | 0.977584 | 0.762574 | 1.253218 |
| ebi-a-GCST90001562 | finngen_R11_C3_OSTEOSARCOMA_EXALLC | Osteosarcoma (controls excluding all cancers) || id:finngen_R11_C3_OSTEOSARCOMA_EXALLC | CD45RA+ CD8+ T cell %T cell || id:ebi-a-GCST90001562 | Inverse variance weighted | 3 | 0.662949 | 0.635587 | 0.296925 | -0.5828 | 1.908699 | 1.940507 | 0.558333 | 6.744311 |
| ebi-a-GCST90001569 | finngen_R11_C3_OSTEOSARCOMA_EXALLC | Osteosarcoma (controls excluding all cancers) || id:finngen_R11_C3_OSTEOSARCOMA_EXALLC | Effector Memory CD4-CD8- T cell Absolute Count || id:ebi-a-GCST90001569 | Inverse variance weighted | 4 | 0.637671 | 0.765519 | 0.404849 | -0.86275 | 2.138087 | 1.892068 | 0.422002 | 8.483195 |
| ebi-a-GCST90001570 | finngen_R11_C3_OSTEOSARCOMA_EXALLC | Osteosarcoma (controls excluding all cancers) || id:finngen_R11_C3_OSTEOSARCOMA_EXALLC | Effector Memory CD4-CD8- T cell %CD4-CD8- T cell || id:ebi-a-GCST90001570 | Inverse variance weighted | 4 | -0.17411 | 0.408956 | 0.670291 | -0.97567 | 0.627441 | 0.840203 | 0.376942 | 1.872812 |
| ebi-a-GCST90001571 | finngen_R11_C3_OSTEOSARCOMA_EXALLC | Osteosarcoma (controls excluding all cancers) || id:finngen_R11_C3_OSTEOSARCOMA_EXALLC | Effector Memory CD4-CD8- T cell %T cell || id:ebi-a-GCST90001571 | Inverse variance weighted | 3 | -0.57255 | 0.662265 | 0.387295 | -1.87059 | 0.725489 | 0.564085 | 0.154033 | 2.065741 |
| ebi-a-GCST90001572 | finngen_R11_C3_OSTEOSARCOMA_EXALLC | Osteosarcoma (controls excluding all cancers) || id:finngen_R11_C3_OSTEOSARCOMA_EXALLC | Terminally Differentiated CD4-CD8- T cell Absolute Count || id:ebi-a-GCST90001572 | Inverse variance weighted | 2 | 1.023794 | 0.947336 | 0.279827 | -0.83298 | 2.880571 | 2.783735 | 0.43475 | 17.82445 |
| ebi-a-GCST90001573 | finngen_R11_C3_OSTEOSARCOMA_EXALLC | Osteosarcoma (controls excluding all cancers) || id:finngen_R11_C3_OSTEOSARCOMA_EXALLC | Terminally Differentiated CD4-CD8- T cell %CD4-CD8- T cell || id:ebi-a-GCST90001573 | Inverse variance weighted | 2 | -0.15474 | 1.126098 | 0.890707 | -2.36189 | 2.052416 | 0.856641 | 0.094242 | 7.786689 |
| ebi-a-GCST90001574 | finngen_R11_C3_OSTEOSARCOMA_EXALLC | Osteosarcoma (controls excluding all cancers) || id:finngen_R11_C3_OSTEOSARCOMA_EXALLC | Terminally Differentiated CD4-CD8- T cell %T cell || id:ebi-a-GCST90001574 | Inverse variance weighted | 4 | 0.612556 | 0.602089 | 0.308971 | -0.56754 | 1.79265 | 1.845141 | 0.566919 | 6.005345 |
| ebi-a-GCST90001580 | finngen_R11_C3_OSTEOSARCOMA_EXALLC | Osteosarcoma (controls excluding all cancers) || id:finngen_R11_C3_OSTEOSARCOMA_EXALLC | CD14+ CD16+ monocyte Absolute Count || id:ebi-a-GCST90001580 | Inverse variance weighted | 3 | -0.13214 | 0.385299 | 0.731624 | -0.88733 | 0.623042 | 0.876214 | 0.411753 | 1.864591 |
| ebi-a-GCST90001581 | finngen_R11_C3_OSTEOSARCOMA_EXALLC | Osteosarcoma (controls excluding all cancers) || id:finngen_R11_C3_OSTEOSARCOMA_EXALLC | CD14- CD16- Absolute Count || id:ebi-a-GCST90001581 | Inverse variance weighted | 3 | 0.452803 | 0.770081 | 0.556537 | -1.05656 | 1.962162 | 1.572714 | 0.347651 | 7.114692 |
| ebi-a-GCST90001582 | finngen_R11_C3_OSTEOSARCOMA_EXALLC | Osteosarcoma (controls excluding all cancers) || id:finngen_R11_C3_OSTEOSARCOMA_EXALLC | CD14+ CD16- monocyte Absolute Count || id:ebi-a-GCST90001582 | Inverse variance weighted | 3 | 0.020563 | 0.754229 | 0.978249 | -1.45773 | 1.498853 | 1.020776 | 0.232765 | 4.476552 |
| ebi-a-GCST90001584 | finngen_R11_C3_OSTEOSARCOMA_EXALLC | Osteosarcoma (controls excluding all cancers) || id:finngen_R11_C3_OSTEOSARCOMA_EXALLC | CD14- CD16+ monocyte %monocyte || id:ebi-a-GCST90001584 | Inverse variance weighted | 2 | 0.205686 | 0.979698 | 0.833708 | -1.71452 | 2.125894 | 1.228368 | 0.18005 | 8.380385 |
| ebi-a-GCST90001585 | finngen_R11_C3_OSTEOSARCOMA_EXALLC | Osteosarcoma (controls excluding all cancers) || id:finngen_R11_C3_OSTEOSARCOMA_EXALLC | CD14+ CD16+ monocyte %monocyte || id:ebi-a-GCST90001585 | Inverse variance weighted | 3 | -0.12143 | 0.357004 | 0.733746 | -0.82116 | 0.578294 | 0.88565 | 0.43992 | 1.782994 |
| ebi-a-GCST90001586 | finngen_R11_C3_OSTEOSARCOMA_EXALLC | Osteosarcoma (controls excluding all cancers) || id:finngen_R11_C3_OSTEOSARCOMA_EXALLC | CD14+ CD16- monocyte %monocyte || id:ebi-a-GCST90001586 | Inverse variance weighted | 2 | 0.172513 | 0.836131 | 0.836539 | -1.4663 | 1.811329 | 1.188287 | 0.230777 | 6.118576 |
| ebi-a-GCST90001587 | finngen_R11_C3_OSTEOSARCOMA_EXALLC | Osteosarcoma (controls excluding all cancers) || id:finngen_R11_C3_OSTEOSARCOMA_EXALLC | CD16+ monocyte %monocyte || id:ebi-a-GCST90001587 | Inverse variance weighted | 2 | -0.17076 | 0.849106 | 0.840618 | -1.83501 | 1.49349 | 0.843026 | 0.159613 | 4.452609 |
| ebi-a-GCST90001588 | finngen_R11_C3_OSTEOSARCOMA_EXALLC | Osteosarcoma (controls excluding all cancers) || id:finngen_R11_C3_OSTEOSARCOMA_EXALLC | T/B cell || id:ebi-a-GCST90001588 | Inverse variance weighted | 2 | -2.21721 | 0.993944 | 0.0257 | -4.16534 | -0.26908 | 0.108913 | 0.015524 | 0.764085 |
| ebi-a-GCST90001594 | finngen_R11_C3_OSTEOSARCOMA_EXALLC | Osteosarcoma (controls excluding all cancers) || id:finngen_R11_C3_OSTEOSARCOMA_EXALLC | CD4+CD8+ T cell Absolute Count || id:ebi-a-GCST90001594 | Inverse variance weighted | 2 | 0.524502 | 0.610565 | 0.390317 | -0.67221 | 1.721209 | 1.689616 | 0.510581 | 5.591283 |
| ebi-a-GCST90001596 | finngen_R11_C3_OSTEOSARCOMA_EXALLC | Osteosarcoma (controls excluding all cancers) || id:finngen_R11_C3_OSTEOSARCOMA_EXALLC | CD8dim T cell Absolute Count || id:ebi-a-GCST90001596 | Inverse variance weighted | 3 | 0.351161 | 1.043596 | 0.736501 | -1.69429 | 2.396609 | 1.420715 | 0.18373 | 10.98586 |
| ebi-a-GCST90001597 | finngen_R11_C3_OSTEOSARCOMA_EXALLC | Osteosarcoma (controls excluding all cancers) || id:finngen_R11_C3_OSTEOSARCOMA_EXALLC | CD8dim T cell %T cell || id:ebi-a-GCST90001597 | Inverse variance weighted | 2 | -0.39278 | 0.961538 | 0.682917 | -2.27739 | 1.49184 | 0.675181 | 0.102551 | 4.445268 |
| ebi-a-GCST90001598 | finngen_R11_C3_OSTEOSARCOMA_EXALLC | Osteosarcoma (controls excluding all cancers) || id:finngen_R11_C3_OSTEOSARCOMA_EXALLC | CD4-CD8- T cell Absolute Count || id:ebi-a-GCST90001598 | Inverse variance weighted | 2 | 1.541633 | 1.297644 | 0.234824 | -1.00175 | 4.085015 | 4.672212 | 0.367236 | 59.44282 |
| ebi-a-GCST90001599 | finngen_R11_C3_OSTEOSARCOMA_EXALLC | Osteosarcoma (controls excluding all cancers) || id:finngen_R11_C3_OSTEOSARCOMA_EXALLC | CD4-CD8- T cell %T cell || id:ebi-a-GCST90001599 | Inverse variance weighted | 3 | 0.015421 | 0.696391 | 0.982333 | -1.34951 | 1.380347 | 1.01554 | 0.259368 | 3.976283 |
| ebi-a-GCST90001601 | finngen_R11_C3_OSTEOSARCOMA_EXALLC | Osteosarcoma (controls excluding all cancers) || id:finngen_R11_C3_OSTEOSARCOMA_EXALLC | Lymphocyte Absolute Count || id:ebi-a-GCST90001601 | Inverse variance weighted | 2 | -0.42423 | 0.748016 | 0.570615 | -1.89035 | 1.041877 | 0.654271 | 0.15102 | 2.834533 |
| ebi-a-GCST90001603 | finngen_R11_C3_OSTEOSARCOMA_EXALLC | Osteosarcoma (controls excluding all cancers) || id:finngen_R11_C3_OSTEOSARCOMA_EXALLC | T cell Absolute Count || id:ebi-a-GCST90001603 | Inverse variance weighted | 2 | -0.31205 | 0.720666 | 0.665012 | -1.72456 | 1.100454 | 0.731944 | 0.178252 | 3.005532 |
| ebi-a-GCST90001604 | finngen_R11_C3_OSTEOSARCOMA_EXALLC | Osteosarcoma (controls excluding all cancers) || id:finngen_R11_C3_OSTEOSARCOMA_EXALLC | T cell %lymphocyte || id:ebi-a-GCST90001604 | Inverse variance weighted | 2 | 0.408845 | 0.61633 | 0.507104 | -0.79916 | 1.616853 | 1.505079 | 0.449706 | 5.037212 |
| ebi-a-GCST90001609 | finngen_R11_C3_OSTEOSARCOMA_EXALLC | Osteosarcoma (controls excluding all cancers) || id:finngen_R11_C3_OSTEOSARCOMA_EXALLC | CD4+ CD8dim T cell Absolute Count || id:ebi-a-GCST90001609 | Inverse variance weighted | 2 | -0.32363 | 0.532806 | 0.543578 | -1.36793 | 0.720667 | 0.723516 | 0.254633 | 2.055805 |
| ebi-a-GCST90001610 | finngen_R11_C3_OSTEOSARCOMA_EXALLC | Osteosarcoma (controls excluding all cancers) || id:finngen_R11_C3_OSTEOSARCOMA_EXALLC | CD4+ CD8dim T cell %lymphocyte || id:ebi-a-GCST90001610 | Inverse variance weighted | 3 | -0.31852 | 0.39161 | 0.416005 | -1.08608 | 0.449031 | 0.727221 | 0.337537 | 1.566794 |
| ebi-a-GCST90001611 | finngen_R11_C3_OSTEOSARCOMA_EXALLC | Osteosarcoma (controls excluding all cancers) || id:finngen_R11_C3_OSTEOSARCOMA_EXALLC | CD4+ CD8dim T cell %leukocyte || id:ebi-a-GCST90001611 | Inverse variance weighted | 2 | -0.30825 | 0.491114 | 0.530233 | -1.27083 | 0.654335 | 0.734733 | 0.280599 | 1.923863 |
| ebi-a-GCST90001612 | finngen_R11_C3_OSTEOSARCOMA_EXALLC | Osteosarcoma (controls excluding all cancers) || id:finngen_R11_C3_OSTEOSARCOMA_EXALLC | CD8dim T cell %leukocyte || id:ebi-a-GCST90001612 | Inverse variance weighted | 2 | -0.39373 | 1.026055 | 0.701176 | -2.4048 | 1.617337 | 0.674535 | 0.090284 | 5.039653 |
| ebi-a-GCST90001613 | finngen_R11_C3_OSTEOSARCOMA_EXALLC | Osteosarcoma (controls excluding all cancers) || id:finngen_R11_C3_OSTEOSARCOMA_EXALLC | CD4-CD8- T cell %leukocyte || id:ebi-a-GCST90001613 | Inverse variance weighted | 4 | 0.863405 | 0.920177 | 0.348089 | -0.94014 | 2.666951 | 2.37122 | 0.390572 | 14.39601 |
| ebi-a-GCST90001614 | finngen_R11_C3_OSTEOSARCOMA_EXALLC | Osteosarcoma (controls excluding all cancers) || id:finngen_R11_C3_OSTEOSARCOMA_EXALLC | CD8+ and CD8dim T cell %leukocyte || id:ebi-a-GCST90001614 | Inverse variance weighted | 2 | -2.73977 | 1.024772 | 0.007505 | -4.74832 | -0.73122 | 0.064585 | 0.008666 | 0.481323 |
| ebi-a-GCST90001618 | finngen_R11_C3_OSTEOSARCOMA_EXALLC | Osteosarcoma (controls excluding all cancers) || id:finngen_R11_C3_OSTEOSARCOMA_EXALLC | HLA DR+ T cell Absolute Count || id:ebi-a-GCST90001618 | Inverse variance weighted | 3 | -0.07328 | 0.394562 | 0.852653 | -0.84663 | 0.700058 | 0.929337 | 0.42886 | 2.013869 |
| ebi-a-GCST90001619 | finngen_R11_C3_OSTEOSARCOMA_EXALLC | Osteosarcoma (controls excluding all cancers) || id:finngen_R11_C3_OSTEOSARCOMA_EXALLC | HLA DR+ T cell%T cell || id:ebi-a-GCST90001619 | Inverse variance weighted | 4 | -0.20008 | 0.352725 | 0.57055 | -0.89142 | 0.491261 | 0.818665 | 0.410072 | 1.634376 |
| ebi-a-GCST90001620 | finngen_R11_C3_OSTEOSARCOMA_EXALLC | Osteosarcoma (controls excluding all cancers) || id:finngen_R11_C3_OSTEOSARCOMA_EXALLC | HLA DR+ T cell%lymphocyte || id:ebi-a-GCST90001620 | Inverse variance weighted | 4 | -0.28937 | 0.406876 | 0.476961 | -1.08685 | 0.508107 | 0.748735 | 0.337279 | 1.662141 |
| ebi-a-GCST90001621 | finngen_R11_C3_OSTEOSARCOMA_EXALLC | Osteosarcoma (controls excluding all cancers) || id:finngen_R11_C3_OSTEOSARCOMA_EXALLC | Natural Killer T Absolute Count || id:ebi-a-GCST90001621 | Inverse variance weighted | 5 | 0.009522 | 0.612518 | 0.987597 | -1.19101 | 1.210057 | 1.009568 | 0.303913 | 3.353675 |
| ebi-a-GCST90001622 | finngen_R11_C3_OSTEOSARCOMA_EXALLC | Osteosarcoma (controls excluding all cancers) || id:finngen_R11_C3_OSTEOSARCOMA_EXALLC | Natural Killer T %T cell || id:ebi-a-GCST90001622 | Inverse variance weighted | 5 | -0.08035 | 0.538137 | 0.881304 | -1.1351 | 0.974397 | 0.922791 | 0.321389 | 2.649568 |
| ebi-a-GCST90001623 | finngen_R11_C3_OSTEOSARCOMA_EXALLC | Osteosarcoma (controls excluding all cancers) || id:finngen_R11_C3_OSTEOSARCOMA_EXALLC | Natural Killer T %lymphocyte || id:ebi-a-GCST90001623 | Inverse variance weighted | 7 | 0.113395 | 0.443127 | 0.798031 | -0.75513 | 0.981923 | 1.120074 | 0.469948 | 2.669586 |
| ebi-a-GCST90001624 | finngen_R11_C3_OSTEOSARCOMA_EXALLC | Osteosarcoma (controls excluding all cancers) || id:finngen_R11_C3_OSTEOSARCOMA_EXALLC | HLA DR+ CD4+ T cell Absolute Count || id:ebi-a-GCST90001624 | Inverse variance weighted | 2 | -0.25039 | 0.676097 | 0.711129 | -1.57554 | 1.074764 | 0.7785 | 0.206896 | 2.929302 |
| ebi-a-GCST90001626 | finngen_R11_C3_OSTEOSARCOMA_EXALLC | Osteosarcoma (controls excluding all cancers) || id:finngen_R11_C3_OSTEOSARCOMA_EXALLC | HLA DR+ CD4+ T cell %lymphocyte || id:ebi-a-GCST90001626 | Inverse variance weighted | 2 | -0.16084 | 0.61188 | 0.792651 | -1.36013 | 1.038441 | 0.851424 | 0.256627 | 2.824809 |
| ebi-a-GCST90001627 | finngen_R11_C3_OSTEOSARCOMA_EXALLC | Osteosarcoma (controls excluding all cancers) || id:finngen_R11_C3_OSTEOSARCOMA_EXALLC | HLA DR+ CD8+ T cell Absolute Count || id:ebi-a-GCST90001627 | Inverse variance weighted | 3 | -0.05341 | 0.404753 | 0.895019 | -0.84672 | 0.739906 | 0.947992 | 0.428817 | 2.095738 |
| ebi-a-GCST90001628 | finngen_R11_C3_OSTEOSARCOMA_EXALLC | Osteosarcoma (controls excluding all cancers) || id:finngen_R11_C3_OSTEOSARCOMA_EXALLC | HLA DR+ CD8+ T cell %T cell || id:ebi-a-GCST90001628 | Inverse variance weighted | 3 | 0.187112 | 0.393819 | 0.634701 | -0.58477 | 0.958996 | 1.205762 | 0.557232 | 2.609077 |
| ebi-a-GCST90001629 | finngen_R11_C3_OSTEOSARCOMA_EXALLC | Osteosarcoma (controls excluding all cancers) || id:finngen_R11_C3_OSTEOSARCOMA_EXALLC | HLA DR+ CD8+ T cell %lymphocyte || id:ebi-a-GCST90001629 | Inverse variance weighted | 2 | 0.131617 | 0.412146 | 0.749464 | -0.67619 | 0.939424 | 1.140672 | 0.508551 | 2.558507 |
| ebi-a-GCST90001630 | finngen_R11_C3_OSTEOSARCOMA_EXALLC | Osteosarcoma (controls excluding all cancers) || id:finngen_R11_C3_OSTEOSARCOMA_EXALLC | CD8+ Natural Killer T Absolute Count || id:ebi-a-GCST90001630 | Inverse variance weighted | 2 | 0.482488 | 0.934534 | 0.605653 | -1.3492 | 2.314174 | 1.620101 | 0.259448 | 10.11656 |
| ebi-a-GCST90001633 | finngen_R11_C3_OSTEOSARCOMA_EXALLC | Osteosarcoma (controls excluding all cancers) || id:finngen_R11_C3_OSTEOSARCOMA_EXALLC | CD8dim Natural Killer T Absolute Count || id:ebi-a-GCST90001633 | Inverse variance weighted | 5 | -0.32162 | 0.465678 | 0.489792 | -1.23434 | 0.591114 | 0.724977 | 0.291025 | 1.805998 |
| ebi-a-GCST90001634 | finngen_R11_C3_OSTEOSARCOMA_EXALLC | Osteosarcoma (controls excluding all cancers) || id:finngen_R11_C3_OSTEOSARCOMA_EXALLC | CD8dim Natural Killer T %T cell || id:ebi-a-GCST90001634 | Inverse variance weighted | 5 | -0.23333 | 0.432633 | 0.58967 | -1.08129 | 0.614636 | 0.791896 | 0.339159 | 1.848983 |
| ebi-a-GCST90001635 | finngen_R11_C3_OSTEOSARCOMA_EXALLC | Osteosarcoma (controls excluding all cancers) || id:finngen_R11_C3_OSTEOSARCOMA_EXALLC | CD8dim Natural Killer T %lymphocyte || id:ebi-a-GCST90001635 | Inverse variance weighted | 6 | -0.23586 | 0.417503 | 0.572126 | -1.05416 | 0.582448 | 0.789893 | 0.348484 | 1.790417 |
| ebi-a-GCST90001637 | finngen_R11_C3_OSTEOSARCOMA_EXALLC | Osteosarcoma (controls excluding all cancers) || id:finngen_R11_C3_OSTEOSARCOMA_EXALLC | CD4-CD8- Natural Killer T %T cell || id:ebi-a-GCST90001637 | Inverse variance weighted | 5 | -0.18483 | 0.431469 | 0.668386 | -1.0305 | 0.660853 | 0.831249 | 0.356827 | 1.936443 |
| ebi-a-GCST90001638 | finngen_R11_C3_OSTEOSARCOMA_EXALLC | Osteosarcoma (controls excluding all cancers) || id:finngen_R11_C3_OSTEOSARCOMA_EXALLC | CD4-CD8- Natural Killer T %lymphocyte || id:ebi-a-GCST90001638 | Inverse variance weighted | 6 | 0.00976 | 0.450153 | 0.982703 | -0.87254 | 0.89206 | 1.009807 | 0.417889 | 2.44015 |
| ebi-a-GCST90001643 | finngen_R11_C3_OSTEOSARCOMA_EXALLC | Osteosarcoma (controls excluding all cancers) || id:finngen_R11_C3_OSTEOSARCOMA_EXALLC | B cell %CD3- lymphocyte || id:ebi-a-GCST90001643 | Inverse variance weighted | 3 | -0.33268 | 0.362413 | 0.358635 | -1.04301 | 0.377646 | 0.716997 | 0.352391 | 1.458846 |
| ebi-a-GCST90001644 | finngen_R11_C3_OSTEOSARCOMA_EXALLC | Osteosarcoma (controls excluding all cancers) || id:finngen_R11_C3_OSTEOSARCOMA_EXALLC | B cell %lymphocyte || id:ebi-a-GCST90001644 | Inverse variance weighted | 2 | 1.670864 | 1.011726 | 0.098637 | -0.31212 | 3.653847 | 5.31676 | 0.731895 | 38.62296 |
| ebi-a-GCST90001645 | finngen_R11_C3_OSTEOSARCOMA_EXALLC | Osteosarcoma (controls excluding all cancers) || id:finngen_R11_C3_OSTEOSARCOMA_EXALLC | Natural Killer Absolute Count || id:ebi-a-GCST90001645 | Inverse variance weighted | 3 | -0.51098 | 0.903672 | 0.571771 | -2.28217 | 1.260219 | 0.599909 | 0.102062 | 3.526195 |
| ebi-a-GCST90001646 | finngen_R11_C3_OSTEOSARCOMA_EXALLC | Osteosarcoma (controls excluding all cancers) || id:finngen_R11_C3_OSTEOSARCOMA_EXALLC | Natural Killer %CD3- lymphocyte || id:ebi-a-GCST90001646 | Inverse variance weighted | 5 | 0.197344 | 0.420842 | 0.639122 | -0.62751 | 1.022194 | 1.218163 | 0.533922 | 2.779287 |
| ebi-a-GCST90001647 | finngen_R11_C3_OSTEOSARCOMA_EXALLC | Osteosarcoma (controls excluding all cancers) || id:finngen_R11_C3_OSTEOSARCOMA_EXALLC | Natural Killer %lymphocyte || id:ebi-a-GCST90001647 | Inverse variance weighted | 3 | -0.54486 | 0.785787 | 0.488062 | -2.085 | 0.995283 | 0.579923 | 0.124307 | 2.705489 |
| ebi-a-GCST90001648 | finngen_R11_C3_OSTEOSARCOMA_EXALLC | Osteosarcoma (controls excluding all cancers) || id:finngen_R11_C3_OSTEOSARCOMA_EXALLC | HLA DR+ Natural Killer Absolute Count || id:ebi-a-GCST90001648 | Inverse variance weighted | 4 | 0.028125 | 0.327175 | 0.931497 | -0.61314 | 0.669387 | 1.028524 | 0.541649 | 1.95304 |
| ebi-a-GCST90001649 | finngen_R11_C3_OSTEOSARCOMA_EXALLC | Osteosarcoma (controls excluding all cancers) || id:finngen_R11_C3_OSTEOSARCOMA_EXALLC | HLA DR+ Natural Killer %Natural Killer || id:ebi-a-GCST90001649 | Inverse variance weighted | 6 | 0.068848 | 0.304974 | 0.821396 | -0.5289 | 0.666598 | 1.071273 | 0.589252 | 1.9476 |
| ebi-a-GCST90001650 | finngen_R11_C3_OSTEOSARCOMA_EXALLC | Osteosarcoma (controls excluding all cancers) || id:finngen_R11_C3_OSTEOSARCOMA_EXALLC | HLA DR+ Natural Killer %CD3- lymphocyte || id:ebi-a-GCST90001650 | Inverse variance weighted | 4 | 0.09202 | 0.311047 | 0.767353 | -0.51763 | 0.701673 | 1.096387 | 0.595929 | 2.017124 |
| ebi-a-GCST90001654 | finngen_R11_C3_OSTEOSARCOMA_EXALLC | Osteosarcoma (controls excluding all cancers) || id:finngen_R11_C3_OSTEOSARCOMA_EXALLC | CD28- CD4-CD8- T cell Absolute Count || id:ebi-a-GCST90001654 | Inverse variance weighted | 2 | 1.640549 | 0.881208 | 0.062645 | -0.08662 | 3.367716 | 5.157999 | 0.917027 | 29.01218 |
| ebi-a-GCST90001658 | finngen_R11_C3_OSTEOSARCOMA_EXALLC | Osteosarcoma (controls excluding all cancers) || id:finngen_R11_C3_OSTEOSARCOMA_EXALLC | CD39+ CD4+ T cell %T cell || id:ebi-a-GCST90001658 | Inverse variance weighted | 6 | -0.03349 | 0.15167 | 0.82526 | -0.33076 | 0.263787 | 0.967068 | 0.718377 | 1.301851 |
| ebi-a-GCST90001659 | finngen_R11_C3_OSTEOSARCOMA_EXALLC | Osteosarcoma (controls excluding all cancers) || id:finngen_R11_C3_OSTEOSARCOMA_EXALLC | CD39+ CD4+ T cell %CD4+ T cell || id:ebi-a-GCST90001659 | Inverse variance weighted | 6 | -0.03218 | 0.150118 | 0.830267 | -0.32641 | 0.262052 | 0.968333 | 0.721509 | 1.299595 |
| ebi-a-GCST90001660 | finngen_R11_C3_OSTEOSARCOMA_EXALLC | Osteosarcoma (controls excluding all cancers) || id:finngen_R11_C3_OSTEOSARCOMA_EXALLC | CD39+ CD4+ T cell Absolute Count || id:ebi-a-GCST90001660 | Inverse variance weighted | 5 | 0.191111 | 0.337359 | 0.571059 | -0.47011 | 0.852334 | 1.210594 | 0.624933 | 2.345114 |
| ebi-a-GCST90001661 | finngen_R11_C3_OSTEOSARCOMA_EXALLC | Osteosarcoma (controls excluding all cancers) || id:finngen_R11_C3_OSTEOSARCOMA_EXALLC | CD28- CD8dim T cell %T cell || id:ebi-a-GCST90001661 | Inverse variance weighted | 3 | -0.01213 | 0.936166 | 0.989661 | -1.84702 | 1.822753 | 0.987942 | 0.157707 | 6.188871 |
| ebi-a-GCST90001663 | finngen_R11_C3_OSTEOSARCOMA_EXALLC | Osteosarcoma (controls excluding all cancers) || id:finngen_R11_C3_OSTEOSARCOMA_EXALLC | CD28- CD8dim T cell Absolute Count || id:ebi-a-GCST90001663 | Inverse variance weighted | 2 | 0.937985 | 0.784417 | 0.231785 | -0.59947 | 2.475442 | 2.554829 | 0.549102 | 11.88696 |
| ebi-a-GCST90001664 | finngen_R11_C3_OSTEOSARCOMA_EXALLC | Osteosarcoma (controls excluding all cancers) || id:finngen_R11_C3_OSTEOSARCOMA_EXALLC | CD28+ CD45RA+ CD8dim T cell %T cell || id:ebi-a-GCST90001664 | Inverse variance weighted | 6 | 0.164416 | 0.239157 | 0.491778 | -0.30433 | 0.633164 | 1.178705 | 0.737617 | 1.88356 |
| ebi-a-GCST90001665 | finngen_R11_C3_OSTEOSARCOMA_EXALLC | Osteosarcoma (controls excluding all cancers) || id:finngen_R11_C3_OSTEOSARCOMA_EXALLC | CD28+ CD45RA+ CD8dim T cell %CD8dim T cell || id:ebi-a-GCST90001665 | Inverse variance weighted | 5 | 0.239485 | 0.204786 | 0.242226 | -0.1619 | 0.640864 | 1.270594 | 0.85053 | 1.898121 |
| ebi-a-GCST90001666 | finngen_R11_C3_OSTEOSARCOMA_EXALLC | Osteosarcoma (controls excluding all cancers) || id:finngen_R11_C3_OSTEOSARCOMA_EXALLC | CD28+ CD45RA+ CD8dim T cell Absolute Count || id:ebi-a-GCST90001666 | Inverse variance weighted | 8 | 0.022056 | 0.035447 | 0.533793 | -0.04742 | 0.091532 | 1.022301 | 0.953687 | 1.095852 |
| ebi-a-GCST90001667 | finngen_R11_C3_OSTEOSARCOMA_EXALLC | Osteosarcoma (controls excluding all cancers) || id:finngen_R11_C3_OSTEOSARCOMA_EXALLC | CD28+ CD45RA- CD8dim T cell %T cell || id:ebi-a-GCST90001667 | Inverse variance weighted | 3 | -0.21896 | 0.211323 | 0.300133 | -0.63315 | 0.195231 | 0.803353 | 0.530915 | 1.215591 |
| ebi-a-GCST90001668 | finngen_R11_C3_OSTEOSARCOMA_EXALLC | Osteosarcoma (controls excluding all cancers) || id:finngen_R11_C3_OSTEOSARCOMA_EXALLC | CD28+ CD45RA- CD8dim T cell %CD8dim T cell || id:ebi-a-GCST90001668 | Inverse variance weighted | 2 | -0.32801 | 0.231484 | 0.156489 | -0.78172 | 0.125701 | 0.720357 | 0.45762 | 1.133943 |
| ebi-a-GCST90001669 | finngen_R11_C3_OSTEOSARCOMA_EXALLC | Osteosarcoma (controls excluding all cancers) || id:finngen_R11_C3_OSTEOSARCOMA_EXALLC | CD28+ CD45RA- CD8dim T cell Absolute Count || id:ebi-a-GCST90001669 | Inverse variance weighted | 3 | -0.27939 | 0.22326 | 0.210779 | -0.71698 | 0.158196 | 0.756242 | 0.488223 | 1.171396 |
| ebi-a-GCST90001670 | finngen_R11_C3_OSTEOSARCOMA_EXALLC | Osteosarcoma (controls excluding all cancers) || id:finngen_R11_C3_OSTEOSARCOMA_EXALLC | CD39+ CD8+ T cell %T cell || id:ebi-a-GCST90001670 | Inverse variance weighted | 8 | -0.05604 | 0.149851 | 0.708424 | -0.34975 | 0.237668 | 0.945501 | 0.704865 | 1.268288 |
| ebi-a-GCST90001671 | finngen_R11_C3_OSTEOSARCOMA_EXALLC | Osteosarcoma (controls excluding all cancers) || id:finngen_R11_C3_OSTEOSARCOMA_EXALLC | CD39+ CD8+ T cell %CD8+ T cell || id:ebi-a-GCST90001671 | Inverse variance weighted | 7 | 0.072028 | 0.339459 | 0.831964 | -0.59331 | 0.737368 | 1.074685 | 0.552494 | 2.090426 |
| ebi-a-GCST90001672 | finngen_R11_C3_OSTEOSARCOMA_EXALLC | Osteosarcoma (controls excluding all cancers) || id:finngen_R11_C3_OSTEOSARCOMA_EXALLC | CD39+ CD8+ T cell Absolute Count || id:ebi-a-GCST90001672 | Inverse variance weighted | 7 | -0.04295 | 0.150197 | 0.774894 | -0.33734 | 0.251433 | 0.957956 | 0.713667 | 1.285866 |
| ebi-a-GCST90001679 | finngen_R11_C3_OSTEOSARCOMA_EXALLC | Osteosarcoma (controls excluding all cancers) || id:finngen_R11_C3_OSTEOSARCOMA_EXALLC | CD25++ CD8+ T cell %T cell || id:ebi-a-GCST90001679 | Inverse variance weighted | 2 | 0.182357 | 0.521787 | 0.726725 | -0.84035 | 1.205059 | 1.200043 | 0.431561 | 3.336957 |
| ebi-a-GCST90001681 | finngen_R11_C3_OSTEOSARCOMA_EXALLC | Osteosarcoma (controls excluding all cancers) || id:finngen_R11_C3_OSTEOSARCOMA_EXALLC | CD25++ CD8+ T cell Absolute Count || id:ebi-a-GCST90001681 | Inverse variance weighted | 3 | -0.57331 | 0.733717 | 0.434578 | -2.0114 | 0.864771 | 0.563655 | 0.133801 | 2.374463 |
| ebi-a-GCST90001686 | finngen_R11_C3_OSTEOSARCOMA_EXALLC | Osteosarcoma (controls excluding all cancers) || id:finngen_R11_C3_OSTEOSARCOMA_EXALLC | CD28- CD8+ T cell %CD8+ T cell || id:ebi-a-GCST90001686 | Inverse variance weighted | 3 | -0.27976 | 0.78146 | 0.720348 | -1.81142 | 1.251904 | 0.755967 | 0.163422 | 3.496996 |
| ebi-a-GCST90001687 | finngen_R11_C3_OSTEOSARCOMA_EXALLC | Osteosarcoma (controls excluding all cancers) || id:finngen_R11_C3_OSTEOSARCOMA_EXALLC | CD28- CD8+ T cell Absolute Count || id:ebi-a-GCST90001687 | Inverse variance weighted | 3 | -0.13821 | 0.730149 | 0.849863 | -1.56931 | 1.292881 | 0.870914 | 0.20819 | 3.643267 |
| ebi-a-GCST90001688 | finngen_R11_C3_OSTEOSARCOMA_EXALLC | Osteosarcoma (controls excluding all cancers) || id:finngen_R11_C3_OSTEOSARCOMA_EXALLC | CD28+ CD45RA+ CD8+ T cell %T cell || id:ebi-a-GCST90001688 | Inverse variance weighted | 37 | -0.02274 | 0.01894 | 0.229885 | -0.05986 | 0.014382 | 0.977517 | 0.941895 | 1.014486 |
| ebi-a-GCST90001690 | finngen_R11_C3_OSTEOSARCOMA_EXALLC | Osteosarcoma (controls excluding all cancers) || id:finngen_R11_C3_OSTEOSARCOMA_EXALLC | CD28+ CD45RA+ CD8+ T cell Absolute Count || id:ebi-a-GCST90001690 | Inverse variance weighted (multiplicative random effects) | 3 | 0.205233 | 1.690413 | 0.903366 | -3.10798 | 3.518444 | 1.227812 | 0.044691 | 33.73189 |
| ebi-a-GCST90001691 | finngen_R11_C3_OSTEOSARCOMA_EXALLC | Osteosarcoma (controls excluding all cancers) || id:finngen_R11_C3_OSTEOSARCOMA_EXALLC | CD28+ CD45RA- CD8+ T cell %T cell || id:ebi-a-GCST90001691 | Inverse variance weighted | 3 | 0.057547 | 0.269498 | 0.83091 | -0.47067 | 0.585763 | 1.059235 | 0.624584 | 1.796361 |
| ebi-a-GCST90001692 | finngen_R11_C3_OSTEOSARCOMA_EXALLC | Osteosarcoma (controls excluding all cancers) || id:finngen_R11_C3_OSTEOSARCOMA_EXALLC | CD28+ CD45RA- CD8+ T cell %CD8+ T cell || id:ebi-a-GCST90001692 | Inverse variance weighted | 3 | -0.29787 | 0.215708 | 0.167317 | -0.72065 | 0.124921 | 0.742401 | 0.486435 | 1.133059 |
| ebi-a-GCST90001693 | finngen_R11_C3_OSTEOSARCOMA_EXALLC | Osteosarcoma (controls excluding all cancers) || id:finngen_R11_C3_OSTEOSARCOMA_EXALLC | CD28+ CD45RA- CD8+ T cell Absolute Count || id:ebi-a-GCST90001693 | Inverse variance weighted | 2 | -0.28426 | 0.238259 | 0.232842 | -0.75125 | 0.182728 | 0.752571 | 0.471778 | 1.200487 |
| ebi-a-GCST90001694 | finngen_R11_C3_OSTEOSARCOMA_EXALLC | Osteosarcoma (controls excluding all cancers) || id:finngen_R11_C3_OSTEOSARCOMA_EXALLC | CD28- CD4-CD8- T cell %T cell || id:ebi-a-GCST90001694 | Inverse variance weighted | 3 | 0.976468 | 1.116728 | 0.3819 | -1.21232 | 3.165255 | 2.655063 | 0.297507 | 23.69478 |
| ebi-a-GCST90001695 | finngen_R11_C3_OSTEOSARCOMA_EXALLC | Osteosarcoma (controls excluding all cancers) || id:finngen_R11_C3_OSTEOSARCOMA_EXALLC | CD45RA- CD28- CD8+ T cell Absolute Count || id:ebi-a-GCST90001695 | Inverse variance weighted | 144 | -0.00021 | 9.39E-05 | 0.02665 | -0.00039 | -2.41E-05 | 0.999792 | 0.999608 | 0.999976 |
| ebi-a-GCST90001696 | finngen_R11_C3_OSTEOSARCOMA_EXALLC | Osteosarcoma (controls excluding all cancers) || id:finngen_R11_C3_OSTEOSARCOMA_EXALLC | CD45RA- CD28- CD8+ T cell %CD8+ T cell || id:ebi-a-GCST90001696 | Inverse variance weighted | 10 | 0.004113 | 0.008785 | 0.639654 | -0.01311 | 0.021333 | 1.004122 | 0.986979 | 1.021562 |
| ebi-a-GCST90001697 | finngen_R11_C3_OSTEOSARCOMA_EXALLC | Osteosarcoma (controls excluding all cancers) || id:finngen_R11_C3_OSTEOSARCOMA_EXALLC | CD45RA- CD28- CD8+ T cell %T cell || id:ebi-a-GCST90001697 | Inverse variance weighted | 41 | -0.00276 | 0.003972 | 0.487212 | -0.01054 | 0.005025 | 0.997245 | 0.989512 | 1.005038 |
| ebi-a-GCST90001698 | finngen_R11_C3_OSTEOSARCOMA_EXALLC | Osteosarcoma (controls excluding all cancers) || id:finngen_R11_C3_OSTEOSARCOMA_EXALLC | CD45RA+ CD28- CD8+ T cell Absolute Count || id:ebi-a-GCST90001698 | Inverse variance weighted | 428 | 6.94E-05 | 4.77E-05 | 0.145824 | -2.41E-05 | 0.000163 | 1.000069 | 0.999976 | 1.000163 |
| ebi-a-GCST90001700 | finngen_R11_C3_OSTEOSARCOMA_EXALLC | Osteosarcoma (controls excluding all cancers) || id:finngen_R11_C3_OSTEOSARCOMA_EXALLC | CD45RA+ CD28- CD8+ T cell %T cell || id:ebi-a-GCST90001700 | Inverse variance weighted | 65 | 0.000508 | 0.002184 | 0.816035 | -0.00377 | 0.004788 | 1.000508 | 0.996235 | 1.0048 |
| ebi-a-GCST90001702 | finngen_R11_C3_OSTEOSARCOMA_EXALLC | Osteosarcoma (controls excluding all cancers) || id:finngen_R11_C3_OSTEOSARCOMA_EXALLC | BAFF-R on CD24+ CD27+ B cell || id:ebi-a-GCST90001702 | Inverse variance weighted | 9 | -0.43928 | 0.17687 | 0.013005 | -0.78594 | -0.09261 | 0.644501 | 0.455689 | 0.911546 |
| ebi-a-GCST90001703 | finngen_R11_C3_OSTEOSARCOMA_EXALLC | Osteosarcoma (controls excluding all cancers) || id:finngen_R11_C3_OSTEOSARCOMA_EXALLC | BAFF-R on IgD+ CD24+ B cell || id:ebi-a-GCST90001703 | Inverse variance weighted | 7 | -0.40312 | 0.180814 | 0.02578 | -0.75752 | -0.04873 | 0.668229 | 0.468828 | 0.952438 |
| ebi-a-GCST90001704 | finngen_R11_C3_OSTEOSARCOMA_EXALLC | Osteosarcoma (controls excluding all cancers) || id:finngen_R11_C3_OSTEOSARCOMA_EXALLC | BAFF-R on IgD+ CD24- B cell || id:ebi-a-GCST90001704 | Inverse variance weighted | 10 | -0.21021 | 0.184637 | 0.254916 | -0.5721 | 0.151681 | 0.810416 | 0.564342 | 1.163789 |
| ebi-a-GCST90001705 | finngen_R11_C3_OSTEOSARCOMA_EXALLC | Osteosarcoma (controls excluding all cancers) || id:finngen_R11_C3_OSTEOSARCOMA_EXALLC | BAFF-R on IgD+ CD38- B cell || id:ebi-a-GCST90001705 | Inverse variance weighted | 9 | -0.18674 | 0.192978 | 0.333206 | -0.56498 | 0.191496 | 0.829659 | 0.568373 | 1.211061 |
| ebi-a-GCST90001706 | finngen_R11_C3_OSTEOSARCOMA_EXALLC | Osteosarcoma (controls excluding all cancers) || id:finngen_R11_C3_OSTEOSARCOMA_EXALLC | BAFF-R on IgD+ CD38- naive B cell || id:ebi-a-GCST90001706 | Inverse variance weighted | 8 | -0.19232 | 0.198797 | 0.333331 | -0.58196 | 0.19732 | 0.825042 | 0.5588 | 1.218134 |
| ebi-a-GCST90001707 | finngen_R11_C3_OSTEOSARCOMA_EXALLC | Osteosarcoma (controls excluding all cancers) || id:finngen_R11_C3_OSTEOSARCOMA_EXALLC | BAFF-R on IgD+ CD38- unswitched memory B cell || id:ebi-a-GCST90001707 | Inverse variance weighted | 7 | -0.43574 | 0.184339 | 0.018089 | -0.79704 | -0.07443 | 0.646787 | 0.45066 | 0.928268 |
| ebi-a-GCST90001708 | finngen_R11_C3_OSTEOSARCOMA_EXALLC | Osteosarcoma (controls excluding all cancers) || id:finngen_R11_C3_OSTEOSARCOMA_EXALLC | BAFF-R on IgD+ CD38+ B cell || id:ebi-a-GCST90001708 | Inverse variance weighted | 10 | -0.21482 | 0.193899 | 0.267918 | -0.59486 | 0.165227 | 0.80669 | 0.551641 | 1.179661 |
| ebi-a-GCST90001709 | finngen_R11_C3_OSTEOSARCOMA_EXALLC | Osteosarcoma (controls excluding all cancers) || id:finngen_R11_C3_OSTEOSARCOMA_EXALLC | BAFF-R on IgD+ CD38dim B cell || id:ebi-a-GCST90001709 | Inverse variance weighted | 10 | -0.20797 | 0.184784 | 0.26039 | -0.57014 | 0.154208 | 0.812233 | 0.565444 | 1.166733 |
| ebi-a-GCST90001710 | finngen_R11_C3_OSTEOSARCOMA_EXALLC | Osteosarcoma (controls excluding all cancers) || id:finngen_R11_C3_OSTEOSARCOMA_EXALLC | BAFF-R on IgD- CD24- B cell || id:ebi-a-GCST90001710 | Inverse variance weighted | 9 | -0.5199 | 0.188035 | 0.005694 | -0.88845 | -0.15135 | 0.594578 | 0.411292 | 0.859544 |
| ebi-a-GCST90001711 | finngen_R11_C3_OSTEOSARCOMA_EXALLC | Osteosarcoma (controls excluding all cancers) || id:finngen_R11_C3_OSTEOSARCOMA_EXALLC | BAFF-R on IgD- CD27- B cell || id:ebi-a-GCST90001711 | Inverse variance weighted | 9 | -0.51736 | 0.186766 | 0.005604 | -0.88342 | -0.15129 | 0.596095 | 0.413368 | 0.859595 |
| ebi-a-GCST90001712 | finngen_R11_C3_OSTEOSARCOMA_EXALLC | Osteosarcoma (controls excluding all cancers) || id:finngen_R11_C3_OSTEOSARCOMA_EXALLC | BAFF-R on IgD- CD38- B cell || id:ebi-a-GCST90001712 | Inverse variance weighted | 7 | -0.39742 | 0.181174 | 0.028265 | -0.75252 | -0.04232 | 0.672051 | 0.471176 | 0.958562 |
| ebi-a-GCST90001713 | finngen_R11_C3_OSTEOSARCOMA_EXALLC | Osteosarcoma (controls excluding all cancers) || id:finngen_R11_C3_OSTEOSARCOMA_EXALLC | BAFF-R on IgD- CD38+ B cell || id:ebi-a-GCST90001713 | Inverse variance weighted | 3 | -0.97924 | 0.499523 | 0.049955 | -1.9583 | -0.00017 | 0.375597 | 0.141097 | 0.999825 |
| ebi-a-GCST90001715 | finngen_R11_C3_OSTEOSARCOMA_EXALLC | Osteosarcoma (controls excluding all cancers) || id:finngen_R11_C3_OSTEOSARCOMA_EXALLC | BAFF-R on memory B cell || id:ebi-a-GCST90001715 | Inverse variance weighted | 9 | -0.4437 | 0.177441 | 0.012401 | -0.79148 | -0.09591 | 0.641661 | 0.453174 | 0.908545 |
| ebi-a-GCST90001716 | finngen_R11_C3_OSTEOSARCOMA_EXALLC | Osteosarcoma (controls excluding all cancers) || id:finngen_R11_C3_OSTEOSARCOMA_EXALLC | BAFF-R on naive-mature B cell || id:ebi-a-GCST90001716 | Inverse variance weighted | 10 | -0.20997 | 0.18595 | 0.25883 | -0.57443 | 0.154495 | 0.810611 | 0.563026 | 1.167068 |
| ebi-a-GCST90001717 | finngen_R11_C3_OSTEOSARCOMA_EXALLC | Osteosarcoma (controls excluding all cancers) || id:finngen_R11_C3_OSTEOSARCOMA_EXALLC | BAFF-R on unswitched memory B cell || id:ebi-a-GCST90001717 | Inverse variance weighted | 9 | -0.44561 | 0.177092 | 0.01186 | -0.79271 | -0.09851 | 0.640433 | 0.452617 | 0.906186 |
| ebi-a-GCST90001718 | finngen_R11_C3_OSTEOSARCOMA_EXALLC | Osteosarcoma (controls excluding all cancers) || id:finngen_R11_C3_OSTEOSARCOMA_EXALLC | BAFF-R on switched memory B cell || id:ebi-a-GCST90001718 | Inverse variance weighted | 10 | -0.46453 | 0.176805 | 0.008604 | -0.81107 | -0.118 | 0.628428 | 0.444382 | 0.888699 |
| ebi-a-GCST90001719 | finngen_R11_C3_OSTEOSARCOMA_EXALLC | Osteosarcoma (controls excluding all cancers) || id:finngen_R11_C3_OSTEOSARCOMA_EXALLC | BAFF-R on IgD+ B cell || id:ebi-a-GCST90001719 | Inverse variance weighted | 10 | -0.24609 | 0.190072 | 0.195416 | -0.61863 | 0.126451 | 0.781851 | 0.538681 | 1.134794 |
| ebi-a-GCST90001720 | finngen_R11_C3_OSTEOSARCOMA_EXALLC | Osteosarcoma (controls excluding all cancers) || id:finngen_R11_C3_OSTEOSARCOMA_EXALLC | BAFF-R on transitional B cell || id:ebi-a-GCST90001720 | Inverse variance weighted | 8 | -0.18929 | 0.212505 | 0.373062 | -0.6058 | 0.22722 | 0.827547 | 0.545638 | 1.255107 |
| ebi-a-GCST90001723 | finngen_R11_C3_OSTEOSARCOMA_EXALLC | Osteosarcoma (controls excluding all cancers) || id:finngen_R11_C3_OSTEOSARCOMA_EXALLC | CD19 on CD24+ CD27+ B cell || id:ebi-a-GCST90001723 | Inverse variance weighted | 3 | -0.73119 | 0.34578 | 0.034463 | -1.40892 | -0.05346 | 0.481335 | 0.244407 | 0.947942 |
| ebi-a-GCST90001724 | finngen_R11_C3_OSTEOSARCOMA_EXALLC | Osteosarcoma (controls excluding all cancers) || id:finngen_R11_C3_OSTEOSARCOMA_EXALLC | CD19 on IgD+ CD24+ B cell || id:ebi-a-GCST90001724 | Inverse variance weighted | 4 | -0.5297 | 0.400283 | 0.185734 | -1.31425 | 0.254859 | 0.588784 | 0.268675 | 1.290279 |
| ebi-a-GCST90001725 | finngen_R11_C3_OSTEOSARCOMA_EXALLC | Osteosarcoma (controls excluding all cancers) || id:finngen_R11_C3_OSTEOSARCOMA_EXALLC | CD19 on IgD+ CD24- B cell || id:ebi-a-GCST90001725 | Inverse variance weighted | 4 | -0.57938 | 0.481771 | 0.229129 | -1.52365 | 0.36489 | 0.560246 | 0.217915 | 1.440356 |
| ebi-a-GCST90001728 | finngen_R11_C3_OSTEOSARCOMA_EXALLC | Osteosarcoma (controls excluding all cancers) || id:finngen_R11_C3_OSTEOSARCOMA_EXALLC | CD19 on IgD+ CD38- unswitched memory B cell || id:ebi-a-GCST90001728 | Inverse variance weighted | 3 | 0.531649 | 0.593315 | 0.370218 | -0.63125 | 1.694547 | 1.701736 | 0.531927 | 5.444179 |
| ebi-a-GCST90001729 | finngen_R11_C3_OSTEOSARCOMA_EXALLC | Osteosarcoma (controls excluding all cancers) || id:finngen_R11_C3_OSTEOSARCOMA_EXALLC | CD19 on IgD+ CD38+ B cell || id:ebi-a-GCST90001729 | Inverse variance weighted | 4 | -0.37763 | 0.388397 | 0.33091 | -1.13889 | 0.383626 | 0.685483 | 0.320175 | 1.467596 |
| ebi-a-GCST90001730 | finngen_R11_C3_OSTEOSARCOMA_EXALLC | Osteosarcoma (controls excluding all cancers) || id:finngen_R11_C3_OSTEOSARCOMA_EXALLC | CD19 on IgD+ CD38dim B cell || id:ebi-a-GCST90001730 | Inverse variance weighted | 4 | -0.45703 | 0.452329 | 0.31231 | -1.34359 | 0.429538 | 0.633163 | 0.260907 | 1.536548 |
| ebi-a-GCST90001735 | finngen_R11_C3_OSTEOSARCOMA_EXALLC | Osteosarcoma (controls excluding all cancers) || id:finngen_R11_C3_OSTEOSARCOMA_EXALLC | CD19 on IgD- CD38dim B cell || id:ebi-a-GCST90001735 | Inverse variance weighted | 4 | -0.64098 | 0.323348 | 0.047442 | -1.27475 | -0.00722 | 0.526775 | 0.279502 | 0.992806 |
| ebi-a-GCST90001736 | finngen_R11_C3_OSTEOSARCOMA_EXALLC | Osteosarcoma (controls excluding all cancers) || id:finngen_R11_C3_OSTEOSARCOMA_EXALLC | CD19 on memory B cell || id:ebi-a-GCST90001736 | Inverse variance weighted | 3 | -0.82108 | 0.387489 | 0.034092 | -1.58056 | -0.0616 | 0.439956 | 0.20586 | 0.940256 |
| ebi-a-GCST90001737 | finngen_R11_C3_OSTEOSARCOMA_EXALLC | Osteosarcoma (controls excluding all cancers) || id:finngen_R11_C3_OSTEOSARCOMA_EXALLC | CD19 on naive-mature B cell || id:ebi-a-GCST90001737 | Inverse variance weighted | 2 | 0.12003 | 2.168428 | 0.955857 | -4.13009 | 4.37015 | 1.127531 | 0.016081 | 79.05547 |
| ebi-a-GCST90001738 | finngen_R11_C3_OSTEOSARCOMA_EXALLC | Osteosarcoma (controls excluding all cancers) || id:finngen_R11_C3_OSTEOSARCOMA_EXALLC | CD19 on unswitched memory B cell || id:ebi-a-GCST90001738 | Inverse variance weighted | 4 | -0.46683 | 0.434441 | 0.282577 | -1.31833 | 0.384677 | 0.626989 | 0.267582 | 1.469139 |
| ebi-a-GCST90001740 | finngen_R11_C3_OSTEOSARCOMA_EXALLC | Osteosarcoma (controls excluding all cancers) || id:finngen_R11_C3_OSTEOSARCOMA_EXALLC | CD19 on switched memory B cell || id:ebi-a-GCST90001740 | Inverse variance weighted | 2 | -0.03783 | 0.978756 | 0.969172 | -1.95619 | 1.880536 | 0.96288 | 0.141396 | 6.557018 |
| ebi-a-GCST90001741 | finngen_R11_C3_OSTEOSARCOMA_EXALLC | Osteosarcoma (controls excluding all cancers) || id:finngen_R11_C3_OSTEOSARCOMA_EXALLC | CD19 on IgD+ B cell || id:ebi-a-GCST90001741 | Inverse variance weighted | 2 | 0.87211 | 1.117613 | 0.435195 | -1.31841 | 3.062633 | 2.391953 | 0.26756 | 21.38378 |
| ebi-a-GCST90001742 | finngen_R11_C3_OSTEOSARCOMA_EXALLC | Osteosarcoma (controls excluding all cancers) || id:finngen_R11_C3_OSTEOSARCOMA_EXALLC | CD19 on transitional B cell || id:ebi-a-GCST90001742 | Inverse variance weighted | 4 | -0.43355 | 0.430394 | 0.31378 | -1.27712 | 0.410026 | 0.648207 | 0.27884 | 1.506858 |
| ebi-a-GCST90001743 | finngen_R11_C3_OSTEOSARCOMA_EXALLC | Osteosarcoma (controls excluding all cancers) || id:finngen_R11_C3_OSTEOSARCOMA_EXALLC | CD20 on B cell || id:ebi-a-GCST90001743 | Inverse variance weighted | 4 | -0.82555 | 0.491091 | 0.092751 | -1.78809 | 0.136985 | 0.437993 | 0.167279 | 1.146811 |
| ebi-a-GCST90001745 | finngen_R11_C3_OSTEOSARCOMA_EXALLC | Osteosarcoma (controls excluding all cancers) || id:finngen_R11_C3_OSTEOSARCOMA_EXALLC | CD20 on CD24+ CD27+ B cell || id:ebi-a-GCST90001745 | Inverse variance weighted | 5 | -1.33993 | 0.556471 | 0.016045 | -2.43061 | -0.24924 | 0.261865 | 0.087983 | 0.779392 |
| ebi-a-GCST90001746 | finngen_R11_C3_OSTEOSARCOMA_EXALLC | Osteosarcoma (controls excluding all cancers) || id:finngen_R11_C3_OSTEOSARCOMA_EXALLC | CD20 on IgD+ CD24+ B cell || id:ebi-a-GCST90001746 | Inverse variance weighted | 2 | -1.21011 | 0.87929 | 0.16875 | -2.93352 | 0.513302 | 0.298165 | 0.05321 | 1.670799 |
| ebi-a-GCST90001747 | finngen_R11_C3_OSTEOSARCOMA_EXALLC | Osteosarcoma (controls excluding all cancers) || id:finngen_R11_C3_OSTEOSARCOMA_EXALLC | CD20 on IgD+ CD24- B cell || id:ebi-a-GCST90001747 | Inverse variance weighted | 4 | -0.29844 | 0.489917 | 0.542411 | -1.25868 | 0.661794 | 0.741972 | 0.284029 | 1.938266 |
| ebi-a-GCST90001748 | finngen_R11_C3_OSTEOSARCOMA_EXALLC | Osteosarcoma (controls excluding all cancers) || id:finngen_R11_C3_OSTEOSARCOMA_EXALLC | CD20 on IgD+ CD38- B cell || id:ebi-a-GCST90001748 | Inverse variance weighted | 4 | -1.57101 | 0.633893 | 0.013199 | -2.81344 | -0.32858 | 0.207834 | 0.059998 | 0.719943 |
| ebi-a-GCST90001751 | finngen_R11_C3_OSTEOSARCOMA_EXALLC | Osteosarcoma (controls excluding all cancers) || id:finngen_R11_C3_OSTEOSARCOMA_EXALLC | CD20 on IgD+ CD38+ B cell || id:ebi-a-GCST90001751 | Inverse variance weighted | 5 | -0.14518 | 0.433259 | 0.737551 | -0.99437 | 0.704003 | 0.864863 | 0.369956 | 2.021829 |
| ebi-a-GCST90001752 | finngen_R11_C3_OSTEOSARCOMA_EXALLC | Osteosarcoma (controls excluding all cancers) || id:finngen_R11_C3_OSTEOSARCOMA_EXALLC | CD20 on IgD+ CD38dim B cell || id:ebi-a-GCST90001752 | Inverse variance weighted | 7 | -0.34779 | 0.370307 | 0.347624 | -1.0736 | 0.378006 | 0.706244 | 0.341777 | 1.459372 |
| ebi-a-GCST90001753 | finngen_R11_C3_OSTEOSARCOMA_EXALLC | Osteosarcoma (controls excluding all cancers) || id:finngen_R11_C3_OSTEOSARCOMA_EXALLC | CD20 on IgD- CD24- B cell || id:ebi-a-GCST90001753 | Inverse variance weighted | 2 | -0.89887 | 1.371392 | 0.512181 | -3.5868 | 1.789056 | 0.407028 | 0.027687 | 5.983802 |
| ebi-a-GCST90001754 | finngen_R11_C3_OSTEOSARCOMA_EXALLC | Osteosarcoma (controls excluding all cancers) || id:finngen_R11_C3_OSTEOSARCOMA_EXALLC | CD20 on IgD- CD27- B cell || id:ebi-a-GCST90001754 | Inverse variance weighted | 4 | -0.88245 | 0.596411 | 0.138982 | -2.05141 | 0.286519 | 0.41377 | 0.128553 | 1.331784 |
| ebi-a-GCST90001755 | finngen_R11_C3_OSTEOSARCOMA_EXALLC | Osteosarcoma (controls excluding all cancers) || id:finngen_R11_C3_OSTEOSARCOMA_EXALLC | CD20 on IgD- CD38- B cell || id:ebi-a-GCST90001755 | Inverse variance weighted | 4 | -1.477 | 1.026861 | 0.15033 | -3.48965 | 0.535646 | 0.228321 | 0.030512 | 1.708551 |
| ebi-a-GCST90001757 | finngen_R11_C3_OSTEOSARCOMA_EXALLC | Osteosarcoma (controls excluding all cancers) || id:finngen_R11_C3_OSTEOSARCOMA_EXALLC | CD20 on IgD- CD38dim B cell || id:ebi-a-GCST90001757 | Inverse variance weighted | 7 | -0.61066 | 0.473422 | 0.197087 | -1.53857 | 0.317242 | 0.54299 | 0.214687 | 1.373335 |
| ebi-a-GCST90001758 | finngen_R11_C3_OSTEOSARCOMA_EXALLC | Osteosarcoma (controls excluding all cancers) || id:finngen_R11_C3_OSTEOSARCOMA_EXALLC | CD20 on memory B cell || id:ebi-a-GCST90001758 | Inverse variance weighted | 5 | -1.21954 | 0.538473 | 0.023524 | -2.27495 | -0.16413 | 0.295365 | 0.102802 | 0.848628 |
| ebi-a-GCST90001759 | finngen_R11_C3_OSTEOSARCOMA_EXALLC | Osteosarcoma (controls excluding all cancers) || id:finngen_R11_C3_OSTEOSARCOMA_EXALLC | CD20 on naive-mature B cell || id:ebi-a-GCST90001759 | Inverse variance weighted | 6 | -0.68696 | 0.432917 | 0.112556 | -1.53547 | 0.161561 | 0.503105 | 0.215354 | 1.175345 |
| ebi-a-GCST90001760 | finngen_R11_C3_OSTEOSARCOMA_EXALLC | Osteosarcoma (controls excluding all cancers) || id:finngen_R11_C3_OSTEOSARCOMA_EXALLC | CD20 on unswitched memory B cell || id:ebi-a-GCST90001760 | Inverse variance weighted | 4 | -1.11052 | 0.604448 | 0.066174 | -2.29523 | 0.074201 | 0.329389 | 0.100738 | 1.077024 |
| ebi-a-GCST90001761 | finngen_R11_C3_OSTEOSARCOMA_EXALLC | Osteosarcoma (controls excluding all cancers) || id:finngen_R11_C3_OSTEOSARCOMA_EXALLC | CD20 on switched memory B cell || id:ebi-a-GCST90001761 | Inverse variance weighted | 7 | -0.76737 | 0.523 | 0.142311 | -1.79245 | 0.257714 | 0.464234 | 0.166552 | 1.293969 |
| ebi-a-GCST90001762 | finngen_R11_C3_OSTEOSARCOMA_EXALLC | Osteosarcoma (controls excluding all cancers) || id:finngen_R11_C3_OSTEOSARCOMA_EXALLC | CD20 on IgD+ B cell || id:ebi-a-GCST90001762 | Inverse variance weighted | 5 | -0.65663 | 0.447959 | 0.142696 | -1.53463 | 0.22137 | 0.518596 | 0.215536 | 1.247785 |
| ebi-a-GCST90001763 | finngen_R11_C3_OSTEOSARCOMA_EXALLC | Osteosarcoma (controls excluding all cancers) || id:finngen_R11_C3_OSTEOSARCOMA_EXALLC | CD20 on transitional B cell || id:ebi-a-GCST90001763 | Inverse variance weighted | 2 | -0.12706 | 0.588229 | 0.828988 | -1.27999 | 1.025871 | 0.880684 | 0.278041 | 2.789525 |
| ebi-a-GCST90001765 | finngen_R11_C3_OSTEOSARCOMA_EXALLC | Osteosarcoma (controls excluding all cancers) || id:finngen_R11_C3_OSTEOSARCOMA_EXALLC | CD24 on IgD+ CD24+ B cell || id:ebi-a-GCST90001765 | Inverse variance weighted | 2 | -0.11819 | 0.357717 | 0.741091 | -0.81932 | 0.582932 | 0.888525 | 0.440732 | 1.791283 |
| ebi-a-GCST90001766 | finngen_R11_C3_OSTEOSARCOMA_EXALLC | Osteosarcoma (controls excluding all cancers) || id:finngen_R11_C3_OSTEOSARCOMA_EXALLC | CD24 on IgD+ CD38- B cell || id:ebi-a-GCST90001766 | Inverse variance weighted | 2 | -0.25175 | 0.575343 | 0.661698 | -1.37942 | 0.875919 | 0.777437 | 0.251723 | 2.40108 |
| ebi-a-GCST90001767 | finngen_R11_C3_OSTEOSARCOMA_EXALLC | Osteosarcoma (controls excluding all cancers) || id:finngen_R11_C3_OSTEOSARCOMA_EXALLC | CD24 on IgD+ CD38- unswitched memory B cell || id:ebi-a-GCST90001767 | Inverse variance weighted | 2 | -0.1149 | 0.315024 | 0.715301 | -0.73235 | 0.502544 | 0.891452 | 0.480777 | 1.652921 |
| ebi-a-GCST90001768 | finngen_R11_C3_OSTEOSARCOMA_EXALLC | Osteosarcoma (controls excluding all cancers) || id:finngen_R11_C3_OSTEOSARCOMA_EXALLC | CD24 on IgD+ CD38+ B cell || id:ebi-a-GCST90001768 | Inverse variance weighted | 2 | 0.304453 | 1.022175 | 0.765819 | -1.69901 | 2.307917 | 1.355883 | 0.182864 | 10.05346 |
| ebi-a-GCST90001769 | finngen_R11_C3_OSTEOSARCOMA_EXALLC | Osteosarcoma (controls excluding all cancers) || id:finngen_R11_C3_OSTEOSARCOMA_EXALLC | CD24 on IgD- CD38- B cell || id:ebi-a-GCST90001769 | Inverse variance weighted | 2 | -0.20998 | 0.46321 | 0.650328 | -1.11787 | 0.697915 | 0.810604 | 0.326977 | 2.009559 |
| ebi-a-GCST90001771 | finngen_R11_C3_OSTEOSARCOMA_EXALLC | Osteosarcoma (controls excluding all cancers) || id:finngen_R11_C3_OSTEOSARCOMA_EXALLC | CD24 on memory B cell || id:ebi-a-GCST90001771 | Inverse variance weighted | 2 | -0.42768 | 0.544026 | 0.431787 | -1.49397 | 0.638612 | 0.65202 | 0.224479 | 1.893851 |
| ebi-a-GCST90001772 | finngen_R11_C3_OSTEOSARCOMA_EXALLC | Osteosarcoma (controls excluding all cancers) || id:finngen_R11_C3_OSTEOSARCOMA_EXALLC | CD24 on unswitched memory B cell || id:ebi-a-GCST90001772 | Inverse variance weighted | 2 | -0.13455 | 0.38873 | 0.729247 | -0.89646 | 0.627361 | 0.874109 | 0.408011 | 1.872662 |
| ebi-a-GCST90001773 | finngen_R11_C3_OSTEOSARCOMA_EXALLC | Osteosarcoma (controls excluding all cancers) || id:finngen_R11_C3_OSTEOSARCOMA_EXALLC | CD24 on switched memory B cell || id:ebi-a-GCST90001773 | Inverse variance weighted | 2 | -0.44454 | 0.567853 | 0.433719 | -1.55753 | 0.668452 | 0.641119 | 0.210655 | 1.951214 |
| ebi-a-GCST90001775 | finngen_R11_C3_OSTEOSARCOMA_EXALLC | Osteosarcoma (controls excluding all cancers) || id:finngen_R11_C3_OSTEOSARCOMA_EXALLC | CD25 on B cell || id:ebi-a-GCST90001775 | Inverse variance weighted | 3 | 0.254126 | 0.509314 | 0.61781 | -0.74413 | 1.252382 | 1.289334 | 0.475147 | 3.498666 |
| ebi-a-GCST90001777 | finngen_R11_C3_OSTEOSARCOMA_EXALLC | Osteosarcoma (controls excluding all cancers) || id:finngen_R11_C3_OSTEOSARCOMA_EXALLC | CD25 on CD24+ CD27+ B cell || id:ebi-a-GCST90001777 | Inverse variance weighted | 4 | 0.354572 | 0.388968 | 0.361995 | -0.40781 | 1.116949 | 1.42557 | 0.665108 | 3.055519 |
| ebi-a-GCST90001778 | finngen_R11_C3_OSTEOSARCOMA_EXALLC | Osteosarcoma (controls excluding all cancers) || id:finngen_R11_C3_OSTEOSARCOMA_EXALLC | CD25 on IgD+ CD24+ B cell || id:ebi-a-GCST90001778 | Inverse variance weighted | 3 | 0.478445 | 0.450234 | 0.287937 | -0.40401 | 1.360905 | 1.613564 | 0.667635 | 3.89972 |
| ebi-a-GCST90001779 | finngen_R11_C3_OSTEOSARCOMA_EXALLC | Osteosarcoma (controls excluding all cancers) || id:finngen_R11_C3_OSTEOSARCOMA_EXALLC | CD25 on IgD+ CD24- B cell || id:ebi-a-GCST90001779 | Inverse variance weighted | 3 | 0.685188 | 0.533147 | 0.198731 | -0.35978 | 1.730156 | 1.984145 | 0.69783 | 5.641532 |
| ebi-a-GCST90001780 | finngen_R11_C3_OSTEOSARCOMA_EXALLC | Osteosarcoma (controls excluding all cancers) || id:finngen_R11_C3_OSTEOSARCOMA_EXALLC | CD25 on IgD+ CD38- B cell || id:ebi-a-GCST90001780 | Inverse variance weighted | 3 | 0.414141 | 0.648905 | 0.523334 | -0.85771 | 1.685995 | 1.51307 | 0.424131 | 5.397817 |
| ebi-a-GCST90001781 | finngen_R11_C3_OSTEOSARCOMA_EXALLC | Osteosarcoma (controls excluding all cancers) || id:finngen_R11_C3_OSTEOSARCOMA_EXALLC | CD25 on IgD+ CD38- naive B cell || id:ebi-a-GCST90001781 | Inverse variance weighted | 3 | 0.562411 | 0.48898 | 0.250073 | -0.39599 | 1.520812 | 1.754899 | 0.673014 | 4.575937 |
| ebi-a-GCST90001783 | finngen_R11_C3_OSTEOSARCOMA_EXALLC | Osteosarcoma (controls excluding all cancers) || id:finngen_R11_C3_OSTEOSARCOMA_EXALLC | CD25 on IgD+ CD38+ B cell || id:ebi-a-GCST90001783 | Inverse variance weighted | 3 | 0.610021 | 0.55429 | 0.271095 | -0.47639 | 1.696428 | 1.840469 | 0.621023 | 5.454432 |
| ebi-a-GCST90001784 | finngen_R11_C3_OSTEOSARCOMA_EXALLC | Osteosarcoma (controls excluding all cancers) || id:finngen_R11_C3_OSTEOSARCOMA_EXALLC | CD25 on IgD+ CD38dim B cell || id:ebi-a-GCST90001784 | Inverse variance weighted | 2 | 1.160074 | 0.725202 | 0.109675 | -0.26132 | 2.581469 | 3.190168 | 0.770033 | 13.21654 |
| ebi-a-GCST90001785 | finngen_R11_C3_OSTEOSARCOMA_EXALLC | Osteosarcoma (controls excluding all cancers) || id:finngen_R11_C3_OSTEOSARCOMA_EXALLC | CD25 on IgD- CD24- B cell || id:ebi-a-GCST90001785 | Inverse variance weighted | 2 | 0.990379 | 1.008808 | 0.326232 | -0.98688 | 2.967642 | 2.692255 | 0.372736 | 19.44601 |
| ebi-a-GCST90001786 | finngen_R11_C3_OSTEOSARCOMA_EXALLC | Osteosarcoma (controls excluding all cancers) || id:finngen_R11_C3_OSTEOSARCOMA_EXALLC | CD25 on IgD- CD27- B cell || id:ebi-a-GCST90001786 | Inverse variance weighted | 2 | 0.570327 | 0.797039 | 0.474265 | -0.99187 | 2.132523 | 1.768846 | 0.370883 | 8.436122 |
| ebi-a-GCST90001787 | finngen_R11_C3_OSTEOSARCOMA_EXALLC | Osteosarcoma (controls excluding all cancers) || id:finngen_R11_C3_OSTEOSARCOMA_EXALLC | CD25 on IgD- CD38- B cell || id:ebi-a-GCST90001787 | Inverse variance weighted | 3 | 0.663354 | 0.524214 | 0.205719 | -0.36411 | 1.690814 | 1.941293 | 0.694818 | 5.423895 |
| ebi-a-GCST90001789 | finngen_R11_C3_OSTEOSARCOMA_EXALLC | Osteosarcoma (controls excluding all cancers) || id:finngen_R11_C3_OSTEOSARCOMA_EXALLC | CD25 on IgD- CD38dim B cell || id:ebi-a-GCST90001789 | Inverse variance weighted | 3 | 0.414022 | 0.537031 | 0.440739 | -0.63856 | 1.466603 | 1.51289 | 0.528053 | 4.334485 |
| ebi-a-GCST90001790 | finngen_R11_C3_OSTEOSARCOMA_EXALLC | Osteosarcoma (controls excluding all cancers) || id:finngen_R11_C3_OSTEOSARCOMA_EXALLC | CD25 on memory B cell || id:ebi-a-GCST90001790 | Inverse variance weighted | 4 | 0.364645 | 0.394359 | 0.355146 | -0.4083 | 1.137588 | 1.440003 | 0.664781 | 3.119236 |
| ebi-a-GCST90001791 | finngen_R11_C3_OSTEOSARCOMA_EXALLC | Osteosarcoma (controls excluding all cancers) || id:finngen_R11_C3_OSTEOSARCOMA_EXALLC | CD25 on naive-mature B cell || id:ebi-a-GCST90001791 | Inverse variance weighted | 4 | 0.261959 | 0.448758 | 0.559394 | -0.61761 | 1.141524 | 1.299473 | 0.539234 | 3.131538 |
| ebi-a-GCST90001792 | finngen_R11_C3_OSTEOSARCOMA_EXALLC | Osteosarcoma (controls excluding all cancers) || id:finngen_R11_C3_OSTEOSARCOMA_EXALLC | CD25 on unswitched memory B cell || id:ebi-a-GCST90001792 | Inverse variance weighted | 4 | 0.374274 | 0.409595 | 0.36084 | -0.42853 | 1.17708 | 1.453936 | 0.651465 | 3.244886 |
| ebi-a-GCST90001793 | finngen_R11_C3_OSTEOSARCOMA_EXALLC | Osteosarcoma (controls excluding all cancers) || id:finngen_R11_C3_OSTEOSARCOMA_EXALLC | CD25 on switched memory B cell || id:ebi-a-GCST90001793 | Inverse variance weighted | 3 | 0.015827 | 0.551992 | 0.977126 | -1.06608 | 1.097731 | 1.015953 | 0.344357 | 2.997357 |
| ebi-a-GCST90001794 | finngen_R11_C3_OSTEOSARCOMA_EXALLC | Osteosarcoma (controls excluding all cancers) || id:finngen_R11_C3_OSTEOSARCOMA_EXALLC | CD25 on IgD+ B cell || id:ebi-a-GCST90001794 | Inverse variance weighted | 2 | 0.414519 | 0.743233 | 0.577033 | -1.04222 | 1.871256 | 1.513643 | 0.352672 | 6.496448 |
| ebi-a-GCST90001795 | finngen_R11_C3_OSTEOSARCOMA_EXALLC | Osteosarcoma (controls excluding all cancers) || id:finngen_R11_C3_OSTEOSARCOMA_EXALLC | CD25 on transitional B cell || id:ebi-a-GCST90001795 | Inverse variance weighted | 2 | 0.956499 | 0.711466 | 0.178817 | -0.43798 | 2.350973 | 2.602569 | 0.645342 | 10.49578 |
| ebi-a-GCST90001798 | finngen_R11_C3_OSTEOSARCOMA_EXALLC | Osteosarcoma (controls excluding all cancers) || id:finngen_R11_C3_OSTEOSARCOMA_EXALLC | CD27 on CD24+ CD27+ B cell || id:ebi-a-GCST90001798 | Inverse variance weighted | 10 | -0.26347 | 0.251347 | 0.294522 | -0.75611 | 0.229165 | 0.768377 | 0.469487 | 1.257549 |
| ebi-a-GCST90001800 | finngen_R11_C3_OSTEOSARCOMA_EXALLC | Osteosarcoma (controls excluding all cancers) || id:finngen_R11_C3_OSTEOSARCOMA_EXALLC | CD27 on IgD+ CD24+ B cell || id:ebi-a-GCST90001800 | Inverse variance weighted | 6 | -0.3354 | 0.319518 | 0.293859 | -0.96165 | 0.290859 | 0.715055 | 0.382262 | 1.337576 |
| ebi-a-GCST90001801 | finngen_R11_C3_OSTEOSARCOMA_EXALLC | Osteosarcoma (controls excluding all cancers) || id:finngen_R11_C3_OSTEOSARCOMA_EXALLC | CD27 on IgD+ CD38- unswitched memory B cell || id:ebi-a-GCST90001801 | Inverse variance weighted | 5 | -0.11218 | 0.261802 | 0.66829 | -0.62531 | 0.40095 | 0.893882 | 0.535094 | 1.493243 |
| ebi-a-GCST90001802 | finngen_R11_C3_OSTEOSARCOMA_EXALLC | Osteosarcoma (controls excluding all cancers) || id:finngen_R11_C3_OSTEOSARCOMA_EXALLC | CD27 on IgD- CD38- B cell || id:ebi-a-GCST90001802 | Inverse variance weighted | 7 | -0.08682 | 0.296369 | 0.769572 | -0.6677 | 0.494067 | 0.916845 | 0.512886 | 1.638969 |
| ebi-a-GCST90001803 | finngen_R11_C3_OSTEOSARCOMA_EXALLC | Osteosarcoma (controls excluding all cancers) || id:finngen_R11_C3_OSTEOSARCOMA_EXALLC | CD27 on IgD- CD38+ B cell || id:ebi-a-GCST90001803 | Inverse variance weighted | 2 | 0.246134 | 0.822002 | 0.76461 | -1.36499 | 1.857258 | 1.279071 | 0.255383 | 6.406145 |
| ebi-a-GCST90001804 | finngen_R11_C3_OSTEOSARCOMA_EXALLC | Osteosarcoma (controls excluding all cancers) || id:finngen_R11_C3_OSTEOSARCOMA_EXALLC | CD27 on IgD- CD38dim B cell || id:ebi-a-GCST90001804 | Inverse variance weighted | 7 | -0.14151 | 0.249801 | 0.571053 | -0.63112 | 0.348097 | 0.868044 | 0.531995 | 1.41637 |
| ebi-a-GCST90001805 | finngen_R11_C3_OSTEOSARCOMA_EXALLC | Osteosarcoma (controls excluding all cancers) || id:finngen_R11_C3_OSTEOSARCOMA_EXALLC | CD27 on memory B cell || id:ebi-a-GCST90001805 | Inverse variance weighted | 7 | -0.11918 | 0.296287 | 0.687503 | -0.6999 | 0.461542 | 0.887648 | 0.496634 | 1.586519 |
| ebi-a-GCST90001806 | finngen_R11_C3_OSTEOSARCOMA_EXALLC | Osteosarcoma (controls excluding all cancers) || id:finngen_R11_C3_OSTEOSARCOMA_EXALLC | CD27 on unswitched memory B cell || id:ebi-a-GCST90001806 | Inverse variance weighted | 11 | -0.20235 | 0.280584 | 0.470805 | -0.75229 | 0.347596 | 0.81681 | 0.471284 | 1.41566 |
| ebi-a-GCST90001808 | finngen_R11_C3_OSTEOSARCOMA_EXALLC | Osteosarcoma (controls excluding all cancers) || id:finngen_R11_C3_OSTEOSARCOMA_EXALLC | CD27 on switched memory B cell || id:ebi-a-GCST90001808 | Inverse variance weighted | 10 | -0.25077 | 0.233641 | 0.283128 | -0.70871 | 0.207165 | 0.778201 | 0.492281 | 1.230185 |
| ebi-a-GCST90001811 | finngen_R11_C3_OSTEOSARCOMA_EXALLC | Osteosarcoma (controls excluding all cancers) || id:finngen_R11_C3_OSTEOSARCOMA_EXALLC | CD38 on IgD+ CD24- B cell || id:ebi-a-GCST90001811 | Inverse variance weighted | 2 | 0.451911 | 0.563227 | 0.422345 | -0.65201 | 1.555835 | 1.571311 | 0.520995 | 4.739042 |
| ebi-a-GCST90001812 | finngen_R11_C3_OSTEOSARCOMA_EXALLC | Osteosarcoma (controls excluding all cancers) || id:finngen_R11_C3_OSTEOSARCOMA_EXALLC | CD38 on IgD+ CD38+ B cell || id:ebi-a-GCST90001812 | Inverse variance weighted | 3 | -0.30621 | 0.674634 | 0.649913 | -1.62849 | 1.016077 | 0.736235 | 0.196226 | 2.762338 |
| ebi-a-GCST90001813 | finngen_R11_C3_OSTEOSARCOMA_EXALLC | Osteosarcoma (controls excluding all cancers) || id:finngen_R11_C3_OSTEOSARCOMA_EXALLC | CD38 on IgD+ CD38dim B cell || id:ebi-a-GCST90001813 | Inverse variance weighted | 4 | -0.10547 | 0.52703 | 0.841381 | -1.13845 | 0.927506 | 0.899898 | 0.320314 | 2.528196 |
| ebi-a-GCST90001815 | finngen_R11_C3_OSTEOSARCOMA_EXALLC | Osteosarcoma (controls excluding all cancers) || id:finngen_R11_C3_OSTEOSARCOMA_EXALLC | CD38 on IgD- CD38dim B cell || id:ebi-a-GCST90001815 | Inverse variance weighted | 3 | 0.040112 | 0.57294 | 0.944185 | -1.08285 | 1.163074 | 1.040927 | 0.338629 | 3.199754 |
| ebi-a-GCST90001816 | finngen_R11_C3_OSTEOSARCOMA_EXALLC | Osteosarcoma (controls excluding all cancers) || id:finngen_R11_C3_OSTEOSARCOMA_EXALLC | CD38 on naive-mature B cell || id:ebi-a-GCST90001816 | Inverse variance weighted | 3 | 0.047396 | 0.633793 | 0.940389 | -1.19484 | 1.289629 | 1.048537 | 0.302753 | 3.63144 |
| ebi-a-GCST90001819 | finngen_R11_C3_OSTEOSARCOMA_EXALLC | Osteosarcoma (controls excluding all cancers) || id:finngen_R11_C3_OSTEOSARCOMA_EXALLC | CD38 on transitional B cell || id:ebi-a-GCST90001819 | Inverse variance weighted | 5 | -0.20672 | 0.453176 | 0.648282 | -1.09494 | 0.681508 | 0.81325 | 0.334559 | 1.976858 |
| ebi-a-GCST90001820 | finngen_R11_C3_OSTEOSARCOMA_EXALLC | Osteosarcoma (controls excluding all cancers) || id:finngen_R11_C3_OSTEOSARCOMA_EXALLC | IgD on IgD+ CD24+ B cell || id:ebi-a-GCST90001820 | Inverse variance weighted | 6 | 0.325739 | 0.350772 | 0.353078 | -0.36177 | 1.013252 | 1.385054 | 0.69644 | 2.754545 |
| ebi-a-GCST90001821 | finngen_R11_C3_OSTEOSARCOMA_EXALLC | Osteosarcoma (controls excluding all cancers) || id:finngen_R11_C3_OSTEOSARCOMA_EXALLC | IgD on IgD+ CD24- B cell || id:ebi-a-GCST90001821 | Inverse variance weighted | 5 | 0.021794 | 0.228524 | 0.924021 | -0.42611 | 0.469702 | 1.022034 | 0.653042 | 1.599518 |
| ebi-a-GCST90001823 | finngen_R11_C3_OSTEOSARCOMA_EXALLC | Osteosarcoma (controls excluding all cancers) || id:finngen_R11_C3_OSTEOSARCOMA_EXALLC | IgD on IgD+ CD38- unswitched memory B cell || id:ebi-a-GCST90001823 | Inverse variance weighted | 2 | 0.148545 | 0.251016 | 0.554002 | -0.34345 | 0.640536 | 1.160144 | 0.709321 | 1.897497 |
| ebi-a-GCST90001824 | finngen_R11_C3_OSTEOSARCOMA_EXALLC | Osteosarcoma (controls excluding all cancers) || id:finngen_R11_C3_OSTEOSARCOMA_EXALLC | IgD on IgD+ CD38+ B cell || id:ebi-a-GCST90001824 | Inverse variance weighted | 6 | 0.024952 | 0.210686 | 0.905725 | -0.38799 | 0.437897 | 1.025266 | 0.678417 | 1.549445 |
| ebi-a-GCST90001825 | finngen_R11_C3_OSTEOSARCOMA_EXALLC | Osteosarcoma (controls excluding all cancers) || id:finngen_R11_C3_OSTEOSARCOMA_EXALLC | IgD on IgD+ CD38dim B cell || id:ebi-a-GCST90001825 | Inverse variance weighted | 5 | 0.014491 | 0.239269 | 0.951706 | -0.45448 | 0.483458 | 1.014597 | 0.634781 | 1.621673 |
| ebi-a-GCST90001826 | finngen_R11_C3_OSTEOSARCOMA_EXALLC | Osteosarcoma (controls excluding all cancers) || id:finngen_R11_C3_OSTEOSARCOMA_EXALLC | IgD on unswitched memory B cell || id:ebi-a-GCST90001826 | Inverse variance weighted | 5 | 0.216173 | 0.367098 | 0.555948 | -0.50334 | 0.935685 | 1.241317 | 0.604509 | 2.548959 |
| ebi-a-GCST90001827 | finngen_R11_C3_OSTEOSARCOMA_EXALLC | Osteosarcoma (controls excluding all cancers) || id:finngen_R11_C3_OSTEOSARCOMA_EXALLC | IgD on IgD+ B cell || id:ebi-a-GCST90001827 | Inverse variance weighted | 2 | 0.119064 | 0.399678 | 0.76578 | -0.66431 | 0.902434 | 1.126442 | 0.514631 | 2.465596 |
| ebi-a-GCST90001828 | finngen_R11_C3_OSTEOSARCOMA_EXALLC | Osteosarcoma (controls excluding all cancers) || id:finngen_R11_C3_OSTEOSARCOMA_EXALLC | IgD on transitional B cell || id:ebi-a-GCST90001828 | Inverse variance weighted | 5 | 0.133389 | 0.274415 | 0.626907 | -0.40447 | 0.671243 | 1.142695 | 0.667334 | 1.956669 |
| ebi-a-GCST90001829 | finngen_R11_C3_OSTEOSARCOMA_EXALLC | Osteosarcoma (controls excluding all cancers) || id:finngen_R11_C3_OSTEOSARCOMA_EXALLC | BAFF-R on B cell || id:ebi-a-GCST90001829 | Inverse variance weighted | 10 | -0.21598 | 0.186084 | 0.245791 | -0.5807 | 0.148749 | 0.805755 | 0.559507 | 1.160382 |
| ebi-a-GCST90001832 | finngen_R11_C3_OSTEOSARCOMA_EXALLC | Osteosarcoma (controls excluding all cancers) || id:finngen_R11_C3_OSTEOSARCOMA_EXALLC | CD62L on CD62L+ plasmacytoid Dendritic Cell || id:ebi-a-GCST90001832 | Inverse variance weighted | 3 | -0.38581 | 0.461889 | 0.403552 | -1.29112 | 0.519488 | 0.679897 | 0.274964 | 1.681167 |
| ebi-a-GCST90001833 | finngen_R11_C3_OSTEOSARCOMA_EXALLC | Osteosarcoma (controls excluding all cancers) || id:finngen_R11_C3_OSTEOSARCOMA_EXALLC | CD62L on CD62L+ Dendritic Cell || id:ebi-a-GCST90001833 | Inverse variance weighted | 2 | 0.603479 | 1.582112 | 0.702878 | -2.49746 | 3.704419 | 1.828468 | 0.082294 | 40.62642 |
| ebi-a-GCST90001834 | finngen_R11_C3_OSTEOSARCOMA_EXALLC | Osteosarcoma (controls excluding all cancers) || id:finngen_R11_C3_OSTEOSARCOMA_EXALLC | CD62L on monocyte || id:ebi-a-GCST90001834 | Inverse variance weighted | 2 | 0.0428 | 0.498727 | 0.931611 | -0.9347 | 1.020304 | 1.043729 | 0.392702 | 2.774039 |
| ebi-a-GCST90001838 | finngen_R11_C3_OSTEOSARCOMA_EXALLC | Osteosarcoma (controls excluding all cancers) || id:finngen_R11_C3_OSTEOSARCOMA_EXALLC | CD3 on naive CD8+ T cell || id:ebi-a-GCST90001838 | Inverse variance weighted | 6 | 0.015699 | 0.305833 | 0.959062 | -0.58373 | 0.615132 | 1.015822 | 0.557811 | 1.8499 |
| ebi-a-GCST90001839 | finngen_R11_C3_OSTEOSARCOMA_EXALLC | Osteosarcoma (controls excluding all cancers) || id:finngen_R11_C3_OSTEOSARCOMA_EXALLC | CD3 on Effector Memory CD8+ T cell || id:ebi-a-GCST90001839 | Inverse variance weighted | 3 | 0.569504 | 0.444836 | 0.200455 | -0.30237 | 1.441382 | 1.76739 | 0.739061 | 4.226534 |
| ebi-a-GCST90001840 | finngen_R11_C3_OSTEOSARCOMA_EXALLC | Osteosarcoma (controls excluding all cancers) || id:finngen_R11_C3_OSTEOSARCOMA_EXALLC | CD3 on Terminally Differentiated CD8+ T cell || id:ebi-a-GCST90001840 | Inverse variance weighted | 2 | 0.03966 | 1.043708 | 0.969688 | -2.00601 | 2.085328 | 1.040457 | 0.134525 | 8.047227 |
| ebi-a-GCST90001841 | finngen_R11_C3_OSTEOSARCOMA_EXALLC | Osteosarcoma (controls excluding all cancers) || id:finngen_R11_C3_OSTEOSARCOMA_EXALLC | CD3 on Central Memory CD4+ T cell || id:ebi-a-GCST90001841 | Inverse variance weighted | 4 | 0.049021 | 0.292908 | 0.867086 | -0.52508 | 0.62312 | 1.050243 | 0.591509 | 1.864737 |
| ebi-a-GCST90001842 | finngen_R11_C3_OSTEOSARCOMA_EXALLC | Osteosarcoma (controls excluding all cancers) || id:finngen_R11_C3_OSTEOSARCOMA_EXALLC | CD3 on Naive CD4+ T cell || id:ebi-a-GCST90001842 | Inverse variance weighted | 4 | 0.053253 | 0.247344 | 0.829534 | -0.43154 | 0.538048 | 1.054696 | 0.649507 | 1.71266 |
| ebi-a-GCST90001843 | finngen_R11_C3_OSTEOSARCOMA_EXALLC | Osteosarcoma (controls excluding all cancers) || id:finngen_R11_C3_OSTEOSARCOMA_EXALLC | CD3 on Effector Memory CD4+ T cell || id:ebi-a-GCST90001843 | Inverse variance weighted | 2 | 0.323277 | 0.365098 | 0.375913 | -0.39231 | 1.038868 | 1.381647 | 0.675491 | 2.826017 |
| ebi-a-GCST90001845 | finngen_R11_C3_OSTEOSARCOMA_EXALLC | Osteosarcoma (controls excluding all cancers) || id:finngen_R11_C3_OSTEOSARCOMA_EXALLC | CD3 on CD45RA- CD4+ T cell || id:ebi-a-GCST90001845 | Inverse variance weighted | 3 | 0.039303 | 0.397286 | 0.921196 | -0.73938 | 0.817984 | 1.040085 | 0.47741 | 2.265927 |
| ebi-a-GCST90001846 | finngen_R11_C3_OSTEOSARCOMA_EXALLC | Osteosarcoma (controls excluding all cancers) || id:finngen_R11_C3_OSTEOSARCOMA_EXALLC | CD3 on Central Memory CD8+ T cell || id:ebi-a-GCST90001846 | Inverse variance weighted (multiplicative random effects) | 3 | -0.23106 | 0.818281 | 0.777656 | -1.83489 | 1.372768 | 0.79369 | 0.159631 | 3.94626 |
| ebi-a-GCST90001847 | finngen_R11_C3_OSTEOSARCOMA_EXALLC | Osteosarcoma (controls excluding all cancers) || id:finngen_R11_C3_OSTEOSARCOMA_EXALLC | CD3 on HLA DR+ T cell || id:ebi-a-GCST90001847 | Inverse variance weighted | 2 | 0.477402 | 0.440904 | 0.278906 | -0.38677 | 1.341575 | 1.611882 | 0.679247 | 3.825061 |
| ebi-a-GCST90001848 | finngen_R11_C3_OSTEOSARCOMA_EXALLC | Osteosarcoma (controls excluding all cancers) || id:finngen_R11_C3_OSTEOSARCOMA_EXALLC | CD3 on Natural Killer T || id:ebi-a-GCST90001848 | Inverse variance weighted | 2 | -0.00205 | 0.921299 | 0.998226 | -1.8078 | 1.803698 | 0.997954 | 0.164015 | 6.072063 |
| ebi-a-GCST90001849 | finngen_R11_C3_OSTEOSARCOMA_EXALLC | Osteosarcoma (controls excluding all cancers) || id:finngen_R11_C3_OSTEOSARCOMA_EXALLC | CD3 on HLA DR+ CD4+ T cell || id:ebi-a-GCST90001849 | Inverse variance weighted | 2 | 0.252598 | 0.556931 | 0.65015 | -0.83899 | 1.344184 | 1.287366 | 0.432148 | 3.835054 |
| ebi-a-GCST90001851 | finngen_R11_C3_OSTEOSARCOMA_EXALLC | Osteosarcoma (controls excluding all cancers) || id:finngen_R11_C3_OSTEOSARCOMA_EXALLC | CD3 on T cell || id:ebi-a-GCST90001851 | Inverse variance weighted | 3 | 0.165506 | 0.357322 | 0.643232 | -0.53484 | 0.865857 | 1.17999 | 0.58576 | 2.377041 |
| ebi-a-GCST90001853 | finngen_R11_C3_OSTEOSARCOMA_EXALLC | Osteosarcoma (controls excluding all cancers) || id:finngen_R11_C3_OSTEOSARCOMA_EXALLC | CD3 on activated CD4 regulatory T cell || id:ebi-a-GCST90001853 | Inverse variance weighted | 4 | 0.166438 | 0.363547 | 0.647084 | -0.54611 | 0.878989 | 1.18109 | 0.579196 | 2.408465 |
| ebi-a-GCST90001854 | finngen_R11_C3_OSTEOSARCOMA_EXALLC | Osteosarcoma (controls excluding all cancers) || id:finngen_R11_C3_OSTEOSARCOMA_EXALLC | CD3 on CD39+ activated CD4 regulatory T cell || id:ebi-a-GCST90001854 | Inverse variance weighted | 5 | 0.225608 | 0.324078 | 0.486332 | -0.40958 | 0.8608 | 1.253084 | 0.663927 | 2.365052 |
| ebi-a-GCST90001855 | finngen_R11_C3_OSTEOSARCOMA_EXALLC | Osteosarcoma (controls excluding all cancers) || id:finngen_R11_C3_OSTEOSARCOMA_EXALLC | CD3 on secreting CD4 regulatory T cell || id:ebi-a-GCST90001855 | Inverse variance weighted | 3 | 0.093685 | 0.342812 | 0.784635 | -0.57823 | 0.765597 | 1.098214 | 0.560892 | 2.150278 |
| ebi-a-GCST90001856 | finngen_R11_C3_OSTEOSARCOMA_EXALLC | Osteosarcoma (controls excluding all cancers) || id:finngen_R11_C3_OSTEOSARCOMA_EXALLC | CD3 on CD39+ secreting CD4 regulatory T cell || id:ebi-a-GCST90001856 | Inverse variance weighted | 3 | 0.127841 | 0.370761 | 0.730239 | -0.59885 | 0.854533 | 1.136373 | 0.549443 | 2.350277 |
| ebi-a-GCST90001857 | finngen_R11_C3_OSTEOSARCOMA_EXALLC | Osteosarcoma (controls excluding all cancers) || id:finngen_R11_C3_OSTEOSARCOMA_EXALLC | CD3 on activated & secreting CD4 regulatory T cell || id:ebi-a-GCST90001857 | Inverse variance weighted | 4 | 0.179036 | 0.356062 | 0.615088 | -0.51884 | 0.876917 | 1.196064 | 0.595208 | 2.403479 |
| ebi-a-GCST90001858 | finngen_R11_C3_OSTEOSARCOMA_EXALLC | Osteosarcoma (controls excluding all cancers) || id:finngen_R11_C3_OSTEOSARCOMA_EXALLC | CD3 on CD45RA+ CD4+ T cell || id:ebi-a-GCST90001858 | Inverse variance weighted | 5 | 0.125041 | 0.260222 | 0.630859 | -0.38499 | 0.635076 | 1.133195 | 0.680455 | 1.887166 |
| ebi-a-GCST90001859 | finngen_R11_C3_OSTEOSARCOMA_EXALLC | Osteosarcoma (controls excluding all cancers) || id:finngen_R11_C3_OSTEOSARCOMA_EXALLC | CD3 on CD8+ T cell || id:ebi-a-GCST90001859 | Inverse variance weighted | 2 | -0.00663 | 1.039653 | 0.994909 | -2.04435 | 2.031086 | 0.993389 | 0.129464 | 7.622357 |
| ebi-a-GCST90001860 | finngen_R11_C3_OSTEOSARCOMA_EXALLC | Osteosarcoma (controls excluding all cancers) || id:finngen_R11_C3_OSTEOSARCOMA_EXALLC | CD3 on CD39+ CD4+ T cell || id:ebi-a-GCST90001860 | Inverse variance weighted | 4 | 0.081063 | 0.331639 | 0.806897 | -0.56895 | 0.731074 | 1.084439 | 0.56612 | 2.077311 |
| ebi-a-GCST90001861 | finngen_R11_C3_OSTEOSARCOMA_EXALLC | Osteosarcoma (controls excluding all cancers) || id:finngen_R11_C3_OSTEOSARCOMA_EXALLC | CD3 on CD28+ CD4+ T cell || id:ebi-a-GCST90001861 | Inverse variance weighted | 2 | 0.134686 | 0.356204 | 0.705346 | -0.56347 | 0.832845 | 1.144177 | 0.569228 | 2.299854 |
| ebi-a-GCST90001863 | finngen_R11_C3_OSTEOSARCOMA_EXALLC | Osteosarcoma (controls excluding all cancers) || id:finngen_R11_C3_OSTEOSARCOMA_EXALLC | CD3 on CD28+ CD45RA- CD8+ T cell || id:ebi-a-GCST90001863 | Inverse variance weighted | 5 | 0.071577 | 0.495049 | 0.885038 | -0.89872 | 1.041873 | 1.074201 | 0.407091 | 2.83452 |
| ebi-a-GCST90001864 | finngen_R11_C3_OSTEOSARCOMA_EXALLC | Osteosarcoma (controls excluding all cancers) || id:finngen_R11_C3_OSTEOSARCOMA_EXALLC | CD3 on CD28+ CD45RA+ CD8+ T cell || id:ebi-a-GCST90001864 | Inverse variance weighted | 3 | -0.36978 | 0.406443 | 0.362929 | -1.16641 | 0.426848 | 0.690886 | 0.311483 | 1.53242 |
| ebi-a-GCST90001865 | finngen_R11_C3_OSTEOSARCOMA_EXALLC | Osteosarcoma (controls excluding all cancers) || id:finngen_R11_C3_OSTEOSARCOMA_EXALLC | CD3 on CD28- CD8+ T cell || id:ebi-a-GCST90001865 | Inverse variance weighted | 2 | 0.135326 | 0.964423 | 0.888409 | -1.75494 | 2.025594 | 1.14491 | 0.172917 | 7.580614 |
| ebi-a-GCST90001867 | finngen_R11_C3_OSTEOSARCOMA_EXALLC | Osteosarcoma (controls excluding all cancers) || id:finngen_R11_C3_OSTEOSARCOMA_EXALLC | CD3 on CD4+ T cell || id:ebi-a-GCST90001867 | Inverse variance weighted | 2 | -0.30755 | 0.574575 | 0.592467 | -1.43372 | 0.818617 | 0.735246 | 0.238421 | 2.267363 |
| ebi-a-GCST90001868 | finngen_R11_C3_OSTEOSARCOMA_EXALLC | Osteosarcoma (controls excluding all cancers) || id:finngen_R11_C3_OSTEOSARCOMA_EXALLC | CD3 on CD4 regulatory T cell || id:ebi-a-GCST90001868 | Inverse variance weighted | 3 | 0.096317 | 0.337425 | 0.775301 | -0.56504 | 0.757671 | 1.101108 | 0.56834 | 2.133302 |
| ebi-a-GCST90001869 | finngen_R11_C3_OSTEOSARCOMA_EXALLC | Osteosarcoma (controls excluding all cancers) || id:finngen_R11_C3_OSTEOSARCOMA_EXALLC | CD3 on resting CD4 regulatory T cell || id:ebi-a-GCST90001869 | Inverse variance weighted | 5 | -0.03652 | 0.29396 | 0.901133 | -0.61268 | 0.539642 | 0.96414 | 0.541897 | 1.715393 |
| ebi-a-GCST90001870 | finngen_R11_C3_OSTEOSARCOMA_EXALLC | Osteosarcoma (controls excluding all cancers) || id:finngen_R11_C3_OSTEOSARCOMA_EXALLC | CD34 on Hematopoietic Stem Cell || id:ebi-a-GCST90001870 | Inverse variance weighted | 4 | 0.25535 | 0.49616 | 0.606796 | -0.71712 | 1.227824 | 1.290913 | 0.488154 | 3.413794 |
| ebi-a-GCST90001872 | finngen_R11_C3_OSTEOSARCOMA_EXALLC | Osteosarcoma (controls excluding all cancers) || id:finngen_R11_C3_OSTEOSARCOMA_EXALLC | HVEM on naive CD8+ T cell || id:ebi-a-GCST90001872 | Inverse variance weighted | 2 | -0.23753 | 0.572546 | 0.678244 | -1.35972 | 0.884663 | 0.788576 | 0.256733 | 2.422168 |
| ebi-a-GCST90001883 | finngen_R11_C3_OSTEOSARCOMA_EXALLC | Osteosarcoma (controls excluding all cancers) || id:finngen_R11_C3_OSTEOSARCOMA_EXALLC | CD16-CD56 on Natural Killer T || id:ebi-a-GCST90001883 | Inverse variance weighted | 4 | -0.71721 | 0.402056 | 0.074446 | -1.50524 | 0.070818 | 0.488111 | 0.221964 | 1.073385 |
| ebi-a-GCST90001884 | finngen_R11_C3_OSTEOSARCOMA_EXALLC | Osteosarcoma (controls excluding all cancers) || id:finngen_R11_C3_OSTEOSARCOMA_EXALLC | CD16-CD56 on Natural Killer || id:ebi-a-GCST90001884 | Inverse variance weighted | 8 | -0.19867 | 0.332612 | 0.550311 | -0.85059 | 0.453253 | 0.819822 | 0.427164 | 1.573422 |
| ebi-a-GCST90001885 | finngen_R11_C3_OSTEOSARCOMA_EXALLC | Osteosarcoma (controls excluding all cancers) || id:finngen_R11_C3_OSTEOSARCOMA_EXALLC | CD16-CD56 on HLA DR+ Natural Killer || id:ebi-a-GCST90001885 | Inverse variance weighted | 2 | 0.53979 | 1.026535 | 0.599001 | -1.47222 | 2.551798 | 1.715647 | 0.229416 | 12.83015 |
| ebi-a-GCST90001886 | finngen_R11_C3_OSTEOSARCOMA_EXALLC | Osteosarcoma (controls excluding all cancers) || id:finngen_R11_C3_OSTEOSARCOMA_EXALLC | CD28 on CD39+ activated CD4 regulatory T cell || id:ebi-a-GCST90001886 | Inverse variance weighted | 2 | -0.108 | 0.651137 | 0.868269 | -1.38423 | 1.168233 | 0.897631 | 0.250518 | 3.216303 |
| ebi-a-GCST90001887 | finngen_R11_C3_OSTEOSARCOMA_EXALLC | Osteosarcoma (controls excluding all cancers) || id:finngen_R11_C3_OSTEOSARCOMA_EXALLC | CD28 on secreting CD4 regulatory T cell || id:ebi-a-GCST90001887 | Inverse variance weighted | 3 | -0.18518 | 0.527522 | 0.725567 | -1.21912 | 0.848767 | 0.830959 | 0.295491 | 2.336764 |
| ebi-a-GCST90001888 | finngen_R11_C3_OSTEOSARCOMA_EXALLC | Osteosarcoma (controls excluding all cancers) || id:finngen_R11_C3_OSTEOSARCOMA_EXALLC | CD28 on CD39+ secreting CD4 regulatory T cell || id:ebi-a-GCST90001888 | Inverse variance weighted | 2 | -0.27395 | 0.403894 | 0.497599 | -1.06558 | 0.517682 | 0.76037 | 0.344527 | 1.678133 |
| ebi-a-GCST90001890 | finngen_R11_C3_OSTEOSARCOMA_EXALLC | Osteosarcoma (controls excluding all cancers) || id:finngen_R11_C3_OSTEOSARCOMA_EXALLC | CD28 on CD45RA+ CD4+ T cell || id:ebi-a-GCST90001890 | Inverse variance weighted | 2 | 0.03781 | 0.472726 | 0.936251 | -0.88873 | 0.964353 | 1.038534 | 0.411176 | 2.62309 |
| ebi-a-GCST90001891 | finngen_R11_C3_OSTEOSARCOMA_EXALLC | Osteosarcoma (controls excluding all cancers) || id:finngen_R11_C3_OSTEOSARCOMA_EXALLC | CD28 on CD45RA- CD4 not regulatory T cell || id:ebi-a-GCST90001891 | Inverse variance weighted | 3 | 0.186415 | 0.681252 | 0.784364 | -1.14884 | 1.521669 | 1.204922 | 0.317005 | 4.579863 |
| ebi-a-GCST90001892 | finngen_R11_C3_OSTEOSARCOMA_EXALLC | Osteosarcoma (controls excluding all cancers) || id:finngen_R11_C3_OSTEOSARCOMA_EXALLC | CD28 on CD39+ CD4+ T cell || id:ebi-a-GCST90001892 | Inverse variance weighted | 6 | -0.17567 | 0.260565 | 0.500193 | -0.68638 | 0.335038 | 0.838896 | 0.503397 | 1.397993 |
| ebi-a-GCST90001894 | finngen_R11_C3_OSTEOSARCOMA_EXALLC | Osteosarcoma (controls excluding all cancers) || id:finngen_R11_C3_OSTEOSARCOMA_EXALLC | CD28 on CD28+ CD4+ T cell || id:ebi-a-GCST90001894 | Inverse variance weighted | 2 | 0.597033 | 0.495244 | 0.227997 | -0.37364 | 1.567711 | 1.816721 | 0.688222 | 4.795658 |
| ebi-a-GCST90001896 | finngen_R11_C3_OSTEOSARCOMA_EXALLC | Osteosarcoma (controls excluding all cancers) || id:finngen_R11_C3_OSTEOSARCOMA_EXALLC | CD28 on CD28+ CD45RA+ CD8+ T cell || id:ebi-a-GCST90001896 | Inverse variance weighted | 3 | 0.344239 | 0.666408 | 0.605465 | -0.96192 | 1.650399 | 1.410915 | 0.382158 | 5.209059 |
| ebi-a-GCST90001897 | finngen_R11_C3_OSTEOSARCOMA_EXALLC | Osteosarcoma (controls excluding all cancers) || id:finngen_R11_C3_OSTEOSARCOMA_EXALLC | CD28 on CD39+ CD8+ T cell || id:ebi-a-GCST90001897 | Inverse variance weighted | 2 | 0.089076 | 0.212959 | 0.675744 | -0.32832 | 0.506475 | 1.093164 | 0.72013 | 1.659432 |
| ebi-a-GCST90001898 | finngen_R11_C3_OSTEOSARCOMA_EXALLC | Osteosarcoma (controls excluding all cancers) || id:finngen_R11_C3_OSTEOSARCOMA_EXALLC | CD28 on CD4+ T cell || id:ebi-a-GCST90001898 | Inverse variance weighted | 2 | 0.630996 | 0.52446 | 0.228924 | -0.39695 | 1.658938 | 1.879482 | 0.672371 | 5.253729 |
| ebi-a-GCST90001901 | finngen_R11_C3_OSTEOSARCOMA_EXALLC | Osteosarcoma (controls excluding all cancers) || id:finngen_R11_C3_OSTEOSARCOMA_EXALLC | CD28 on CD39+ resting CD4 regulatory T cell || id:ebi-a-GCST90001901 | Inverse variance weighted | 2 | 0.120066 | 0.7334 | 0.869959 | -1.3174 | 1.557529 | 1.127571 | 0.267831 | 4.747077 |
| ebi-a-GCST90001906 | finngen_R11_C3_OSTEOSARCOMA_EXALLC | Osteosarcoma (controls excluding all cancers) || id:finngen_R11_C3_OSTEOSARCOMA_EXALLC | CD86 on granulocyte || id:ebi-a-GCST90001906 | Inverse variance weighted | 2 | 0.297833 | 1.301607 | 0.819009 | -2.25332 | 2.848983 | 1.346937 | 0.10505 | 17.27021 |
| ebi-a-GCST90001907 | finngen_R11_C3_OSTEOSARCOMA_EXALLC | Osteosarcoma (controls excluding all cancers) || id:finngen_R11_C3_OSTEOSARCOMA_EXALLC | CCR7 on naive CD4+ T cell || id:ebi-a-GCST90001907 | Inverse variance weighted | 4 | 0.568482 | 0.404499 | 0.159903 | -0.22434 | 1.361301 | 1.765585 | 0.799046 | 3.901264 |
| ebi-a-GCST90001908 | finngen_R11_C3_OSTEOSARCOMA_EXALLC | Osteosarcoma (controls excluding all cancers) || id:finngen_R11_C3_OSTEOSARCOMA_EXALLC | CCR7 on naive CD8+ T cell || id:ebi-a-GCST90001908 | Inverse variance weighted | 2 | 0.971613 | 0.997714 | 0.330136 | -0.98391 | 2.927131 | 2.642202 | 0.373848 | 18.67399 |
| ebi-a-GCST90001910 | finngen_R11_C3_OSTEOSARCOMA_EXALLC | Osteosarcoma (controls excluding all cancers) || id:finngen_R11_C3_OSTEOSARCOMA_EXALLC | CD45 on B cell || id:ebi-a-GCST90001910 | Inverse variance weighted | 2 | -1.00718 | 0.941965 | 0.284965 | -2.85343 | 0.839072 | 0.365248 | 0.057646 | 2.314218 |
| ebi-a-GCST90001911 | finngen_R11_C3_OSTEOSARCOMA_EXALLC | Osteosarcoma (controls excluding all cancers) || id:finngen_R11_C3_OSTEOSARCOMA_EXALLC | CD45 on Natural Killer || id:ebi-a-GCST90001911 | Inverse variance weighted | 2 | -0.1937 | 1.76039 | 0.912385 | -3.64406 | 3.256668 | 0.823908 | 0.026146 | 25.96289 |
| ebi-a-GCST90001917 | finngen_R11_C3_OSTEOSARCOMA_EXALLC | Osteosarcoma (controls excluding all cancers) || id:finngen_R11_C3_OSTEOSARCOMA_EXALLC | CD45 on CD8+ T cell || id:ebi-a-GCST90001917 | Inverse variance weighted | 2 | 0.405902 | 0.365097 | 0.26624 | -0.30969 | 1.121492 | 1.500655 | 0.733675 | 3.069429 |
| ebi-a-GCST90001920 | finngen_R11_C3_OSTEOSARCOMA_EXALLC | Osteosarcoma (controls excluding all cancers) || id:finngen_R11_C3_OSTEOSARCOMA_EXALLC | CD45 on HLA DR+ CD4+ T cell || id:ebi-a-GCST90001920 | Inverse variance weighted | 2 | 0.499908 | 0.798131 | 0.531086 | -1.06443 | 2.064245 | 1.64857 | 0.344925 | 7.87935 |
| ebi-a-GCST90001924 | finngen_R11_C3_OSTEOSARCOMA_EXALLC | Osteosarcoma (controls excluding all cancers) || id:finngen_R11_C3_OSTEOSARCOMA_EXALLC | CD127 on CD28+ CD4+ T cell || id:ebi-a-GCST90001924 | Inverse variance weighted | 3 | 1.216042 | 0.590558 | 0.039481 | 0.058548 | 2.373536 | 3.373807 | 1.060296 | 10.73528 |
| ebi-a-GCST90001926 | finngen_R11_C3_OSTEOSARCOMA_EXALLC | Osteosarcoma (controls excluding all cancers) || id:finngen_R11_C3_OSTEOSARCOMA_EXALLC | CD127 on granulocyte || id:ebi-a-GCST90001926 | Inverse variance weighted | 8 | -0.2519 | 0.261062 | 0.334588 | -0.76358 | 0.259779 | 0.777321 | 0.465993 | 1.296644 |
| ebi-a-GCST90001929 | finngen_R11_C3_OSTEOSARCOMA_EXALLC | Osteosarcoma (controls excluding all cancers) || id:finngen_R11_C3_OSTEOSARCOMA_EXALLC | CD127 on CD28+ CD45RA+ CD8+ T cell || id:ebi-a-GCST90001929 | Inverse variance weighted | 2 | 0.741597 | 1.025597 | 0.469626 | -1.26857 | 2.751768 | 2.099286 | 0.281232 | 15.67032 |
| ebi-a-GCST90001932 | finngen_R11_C3_OSTEOSARCOMA_EXALLC | Osteosarcoma (controls excluding all cancers) || id:finngen_R11_C3_OSTEOSARCOMA_EXALLC | CD127 on CD45RA+ CD4+ T cell || id:ebi-a-GCST90001932 | Inverse variance weighted | 4 | 0.504037 | 0.418932 | 0.228919 | -0.31707 | 1.325142 | 1.65539 | 0.72828 | 3.762721 |
| ebi-a-GCST90001933 | finngen_R11_C3_OSTEOSARCOMA_EXALLC | Osteosarcoma (controls excluding all cancers) || id:finngen_R11_C3_OSTEOSARCOMA_EXALLC | CD25 on CD45RA- CD4 not regulatory T cell || id:ebi-a-GCST90001933 | Inverse variance weighted | 2 | 1.045341 | 0.662227 | 0.114446 | -0.25263 | 2.343306 | 2.844367 | 0.776759 | 10.41562 |
| ebi-a-GCST90001941 | finngen_R11_C3_OSTEOSARCOMA_EXALLC | Osteosarcoma (controls excluding all cancers) || id:finngen_R11_C3_OSTEOSARCOMA_EXALLC | CD25 on secreting CD4 regulatory T cell || id:ebi-a-GCST90001941 | Inverse variance weighted | 2 | 0.916574 | 0.657828 | 0.163519 | -0.37277 | 2.205918 | 2.500708 | 0.688824 | 9.078577 |
| ebi-a-GCST90001942 | finngen_R11_C3_OSTEOSARCOMA_EXALLC | Osteosarcoma (controls excluding all cancers) || id:finngen_R11_C3_OSTEOSARCOMA_EXALLC | CD25 on CD39+ secreting CD4 regulatory T cell || id:ebi-a-GCST90001942 | Inverse variance weighted | 2 | 0.984705 | 0.648805 | 0.129085 | -0.28695 | 2.256362 | 2.677022 | 0.750548 | 9.548293 |
| ebi-a-GCST90001944 | finngen_R11_C3_OSTEOSARCOMA_EXALLC | Osteosarcoma (controls excluding all cancers) || id:finngen_R11_C3_OSTEOSARCOMA_EXALLC | CD123 on plasmacytoid Dendritic Cell || id:ebi-a-GCST90001944 | Inverse variance weighted | 2 | 0.090786 | 0.554302 | 0.869901 | -0.99565 | 1.177218 | 1.095035 | 0.369485 | 3.245332 |
| ebi-a-GCST90001945 | finngen_R11_C3_OSTEOSARCOMA_EXALLC | Osteosarcoma (controls excluding all cancers) || id:finngen_R11_C3_OSTEOSARCOMA_EXALLC | CD123 on CD62L+ plasmacytoid Dendritic Cell || id:ebi-a-GCST90001945 | Inverse variance weighted | 2 | 0.091421 | 0.559394 | 0.870181 | -1.00499 | 1.187834 | 1.09573 | 0.366048 | 3.279968 |
| ebi-a-GCST90001946 | finngen_R11_C3_OSTEOSARCOMA_EXALLC | Osteosarcoma (controls excluding all cancers) || id:finngen_R11_C3_OSTEOSARCOMA_EXALLC | CD33 on CD14+ monocyte || id:ebi-a-GCST90001946 | Inverse variance weighted (multiplicative random effects) | 5 | 0.198072 | 0.230111 | 0.389366 | -0.25295 | 0.64909 | 1.219051 | 0.77651 | 1.913799 |
| ebi-a-GCST90001947 | finngen_R11_C3_OSTEOSARCOMA_EXALLC | Osteosarcoma (controls excluding all cancers) || id:finngen_R11_C3_OSTEOSARCOMA_EXALLC | CD33 on CD33+ HLA DR+ CD14dim || id:ebi-a-GCST90001947 | Inverse variance weighted (multiplicative random effects) | 4 | 0.119781 | 0.221512 | 0.588686 | -0.31438 | 0.553945 | 1.12725 | 0.730239 | 1.740104 |
| ebi-a-GCST90001948 | finngen_R11_C3_OSTEOSARCOMA_EXALLC | Osteosarcoma (controls excluding all cancers) || id:finngen_R11_C3_OSTEOSARCOMA_EXALLC | CD33 on CD33dim HLA DR+ CD11b+ || id:ebi-a-GCST90001948 | Inverse variance weighted (multiplicative random effects) | 6 | 0.158167 | 0.216626 | 0.465308 | -0.26642 | 0.582754 | 1.171361 | 0.766116 | 1.790965 |
| ebi-a-GCST90001949 | finngen_R11_C3_OSTEOSARCOMA_EXALLC | Osteosarcoma (controls excluding all cancers) || id:finngen_R11_C3_OSTEOSARCOMA_EXALLC | CD33 on CD33dim HLA DR+ CD11b- || id:ebi-a-GCST90001949 | Inverse variance weighted (multiplicative random effects) | 7 | 0.13044 | 0.203029 | 0.520566 | -0.2675 | 0.528376 | 1.13933 | 0.765294 | 1.696176 |
| ebi-a-GCST90001950 | finngen_R11_C3_OSTEOSARCOMA_EXALLC | Osteosarcoma (controls excluding all cancers) || id:finngen_R11_C3_OSTEOSARCOMA_EXALLC | CD33 on Granulocytic Myeloid-Derived Suppressor Cells || id:ebi-a-GCST90001950 | Inverse variance weighted (multiplicative random effects) | 3 | 0.236347 | 0.374675 | 0.528168 | -0.49802 | 0.970711 | 1.266614 | 0.607735 | 2.63982 |
| ebi-a-GCST90001951 | finngen_R11_C3_OSTEOSARCOMA_EXALLC | Osteosarcoma (controls excluding all cancers) || id:finngen_R11_C3_OSTEOSARCOMA_EXALLC | CD33 on CD66b++ myeloid cell || id:ebi-a-GCST90001951 | Inverse variance weighted (multiplicative random effects) | 4 | 0.242925 | 0.271252 | 0.370484 | -0.28873 | 0.774579 | 1.274972 | 0.749215 | 2.169678 |
| ebi-a-GCST90001952 | finngen_R11_C3_OSTEOSARCOMA_EXALLC | Osteosarcoma (controls excluding all cancers) || id:finngen_R11_C3_OSTEOSARCOMA_EXALLC | CD33 on Monocytic Myeloid-Derived Suppressor Cells || id:ebi-a-GCST90001952 | Inverse variance weighted (multiplicative random effects) | 4 | 0.131302 | 0.23204 | 0.571488 | -0.3235 | 0.5861 | 1.140312 | 0.723615 | 1.796966 |
| ebi-a-GCST90001953 | finngen_R11_C3_OSTEOSARCOMA_EXALLC | Osteosarcoma (controls excluding all cancers) || id:finngen_R11_C3_OSTEOSARCOMA_EXALLC | CD33 on CD33dim HLA DR- || id:ebi-a-GCST90001953 | Inverse variance weighted | 6 | 0.025398 | 0.142403 | 0.858448 | -0.25371 | 0.304507 | 1.025723 | 0.775916 | 1.355956 |
| ebi-a-GCST90001954 | finngen_R11_C3_OSTEOSARCOMA_EXALLC | Osteosarcoma (controls excluding all cancers) || id:finngen_R11_C3_OSTEOSARCOMA_EXALLC | CD33 on basophil || id:ebi-a-GCST90001954 | Inverse variance weighted | 7 | 0.015 | 0.143631 | 0.916823 | -0.26652 | 0.296516 | 1.015113 | 0.766044 | 1.345164 |
| ebi-a-GCST90001955 | finngen_R11_C3_OSTEOSARCOMA_EXALLC | Osteosarcoma (controls excluding all cancers) || id:finngen_R11_C3_OSTEOSARCOMA_EXALLC | CD33 on Immature Myeloid-Derived Suppressor Cells || id:ebi-a-GCST90001955 | Inverse variance weighted | 6 | 0.026907 | 0.148603 | 0.856314 | -0.26436 | 0.31817 | 1.027273 | 0.767701 | 1.374609 |
| ebi-a-GCST90001956 | finngen_R11_C3_OSTEOSARCOMA_EXALLC | Osteosarcoma (controls excluding all cancers) || id:finngen_R11_C3_OSTEOSARCOMA_EXALLC | CD33 on CD33+ HLA DR+ || id:ebi-a-GCST90001956 | Inverse variance weighted (multiplicative random effects) | 4 | 0.12107 | 0.219737 | 0.58165 | -0.30961 | 0.551754 | 1.128704 | 0.73373 | 1.736296 |
| ebi-a-GCST90001957 | finngen_R11_C3_OSTEOSARCOMA_EXALLC | Osteosarcoma (controls excluding all cancers) || id:finngen_R11_C3_OSTEOSARCOMA_EXALLC | CD33 on CD33+ HLA DR+ CD14- || id:ebi-a-GCST90001957 | Inverse variance weighted (multiplicative random effects) | 4 | 0.120136 | 0.218809 | 0.582975 | -0.30873 | 0.549002 | 1.12765 | 0.734379 | 1.731523 |
| ebi-a-GCST90001959 | finngen_R11_C3_OSTEOSARCOMA_EXALLC | Osteosarcoma (controls excluding all cancers) || id:finngen_R11_C3_OSTEOSARCOMA_EXALLC | CD4 on HLA DR+ CD4+ T cell || id:ebi-a-GCST90001959 | Inverse variance weighted | 2 | 0.217177 | 0.746254 | 0.771034 | -1.24548 | 1.679834 | 1.242564 | 0.287803 | 5.364664 |
| ebi-a-GCST90001961 | finngen_R11_C3_OSTEOSARCOMA_EXALLC | Osteosarcoma (controls excluding all cancers) || id:finngen_R11_C3_OSTEOSARCOMA_EXALLC | CD25 on CD39+ CD4+ T cell || id:ebi-a-GCST90001961 | Inverse variance weighted | 5 | 0.078244 | 0.225308 | 0.728384 | -0.36336 | 0.519848 | 1.081387 | 0.695336 | 1.681771 |
| ebi-a-GCST90001963 | finngen_R11_C3_OSTEOSARCOMA_EXALLC | Osteosarcoma (controls excluding all cancers) || id:finngen_R11_C3_OSTEOSARCOMA_EXALLC | FSC-A on myeloid Dendritic Cell || id:ebi-a-GCST90001963 | Inverse variance weighted (multiplicative random effects) | 3 | 0.037645 | 0.90876 | 0.966957 | -1.74352 | 1.818816 | 1.038363 | 0.174903 | 6.164553 |
| ebi-a-GCST90001964 | finngen_R11_C3_OSTEOSARCOMA_EXALLC | Osteosarcoma (controls excluding all cancers) || id:finngen_R11_C3_OSTEOSARCOMA_EXALLC | FSC-A on plasmacytoid Dendritic Cell || id:ebi-a-GCST90001964 | Inverse variance weighted | 4 | -0.60322 | 0.656166 | 0.35793 | -1.88931 | 0.68286 | 0.547045 | 0.151176 | 1.979532 |
| ebi-a-GCST90001965 | finngen_R11_C3_OSTEOSARCOMA_EXALLC | Osteosarcoma (controls excluding all cancers) || id:finngen_R11_C3_OSTEOSARCOMA_EXALLC | FSC-A on monocyte || id:ebi-a-GCST90001965 | Inverse variance weighted | 2 | 0.266009 | 1.116054 | 0.811612 | -1.92146 | 2.453474 | 1.304746 | 0.146394 | 11.62868 |
| ebi-a-GCST90001966 | finngen_R11_C3_OSTEOSARCOMA_EXALLC | Osteosarcoma (controls excluding all cancers) || id:finngen_R11_C3_OSTEOSARCOMA_EXALLC | FSC-A on granulocyte || id:ebi-a-GCST90001966 | Inverse variance weighted | 2 | 0.1276 | 0.648592 | 0.844036 | -1.14364 | 1.398841 | 1.136099 | 0.318657 | 4.050502 |
| ebi-a-GCST90001969 | finngen_R11_C3_OSTEOSARCOMA_EXALLC | Osteosarcoma (controls excluding all cancers) || id:finngen_R11_C3_OSTEOSARCOMA_EXALLC | FSC-A on Natural Killer || id:ebi-a-GCST90001969 | Inverse variance weighted | 3 | -0.26495 | 0.57712 | 0.646168 | -1.39611 | 0.866204 | 0.767244 | 0.247559 | 2.377867 |
| ebi-a-GCST90001970 | finngen_R11_C3_OSTEOSARCOMA_EXALLC | Osteosarcoma (controls excluding all cancers) || id:finngen_R11_C3_OSTEOSARCOMA_EXALLC | FSC-A on HLA DR+ Natural Killer || id:ebi-a-GCST90001970 | Inverse variance weighted | 4 | -0.17758 | 0.396689 | 0.654395 | -0.95509 | 0.599927 | 0.837291 | 0.384776 | 1.821986 |
| ebi-a-GCST90001973 | finngen_R11_C3_OSTEOSARCOMA_EXALLC | Osteosarcoma (controls excluding all cancers) || id:finngen_R11_C3_OSTEOSARCOMA_EXALLC | FSC-A on CD4+ T cell || id:ebi-a-GCST90001973 | Inverse variance weighted | 3 | 0.04172 | 0.743697 | 0.955263 | -1.41593 | 1.499367 | 1.042603 | 0.242701 | 4.478854 |
| ebi-a-GCST90001976 | finngen_R11_C3_OSTEOSARCOMA_EXALLC | Osteosarcoma (controls excluding all cancers) || id:finngen_R11_C3_OSTEOSARCOMA_EXALLC | FSC-A on Natural Killer T || id:ebi-a-GCST90001976 | Inverse variance weighted | 2 | -0.31886 | 1.067597 | 0.765191 | -2.41135 | 1.773631 | 0.726977 | 0.089694 | 5.892207 |
| ebi-a-GCST90001979 | finngen_R11_C3_OSTEOSARCOMA_EXALLC | Osteosarcoma (controls excluding all cancers) || id:finngen_R11_C3_OSTEOSARCOMA_EXALLC | CD16 on CD14- CD16+ monocyte || id:ebi-a-GCST90001979 | Inverse variance weighted | 8 | -0.18602 | 0.221018 | 0.39999 | -0.61921 | 0.247177 | 0.830259 | 0.538369 | 1.280406 |
| ebi-a-GCST90001980 | finngen_R11_C3_OSTEOSARCOMA_EXALLC | Osteosarcoma (controls excluding all cancers) || id:finngen_R11_C3_OSTEOSARCOMA_EXALLC | CD40 on CD14+ CD16- monocyte || id:ebi-a-GCST90001980 | Inverse variance weighted | 4 | -0.06961 | 0.251454 | 0.781912 | -0.56246 | 0.42324 | 0.932758 | 0.569806 | 1.526901 |
| ebi-a-GCST90001981 | finngen_R11_C3_OSTEOSARCOMA_EXALLC | Osteosarcoma (controls excluding all cancers) || id:finngen_R11_C3_OSTEOSARCOMA_EXALLC | CD40 on CD14+ CD16+ monocyte || id:ebi-a-GCST90001981 | Inverse variance weighted | 5 | -0.01501 | 0.223132 | 0.946376 | -0.45235 | 0.422331 | 0.985104 | 0.636134 | 1.525513 |
| ebi-a-GCST90001983 | finngen_R11_C3_OSTEOSARCOMA_EXALLC | Osteosarcoma (controls excluding all cancers) || id:finngen_R11_C3_OSTEOSARCOMA_EXALLC | CD14 on CD14+ CD16+ monocyte || id:ebi-a-GCST90001983 | Inverse variance weighted | 2 | 0.345024 | 0.719886 | 0.631742 | -1.06595 | 1.756 | 1.412024 | 0.3444 | 5.789237 |
| ebi-a-GCST90001984 | finngen_R11_C3_OSTEOSARCOMA_EXALLC | Osteosarcoma (controls excluding all cancers) || id:finngen_R11_C3_OSTEOSARCOMA_EXALLC | HLA DR on CD14- CD16+ monocyte || id:ebi-a-GCST90001984 | Inverse variance weighted | 8 | -0.15379 | 0.228021 | 0.500013 | -0.60071 | 0.293128 | 0.857449 | 0.54842 | 1.340614 |
| ebi-a-GCST90001985 | finngen_R11_C3_OSTEOSARCOMA_EXALLC | Osteosarcoma (controls excluding all cancers) || id:finngen_R11_C3_OSTEOSARCOMA_EXALLC | CD40 on monocytes || id:ebi-a-GCST90001985 | Inverse variance weighted | 5 | -0.11349 | 0.304447 | 0.709329 | -0.7102 | 0.483232 | 0.892718 | 0.491545 | 1.621305 |
| ebi-a-GCST90001987 | finngen_R11_C3_OSTEOSARCOMA_EXALLC | Osteosarcoma (controls excluding all cancers) || id:finngen_R11_C3_OSTEOSARCOMA_EXALLC | CD64 on CD14+ CD16- monocyte || id:ebi-a-GCST90001987 | Inverse variance weighted | 8 | -0.07672 | 0.196047 | 0.695533 | -0.46098 | 0.307527 | 0.926145 | 0.630668 | 1.360058 |
| ebi-a-GCST90001988 | finngen_R11_C3_OSTEOSARCOMA_EXALLC | Osteosarcoma (controls excluding all cancers) || id:finngen_R11_C3_OSTEOSARCOMA_EXALLC | HLA DR on CD14+ CD16- monocyte || id:ebi-a-GCST90001988 | Inverse variance weighted | 5 | -0.04689 | 0.274977 | 0.864588 | -0.58585 | 0.492062 | 0.954189 | 0.556633 | 1.635685 |
| ebi-a-GCST90001989 | finngen_R11_C3_OSTEOSARCOMA_EXALLC | Osteosarcoma (controls excluding all cancers) || id:finngen_R11_C3_OSTEOSARCOMA_EXALLC | CD40 on CD14- CD16+ monocyte || id:ebi-a-GCST90001989 | Inverse variance weighted | 9 | 0.020492 | 0.204879 | 0.920328 | -0.38107 | 0.422055 | 1.020703 | 0.683129 | 1.525093 |
| ebi-a-GCST90001990 | finngen_R11_C3_OSTEOSARCOMA_EXALLC | Osteosarcoma (controls excluding all cancers) || id:finngen_R11_C3_OSTEOSARCOMA_EXALLC | CD64 on CD14- CD16+ monocyte || id:ebi-a-GCST90001990 | Inverse variance weighted | 2 | -0.37258 | 1.119129 | 0.739193 | -2.56607 | 1.820909 | 0.688952 | 0.076837 | 6.177471 |
| ebi-a-GCST90001991 | finngen_R11_C3_OSTEOSARCOMA_EXALLC | Osteosarcoma (controls excluding all cancers) || id:finngen_R11_C3_OSTEOSARCOMA_EXALLC | HLA DR on CD14+ monocyte || id:ebi-a-GCST90001991 | Inverse variance weighted | 5 | -0.0491 | 0.283279 | 0.86239 | -0.60433 | 0.506125 | 0.952085 | 0.546442 | 1.658851 |
| ebi-a-GCST90001992 | finngen_R11_C3_OSTEOSARCOMA_EXALLC | Osteosarcoma (controls excluding all cancers) || id:finngen_R11_C3_OSTEOSARCOMA_EXALLC | CCR2 on CD14+ CD16+ monocyte || id:ebi-a-GCST90001992 | Inverse variance weighted | 2 | -0.10102 | 1.203521 | 0.933107 | -2.45992 | 2.257882 | 0.903916 | 0.085442 | 9.562813 |
| ebi-a-GCST90001994 | finngen_R11_C3_OSTEOSARCOMA_EXALLC | Osteosarcoma (controls excluding all cancers) || id:finngen_R11_C3_OSTEOSARCOMA_EXALLC | CX3CR1 on CD14- CD16- || id:ebi-a-GCST90001994 | Inverse variance weighted | 3 | 0.37744 | 0.559579 | 0.499989 | -0.71934 | 1.474214 | 1.458545 | 0.487076 | 4.367603 |
| ebi-a-GCST90001995 | finngen_R11_C3_OSTEOSARCOMA_EXALLC | Osteosarcoma (controls excluding all cancers) || id:finngen_R11_C3_OSTEOSARCOMA_EXALLC | CX3CR1 on monocyte || id:ebi-a-GCST90001995 | Inverse variance weighted | 3 | -0.24858 | 0.333767 | 0.456406 | -0.90276 | 0.405601 | 0.779906 | 0.405447 | 1.500204 |
| ebi-a-GCST90001996 | finngen_R11_C3_OSTEOSARCOMA_EXALLC | Osteosarcoma (controls excluding all cancers) || id:finngen_R11_C3_OSTEOSARCOMA_EXALLC | CX3CR1 on CD14+ CD16+ monocyte || id:ebi-a-GCST90001996 | Inverse variance weighted | 3 | -0.28237 | 0.331195 | 0.393895 | -0.93151 | 0.366773 | 0.753996 | 0.393958 | 1.443071 |
| ebi-a-GCST90001997 | finngen_R11_C3_OSTEOSARCOMA_EXALLC | Osteosarcoma (controls excluding all cancers) || id:finngen_R11_C3_OSTEOSARCOMA_EXALLC | CX3CR1 on CD14+ CD16- monocyte || id:ebi-a-GCST90001997 | Inverse variance weighted | 3 | -0.24092 | 0.303327 | 0.427046 | -0.83544 | 0.353602 | 0.785905 | 0.433683 | 1.424188 |
| ebi-a-GCST90001999 | finngen_R11_C3_OSTEOSARCOMA_EXALLC | Osteosarcoma (controls excluding all cancers) || id:finngen_R11_C3_OSTEOSARCOMA_EXALLC | PDL-1 on CD14- CD16+ monocyte || id:ebi-a-GCST90001999 | Inverse variance weighted | 2 | -0.16488 | 0.455426 | 0.717332 | -1.05751 | 0.727759 | 0.847998 | 0.347319 | 2.070435 |
| ebi-a-GCST90002001 | finngen_R11_C3_OSTEOSARCOMA_EXALLC | Osteosarcoma (controls excluding all cancers) || id:finngen_R11_C3_OSTEOSARCOMA_EXALLC | CD64 on CD14- CD16- || id:ebi-a-GCST90002001 | Inverse variance weighted | 3 | -0.71031 | 0.555859 | 0.201296 | -1.7998 | 0.37917 | 0.49149 | 0.165332 | 1.461071 |
| ebi-a-GCST90002002 | finngen_R11_C3_OSTEOSARCOMA_EXALLC | Osteosarcoma (controls excluding all cancers) || id:finngen_R11_C3_OSTEOSARCOMA_EXALLC | PDL-1 on monocyte || id:ebi-a-GCST90002002 | Inverse variance weighted | 2 | -0.67791 | 0.52039 | 0.192681 | -1.69787 | 0.342058 | 0.507678 | 0.183073 | 1.407842 |
| ebi-a-GCST90002003 | finngen_R11_C3_OSTEOSARCOMA_EXALLC | Osteosarcoma (controls excluding all cancers) || id:finngen_R11_C3_OSTEOSARCOMA_EXALLC | CCR2 on CD14- CD16- || id:ebi-a-GCST90002003 | Inverse variance weighted | 3 | 0.250628 | 0.707411 | 0.723122 | -1.1359 | 1.637153 | 1.284833 | 0.321134 | 5.140515 |
| ebi-a-GCST90002004 | finngen_R11_C3_OSTEOSARCOMA_EXALLC | Osteosarcoma (controls excluding all cancers) || id:finngen_R11_C3_OSTEOSARCOMA_EXALLC | CCR2 on CD14+ CD16- monocyte || id:ebi-a-GCST90002004 | Inverse variance weighted | 3 | 0.464859 | 0.508488 | 0.360612 | -0.53178 | 1.461495 | 1.59179 | 0.58756 | 4.312401 |
| ebi-a-GCST90002005 | finngen_R11_C3_OSTEOSARCOMA_EXALLC | Osteosarcoma (controls excluding all cancers) || id:finngen_R11_C3_OSTEOSARCOMA_EXALLC | CD16 on CD14+ CD16+ monocyte || id:ebi-a-GCST90002005 | Inverse variance weighted | 5 | -0.31818 | 0.378055 | 0.400003 | -1.05916 | 0.42281 | 0.727474 | 0.346746 | 1.526245 |
| ebi-a-GCST90002006 | finngen_R11_C3_OSTEOSARCOMA_EXALLC | Osteosarcoma (controls excluding all cancers) || id:finngen_R11_C3_OSTEOSARCOMA_EXALLC | CD64 on monocyte || id:ebi-a-GCST90002006 | Inverse variance weighted | 8 | -0.08359 | 0.210535 | 0.691353 | -0.49624 | 0.329062 | 0.919811 | 0.608818 | 1.389664 |
| ebi-a-GCST90002007 | finngen_R11_C3_OSTEOSARCOMA_EXALLC | Osteosarcoma (controls excluding all cancers) || id:finngen_R11_C3_OSTEOSARCOMA_EXALLC | HLA DR on CD14+ CD16+ monocyte || id:ebi-a-GCST90002007 | Inverse variance weighted | 5 | 0.098895 | 0.253832 | 0.696826 | -0.39861 | 0.596405 | 1.10395 | 0.671249 | 1.81558 |
| ebi-a-GCST90002008 | finngen_R11_C3_OSTEOSARCOMA_EXALLC | Osteosarcoma (controls excluding all cancers) || id:finngen_R11_C3_OSTEOSARCOMA_EXALLC | CCR2 on monocyte || id:ebi-a-GCST90002008 | Inverse variance weighted | 2 | 0.687799 | 0.910531 | 0.45002 | -1.09684 | 2.47244 | 1.989333 | 0.333924 | 11.85133 |
| ebi-a-GCST90002009 | finngen_R11_C3_OSTEOSARCOMA_EXALLC | Osteosarcoma (controls excluding all cancers) || id:finngen_R11_C3_OSTEOSARCOMA_EXALLC | HLA DR on CD14- CD16- || id:ebi-a-GCST90002009 | Inverse variance weighted | 4 | -0.5184 | 0.446765 | 0.245912 | -1.39406 | 0.357263 | 0.595474 | 0.248067 | 1.429411 |
| ebi-a-GCST90002010 | finngen_R11_C3_OSTEOSARCOMA_EXALLC | Osteosarcoma (controls excluding all cancers) || id:finngen_R11_C3_OSTEOSARCOMA_EXALLC | HLA DR on monocyte || id:ebi-a-GCST90002010 | Inverse variance weighted | 4 | -0.15633 | 0.237173 | 0.509795 | -0.62119 | 0.308524 | 0.855273 | 0.537303 | 1.361415 |
| ebi-a-GCST90002011 | finngen_R11_C3_OSTEOSARCOMA_EXALLC | Osteosarcoma (controls excluding all cancers) || id:finngen_R11_C3_OSTEOSARCOMA_EXALLC | CD64 on CD14+ CD16+ monocyte || id:ebi-a-GCST90002011 | Inverse variance weighted | 2 | -1.44475 | 1.13113 | 0.201509 | -3.66177 | 0.772261 | 0.235804 | 0.025687 | 2.164656 |
| ebi-a-GCST90002013 | finngen_R11_C3_OSTEOSARCOMA_EXALLC | Osteosarcoma (controls excluding all cancers) || id:finngen_R11_C3_OSTEOSARCOMA_EXALLC | CCR2 on myeloid Dendritic Cell || id:ebi-a-GCST90002013 | Inverse variance weighted | 3 | 0.039327 | 0.39491 | 0.920674 | -0.7347 | 0.813351 | 1.040111 | 0.479651 | 2.255454 |
| ebi-a-GCST90002014 | finngen_R11_C3_OSTEOSARCOMA_EXALLC | Osteosarcoma (controls excluding all cancers) || id:finngen_R11_C3_OSTEOSARCOMA_EXALLC | CCR2 on CD62L+ myeloid Dendritic Cell || id:ebi-a-GCST90002014 | Inverse variance weighted | 3 | 0.150638 | 0.401297 | 0.70738 | -0.6359 | 0.93718 | 1.162575 | 0.529456 | 2.552772 |
| ebi-a-GCST90002015 | finngen_R11_C3_OSTEOSARCOMA_EXALLC | Osteosarcoma (controls excluding all cancers) || id:finngen_R11_C3_OSTEOSARCOMA_EXALLC | CCR2 on plasmacytoid Dendritic Cell || id:ebi-a-GCST90002015 | Inverse variance weighted | 2 | 0.33641 | 0.423958 | 0.427487 | -0.49455 | 1.167367 | 1.399913 | 0.609847 | 3.21352 |
| ebi-a-GCST90002016 | finngen_R11_C3_OSTEOSARCOMA_EXALLC | Osteosarcoma (controls excluding all cancers) || id:finngen_R11_C3_OSTEOSARCOMA_EXALLC | CCR2 on CD62L+ plasmacytoid Dendritic Cell || id:ebi-a-GCST90002016 | Inverse variance weighted | 2 | 0.337306 | 0.424953 | 0.427342 | -0.4956 | 1.170215 | 1.401168 | 0.609204 | 3.222685 |
| ebi-a-GCST90002017 | finngen_R11_C3_OSTEOSARCOMA_EXALLC | Osteosarcoma (controls excluding all cancers) || id:finngen_R11_C3_OSTEOSARCOMA_EXALLC | CCR2 on monocyte || id:ebi-a-GCST90002017 | Inverse variance weighted | 2 | 0.317864 | 0.418031 | 0.447025 | -0.50148 | 1.137204 | 1.374189 | 0.605636 | 3.118039 |
| ebi-a-GCST90002018 | finngen_R11_C3_OSTEOSARCOMA_EXALLC | Osteosarcoma (controls excluding all cancers) || id:finngen_R11_C3_OSTEOSARCOMA_EXALLC | CCR2 on granulocyte || id:ebi-a-GCST90002018 | Inverse variance weighted | 2 | 0.111366 | 0.811776 | 0.890882 | -1.47971 | 1.702447 | 1.117804 | 0.227703 | 5.487356 |
| ebi-a-GCST90002023 | finngen_R11_C3_OSTEOSARCOMA_EXALLC | Osteosarcoma (controls excluding all cancers) || id:finngen_R11_C3_OSTEOSARCOMA_EXALLC | CD4 on Central Memory CD4+ T cell || id:ebi-a-GCST90002023 | Inverse variance weighted | 2 | -0.0135 | 0.508812 | 0.978836 | -1.01077 | 0.983774 | 0.986593 | 0.363939 | 2.67453 |
| ebi-a-GCST90002024 | finngen_R11_C3_OSTEOSARCOMA_EXALLC | Osteosarcoma (controls excluding all cancers) || id:finngen_R11_C3_OSTEOSARCOMA_EXALLC | CD4 on naive CD4+ T cell || id:ebi-a-GCST90002024 | Inverse variance weighted | 5 | -0.39301 | 0.602505 | 0.514209 | -1.57392 | 0.787897 | 0.67502 | 0.207231 | 2.198769 |
| ebi-a-GCST90002025 | finngen_R11_C3_OSTEOSARCOMA_EXALLC | Osteosarcoma (controls excluding all cancers) || id:finngen_R11_C3_OSTEOSARCOMA_EXALLC | CD4 on Effector Memory CD4+ T cell || id:ebi-a-GCST90002025 | Inverse variance weighted | 3 | 0.189982 | 0.404994 | 0.639 | -0.60381 | 0.983771 | 1.209227 | 0.546726 | 2.674522 |
| ebi-a-GCST90002027 | finngen_R11_C3_OSTEOSARCOMA_EXALLC | Osteosarcoma (controls excluding all cancers) || id:finngen_R11_C3_OSTEOSARCOMA_EXALLC | CD4 on CD45RA+ CD4+ T cell || id:ebi-a-GCST90002027 | Inverse variance weighted | 2 | -0.01512 | 0.46988 | 0.974322 | -0.93609 | 0.90584 | 0.984989 | 0.392158 | 2.47401 |
| ebi-a-GCST90002029 | finngen_R11_C3_OSTEOSARCOMA_EXALLC | Osteosarcoma (controls excluding all cancers) || id:finngen_R11_C3_OSTEOSARCOMA_EXALLC | CD39 on CD39+ CD8+ T cell || id:ebi-a-GCST90002029 | Inverse variance weighted | 2 | 0.253476 | 0.658662 | 0.70036 | -1.0375 | 1.544453 | 1.288496 | 0.354339 | 4.685409 |
| ebi-a-GCST90002030 | finngen_R11_C3_OSTEOSARCOMA_EXALLC | Osteosarcoma (controls excluding all cancers) || id:finngen_R11_C3_OSTEOSARCOMA_EXALLC | CD39 on CD39+ activated CD4 regulatory T cell || id:ebi-a-GCST90002030 | Inverse variance weighted | 6 | -0.02628 | 0.126906 | 0.835924 | -0.27502 | 0.222452 | 0.974059 | 0.759558 | 1.249136 |
| ebi-a-GCST90002031 | finngen_R11_C3_OSTEOSARCOMA_EXALLC | Osteosarcoma (controls excluding all cancers) || id:finngen_R11_C3_OSTEOSARCOMA_EXALLC | CD39 on CD39+ secreting CD4 regulatory T cell || id:ebi-a-GCST90002031 | Inverse variance weighted | 6 | -0.02993 | 0.146923 | 0.838601 | -0.31789 | 0.258043 | 0.970518 | 0.72768 | 1.294394 |
| ebi-a-GCST90002032 | finngen_R11_C3_OSTEOSARCOMA_EXALLC | Osteosarcoma (controls excluding all cancers) || id:finngen_R11_C3_OSTEOSARCOMA_EXALLC | CD39 on CD39+ CD4+ T cell || id:ebi-a-GCST90002032 | Inverse variance weighted | 5 | -0.03386 | 0.146135 | 0.81677 | -0.32028 | 0.252564 | 0.966707 | 0.725943 | 1.287322 |
| ebi-a-GCST90002033 | finngen_R11_C3_OSTEOSARCOMA_EXALLC | Osteosarcoma (controls excluding all cancers) || id:finngen_R11_C3_OSTEOSARCOMA_EXALLC | CD39 on granulocyte || id:ebi-a-GCST90002033 | Inverse variance weighted | 2 | -0.15132 | 0.99022 | 0.878547 | -2.09215 | 1.789514 | 0.859576 | 0.123422 | 5.986542 |
| ebi-a-GCST90002034 | finngen_R11_C3_OSTEOSARCOMA_EXALLC | Osteosarcoma (controls excluding all cancers) || id:finngen_R11_C3_OSTEOSARCOMA_EXALLC | CD39 on monocyte || id:ebi-a-GCST90002034 | Inverse variance weighted | 2 | 1.020567 | 1.03769 | 0.325362 | -1.0133 | 3.054438 | 2.774767 | 0.363017 | 21.20927 |
| ebi-a-GCST90002035 | finngen_R11_C3_OSTEOSARCOMA_EXALLC | Osteosarcoma (controls excluding all cancers) || id:finngen_R11_C3_OSTEOSARCOMA_EXALLC | CD80 on myeloid Dendritic Cell || id:ebi-a-GCST90002035 | Inverse variance weighted | 4 | 1.004029 | 0.469392 | 0.032436 | 0.084021 | 1.924037 | 2.729256 | 1.087651 | 6.84855 |
| ebi-a-GCST90002036 | finngen_R11_C3_OSTEOSARCOMA_EXALLC | Osteosarcoma (controls excluding all cancers) || id:finngen_R11_C3_OSTEOSARCOMA_EXALLC | CD80 on CD62L+ myeloid Dendritic Cell || id:ebi-a-GCST90002036 | Inverse variance weighted | 3 | 1.180765 | 0.526771 | 0.024993 | 0.148294 | 2.213235 | 3.256863 | 1.159854 | 9.145252 |
| ebi-a-GCST90002037 | finngen_R11_C3_OSTEOSARCOMA_EXALLC | Osteosarcoma (controls excluding all cancers) || id:finngen_R11_C3_OSTEOSARCOMA_EXALLC | CD80 on plasmacytoid Dendritic Cell || id:ebi-a-GCST90002037 | Inverse variance weighted | 2 | 0.09581 | 0.587978 | 0.870558 | -1.05663 | 1.248247 | 1.10055 | 0.347627 | 3.48423 |
| ebi-a-GCST90002038 | finngen_R11_C3_OSTEOSARCOMA_EXALLC | Osteosarcoma (controls excluding all cancers) || id:finngen_R11_C3_OSTEOSARCOMA_EXALLC | CD80 on CD62L+ plasmacytoid Dendritic Cell || id:ebi-a-GCST90002038 | Inverse variance weighted | 2 | 0.096368 | 0.593021 | 0.870909 | -1.06595 | 1.258689 | 1.101164 | 0.3444 | 3.520803 |
| ebi-a-GCST90002039 | finngen_R11_C3_OSTEOSARCOMA_EXALLC | Osteosarcoma (controls excluding all cancers) || id:finngen_R11_C3_OSTEOSARCOMA_EXALLC | CD80 on monocyte || id:ebi-a-GCST90002039 | Inverse variance weighted (multiplicative random effects) | 6 | 0.149675 | 0.459432 | 0.744589 | -0.75081 | 1.050162 | 1.161457 | 0.471983 | 2.858113 |
| ebi-a-GCST90002040 | finngen_R11_C3_OSTEOSARCOMA_EXALLC | Osteosarcoma (controls excluding all cancers) || id:finngen_R11_C3_OSTEOSARCOMA_EXALLC | CD80 on granulocyte || id:ebi-a-GCST90002040 | Inverse variance weighted | 3 | 0.730638 | 0.737969 | 0.322142 | -0.71578 | 2.177056 | 2.076404 | 0.48881 | 8.820305 |
| ebi-a-GCST90002045 | finngen_R11_C3_OSTEOSARCOMA_EXALLC | Osteosarcoma (controls excluding all cancers) || id:finngen_R11_C3_OSTEOSARCOMA_EXALLC | CD45 on CD33- HLA DR- || id:ebi-a-GCST90002045 | Inverse variance weighted | 2 | 0.067889 | 0.926611 | 0.941595 | -1.74827 | 1.884047 | 1.070246 | 0.174075 | 6.58008 |
| ebi-a-GCST90002046 | finngen_R11_C3_OSTEOSARCOMA_EXALLC | Osteosarcoma (controls excluding all cancers) || id:finngen_R11_C3_OSTEOSARCOMA_EXALLC | CD45 on CD33- HLA DR+ || id:ebi-a-GCST90002046 | Inverse variance weighted | 2 | -0.02131 | 0.418744 | 0.959418 | -0.84205 | 0.79943 | 0.978918 | 0.430828 | 2.224274 |
| ebi-a-GCST90002052 | finngen_R11_C3_OSTEOSARCOMA_EXALLC | Osteosarcoma (controls excluding all cancers) || id:finngen_R11_C3_OSTEOSARCOMA_EXALLC | CD45 on Immature Myeloid-Derived Suppressor Cells || id:ebi-a-GCST90002052 | Inverse variance weighted | 2 | -0.10397 | 0.303334 | 0.731772 | -0.69851 | 0.49056 | 0.901249 | 0.497327 | 1.633231 |
| ebi-a-GCST90002054 | finngen_R11_C3_OSTEOSARCOMA_EXALLC | Osteosarcoma (controls excluding all cancers) || id:finngen_R11_C3_OSTEOSARCOMA_EXALLC | CD8 on Central Memory CD8+ T cell || id:ebi-a-GCST90002054 | Inverse variance weighted | 3 | 0.088181 | 0.505439 | 0.861501 | -0.90248 | 1.07884 | 1.092185 | 0.405563 | 2.941267 |
| ebi-a-GCST90002055 | finngen_R11_C3_OSTEOSARCOMA_EXALLC | Osteosarcoma (controls excluding all cancers) || id:finngen_R11_C3_OSTEOSARCOMA_EXALLC | CD8 on naive CD8+ T cell || id:ebi-a-GCST90002055 | Inverse variance weighted | 2 | -0.15569 | 0.432012 | 0.718561 | -1.00243 | 0.691054 | 0.855825 | 0.366986 | 1.995817 |
| ebi-a-GCST90002056 | finngen_R11_C3_OSTEOSARCOMA_EXALLC | Osteosarcoma (controls excluding all cancers) || id:finngen_R11_C3_OSTEOSARCOMA_EXALLC | CD8 on Effector Memory CD8+ T cell || id:ebi-a-GCST90002056 | Inverse variance weighted | 4 | 0.056625 | 0.378133 | 0.880962 | -0.68452 | 0.797766 | 1.058259 | 0.504335 | 2.220574 |
| ebi-a-GCST90002057 | finngen_R11_C3_OSTEOSARCOMA_EXALLC | Osteosarcoma (controls excluding all cancers) || id:finngen_R11_C3_OSTEOSARCOMA_EXALLC | CD8 on Terminally Differentiated CD8+ T cell || id:ebi-a-GCST90002057 | Inverse variance weighted | 2 | 0.106157 | 0.445681 | 0.811732 | -0.76738 | 0.979692 | 1.111997 | 0.464229 | 2.663635 |
| ebi-a-GCST90002058 | finngen_R11_C3_OSTEOSARCOMA_EXALLC | Osteosarcoma (controls excluding all cancers) || id:finngen_R11_C3_OSTEOSARCOMA_EXALLC | CD8 on CD8+ T cell || id:ebi-a-GCST90002058 | Inverse variance weighted | 2 | 0.08943 | 0.493374 | 0.856163 | -0.87758 | 1.056442 | 1.09355 | 0.415786 | 2.876121 |
| ebi-a-GCST90002059 | finngen_R11_C3_OSTEOSARCOMA_EXALLC | Osteosarcoma (controls excluding all cancers) || id:finngen_R11_C3_OSTEOSARCOMA_EXALLC | CD8 on Natural Killer T || id:ebi-a-GCST90002059 | Inverse variance weighted | 2 | -0.41475 | 0.706388 | 0.557112 | -1.79927 | 0.969774 | 0.660508 | 0.16542 | 2.637348 |
| ebi-a-GCST90002060 | finngen_R11_C3_OSTEOSARCOMA_EXALLC | Osteosarcoma (controls excluding all cancers) || id:finngen_R11_C3_OSTEOSARCOMA_EXALLC | CD8 on HLA DR+ CD8+ T cell || id:ebi-a-GCST90002060 | Inverse variance weighted | 2 | 0.003119 | 0.71462 | 0.996517 | -1.39754 | 1.403775 | 1.003124 | 0.247205 | 4.070539 |
| ebi-a-GCST90002061 | finngen_R11_C3_OSTEOSARCOMA_EXALLC | Osteosarcoma (controls excluding all cancers) || id:finngen_R11_C3_OSTEOSARCOMA_EXALLC | CD4 on CD39+ CD4+ T cell || id:ebi-a-GCST90002061 | Inverse variance weighted | 7 | -0.14254 | 0.286378 | 0.618669 | -0.70384 | 0.41876 | 0.867152 | 0.494681 | 1.520075 |
| ebi-a-GCST90002062 | finngen_R11_C3_OSTEOSARCOMA_EXALLC | Osteosarcoma (controls excluding all cancers) || id:finngen_R11_C3_OSTEOSARCOMA_EXALLC | CD4 on CD28+ CD4+ T cell || id:ebi-a-GCST90002062 | Inverse variance weighted | 2 | 0.44453 | 0.646351 | 0.491608 | -0.82232 | 1.711379 | 1.559757 | 0.439412 | 5.536591 |
| ebi-a-GCST90002067 | finngen_R11_C3_OSTEOSARCOMA_EXALLC | Osteosarcoma (controls excluding all cancers) || id:finngen_R11_C3_OSTEOSARCOMA_EXALLC | CD4 on CD39+ activated CD4 regulatory T cell || id:ebi-a-GCST90002067 | Inverse variance weighted | 4 | 0.502056 | 0.476998 | 0.292555 | -0.43286 | 1.436972 | 1.652115 | 0.648651 | 4.207936 |
| ebi-a-GCST90002069 | finngen_R11_C3_OSTEOSARCOMA_EXALLC | Osteosarcoma (controls excluding all cancers) || id:finngen_R11_C3_OSTEOSARCOMA_EXALLC | CD4 on CD39+ secreting CD4 regulatory T cell || id:ebi-a-GCST90002069 | Inverse variance weighted | 3 | -0.11276 | 0.439775 | 0.797641 | -0.97472 | 0.7492 | 0.893366 | 0.377299 | 2.115307 |
| ebi-a-GCST90002071 | finngen_R11_C3_OSTEOSARCOMA_EXALLC | Osteosarcoma (controls excluding all cancers) || id:finngen_R11_C3_OSTEOSARCOMA_EXALLC | SSC-A on myeloid Dendritic Cell || id:ebi-a-GCST90002071 | Inverse variance weighted | 6 | 0.745867 | 0.615829 | 0.225835 | -0.46116 | 1.952893 | 2.108269 | 0.630553 | 7.049048 |
| ebi-a-GCST90002072 | finngen_R11_C3_OSTEOSARCOMA_EXALLC | Osteosarcoma (controls excluding all cancers) || id:finngen_R11_C3_OSTEOSARCOMA_EXALLC | SSC-A on plasmacytoid Dendritic Cell || id:ebi-a-GCST90002072 | Inverse variance weighted | 5 | 0.140549 | 0.552215 | 0.799095 | -0.94179 | 1.222891 | 1.150906 | 0.389928 | 3.396995 |
| ebi-a-GCST90002073 | finngen_R11_C3_OSTEOSARCOMA_EXALLC | Osteosarcoma (controls excluding all cancers) || id:finngen_R11_C3_OSTEOSARCOMA_EXALLC | SSC-A on monocyte || id:ebi-a-GCST90002073 | Inverse variance weighted | 8 | -0.26012 | 0.230137 | 0.258354 | -0.71119 | 0.190947 | 0.770958 | 0.491059 | 1.210395 |
| ebi-a-GCST90002074 | finngen_R11_C3_OSTEOSARCOMA_EXALLC | Osteosarcoma (controls excluding all cancers) || id:finngen_R11_C3_OSTEOSARCOMA_EXALLC | SSC-A on CD14+ monocyte || id:ebi-a-GCST90002074 | Inverse variance weighted | 6 | -0.31106 | 0.284826 | 0.274788 | -0.86932 | 0.2472 | 0.73267 | 0.419237 | 1.280435 |
| ebi-a-GCST90002077 | finngen_R11_C3_OSTEOSARCOMA_EXALLC | Osteosarcoma (controls excluding all cancers) || id:finngen_R11_C3_OSTEOSARCOMA_EXALLC | SSC-A on HLA DR+ Natural Killer || id:ebi-a-GCST90002077 | Inverse variance weighted | 3 | -0.02978 | 0.407973 | 0.941804 | -0.82941 | 0.769845 | 0.970656 | 0.436306 | 2.159431 |
| ebi-a-GCST90002078 | finngen_R11_C3_OSTEOSARCOMA_EXALLC | Osteosarcoma (controls excluding all cancers) || id:finngen_R11_C3_OSTEOSARCOMA_EXALLC | SSC-A on granulocyte || id:ebi-a-GCST90002078 | Inverse variance weighted | 3 | -0.32987 | 0.507487 | 0.515683 | -1.32455 | 0.664802 | 0.719015 | 0.265923 | 1.944105 |
| ebi-a-GCST90002081 | finngen_R11_C3_OSTEOSARCOMA_EXALLC | Osteosarcoma (controls excluding all cancers) || id:finngen_R11_C3_OSTEOSARCOMA_EXALLC | SSC-A on CD4+ T cell || id:ebi-a-GCST90002081 | Inverse variance weighted | 4 | -0.33577 | 0.532677 | 0.528469 | -1.37982 | 0.708277 | 0.714787 | 0.251624 | 2.03049 |
| ebi-a-GCST90002084 | finngen_R11_C3_OSTEOSARCOMA_EXALLC | Osteosarcoma (controls excluding all cancers) || id:finngen_R11_C3_OSTEOSARCOMA_EXALLC | SSC-A on Natural Killer T || id:ebi-a-GCST90002084 | Inverse variance weighted | 2 | 0.784188 | 0.886873 | 0.376579 | -0.95408 | 2.52246 | 2.190628 | 0.385165 | 12.45921 |
| ebi-a-GCST90002087 | finngen_R11_C3_OSTEOSARCOMA_EXALLC | Osteosarcoma (controls excluding all cancers) || id:finngen_R11_C3_OSTEOSARCOMA_EXALLC | CD11c on myeloid Dendritic Cell || id:ebi-a-GCST90002087 | Inverse variance weighted | 5 | -0.19017 | 0.482763 | 0.693639 | -1.13639 | 0.756045 | 0.826818 | 0.320977 | 2.129837 |
| ebi-a-GCST90002088 | finngen_R11_C3_OSTEOSARCOMA_EXALLC | Osteosarcoma (controls excluding all cancers) || id:finngen_R11_C3_OSTEOSARCOMA_EXALLC | CD11c on CD62L+ myeloid Dendritic Cell || id:ebi-a-GCST90002088 | Inverse variance weighted | 2 | 0.265404 | 0.651544 | 0.683754 | -1.01162 | 1.54243 | 1.303957 | 0.363629 | 4.675938 |
| ebi-a-GCST90002089 | finngen_R11_C3_OSTEOSARCOMA_EXALLC | Osteosarcoma (controls excluding all cancers) || id:finngen_R11_C3_OSTEOSARCOMA_EXALLC | CD11c on monocyte || id:ebi-a-GCST90002089 | Inverse variance weighted | 2 | 0.282845 | 0.670212 | 0.673008 | -1.03077 | 1.59646 | 1.326899 | 0.356732 | 4.935531 |
| ebi-a-GCST90002090 | finngen_R11_C3_OSTEOSARCOMA_EXALLC | Osteosarcoma (controls excluding all cancers) || id:finngen_R11_C3_OSTEOSARCOMA_EXALLC | CD11c on granulocyte || id:ebi-a-GCST90002090 | Inverse variance weighted | 3 | 0.68112 | 0.407961 | 0.095005 | -0.11848 | 1.480724 | 1.976089 | 0.888266 | 4.396126 |
| ebi-a-GCST90002098 | finngen_R11_C3_OSTEOSARCOMA_EXALLC | Osteosarcoma (controls excluding all cancers) || id:finngen_R11_C3_OSTEOSARCOMA_EXALLC | CD45RA on naive CD4+ T cell || id:ebi-a-GCST90002098 | Inverse variance weighted | 10 | -0.08149 | 0.183565 | 0.657076 | -0.44128 | 0.278292 | 0.921738 | 0.643212 | 1.320872 |
| ebi-a-GCST90002099 | finngen_R11_C3_OSTEOSARCOMA_EXALLC | Osteosarcoma (controls excluding all cancers) || id:finngen_R11_C3_OSTEOSARCOMA_EXALLC | CD4RA on Terminally Differentiated CD4+ T cell || id:ebi-a-GCST90002099 | Inverse variance weighted | 3 | 0.20127 | 0.241976 | 0.405535 | -0.273 | 0.675544 | 1.222955 | 0.76109 | 1.965102 |
| ebi-a-GCST90002100 | finngen_R11_C3_OSTEOSARCOMA_EXALLC | Osteosarcoma (controls excluding all cancers) || id:finngen_R11_C3_OSTEOSARCOMA_EXALLC | CD45RA on naive CD8+ T cell || id:ebi-a-GCST90002100 | Inverse variance weighted | 2 | 1.029326 | 0.849639 | 0.225709 | -0.63597 | 2.694619 | 2.799178 | 0.529423 | 14.79987 |
| ebi-a-GCST90002102 | finngen_R11_C3_OSTEOSARCOMA_EXALLC | Osteosarcoma (controls excluding all cancers) || id:finngen_R11_C3_OSTEOSARCOMA_EXALLC | CD45RA on resting CD4 regulatory T cell || id:ebi-a-GCST90002102 | Inverse variance weighted | 7 | 0.048244 | 0.165609 | 0.770812 | -0.27635 | 0.372837 | 1.049427 | 0.758548 | 1.451848 |
| ebi-a-GCST90002104 | finngen_R11_C3_OSTEOSARCOMA_EXALLC | Osteosarcoma (controls excluding all cancers) || id:finngen_R11_C3_OSTEOSARCOMA_EXALLC | HLA DR on myeloid Dendritic Cell || id:ebi-a-GCST90002104 | Inverse variance weighted | 6 | -0.2331 | 0.214143 | 0.276369 | -0.65282 | 0.186623 | 0.792076 | 0.520576 | 1.205173 |
| ebi-a-GCST90002105 | finngen_R11_C3_OSTEOSARCOMA_EXALLC | Osteosarcoma (controls excluding all cancers) || id:finngen_R11_C3_OSTEOSARCOMA_EXALLC | HLA DR on plasmacytoid Dendritic Cell || id:ebi-a-GCST90002105 | Inverse variance weighted | 8 | -0.24329 | 0.159615 | 0.127447 | -0.55614 | 0.069553 | 0.784042 | 0.573419 | 1.072029 |
| ebi-a-GCST90002106 | finngen_R11_C3_OSTEOSARCOMA_EXALLC | Osteosarcoma (controls excluding all cancers) || id:finngen_R11_C3_OSTEOSARCOMA_EXALLC | HLA DR on Dendritic Cell || id:ebi-a-GCST90002106 | Inverse variance weighted | 7 | -0.22799 | 0.178041 | 0.200345 | -0.57695 | 0.120966 | 0.796129 | 0.561607 | 1.128587 |
| ebi-a-GCST90002108 | finngen_R11_C3_OSTEOSARCOMA_EXALLC | Osteosarcoma (controls excluding all cancers) || id:finngen_R11_C3_OSTEOSARCOMA_EXALLC | HLA DR on CD33+ HLA DR+ CD14- || id:ebi-a-GCST90002108 | Inverse variance weighted | 3 | -0.10648 | 0.248678 | 0.668532 | -0.59388 | 0.380934 | 0.898997 | 0.552178 | 1.463651 |
| ebi-a-GCST90002109 | finngen_R11_C3_OSTEOSARCOMA_EXALLC | Osteosarcoma (controls excluding all cancers) || id:finngen_R11_C3_OSTEOSARCOMA_EXALLC | HLA DR on CD33+ HLA DR+ CD14dim || id:ebi-a-GCST90002109 | Inverse variance weighted | 3 | -0.11377 | 0.340471 | 0.738258 | -0.7811 | 0.553552 | 0.892461 | 0.457904 | 1.73942 |
| ebi-a-GCST90002110 | finngen_R11_C3_OSTEOSARCOMA_EXALLC | Osteosarcoma (controls excluding all cancers) || id:finngen_R11_C3_OSTEOSARCOMA_EXALLC | HLA DR on CD33dim HLA DR+ CD11b+ || id:ebi-a-GCST90002110 | Inverse variance weighted | 4 | 0.115936 | 0.263535 | 0.65999 | -0.40059 | 0.632466 | 1.122924 | 0.669923 | 1.882246 |
| ebi-a-GCST90002111 | finngen_R11_C3_OSTEOSARCOMA_EXALLC | Osteosarcoma (controls excluding all cancers) || id:finngen_R11_C3_OSTEOSARCOMA_EXALLC | HLA DR on CD33dim HLA DR+ CD11b- || id:ebi-a-GCST90002111 | Inverse variance weighted | 5 | 0.0883 | 0.244374 | 0.717852 | -0.39067 | 0.567274 | 1.092316 | 0.676601 | 1.763453 |
| ebi-a-GCST90002112 | finngen_R11_C3_OSTEOSARCOMA_EXALLC | Osteosarcoma (controls excluding all cancers) || id:finngen_R11_C3_OSTEOSARCOMA_EXALLC | HLA DR on CD33- HLA DR+ || id:ebi-a-GCST90002112 | Inverse variance weighted | 2 | -0.2578 | 0.222951 | 0.247556 | -0.69478 | 0.179185 | 0.77275 | 0.499182 | 1.196242 |
| ebi-a-GCST90002116 | finngen_R11_C3_OSTEOSARCOMA_EXALLC | Osteosarcoma (controls excluding all cancers) || id:finngen_R11_C3_OSTEOSARCOMA_EXALLC | HLA DR on B cell || id:ebi-a-GCST90002116 | Inverse variance weighted | 9 | 0.123937 | 0.20988 | 0.554846 | -0.28743 | 0.535301 | 1.131944 | 0.750191 | 1.707962 |
| ebi-a-GCST90002117 | finngen_R11_C3_OSTEOSARCOMA_EXALLC | Osteosarcoma (controls excluding all cancers) || id:finngen_R11_C3_OSTEOSARCOMA_EXALLC | HLA DR on HLA DR+ Natural Killer || id:ebi-a-GCST90002117 | Inverse variance weighted | 5 | -0.28866 | 0.331312 | 0.383605 | -0.93804 | 0.360709 | 0.749264 | 0.391396 | 1.434346 |
| ebi-a-GCST90002118 | finngen_R11_C3_OSTEOSARCOMA_EXALLC | Osteosarcoma (controls excluding all cancers) || id:finngen_R11_C3_OSTEOSARCOMA_EXALLC | CD8 on CD28+ CD45RA- CD8+ T cell || id:ebi-a-GCST90002118 | Inverse variance weighted | 2 | 0.158405 | 0.565369 | 0.779339 | -0.94972 | 1.266529 | 1.171641 | 0.38685 | 3.548515 |
| ebi-a-GCST90002119 | finngen_R11_C3_OSTEOSARCOMA_EXALLC | Osteosarcoma (controls excluding all cancers) || id:finngen_R11_C3_OSTEOSARCOMA_EXALLC | CD8 on CD28+ CD45RA+ CD8+ T cell || id:ebi-a-GCST90002119 | Inverse variance weighted | 8 | 0.141398 | 0.241298 | 0.557881 | -0.33155 | 0.614342 | 1.151884 | 0.717814 | 1.84844 |
| ebi-a-GCST90002120 | finngen_R11_C3_OSTEOSARCOMA_EXALLC | Osteosarcoma (controls excluding all cancers) || id:finngen_R11_C3_OSTEOSARCOMA_EXALLC | CD8 on CD28- CD8+ T cell || id:ebi-a-GCST90002120 | Inverse variance weighted | 2 | -0.08274 | 0.761497 | 0.913476 | -1.57527 | 1.409793 | 0.92059 | 0.206951 | 4.095107 |
| ebi-a-GCST90002121 | finngen_R11_C3_OSTEOSARCOMA_EXALLC | Osteosarcoma (controls excluding all cancers) || id:finngen_R11_C3_OSTEOSARCOMA_EXALLC | CD8 on CD39+ CD8+ T cell || id:ebi-a-GCST90002121 | Inverse variance weighted | 5 | -0.12012 | 0.469209 | 0.797942 | -1.03977 | 0.799526 | 0.886812 | 0.353536 | 2.224487 |

| ***TableS6. Results of a heterogeneity analysis of immune cell characteristics and osteosarcoma.*** | | | | | | | |
| --- | --- | --- | --- | --- | --- | --- | --- |
| id.exposure | id.outcome | outcome | exposure | method | Q | Q_df | Q_pval |
| ebi-a-GCST90001392 | finngen_R11_C3_OSTEOSARCOMA_EXALLC | Osteosarcoma (controls excluding all cancers) || id:finngen_R11_C3_OSTEOSARCOMA_EXALLC | IgD+ CD38+ B cell Absolute Count || id:ebi-a-GCST90001392 | Inverse variance weighted | 0.300162 | 1 | 0.583781 |
| ebi-a-GCST90001395 | finngen_R11_C3_OSTEOSARCOMA_EXALLC | Osteosarcoma (controls excluding all cancers) || id:finngen_R11_C3_OSTEOSARCOMA_EXALLC | IgD+ CD38- B cell %B cell || id:ebi-a-GCST90001395 | Inverse variance weighted | 0.78159 | 1 | 0.376655 |
| ebi-a-GCST90001398 | finngen_R11_C3_OSTEOSARCOMA_EXALLC | Osteosarcoma (controls excluding all cancers) || id:finngen_R11_C3_OSTEOSARCOMA_EXALLC | Unswitched memory B cell Absolute Count || id:ebi-a-GCST90001398 | Inverse variance weighted | 0.008951 | 1 | 0.924625 |
| ebi-a-GCST90001399 | finngen_R11_C3_OSTEOSARCOMA_EXALLC | Osteosarcoma (controls excluding all cancers) || id:finngen_R11_C3_OSTEOSARCOMA_EXALLC | IgD- CD27- B cell %B cell || id:ebi-a-GCST90001399 | MR Egger | 0.159447 | 1 | 0.689666 |
| ebi-a-GCST90001399 | finngen_R11_C3_OSTEOSARCOMA_EXALLC | Osteosarcoma (controls excluding all cancers) || id:finngen_R11_C3_OSTEOSARCOMA_EXALLC | IgD- CD27- B cell %B cell || id:ebi-a-GCST90001399 | Inverse variance weighted | 0.330788 | 2 | 0.847559 |
| ebi-a-GCST90001401 | finngen_R11_C3_OSTEOSARCOMA_EXALLC | Osteosarcoma (controls excluding all cancers) || id:finngen_R11_C3_OSTEOSARCOMA_EXALLC | IgD- CD27- B cell Absolute Count || id:ebi-a-GCST90001401 | Inverse variance weighted | 0.217424 | 1 | 0.64101 |
| ebi-a-GCST90001406 | finngen_R11_C3_OSTEOSARCOMA_EXALLC | Osteosarcoma (controls excluding all cancers) || id:finngen_R11_C3_OSTEOSARCOMA_EXALLC | Memory B cell %B cell || id:ebi-a-GCST90001406 | Inverse variance weighted | 1.415767 | 1 | 0.234101 |
| ebi-a-GCST90001417 | finngen_R11_C3_OSTEOSARCOMA_EXALLC | Osteosarcoma (controls excluding all cancers) || id:finngen_R11_C3_OSTEOSARCOMA_EXALLC | CD24+ CD27+ B cell %B cell || id:ebi-a-GCST90001417 | MR Egger | 0.744487 | 1 | 0.388227 |
| ebi-a-GCST90001417 | finngen_R11_C3_OSTEOSARCOMA_EXALLC | Osteosarcoma (controls excluding all cancers) || id:finngen_R11_C3_OSTEOSARCOMA_EXALLC | CD24+ CD27+ B cell %B cell || id:ebi-a-GCST90001417 | Inverse variance weighted | 1.778044 | 2 | 0.411058 |
| ebi-a-GCST90001424 | finngen_R11_C3_OSTEOSARCOMA_EXALLC | Osteosarcoma (controls excluding all cancers) || id:finngen_R11_C3_OSTEOSARCOMA_EXALLC | IgD+ B cell %Lymphocyte || id:ebi-a-GCST90001424 | Inverse variance weighted | 0.366321 | 1 | 0.545017 |
| ebi-a-GCST90001426 | finngen_R11_C3_OSTEOSARCOMA_EXALLC | Osteosarcoma (controls excluding all cancers) || id:finngen_R11_C3_OSTEOSARCOMA_EXALLC | IgD- CD38dim B cell %lymphocyte || id:ebi-a-GCST90001426 | Inverse variance weighted | 0.670251 | 1 | 0.412964 |
| ebi-a-GCST90001431 | finngen_R11_C3_OSTEOSARCOMA_EXALLC | Osteosarcoma (controls excluding all cancers) || id:finngen_R11_C3_OSTEOSARCOMA_EXALLC | IgD+ CD38- B cell %lymphocyte || id:ebi-a-GCST90001431 | Inverse variance weighted | 0.640142 | 1 | 0.423659 |
| ebi-a-GCST90001432 | finngen_R11_C3_OSTEOSARCOMA_EXALLC | Osteosarcoma (controls excluding all cancers) || id:finngen_R11_C3_OSTEOSARCOMA_EXALLC | Unswitched memory B cell %lymphocyte || id:ebi-a-GCST90001432 | MR Egger | 1.174038 | 2 | 0.555982 |
| ebi-a-GCST90001432 | finngen_R11_C3_OSTEOSARCOMA_EXALLC | Osteosarcoma (controls excluding all cancers) || id:finngen_R11_C3_OSTEOSARCOMA_EXALLC | Unswitched memory B cell %lymphocyte || id:ebi-a-GCST90001432 | Inverse variance weighted | 1.223271 | 3 | 0.747429 |
| ebi-a-GCST90001433 | finngen_R11_C3_OSTEOSARCOMA_EXALLC | Osteosarcoma (controls excluding all cancers) || id:finngen_R11_C3_OSTEOSARCOMA_EXALLC | IgD- CD27- B cell %lymphocyte || id:ebi-a-GCST90001433 | Inverse variance weighted | 0.169524 | 1 | 0.680535 |
| ebi-a-GCST90001434 | finngen_R11_C3_OSTEOSARCOMA_EXALLC | Osteosarcoma (controls excluding all cancers) || id:finngen_R11_C3_OSTEOSARCOMA_EXALLC | Switched memory B cell %lymphocyte || id:ebi-a-GCST90001434 | MR Egger | 2.311727 | 1 | 0.128401 |
| ebi-a-GCST90001434 | finngen_R11_C3_OSTEOSARCOMA_EXALLC | Osteosarcoma (controls excluding all cancers) || id:finngen_R11_C3_OSTEOSARCOMA_EXALLC | Switched memory B cell %lymphocyte || id:ebi-a-GCST90001434 | Inverse variance weighted | 3.461406 | 2 | 0.17716 |
| ebi-a-GCST90001436 | finngen_R11_C3_OSTEOSARCOMA_EXALLC | Osteosarcoma (controls excluding all cancers) || id:finngen_R11_C3_OSTEOSARCOMA_EXALLC | Memory B cell %lymphocyte || id:ebi-a-GCST90001436 | Inverse variance weighted | 0.938679 | 1 | 0.332618 |
| ebi-a-GCST90001439 | finngen_R11_C3_OSTEOSARCOMA_EXALLC | Osteosarcoma (controls excluding all cancers) || id:finngen_R11_C3_OSTEOSARCOMA_EXALLC | IgD+ CD24+ B cell %lymphocyte || id:ebi-a-GCST90001439 | Inverse variance weighted | 0.582748 | 1 | 0.445237 |
| ebi-a-GCST90001442 | finngen_R11_C3_OSTEOSARCOMA_EXALLC | Osteosarcoma (controls excluding all cancers) || id:finngen_R11_C3_OSTEOSARCOMA_EXALLC | CD24+ CD27+ B cell %lymphocyte || id:ebi-a-GCST90001442 | MR Egger | 0.26435 | 1 | 0.607147 |
| ebi-a-GCST90001442 | finngen_R11_C3_OSTEOSARCOMA_EXALLC | Osteosarcoma (controls excluding all cancers) || id:finngen_R11_C3_OSTEOSARCOMA_EXALLC | CD24+ CD27+ B cell %lymphocyte || id:ebi-a-GCST90001442 | Inverse variance weighted | 1.040049 | 2 | 0.594506 |
| ebi-a-GCST90001450 | finngen_R11_C3_OSTEOSARCOMA_EXALLC | Osteosarcoma (controls excluding all cancers) || id:finngen_R11_C3_OSTEOSARCOMA_EXALLC | CD62L- monocyte Absolute Count || id:ebi-a-GCST90001450 | MR Egger | 0.400392 | 1 | 0.526887 |
| ebi-a-GCST90001450 | finngen_R11_C3_OSTEOSARCOMA_EXALLC | Osteosarcoma (controls excluding all cancers) || id:finngen_R11_C3_OSTEOSARCOMA_EXALLC | CD62L- monocyte Absolute Count || id:ebi-a-GCST90001450 | Inverse variance weighted | 0.648573 | 2 | 0.723043 |
| ebi-a-GCST90001451 | finngen_R11_C3_OSTEOSARCOMA_EXALLC | Osteosarcoma (controls excluding all cancers) || id:finngen_R11_C3_OSTEOSARCOMA_EXALLC | CD62L- monocyte %monocyte || id:ebi-a-GCST90001451 | MR Egger | 2.453476 | 2 | 0.293248 |
| ebi-a-GCST90001451 | finngen_R11_C3_OSTEOSARCOMA_EXALLC | Osteosarcoma (controls excluding all cancers) || id:finngen_R11_C3_OSTEOSARCOMA_EXALLC | CD62L- monocyte %monocyte || id:ebi-a-GCST90001451 | Inverse variance weighted | 2.674618 | 3 | 0.444558 |
| ebi-a-GCST90001458 | finngen_R11_C3_OSTEOSARCOMA_EXALLC | Osteosarcoma (controls excluding all cancers) || id:finngen_R11_C3_OSTEOSARCOMA_EXALLC | Myeloid Dendritic Cell Absolute Count || id:ebi-a-GCST90001458 | MR Egger | 0.001388 | 1 | 0.970284 |
| ebi-a-GCST90001458 | finngen_R11_C3_OSTEOSARCOMA_EXALLC | Osteosarcoma (controls excluding all cancers) || id:finngen_R11_C3_OSTEOSARCOMA_EXALLC | Myeloid Dendritic Cell Absolute Count || id:ebi-a-GCST90001458 | Inverse variance weighted | 0.188067 | 2 | 0.910252 |
| ebi-a-GCST90001459 | finngen_R11_C3_OSTEOSARCOMA_EXALLC | Osteosarcoma (controls excluding all cancers) || id:finngen_R11_C3_OSTEOSARCOMA_EXALLC | Myeloid Dendritic Cell %Dendritic Cell || id:ebi-a-GCST90001459 | Inverse variance weighted | 0.15734 | 1 | 0.691617 |
| ebi-a-GCST90001460 | finngen_R11_C3_OSTEOSARCOMA_EXALLC | Osteosarcoma (controls excluding all cancers) || id:finngen_R11_C3_OSTEOSARCOMA_EXALLC | Plasmacytoid Dendritic Cell Absolute Count || id:ebi-a-GCST90001460 | Inverse variance weighted | 1.207936 | 1 | 0.271741 |
| ebi-a-GCST90001461 | finngen_R11_C3_OSTEOSARCOMA_EXALLC | Osteosarcoma (controls excluding all cancers) || id:finngen_R11_C3_OSTEOSARCOMA_EXALLC | Dendritic Cell Absolute Count || id:ebi-a-GCST90001461 | MR Egger | 0.000125 | 1 | 0.991096 |
| ebi-a-GCST90001461 | finngen_R11_C3_OSTEOSARCOMA_EXALLC | Osteosarcoma (controls excluding all cancers) || id:finngen_R11_C3_OSTEOSARCOMA_EXALLC | Dendritic Cell Absolute Count || id:ebi-a-GCST90001461 | Inverse variance weighted | 0.135734 | 2 | 0.934385 |
| ebi-a-GCST90001462 | finngen_R11_C3_OSTEOSARCOMA_EXALLC | Osteosarcoma (controls excluding all cancers) || id:finngen_R11_C3_OSTEOSARCOMA_EXALLC | CD62L- Dendritic Cell Absolute Count || id:ebi-a-GCST90001462 | MR Egger | 1.121645 | 3 | 0.771852 |
| ebi-a-GCST90001462 | finngen_R11_C3_OSTEOSARCOMA_EXALLC | Osteosarcoma (controls excluding all cancers) || id:finngen_R11_C3_OSTEOSARCOMA_EXALLC | CD62L- Dendritic Cell Absolute Count || id:ebi-a-GCST90001462 | Inverse variance weighted | 1.133744 | 4 | 0.888882 |
| ebi-a-GCST90001463 | finngen_R11_C3_OSTEOSARCOMA_EXALLC | Osteosarcoma (controls excluding all cancers) || id:finngen_R11_C3_OSTEOSARCOMA_EXALLC | CD62L- Dendritic Cell %Dendritic Cell || id:ebi-a-GCST90001463 | MR Egger | 0.517754 | 2 | 0.771918 |
| ebi-a-GCST90001463 | finngen_R11_C3_OSTEOSARCOMA_EXALLC | Osteosarcoma (controls excluding all cancers) || id:finngen_R11_C3_OSTEOSARCOMA_EXALLC | CD62L- Dendritic Cell %Dendritic Cell || id:ebi-a-GCST90001463 | Inverse variance weighted | 2.77709 | 3 | 0.427285 |
| ebi-a-GCST90001464 | finngen_R11_C3_OSTEOSARCOMA_EXALLC | Osteosarcoma (controls excluding all cancers) || id:finngen_R11_C3_OSTEOSARCOMA_EXALLC | CD86+ myeloid Dendritic Cell Absolute Count || id:ebi-a-GCST90001464 | MR Egger | 1.108892 | 3 | 0.774928 |
| ebi-a-GCST90001464 | finngen_R11_C3_OSTEOSARCOMA_EXALLC | Osteosarcoma (controls excluding all cancers) || id:finngen_R11_C3_OSTEOSARCOMA_EXALLC | CD86+ myeloid Dendritic Cell Absolute Count || id:ebi-a-GCST90001464 | Inverse variance weighted | 1.123448 | 4 | 0.890534 |
| ebi-a-GCST90001465 | finngen_R11_C3_OSTEOSARCOMA_EXALLC | Osteosarcoma (controls excluding all cancers) || id:finngen_R11_C3_OSTEOSARCOMA_EXALLC | CD86+ myeloid Dendritic Cell %Dendritic Cell || id:ebi-a-GCST90001465 | MR Egger | 0.610816 | 2 | 0.736823 |
| ebi-a-GCST90001465 | finngen_R11_C3_OSTEOSARCOMA_EXALLC | Osteosarcoma (controls excluding all cancers) || id:finngen_R11_C3_OSTEOSARCOMA_EXALLC | CD86+ myeloid Dendritic Cell %Dendritic Cell || id:ebi-a-GCST90001465 | Inverse variance weighted | 0.633731 | 3 | 0.888669 |
| ebi-a-GCST90001468 | finngen_R11_C3_OSTEOSARCOMA_EXALLC | Osteosarcoma (controls excluding all cancers) || id:finngen_R11_C3_OSTEOSARCOMA_EXALLC | CD62L- myeloid Dendritic Cell Absolute Count || id:ebi-a-GCST90001468 | MR Egger | 1.118721 | 4 | 0.891291 |
| ebi-a-GCST90001468 | finngen_R11_C3_OSTEOSARCOMA_EXALLC | Osteosarcoma (controls excluding all cancers) || id:finngen_R11_C3_OSTEOSARCOMA_EXALLC | CD62L- myeloid Dendritic Cell Absolute Count || id:ebi-a-GCST90001468 | Inverse variance weighted | 1.14 | 5 | 0.950502 |
| ebi-a-GCST90001469 | finngen_R11_C3_OSTEOSARCOMA_EXALLC | Osteosarcoma (controls excluding all cancers) || id:finngen_R11_C3_OSTEOSARCOMA_EXALLC | CD62L- myeloid Dendritic Cell %Dendritic Cell || id:ebi-a-GCST90001469 | MR Egger | 1.099031 | 4 | 0.894426 |
| ebi-a-GCST90001469 | finngen_R11_C3_OSTEOSARCOMA_EXALLC | Osteosarcoma (controls excluding all cancers) || id:finngen_R11_C3_OSTEOSARCOMA_EXALLC | CD62L- myeloid Dendritic Cell %Dendritic Cell || id:ebi-a-GCST90001469 | Inverse variance weighted | 1.127723 | 5 | 0.951621 |
| ebi-a-GCST90001471 | finngen_R11_C3_OSTEOSARCOMA_EXALLC | Osteosarcoma (controls excluding all cancers) || id:finngen_R11_C3_OSTEOSARCOMA_EXALLC | CD62L- plasmacytoid Dendritic Cell %Dendritic Cell || id:ebi-a-GCST90001471 | Inverse variance weighted | 0.122483 | 1 | 0.726357 |
| ebi-a-GCST90001472 | finngen_R11_C3_OSTEOSARCOMA_EXALLC | Osteosarcoma (controls excluding all cancers) || id:finngen_R11_C3_OSTEOSARCOMA_EXALLC | CD62L- CD86+ myeloid Dendritic Cell Absolute Count || id:ebi-a-GCST90001472 | MR Egger | 1.091296 | 3 | 0.779176 |
| ebi-a-GCST90001472 | finngen_R11_C3_OSTEOSARCOMA_EXALLC | Osteosarcoma (controls excluding all cancers) || id:finngen_R11_C3_OSTEOSARCOMA_EXALLC | CD62L- CD86+ myeloid Dendritic Cell Absolute Count || id:ebi-a-GCST90001472 | Inverse variance weighted | 1.113661 | 4 | 0.892099 |
| ebi-a-GCST90001473 | finngen_R11_C3_OSTEOSARCOMA_EXALLC | Osteosarcoma (controls excluding all cancers) || id:finngen_R11_C3_OSTEOSARCOMA_EXALLC | CD62L- CD86+ myeloid Dendritic Cell %Dendritic Cell || id:ebi-a-GCST90001473 | MR Egger | 1.058796 | 3 | 0.787029 |
| ebi-a-GCST90001473 | finngen_R11_C3_OSTEOSARCOMA_EXALLC | Osteosarcoma (controls excluding all cancers) || id:finngen_R11_C3_OSTEOSARCOMA_EXALLC | CD62L- CD86+ myeloid Dendritic Cell %Dendritic Cell || id:ebi-a-GCST90001473 | Inverse variance weighted | 1.086038 | 4 | 0.896481 |
| ebi-a-GCST90001474 | finngen_R11_C3_OSTEOSARCOMA_EXALLC | Osteosarcoma (controls excluding all cancers) || id:finngen_R11_C3_OSTEOSARCOMA_EXALLC | Plasmacytoid Dendritic Cell %Dendritic Cell || id:ebi-a-GCST90001474 | Inverse variance weighted | 0.000632 | 1 | 0.979939 |
| ebi-a-GCST90001475 | finngen_R11_C3_OSTEOSARCOMA_EXALLC | Osteosarcoma (controls excluding all cancers) || id:finngen_R11_C3_OSTEOSARCOMA_EXALLC | HLA DR++ monocyte %monocyte || id:ebi-a-GCST90001475 | MR Egger | 0.312701 | 2 | 0.855259 |
| ebi-a-GCST90001475 | finngen_R11_C3_OSTEOSARCOMA_EXALLC | Osteosarcoma (controls excluding all cancers) || id:finngen_R11_C3_OSTEOSARCOMA_EXALLC | HLA DR++ monocyte %monocyte || id:ebi-a-GCST90001475 | Inverse variance weighted | 0.35471 | 3 | 0.949431 |
| ebi-a-GCST90001476 | finngen_R11_C3_OSTEOSARCOMA_EXALLC | Osteosarcoma (controls excluding all cancers) || id:finngen_R11_C3_OSTEOSARCOMA_EXALLC | HLA DR++ monocyte %leukocyte || id:ebi-a-GCST90001476 | Inverse variance weighted | 0.001009 | 1 | 0.974665 |
| ebi-a-GCST90001478 | finngen_R11_C3_OSTEOSARCOMA_EXALLC | Osteosarcoma (controls excluding all cancers) || id:finngen_R11_C3_OSTEOSARCOMA_EXALLC | CD4 regulatory T cell %CD4+ T cell || id:ebi-a-GCST90001478 | Inverse variance weighted | 0.031328 | 1 | 0.85951 |
| ebi-a-GCST90001480 | finngen_R11_C3_OSTEOSARCOMA_EXALLC | Osteosarcoma (controls excluding all cancers) || id:finngen_R11_C3_OSTEOSARCOMA_EXALLC | Resting CD4 regulatory T cell Absolute Count || id:ebi-a-GCST90001480 | MR Egger | 4.511278 | 2 | 0.104807 |
| ebi-a-GCST90001480 | finngen_R11_C3_OSTEOSARCOMA_EXALLC | Osteosarcoma (controls excluding all cancers) || id:finngen_R11_C3_OSTEOSARCOMA_EXALLC | Resting CD4 regulatory T cell Absolute Count || id:ebi-a-GCST90001480 | Inverse variance weighted | 4.824184 | 3 | 0.185133 |
| ebi-a-GCST90001481 | finngen_R11_C3_OSTEOSARCOMA_EXALLC | Osteosarcoma (controls excluding all cancers) || id:finngen_R11_C3_OSTEOSARCOMA_EXALLC | Resting CD4 regulatory T cell %CD4 regulatory T cell || id:ebi-a-GCST90001481 | MR Egger | 13.95162 | 9 | 0.124057 |
| ebi-a-GCST90001481 | finngen_R11_C3_OSTEOSARCOMA_EXALLC | Osteosarcoma (controls excluding all cancers) || id:finngen_R11_C3_OSTEOSARCOMA_EXALLC | Resting CD4 regulatory T cell %CD4 regulatory T cell || id:ebi-a-GCST90001481 | Inverse variance weighted | 13.97009 | 10 | 0.17436 |
| ebi-a-GCST90001482 | finngen_R11_C3_OSTEOSARCOMA_EXALLC | Osteosarcoma (controls excluding all cancers) || id:finngen_R11_C3_OSTEOSARCOMA_EXALLC | Resting CD4 regulatory T cell %CD4+ T cell || id:ebi-a-GCST90001482 | MR Egger | 5.694325 | 4 | 0.223169 |
| ebi-a-GCST90001482 | finngen_R11_C3_OSTEOSARCOMA_EXALLC | Osteosarcoma (controls excluding all cancers) || id:finngen_R11_C3_OSTEOSARCOMA_EXALLC | Resting CD4 regulatory T cell %CD4+ T cell || id:ebi-a-GCST90001482 | Inverse variance weighted | 7.242969 | 5 | 0.203188 |
| ebi-a-GCST90001483 | finngen_R11_C3_OSTEOSARCOMA_EXALLC | Osteosarcoma (controls excluding all cancers) || id:finngen_R11_C3_OSTEOSARCOMA_EXALLC | CD39+ resting CD4 regulatory T cell Absolute Count || id:ebi-a-GCST90001483 | MR Egger | 3.906966 | 8 | 0.865418 |
| ebi-a-GCST90001483 | finngen_R11_C3_OSTEOSARCOMA_EXALLC | Osteosarcoma (controls excluding all cancers) || id:finngen_R11_C3_OSTEOSARCOMA_EXALLC | CD39+ resting CD4 regulatory T cell Absolute Count || id:ebi-a-GCST90001483 | Inverse variance weighted | 4.211302 | 9 | 0.896963 |
| ebi-a-GCST90001484 | finngen_R11_C3_OSTEOSARCOMA_EXALLC | Osteosarcoma (controls excluding all cancers) || id:finngen_R11_C3_OSTEOSARCOMA_EXALLC | CD39+ resting CD4 regulatory T cell %resting CD4 regulatory T cell || id:ebi-a-GCST90001484 | MR Egger | 0.905777 | 5 | 0.969802 |
| ebi-a-GCST90001484 | finngen_R11_C3_OSTEOSARCOMA_EXALLC | Osteosarcoma (controls excluding all cancers) || id:finngen_R11_C3_OSTEOSARCOMA_EXALLC | CD39+ resting CD4 regulatory T cell %resting CD4 regulatory T cell || id:ebi-a-GCST90001484 | Inverse variance weighted | 0.912124 | 6 | 0.988725 |
| ebi-a-GCST90001485 | finngen_R11_C3_OSTEOSARCOMA_EXALLC | Osteosarcoma (controls excluding all cancers) || id:finngen_R11_C3_OSTEOSARCOMA_EXALLC | CD39+ resting CD4 regulatory T cell %CD4 regulatory T cell || id:ebi-a-GCST90001485 | MR Egger | 5.50271 | 11 | 0.904404 |
| ebi-a-GCST90001485 | finngen_R11_C3_OSTEOSARCOMA_EXALLC | Osteosarcoma (controls excluding all cancers) || id:finngen_R11_C3_OSTEOSARCOMA_EXALLC | CD39+ resting CD4 regulatory T cell %CD4 regulatory T cell || id:ebi-a-GCST90001485 | Inverse variance weighted | 6.354415 | 12 | 0.897173 |
| ebi-a-GCST90001486 | finngen_R11_C3_OSTEOSARCOMA_EXALLC | Osteosarcoma (controls excluding all cancers) || id:finngen_R11_C3_OSTEOSARCOMA_EXALLC | Activated CD4 regulatory T cell Absolute Count || id:ebi-a-GCST90001486 | Inverse variance weighted | 0.24271 | 1 | 0.622256 |
| ebi-a-GCST90001487 | finngen_R11_C3_OSTEOSARCOMA_EXALLC | Osteosarcoma (controls excluding all cancers) || id:finngen_R11_C3_OSTEOSARCOMA_EXALLC | Activated CD4 regulatory T cell %CD4 regulatory T cell || id:ebi-a-GCST90001487 | MR Egger | 0.394983 | 2 | 0.820787 |
| ebi-a-GCST90001487 | finngen_R11_C3_OSTEOSARCOMA_EXALLC | Osteosarcoma (controls excluding all cancers) || id:finngen_R11_C3_OSTEOSARCOMA_EXALLC | Activated CD4 regulatory T cell %CD4 regulatory T cell || id:ebi-a-GCST90001487 | Inverse variance weighted | 4.381538 | 3 | 0.223103 |
| ebi-a-GCST90001489 | finngen_R11_C3_OSTEOSARCOMA_EXALLC | Osteosarcoma (controls excluding all cancers) || id:finngen_R11_C3_OSTEOSARCOMA_EXALLC | CD39+ activated CD4 regulatory T cell Absolute Count || id:ebi-a-GCST90001489 | MR Egger | 0.144735 | 2 | 0.930189 |
| ebi-a-GCST90001489 | finngen_R11_C3_OSTEOSARCOMA_EXALLC | Osteosarcoma (controls excluding all cancers) || id:finngen_R11_C3_OSTEOSARCOMA_EXALLC | CD39+ activated CD4 regulatory T cell Absolute Count || id:ebi-a-GCST90001489 | Inverse variance weighted | 0.286178 | 3 | 0.962607 |
| ebi-a-GCST90001491 | finngen_R11_C3_OSTEOSARCOMA_EXALLC | Osteosarcoma (controls excluding all cancers) || id:finngen_R11_C3_OSTEOSARCOMA_EXALLC | CD39+ activated CD4 regulatory T cell %CD4 regulatory T cell || id:ebi-a-GCST90001491 | MR Egger | 1.361793 | 4 | 0.850808 |
| ebi-a-GCST90001491 | finngen_R11_C3_OSTEOSARCOMA_EXALLC | Osteosarcoma (controls excluding all cancers) || id:finngen_R11_C3_OSTEOSARCOMA_EXALLC | CD39+ activated CD4 regulatory T cell %CD4 regulatory T cell || id:ebi-a-GCST90001491 | Inverse variance weighted | 1.739385 | 5 | 0.883901 |
| ebi-a-GCST90001492 | finngen_R11_C3_OSTEOSARCOMA_EXALLC | Osteosarcoma (controls excluding all cancers) || id:finngen_R11_C3_OSTEOSARCOMA_EXALLC | Secreting CD4 regulatory T cell Absolute Count || id:ebi-a-GCST90001492 | MR Egger | 0.756074 | 2 | 0.685205 |
| ebi-a-GCST90001492 | finngen_R11_C3_OSTEOSARCOMA_EXALLC | Osteosarcoma (controls excluding all cancers) || id:finngen_R11_C3_OSTEOSARCOMA_EXALLC | Secreting CD4 regulatory T cell Absolute Count || id:ebi-a-GCST90001492 | Inverse variance weighted | 2.08812 | 3 | 0.55432 |
| ebi-a-GCST90001493 | finngen_R11_C3_OSTEOSARCOMA_EXALLC | Osteosarcoma (controls excluding all cancers) || id:finngen_R11_C3_OSTEOSARCOMA_EXALLC | Secreting CD4 regulatory T cell %CD4 regulatory T cell || id:ebi-a-GCST90001493 | MR Egger | 3.115733 | 4 | 0.538648 |
| ebi-a-GCST90001493 | finngen_R11_C3_OSTEOSARCOMA_EXALLC | Osteosarcoma (controls excluding all cancers) || id:finngen_R11_C3_OSTEOSARCOMA_EXALLC | Secreting CD4 regulatory T cell %CD4 regulatory T cell || id:ebi-a-GCST90001493 | Inverse variance weighted | 3.960526 | 5 | 0.555113 |
| ebi-a-GCST90001494 | finngen_R11_C3_OSTEOSARCOMA_EXALLC | Osteosarcoma (controls excluding all cancers) || id:finngen_R11_C3_OSTEOSARCOMA_EXALLC | Secreting CD4 regulatory T cell %CD4+ T cell || id:ebi-a-GCST90001494 | MR Egger | 4.154589 | 5 | 0.52738 |
| ebi-a-GCST90001494 | finngen_R11_C3_OSTEOSARCOMA_EXALLC | Osteosarcoma (controls excluding all cancers) || id:finngen_R11_C3_OSTEOSARCOMA_EXALLC | Secreting CD4 regulatory T cell %CD4+ T cell || id:ebi-a-GCST90001494 | Inverse variance weighted | 5.746108 | 6 | 0.452224 |
| ebi-a-GCST90001495 | finngen_R11_C3_OSTEOSARCOMA_EXALLC | Osteosarcoma (controls excluding all cancers) || id:finngen_R11_C3_OSTEOSARCOMA_EXALLC | CD39+ secreting CD4 regulatory T cell Absolute Count || id:ebi-a-GCST90001495 | MR Egger | 0.458949 | 3 | 0.927813 |
| ebi-a-GCST90001495 | finngen_R11_C3_OSTEOSARCOMA_EXALLC | Osteosarcoma (controls excluding all cancers) || id:finngen_R11_C3_OSTEOSARCOMA_EXALLC | CD39+ secreting CD4 regulatory T cell Absolute Count || id:ebi-a-GCST90001495 | Inverse variance weighted | 0.548375 | 4 | 0.968624 |
| ebi-a-GCST90001496 | finngen_R11_C3_OSTEOSARCOMA_EXALLC | Osteosarcoma (controls excluding all cancers) || id:finngen_R11_C3_OSTEOSARCOMA_EXALLC | CD39+ secreting CD4 regulatory T cell %secreting CD4 regulatory T cell || id:ebi-a-GCST90001496 | MR Egger | 4.6729 | 5 | 0.457088 |
| ebi-a-GCST90001496 | finngen_R11_C3_OSTEOSARCOMA_EXALLC | Osteosarcoma (controls excluding all cancers) || id:finngen_R11_C3_OSTEOSARCOMA_EXALLC | CD39+ secreting CD4 regulatory T cell %secreting CD4 regulatory T cell || id:ebi-a-GCST90001496 | Inverse variance weighted | 4.786168 | 6 | 0.571517 |
| ebi-a-GCST90001497 | finngen_R11_C3_OSTEOSARCOMA_EXALLC | Osteosarcoma (controls excluding all cancers) || id:finngen_R11_C3_OSTEOSARCOMA_EXALLC | CD39+ secreting CD4 regulatory T cell %CD4 regulatory T cell || id:ebi-a-GCST90001497 | MR Egger | 1.494458 | 5 | 0.913708 |
| ebi-a-GCST90001497 | finngen_R11_C3_OSTEOSARCOMA_EXALLC | Osteosarcoma (controls excluding all cancers) || id:finngen_R11_C3_OSTEOSARCOMA_EXALLC | CD39+ secreting CD4 regulatory T cell %CD4 regulatory T cell || id:ebi-a-GCST90001497 | Inverse variance weighted | 1.902388 | 6 | 0.928453 |
| ebi-a-GCST90001499 | finngen_R11_C3_OSTEOSARCOMA_EXALLC | Osteosarcoma (controls excluding all cancers) || id:finngen_R11_C3_OSTEOSARCOMA_EXALLC | Activated & resting CD4 regulatory T cell %CD4 regulatory T cell || id:ebi-a-GCST90001499 | MR Egger | 3.121048 | 4 | 0.537777 |
| ebi-a-GCST90001499 | finngen_R11_C3_OSTEOSARCOMA_EXALLC | Osteosarcoma (controls excluding all cancers) || id:finngen_R11_C3_OSTEOSARCOMA_EXALLC | Activated & resting CD4 regulatory T cell %CD4 regulatory T cell || id:ebi-a-GCST90001499 | Inverse variance weighted | 3.952865 | 5 | 0.556222 |
| ebi-a-GCST90001500 | finngen_R11_C3_OSTEOSARCOMA_EXALLC | Osteosarcoma (controls excluding all cancers) || id:finngen_R11_C3_OSTEOSARCOMA_EXALLC | Activated & resting CD4 regulatory T cell %CD4+ T cell || id:ebi-a-GCST90001500 | MR Egger | 0.797349 | 1 | 0.371887 |
| ebi-a-GCST90001500 | finngen_R11_C3_OSTEOSARCOMA_EXALLC | Osteosarcoma (controls excluding all cancers) || id:finngen_R11_C3_OSTEOSARCOMA_EXALLC | Activated & resting CD4 regulatory T cell %CD4+ T cell || id:ebi-a-GCST90001500 | Inverse variance weighted | 3.073377 | 2 | 0.215092 |
| ebi-a-GCST90001501 | finngen_R11_C3_OSTEOSARCOMA_EXALLC | Osteosarcoma (controls excluding all cancers) || id:finngen_R11_C3_OSTEOSARCOMA_EXALLC | Activated & secreting CD4 regulatory T cell Absolute Count || id:ebi-a-GCST90001501 | MR Egger | 0.887531 | 2 | 0.641616 |
| ebi-a-GCST90001501 | finngen_R11_C3_OSTEOSARCOMA_EXALLC | Osteosarcoma (controls excluding all cancers) || id:finngen_R11_C3_OSTEOSARCOMA_EXALLC | Activated & secreting CD4 regulatory T cell Absolute Count || id:ebi-a-GCST90001501 | Inverse variance weighted | 2.103912 | 3 | 0.551122 |
| ebi-a-GCST90001502 | finngen_R11_C3_OSTEOSARCOMA_EXALLC | Osteosarcoma (controls excluding all cancers) || id:finngen_R11_C3_OSTEOSARCOMA_EXALLC | Activated & secreting CD4 regulatory T cell %CD4 regulatory T cell || id:ebi-a-GCST90001502 | MR Egger | 7.120005 | 7 | 0.416493 |
| ebi-a-GCST90001502 | finngen_R11_C3_OSTEOSARCOMA_EXALLC | Osteosarcoma (controls excluding all cancers) || id:finngen_R11_C3_OSTEOSARCOMA_EXALLC | Activated & secreting CD4 regulatory T cell %CD4 regulatory T cell || id:ebi-a-GCST90001502 | Inverse variance weighted | 7.288049 | 8 | 0.505897 |
| ebi-a-GCST90001503 | finngen_R11_C3_OSTEOSARCOMA_EXALLC | Osteosarcoma (controls excluding all cancers) || id:finngen_R11_C3_OSTEOSARCOMA_EXALLC | Activated & secreting CD4 regulatory T cell %CD4+ T cell || id:ebi-a-GCST90001503 | MR Egger | 7.723385 | 7 | 0.357616 |
| ebi-a-GCST90001503 | finngen_R11_C3_OSTEOSARCOMA_EXALLC | Osteosarcoma (controls excluding all cancers) || id:finngen_R11_C3_OSTEOSARCOMA_EXALLC | Activated & secreting CD4 regulatory T cell %CD4+ T cell || id:ebi-a-GCST90001503 | Inverse variance weighted | 7.741652 | 8 | 0.459105 |
| ebi-a-GCST90001505 | finngen_R11_C3_OSTEOSARCOMA_EXALLC | Osteosarcoma (controls excluding all cancers) || id:finngen_R11_C3_OSTEOSARCOMA_EXALLC | CD25++ CD4+ T cell %CD4+ T cell || id:ebi-a-GCST90001505 | Inverse variance weighted | 0.531605 | 1 | 0.465933 |
| ebi-a-GCST90001507 | finngen_R11_C3_OSTEOSARCOMA_EXALLC | Osteosarcoma (controls excluding all cancers) || id:finngen_R11_C3_OSTEOSARCOMA_EXALLC | CD25++ CD45RA+ CD4 not regulatory T cell Absolute Count || id:ebi-a-GCST90001507 | MR Egger | 1.083653 | 1 | 0.297882 |
| ebi-a-GCST90001507 | finngen_R11_C3_OSTEOSARCOMA_EXALLC | Osteosarcoma (controls excluding all cancers) || id:finngen_R11_C3_OSTEOSARCOMA_EXALLC | CD25++ CD45RA+ CD4 not regulatory T cell Absolute Count || id:ebi-a-GCST90001507 | Inverse variance weighted | 7.864266 | 2 | 0.019602 |
| ebi-a-GCST90001508 | finngen_R11_C3_OSTEOSARCOMA_EXALLC | Osteosarcoma (controls excluding all cancers) || id:finngen_R11_C3_OSTEOSARCOMA_EXALLC | CD25++ CD45RA+ CD4 not regulatory T cell %CD4+ T cell || id:ebi-a-GCST90001508 | MR Egger | 5.454328 | 3 | 0.141396 |
| ebi-a-GCST90001508 | finngen_R11_C3_OSTEOSARCOMA_EXALLC | Osteosarcoma (controls excluding all cancers) || id:finngen_R11_C3_OSTEOSARCOMA_EXALLC | CD25++ CD45RA+ CD4 not regulatory T cell %CD4+ T cell || id:ebi-a-GCST90001508 | Inverse variance weighted | 7.997998 | 4 | 0.091652 |
| ebi-a-GCST90001509 | finngen_R11_C3_OSTEOSARCOMA_EXALLC | Osteosarcoma (controls excluding all cancers) || id:finngen_R11_C3_OSTEOSARCOMA_EXALLC | CD25++ CD45RA+ CD4 not regulatory T cell %T cell || id:ebi-a-GCST90001509 | MR Egger | 5.298736 | 3 | 0.151184 |
| ebi-a-GCST90001509 | finngen_R11_C3_OSTEOSARCOMA_EXALLC | Osteosarcoma (controls excluding all cancers) || id:finngen_R11_C3_OSTEOSARCOMA_EXALLC | CD25++ CD45RA+ CD4 not regulatory T cell %T cell || id:ebi-a-GCST90001509 | Inverse variance weighted | 7.866673 | 4 | 0.096586 |
| ebi-a-GCST90001510 | finngen_R11_C3_OSTEOSARCOMA_EXALLC | Osteosarcoma (controls excluding all cancers) || id:finngen_R11_C3_OSTEOSARCOMA_EXALLC | CD25++ CD45RA- CD4 not regulatory T cell Absolute Count || id:ebi-a-GCST90001510 | Inverse variance weighted | 1.31371 | 1 | 0.251724 |
| ebi-a-GCST90001511 | finngen_R11_C3_OSTEOSARCOMA_EXALLC | Osteosarcoma (controls excluding all cancers) || id:finngen_R11_C3_OSTEOSARCOMA_EXALLC | CD25++ CD45RA- CD4 not regulatory T cell %CD4+ T cell || id:ebi-a-GCST90001511 | MR Egger | 0.100012 | 1 | 0.751815 |
| ebi-a-GCST90001511 | finngen_R11_C3_OSTEOSARCOMA_EXALLC | Osteosarcoma (controls excluding all cancers) || id:finngen_R11_C3_OSTEOSARCOMA_EXALLC | CD25++ CD45RA- CD4 not regulatory T cell %CD4+ T cell || id:ebi-a-GCST90001511 | Inverse variance weighted | 1.172352 | 2 | 0.556451 |
| ebi-a-GCST90001512 | finngen_R11_C3_OSTEOSARCOMA_EXALLC | Osteosarcoma (controls excluding all cancers) || id:finngen_R11_C3_OSTEOSARCOMA_EXALLC | CD25++ CD45RA- CD4 not regulatory T cell %T cell || id:ebi-a-GCST90001512 | MR Egger | 0.007851 | 1 | 0.929394 |
| ebi-a-GCST90001512 | finngen_R11_C3_OSTEOSARCOMA_EXALLC | Osteosarcoma (controls excluding all cancers) || id:finngen_R11_C3_OSTEOSARCOMA_EXALLC | CD25++ CD45RA- CD4 not regulatory T cell %T cell || id:ebi-a-GCST90001512 | Inverse variance weighted | 2.237856 | 2 | 0.32663 |
| ebi-a-GCST90001514 | finngen_R11_C3_OSTEOSARCOMA_EXALLC | Osteosarcoma (controls excluding all cancers) || id:finngen_R11_C3_OSTEOSARCOMA_EXALLC | Hematopoietic Stem Cell Absolute Count || id:ebi-a-GCST90001514 | Inverse variance weighted | 0.835561 | 1 | 0.360669 |
| ebi-a-GCST90001515 | finngen_R11_C3_OSTEOSARCOMA_EXALLC | Osteosarcoma (controls excluding all cancers) || id:finngen_R11_C3_OSTEOSARCOMA_EXALLC | Immature Myeloid-Derived Suppressor Cells Absolute Count || id:ebi-a-GCST90001515 | Inverse variance weighted | 0.853576 | 1 | 0.355543 |
| ebi-a-GCST90001516 | finngen_R11_C3_OSTEOSARCOMA_EXALLC | Osteosarcoma (controls excluding all cancers) || id:finngen_R11_C3_OSTEOSARCOMA_EXALLC | Immature Myeloid-Derived Suppressor Cells %CD33dim HLA DR- CD66b- || id:ebi-a-GCST90001516 | Inverse variance weighted | 0.305507 | 1 | 0.580451 |
| ebi-a-GCST90001520 | finngen_R11_C3_OSTEOSARCOMA_EXALLC | Osteosarcoma (controls excluding all cancers) || id:finngen_R11_C3_OSTEOSARCOMA_EXALLC | CD33+ HLA DR+ CD14dim Absolute Count || id:ebi-a-GCST90001520 | Inverse variance weighted | 0.41172 | 1 | 0.521098 |
| ebi-a-GCST90001524 | finngen_R11_C3_OSTEOSARCOMA_EXALLC | Osteosarcoma (controls excluding all cancers) || id:finngen_R11_C3_OSTEOSARCOMA_EXALLC | Granulocytic Myeloid-Derived Suppressor Cells Absolute Count || id:ebi-a-GCST90001524 | Inverse variance weighted | 2.12651 | 1 | 0.14477 |
| ebi-a-GCST90001526 | finngen_R11_C3_OSTEOSARCOMA_EXALLC | Osteosarcoma (controls excluding all cancers) || id:finngen_R11_C3_OSTEOSARCOMA_EXALLC | CD33dim HLA DR+ CD11b+ %CD33dim HLA DR+ || id:ebi-a-GCST90001526 | MR Egger | 0.504054 | 1 | 0.477724 |
| ebi-a-GCST90001526 | finngen_R11_C3_OSTEOSARCOMA_EXALLC | Osteosarcoma (controls excluding all cancers) || id:finngen_R11_C3_OSTEOSARCOMA_EXALLC | CD33dim HLA DR+ CD11b+ %CD33dim HLA DR+ || id:ebi-a-GCST90001526 | Inverse variance weighted | 4.681544 | 2 | 0.096253 |
| ebi-a-GCST90001527 | finngen_R11_C3_OSTEOSARCOMA_EXALLC | Osteosarcoma (controls excluding all cancers) || id:finngen_R11_C3_OSTEOSARCOMA_EXALLC | CD33dim HLA DR+ CD11b- Absolute Count || id:ebi-a-GCST90001527 | Inverse variance weighted | 0.075993 | 1 | 0.782803 |
| ebi-a-GCST90001528 | finngen_R11_C3_OSTEOSARCOMA_EXALLC | Osteosarcoma (controls excluding all cancers) || id:finngen_R11_C3_OSTEOSARCOMA_EXALLC | CD33dim HLA DR+ CD11b- %CD33dim HLA DR+ || id:ebi-a-GCST90001528 | MR Egger | 0.527682 | 1 | 0.467583 |
| ebi-a-GCST90001528 | finngen_R11_C3_OSTEOSARCOMA_EXALLC | Osteosarcoma (controls excluding all cancers) || id:finngen_R11_C3_OSTEOSARCOMA_EXALLC | CD33dim HLA DR+ CD11b- %CD33dim HLA DR+ || id:ebi-a-GCST90001528 | Inverse variance weighted | 4.687327 | 2 | 0.095975 |
| ebi-a-GCST90001530 | finngen_R11_C3_OSTEOSARCOMA_EXALLC | Osteosarcoma (controls excluding all cancers) || id:finngen_R11_C3_OSTEOSARCOMA_EXALLC | Monocytic Myeloid-Derived Suppressor Cells Absolute Count || id:ebi-a-GCST90001530 | MR Egger | 6.244657 | 3 | 0.100295 |
| ebi-a-GCST90001530 | finngen_R11_C3_OSTEOSARCOMA_EXALLC | Osteosarcoma (controls excluding all cancers) || id:finngen_R11_C3_OSTEOSARCOMA_EXALLC | Monocytic Myeloid-Derived Suppressor Cells Absolute Count || id:ebi-a-GCST90001530 | Inverse variance weighted | 6.486921 | 4 | 0.165616 |
| ebi-a-GCST90001531 | finngen_R11_C3_OSTEOSARCOMA_EXALLC | Osteosarcoma (controls excluding all cancers) || id:finngen_R11_C3_OSTEOSARCOMA_EXALLC | CD33dim HLA DR- Absolute Count || id:ebi-a-GCST90001531 | MR Egger | 1.84469 | 1 | 0.174402 |
| ebi-a-GCST90001531 | finngen_R11_C3_OSTEOSARCOMA_EXALLC | Osteosarcoma (controls excluding all cancers) || id:finngen_R11_C3_OSTEOSARCOMA_EXALLC | CD33dim HLA DR- Absolute Count || id:ebi-a-GCST90001531 | Inverse variance weighted | 1.972936 | 2 | 0.372892 |
| ebi-a-GCST90001532 | finngen_R11_C3_OSTEOSARCOMA_EXALLC | Osteosarcoma (controls excluding all cancers) || id:finngen_R11_C3_OSTEOSARCOMA_EXALLC | Basophil Absolute Count || id:ebi-a-GCST90001532 | MR Egger | 2.028037 | 1 | 0.15442 |
| ebi-a-GCST90001532 | finngen_R11_C3_OSTEOSARCOMA_EXALLC | Osteosarcoma (controls excluding all cancers) || id:finngen_R11_C3_OSTEOSARCOMA_EXALLC | Basophil Absolute Count || id:ebi-a-GCST90001532 | Inverse variance weighted | 2.11444 | 2 | 0.34742 |
| ebi-a-GCST90001533 | finngen_R11_C3_OSTEOSARCOMA_EXALLC | Osteosarcoma (controls excluding all cancers) || id:finngen_R11_C3_OSTEOSARCOMA_EXALLC | Basophil %CD33dim HLA DR- CD66b- || id:ebi-a-GCST90001533 | MR Egger | 4.037271 | 1 | 0.044506 |
| ebi-a-GCST90001533 | finngen_R11_C3_OSTEOSARCOMA_EXALLC | Osteosarcoma (controls excluding all cancers) || id:finngen_R11_C3_OSTEOSARCOMA_EXALLC | Basophil %CD33dim HLA DR- CD66b- || id:ebi-a-GCST90001533 | Inverse variance weighted | 4.095418 | 2 | 0.12903 |
| ebi-a-GCST90001534 | finngen_R11_C3_OSTEOSARCOMA_EXALLC | Osteosarcoma (controls excluding all cancers) || id:finngen_R11_C3_OSTEOSARCOMA_EXALLC | CD45RA- CD4+ T cell Absolute Count || id:ebi-a-GCST90001534 | Inverse variance weighted | 0.115068 | 1 | 0.734446 |
| ebi-a-GCST90001535 | finngen_R11_C3_OSTEOSARCOMA_EXALLC | Osteosarcoma (controls excluding all cancers) || id:finngen_R11_C3_OSTEOSARCOMA_EXALLC | CD45RA- CD4+ T cell %CD4+ T cell || id:ebi-a-GCST90001535 | MR Egger | 0.883339 | 2 | 0.642962 |
| ebi-a-GCST90001535 | finngen_R11_C3_OSTEOSARCOMA_EXALLC | Osteosarcoma (controls excluding all cancers) || id:finngen_R11_C3_OSTEOSARCOMA_EXALLC | CD45RA- CD4+ T cell %CD4+ T cell || id:ebi-a-GCST90001535 | Inverse variance weighted | 4.694023 | 3 | 0.195623 |
| ebi-a-GCST90001536 | finngen_R11_C3_OSTEOSARCOMA_EXALLC | Osteosarcoma (controls excluding all cancers) || id:finngen_R11_C3_OSTEOSARCOMA_EXALLC | CD45RA- CD4+ T cell %T cell || id:ebi-a-GCST90001536 | Inverse variance weighted | 3.381354 | 1 | 0.065938 |
| ebi-a-GCST90001540 | finngen_R11_C3_OSTEOSARCOMA_EXALLC | Osteosarcoma (controls excluding all cancers) || id:finngen_R11_C3_OSTEOSARCOMA_EXALLC | Naive CD4+ T cell Absolute Count || id:ebi-a-GCST90001540 | Inverse variance weighted | 0.16306 | 1 | 0.686354 |
| ebi-a-GCST90001541 | finngen_R11_C3_OSTEOSARCOMA_EXALLC | Osteosarcoma (controls excluding all cancers) || id:finngen_R11_C3_OSTEOSARCOMA_EXALLC | Naive CD4+ T cell %CD4+ T cell || id:ebi-a-GCST90001541 | MR Egger | 2.358772 | 2 | 0.307467 |
| ebi-a-GCST90001541 | finngen_R11_C3_OSTEOSARCOMA_EXALLC | Osteosarcoma (controls excluding all cancers) || id:finngen_R11_C3_OSTEOSARCOMA_EXALLC | Naive CD4+ T cell %CD4+ T cell || id:ebi-a-GCST90001541 | Inverse variance weighted | 3.873106 | 3 | 0.275496 |
| ebi-a-GCST90001543 | finngen_R11_C3_OSTEOSARCOMA_EXALLC | Osteosarcoma (controls excluding all cancers) || id:finngen_R11_C3_OSTEOSARCOMA_EXALLC | Effector Memory CD4+ T cell %CD4+ T cell || id:ebi-a-GCST90001543 | MR Egger | 0.07031 | 1 | 0.790885 |
| ebi-a-GCST90001543 | finngen_R11_C3_OSTEOSARCOMA_EXALLC | Osteosarcoma (controls excluding all cancers) || id:finngen_R11_C3_OSTEOSARCOMA_EXALLC | Effector Memory CD4+ T cell %CD4+ T cell || id:ebi-a-GCST90001543 | Inverse variance weighted | 0.088644 | 2 | 0.956646 |
| ebi-a-GCST90001544 | finngen_R11_C3_OSTEOSARCOMA_EXALLC | Osteosarcoma (controls excluding all cancers) || id:finngen_R11_C3_OSTEOSARCOMA_EXALLC | Effector Memory CD4+ T cell %T cell || id:ebi-a-GCST90001544 | MR Egger | 0.838218 | 2 | 0.657633 |
| ebi-a-GCST90001544 | finngen_R11_C3_OSTEOSARCOMA_EXALLC | Osteosarcoma (controls excluding all cancers) || id:finngen_R11_C3_OSTEOSARCOMA_EXALLC | Effector Memory CD4+ T cell %T cell || id:ebi-a-GCST90001544 | Inverse variance weighted | 0.875361 | 3 | 0.831369 |
| ebi-a-GCST90001545 | finngen_R11_C3_OSTEOSARCOMA_EXALLC | Osteosarcoma (controls excluding all cancers) || id:finngen_R11_C3_OSTEOSARCOMA_EXALLC | Terminally Differentiated CD4+ T cell Absolute Count || id:ebi-a-GCST90001545 | Inverse variance weighted | 0.134838 | 1 | 0.713468 |
| ebi-a-GCST90001546 | finngen_R11_C3_OSTEOSARCOMA_EXALLC | Osteosarcoma (controls excluding all cancers) || id:finngen_R11_C3_OSTEOSARCOMA_EXALLC | Terminally Differentiated CD4+ T cell %CD4+ T cell || id:ebi-a-GCST90001546 | MR Egger | 1.210538 | 3 | 0.750478 |
| ebi-a-GCST90001546 | finngen_R11_C3_OSTEOSARCOMA_EXALLC | Osteosarcoma (controls excluding all cancers) || id:finngen_R11_C3_OSTEOSARCOMA_EXALLC | Terminally Differentiated CD4+ T cell %CD4+ T cell || id:ebi-a-GCST90001546 | Inverse variance weighted | 2.761545 | 4 | 0.598489 |
| ebi-a-GCST90001547 | finngen_R11_C3_OSTEOSARCOMA_EXALLC | Osteosarcoma (controls excluding all cancers) || id:finngen_R11_C3_OSTEOSARCOMA_EXALLC | Terminally Differentiated CD4+ T cell %T cell || id:ebi-a-GCST90001547 | MR Egger | 1.60989 | 4 | 0.807013 |
| ebi-a-GCST90001547 | finngen_R11_C3_OSTEOSARCOMA_EXALLC | Osteosarcoma (controls excluding all cancers) || id:finngen_R11_C3_OSTEOSARCOMA_EXALLC | Terminally Differentiated CD4+ T cell %T cell || id:ebi-a-GCST90001547 | Inverse variance weighted | 2.614046 | 5 | 0.75923 |
| ebi-a-GCST90001553 | finngen_R11_C3_OSTEOSARCOMA_EXALLC | Osteosarcoma (controls excluding all cancers) || id:finngen_R11_C3_OSTEOSARCOMA_EXALLC | Naive CD8+ T cell %T cell || id:ebi-a-GCST90001553 | MR Egger | 1.789361 | 1 | 0.181004 |
| ebi-a-GCST90001553 | finngen_R11_C3_OSTEOSARCOMA_EXALLC | Osteosarcoma (controls excluding all cancers) || id:finngen_R11_C3_OSTEOSARCOMA_EXALLC | Naive CD8+ T cell %T cell || id:ebi-a-GCST90001553 | Inverse variance weighted | 2.239803 | 2 | 0.326312 |
| ebi-a-GCST90001554 | finngen_R11_C3_OSTEOSARCOMA_EXALLC | Osteosarcoma (controls excluding all cancers) || id:finngen_R11_C3_OSTEOSARCOMA_EXALLC | Effector Memory CD8+ T cell Absolute Count || id:ebi-a-GCST90001554 | Inverse variance weighted | 0.425602 | 1 | 0.514155 |
| ebi-a-GCST90001555 | finngen_R11_C3_OSTEOSARCOMA_EXALLC | Osteosarcoma (controls excluding all cancers) || id:finngen_R11_C3_OSTEOSARCOMA_EXALLC | Effector Memory CD8+ T cell %CD8+ T cell || id:ebi-a-GCST90001555 | MR Egger | 1.91556 | 2 | 0.383744 |
| ebi-a-GCST90001555 | finngen_R11_C3_OSTEOSARCOMA_EXALLC | Osteosarcoma (controls excluding all cancers) || id:finngen_R11_C3_OSTEOSARCOMA_EXALLC | Effector Memory CD8+ T cell %CD8+ T cell || id:ebi-a-GCST90001555 | Inverse variance weighted | 1.964851 | 3 | 0.579734 |
| ebi-a-GCST90001556 | finngen_R11_C3_OSTEOSARCOMA_EXALLC | Osteosarcoma (controls excluding all cancers) || id:finngen_R11_C3_OSTEOSARCOMA_EXALLC | Effector Memory CD8+ T cell %T cell || id:ebi-a-GCST90001556 | Inverse variance weighted | 1.136395 | 1 | 0.286415 |
| ebi-a-GCST90001558 | finngen_R11_C3_OSTEOSARCOMA_EXALLC | Osteosarcoma (controls excluding all cancers) || id:finngen_R11_C3_OSTEOSARCOMA_EXALLC | Terminally Differentiated CD8+ T cell %CD8+ T cell || id:ebi-a-GCST90001558 | MR Egger | 1.29665 | 1 | 0.254826 |
| ebi-a-GCST90001558 | finngen_R11_C3_OSTEOSARCOMA_EXALLC | Osteosarcoma (controls excluding all cancers) || id:finngen_R11_C3_OSTEOSARCOMA_EXALLC | Terminally Differentiated CD8+ T cell %CD8+ T cell || id:ebi-a-GCST90001558 | Inverse variance weighted | 4.013132 | 2 | 0.13445 |
| ebi-a-GCST90001559 | finngen_R11_C3_OSTEOSARCOMA_EXALLC | Osteosarcoma (controls excluding all cancers) || id:finngen_R11_C3_OSTEOSARCOMA_EXALLC | Terminally Differentiated CD8+ T cell %T cell || id:ebi-a-GCST90001559 | Inverse variance weighted | 1.550408 | 1 | 0.213075 |
| ebi-a-GCST90001560 | finngen_R11_C3_OSTEOSARCOMA_EXALLC | Osteosarcoma (controls excluding all cancers) || id:finngen_R11_C3_OSTEOSARCOMA_EXALLC | CD45RA+ CD8+ T cell Absolute Count || id:ebi-a-GCST90001560 | MR Egger | 0.132797 | 1 | 0.71555 |
| ebi-a-GCST90001560 | finngen_R11_C3_OSTEOSARCOMA_EXALLC | Osteosarcoma (controls excluding all cancers) || id:finngen_R11_C3_OSTEOSARCOMA_EXALLC | CD45RA+ CD8+ T cell Absolute Count || id:ebi-a-GCST90001560 | Inverse variance weighted | 0.136847 | 2 | 0.933865 |
| ebi-a-GCST90001561 | finngen_R11_C3_OSTEOSARCOMA_EXALLC | Osteosarcoma (controls excluding all cancers) || id:finngen_R11_C3_OSTEOSARCOMA_EXALLC | CD45RA+ CD8+ T cell %CD8+ T cell || id:ebi-a-GCST90001561 | MR Egger | 2.11357 | 3 | 0.549172 |
| ebi-a-GCST90001561 | finngen_R11_C3_OSTEOSARCOMA_EXALLC | Osteosarcoma (controls excluding all cancers) || id:finngen_R11_C3_OSTEOSARCOMA_EXALLC | CD45RA+ CD8+ T cell %CD8+ T cell || id:ebi-a-GCST90001561 | Inverse variance weighted | 2.113572 | 4 | 0.714879 |
| ebi-a-GCST90001562 | finngen_R11_C3_OSTEOSARCOMA_EXALLC | Osteosarcoma (controls excluding all cancers) || id:finngen_R11_C3_OSTEOSARCOMA_EXALLC | CD45RA+ CD8+ T cell %T cell || id:ebi-a-GCST90001562 | MR Egger | 2.199031 | 1 | 0.138098 |
| ebi-a-GCST90001562 | finngen_R11_C3_OSTEOSARCOMA_EXALLC | Osteosarcoma (controls excluding all cancers) || id:finngen_R11_C3_OSTEOSARCOMA_EXALLC | CD45RA+ CD8+ T cell %T cell || id:ebi-a-GCST90001562 | Inverse variance weighted | 2.21477 | 2 | 0.330422 |
| ebi-a-GCST90001569 | finngen_R11_C3_OSTEOSARCOMA_EXALLC | Osteosarcoma (controls excluding all cancers) || id:finngen_R11_C3_OSTEOSARCOMA_EXALLC | Effector Memory CD4-CD8- T cell Absolute Count || id:ebi-a-GCST90001569 | MR Egger | 2.755927 | 2 | 0.252091 |
| ebi-a-GCST90001569 | finngen_R11_C3_OSTEOSARCOMA_EXALLC | Osteosarcoma (controls excluding all cancers) || id:finngen_R11_C3_OSTEOSARCOMA_EXALLC | Effector Memory CD4-CD8- T cell Absolute Count || id:ebi-a-GCST90001569 | Inverse variance weighted | 6.626539 | 3 | 0.084803 |
| ebi-a-GCST90001570 | finngen_R11_C3_OSTEOSARCOMA_EXALLC | Osteosarcoma (controls excluding all cancers) || id:finngen_R11_C3_OSTEOSARCOMA_EXALLC | Effector Memory CD4-CD8- T cell %CD4-CD8- T cell || id:ebi-a-GCST90001570 | MR Egger | 0.404486 | 2 | 0.816896 |
| ebi-a-GCST90001570 | finngen_R11_C3_OSTEOSARCOMA_EXALLC | Osteosarcoma (controls excluding all cancers) || id:finngen_R11_C3_OSTEOSARCOMA_EXALLC | Effector Memory CD4-CD8- T cell %CD4-CD8- T cell || id:ebi-a-GCST90001570 | Inverse variance weighted | 0.497347 | 3 | 0.919474 |
| ebi-a-GCST90001571 | finngen_R11_C3_OSTEOSARCOMA_EXALLC | Osteosarcoma (controls excluding all cancers) || id:finngen_R11_C3_OSTEOSARCOMA_EXALLC | Effector Memory CD4-CD8- T cell %T cell || id:ebi-a-GCST90001571 | MR Egger | 0.076531 | 1 | 0.782055 |
| ebi-a-GCST90001571 | finngen_R11_C3_OSTEOSARCOMA_EXALLC | Osteosarcoma (controls excluding all cancers) || id:finngen_R11_C3_OSTEOSARCOMA_EXALLC | Effector Memory CD4-CD8- T cell %T cell || id:ebi-a-GCST90001571 | Inverse variance weighted | 1.274936 | 2 | 0.528629 |
| ebi-a-GCST90001572 | finngen_R11_C3_OSTEOSARCOMA_EXALLC | Osteosarcoma (controls excluding all cancers) || id:finngen_R11_C3_OSTEOSARCOMA_EXALLC | Terminally Differentiated CD4-CD8- T cell Absolute Count || id:ebi-a-GCST90001572 | Inverse variance weighted | 0.695009 | 1 | 0.404466 |
| ebi-a-GCST90001573 | finngen_R11_C3_OSTEOSARCOMA_EXALLC | Osteosarcoma (controls excluding all cancers) || id:finngen_R11_C3_OSTEOSARCOMA_EXALLC | Terminally Differentiated CD4-CD8- T cell %CD4-CD8- T cell || id:ebi-a-GCST90001573 | Inverse variance weighted | 2.773662 | 1 | 0.095827 |
| ebi-a-GCST90001574 | finngen_R11_C3_OSTEOSARCOMA_EXALLC | Osteosarcoma (controls excluding all cancers) || id:finngen_R11_C3_OSTEOSARCOMA_EXALLC | Terminally Differentiated CD4-CD8- T cell %T cell || id:ebi-a-GCST90001574 | MR Egger | 0.095074 | 2 | 0.953575 |
| ebi-a-GCST90001574 | finngen_R11_C3_OSTEOSARCOMA_EXALLC | Osteosarcoma (controls excluding all cancers) || id:finngen_R11_C3_OSTEOSARCOMA_EXALLC | Terminally Differentiated CD4-CD8- T cell %T cell || id:ebi-a-GCST90001574 | Inverse variance weighted | 0.121479 | 3 | 0.989141 |
| ebi-a-GCST90001580 | finngen_R11_C3_OSTEOSARCOMA_EXALLC | Osteosarcoma (controls excluding all cancers) || id:finngen_R11_C3_OSTEOSARCOMA_EXALLC | CD14+ CD16+ monocyte Absolute Count || id:ebi-a-GCST90001580 | MR Egger | 0.698686 | 1 | 0.403226 |
| ebi-a-GCST90001580 | finngen_R11_C3_OSTEOSARCOMA_EXALLC | Osteosarcoma (controls excluding all cancers) || id:finngen_R11_C3_OSTEOSARCOMA_EXALLC | CD14+ CD16+ monocyte Absolute Count || id:ebi-a-GCST90001580 | Inverse variance weighted | 1.163614 | 2 | 0.558888 |
| ebi-a-GCST90001581 | finngen_R11_C3_OSTEOSARCOMA_EXALLC | Osteosarcoma (controls excluding all cancers) || id:finngen_R11_C3_OSTEOSARCOMA_EXALLC | CD14- CD16- Absolute Count || id:ebi-a-GCST90001581 | MR Egger | 0.168847 | 1 | 0.681138 |
| ebi-a-GCST90001581 | finngen_R11_C3_OSTEOSARCOMA_EXALLC | Osteosarcoma (controls excluding all cancers) || id:finngen_R11_C3_OSTEOSARCOMA_EXALLC | CD14- CD16- Absolute Count || id:ebi-a-GCST90001581 | Inverse variance weighted | 0.437603 | 2 | 0.803481 |
| ebi-a-GCST90001582 | finngen_R11_C3_OSTEOSARCOMA_EXALLC | Osteosarcoma (controls excluding all cancers) || id:finngen_R11_C3_OSTEOSARCOMA_EXALLC | CD14+ CD16- monocyte Absolute Count || id:ebi-a-GCST90001582 | MR Egger | 0.221029 | 1 | 0.638257 |
| ebi-a-GCST90001582 | finngen_R11_C3_OSTEOSARCOMA_EXALLC | Osteosarcoma (controls excluding all cancers) || id:finngen_R11_C3_OSTEOSARCOMA_EXALLC | CD14+ CD16- monocyte Absolute Count || id:ebi-a-GCST90001582 | Inverse variance weighted | 0.384452 | 2 | 0.82512 |
| ebi-a-GCST90001584 | finngen_R11_C3_OSTEOSARCOMA_EXALLC | Osteosarcoma (controls excluding all cancers) || id:finngen_R11_C3_OSTEOSARCOMA_EXALLC | CD14- CD16+ monocyte %monocyte || id:ebi-a-GCST90001584 | Inverse variance weighted | 2.228182 | 1 | 0.135513 |
| ebi-a-GCST90001585 | finngen_R11_C3_OSTEOSARCOMA_EXALLC | Osteosarcoma (controls excluding all cancers) || id:finngen_R11_C3_OSTEOSARCOMA_EXALLC | CD14+ CD16+ monocyte %monocyte || id:ebi-a-GCST90001585 | MR Egger | 0.755465 | 1 | 0.384752 |
| ebi-a-GCST90001585 | finngen_R11_C3_OSTEOSARCOMA_EXALLC | Osteosarcoma (controls excluding all cancers) || id:finngen_R11_C3_OSTEOSARCOMA_EXALLC | CD14+ CD16+ monocyte %monocyte || id:ebi-a-GCST90001585 | Inverse variance weighted | 1.165539 | 2 | 0.55835 |
| ebi-a-GCST90001586 | finngen_R11_C3_OSTEOSARCOMA_EXALLC | Osteosarcoma (controls excluding all cancers) || id:finngen_R11_C3_OSTEOSARCOMA_EXALLC | CD14+ CD16- monocyte %monocyte || id:ebi-a-GCST90001586 | Inverse variance weighted | 1.771934 | 1 | 0.183143 |
| ebi-a-GCST90001587 | finngen_R11_C3_OSTEOSARCOMA_EXALLC | Osteosarcoma (controls excluding all cancers) || id:finngen_R11_C3_OSTEOSARCOMA_EXALLC | CD16+ monocyte %monocyte || id:ebi-a-GCST90001587 | Inverse variance weighted | 1.775556 | 1 | 0.182696 |
| ebi-a-GCST90001588 | finngen_R11_C3_OSTEOSARCOMA_EXALLC | Osteosarcoma (controls excluding all cancers) || id:finngen_R11_C3_OSTEOSARCOMA_EXALLC | T/B cell || id:ebi-a-GCST90001588 | Inverse variance weighted | 1.024196 | 1 | 0.311526 |
| ebi-a-GCST90001594 | finngen_R11_C3_OSTEOSARCOMA_EXALLC | Osteosarcoma (controls excluding all cancers) || id:finngen_R11_C3_OSTEOSARCOMA_EXALLC | CD4+CD8+ T cell Absolute Count || id:ebi-a-GCST90001594 | Inverse variance weighted | 0.902098 | 1 | 0.34222 |
| ebi-a-GCST90001596 | finngen_R11_C3_OSTEOSARCOMA_EXALLC | Osteosarcoma (controls excluding all cancers) || id:finngen_R11_C3_OSTEOSARCOMA_EXALLC | CD8dim T cell Absolute Count || id:ebi-a-GCST90001596 | MR Egger | 1.16393 | 1 | 0.280652 |
| ebi-a-GCST90001596 | finngen_R11_C3_OSTEOSARCOMA_EXALLC | Osteosarcoma (controls excluding all cancers) || id:finngen_R11_C3_OSTEOSARCOMA_EXALLC | CD8dim T cell Absolute Count || id:ebi-a-GCST90001596 | Inverse variance weighted | 3.225595 | 2 | 0.199329 |
| ebi-a-GCST90001597 | finngen_R11_C3_OSTEOSARCOMA_EXALLC | Osteosarcoma (controls excluding all cancers) || id:finngen_R11_C3_OSTEOSARCOMA_EXALLC | CD8dim T cell %T cell || id:ebi-a-GCST90001597 | Inverse variance weighted | 1.267211 | 1 | 0.260291 |
| ebi-a-GCST90001598 | finngen_R11_C3_OSTEOSARCOMA_EXALLC | Osteosarcoma (controls excluding all cancers) || id:finngen_R11_C3_OSTEOSARCOMA_EXALLC | CD4-CD8- T cell Absolute Count || id:ebi-a-GCST90001598 | Inverse variance weighted | 2.789181 | 1 | 0.094903 |
| ebi-a-GCST90001599 | finngen_R11_C3_OSTEOSARCOMA_EXALLC | Osteosarcoma (controls excluding all cancers) || id:finngen_R11_C3_OSTEOSARCOMA_EXALLC | CD4-CD8- T cell %T cell || id:ebi-a-GCST90001599 | MR Egger | 0.94213 | 1 | 0.331731 |
| ebi-a-GCST90001599 | finngen_R11_C3_OSTEOSARCOMA_EXALLC | Osteosarcoma (controls excluding all cancers) || id:finngen_R11_C3_OSTEOSARCOMA_EXALLC | CD4-CD8- T cell %T cell || id:ebi-a-GCST90001599 | Inverse variance weighted | 1.678431 | 2 | 0.432049 |
| ebi-a-GCST90001601 | finngen_R11_C3_OSTEOSARCOMA_EXALLC | Osteosarcoma (controls excluding all cancers) || id:finngen_R11_C3_OSTEOSARCOMA_EXALLC | Lymphocyte Absolute Count || id:ebi-a-GCST90001601 | Inverse variance weighted | 0.439142 | 1 | 0.507537 |
| ebi-a-GCST90001603 | finngen_R11_C3_OSTEOSARCOMA_EXALLC | Osteosarcoma (controls excluding all cancers) || id:finngen_R11_C3_OSTEOSARCOMA_EXALLC | T cell Absolute Count || id:ebi-a-GCST90001603 | Inverse variance weighted | 0.354159 | 1 | 0.551768 |
| ebi-a-GCST90001604 | finngen_R11_C3_OSTEOSARCOMA_EXALLC | Osteosarcoma (controls excluding all cancers) || id:finngen_R11_C3_OSTEOSARCOMA_EXALLC | T cell %lymphocyte || id:ebi-a-GCST90001604 | Inverse variance weighted | 0.824445 | 1 | 0.363884 |
| ebi-a-GCST90001609 | finngen_R11_C3_OSTEOSARCOMA_EXALLC | Osteosarcoma (controls excluding all cancers) || id:finngen_R11_C3_OSTEOSARCOMA_EXALLC | CD4+ CD8dim T cell Absolute Count || id:ebi-a-GCST90001609 | Inverse variance weighted | 0.18246 | 1 | 0.669268 |
| ebi-a-GCST90001610 | finngen_R11_C3_OSTEOSARCOMA_EXALLC | Osteosarcoma (controls excluding all cancers) || id:finngen_R11_C3_OSTEOSARCOMA_EXALLC | CD4+ CD8dim T cell %lymphocyte || id:ebi-a-GCST90001610 | MR Egger | 0.088026 | 1 | 0.766701 |
| ebi-a-GCST90001610 | finngen_R11_C3_OSTEOSARCOMA_EXALLC | Osteosarcoma (controls excluding all cancers) || id:finngen_R11_C3_OSTEOSARCOMA_EXALLC | CD4+ CD8dim T cell %lymphocyte || id:ebi-a-GCST90001610 | Inverse variance weighted | 0.145109 | 2 | 0.930015 |
| ebi-a-GCST90001611 | finngen_R11_C3_OSTEOSARCOMA_EXALLC | Osteosarcoma (controls excluding all cancers) || id:finngen_R11_C3_OSTEOSARCOMA_EXALLC | CD4+ CD8dim T cell %leukocyte || id:ebi-a-GCST90001611 | Inverse variance weighted | 0.157463 | 1 | 0.691503 |
| ebi-a-GCST90001612 | finngen_R11_C3_OSTEOSARCOMA_EXALLC | Osteosarcoma (controls excluding all cancers) || id:finngen_R11_C3_OSTEOSARCOMA_EXALLC | CD8dim T cell %leukocyte || id:ebi-a-GCST90001612 | Inverse variance weighted | 1.288871 | 1 | 0.256256 |
| ebi-a-GCST90001613 | finngen_R11_C3_OSTEOSARCOMA_EXALLC | Osteosarcoma (controls excluding all cancers) || id:finngen_R11_C3_OSTEOSARCOMA_EXALLC | CD4-CD8- T cell %leukocyte || id:ebi-a-GCST90001613 | MR Egger | 1.107816 | 2 | 0.574699 |
| ebi-a-GCST90001613 | finngen_R11_C3_OSTEOSARCOMA_EXALLC | Osteosarcoma (controls excluding all cancers) || id:finngen_R11_C3_OSTEOSARCOMA_EXALLC | CD4-CD8- T cell %leukocyte || id:ebi-a-GCST90001613 | Inverse variance weighted | 6.357194 | 3 | 0.095468 |
| ebi-a-GCST90001614 | finngen_R11_C3_OSTEOSARCOMA_EXALLC | Osteosarcoma (controls excluding all cancers) || id:finngen_R11_C3_OSTEOSARCOMA_EXALLC | CD8+ and CD8dim T cell %leukocyte || id:ebi-a-GCST90001614 | Inverse variance weighted | 0.206375 | 1 | 0.649624 |
| ebi-a-GCST90001618 | finngen_R11_C3_OSTEOSARCOMA_EXALLC | Osteosarcoma (controls excluding all cancers) || id:finngen_R11_C3_OSTEOSARCOMA_EXALLC | HLA DR+ T cell Absolute Count || id:ebi-a-GCST90001618 | MR Egger | 0.82393 | 1 | 0.364034 |
| ebi-a-GCST90001618 | finngen_R11_C3_OSTEOSARCOMA_EXALLC | Osteosarcoma (controls excluding all cancers) || id:finngen_R11_C3_OSTEOSARCOMA_EXALLC | HLA DR+ T cell Absolute Count || id:ebi-a-GCST90001618 | Inverse variance weighted | 1.892365 | 2 | 0.38822 |
| ebi-a-GCST90001619 | finngen_R11_C3_OSTEOSARCOMA_EXALLC | Osteosarcoma (controls excluding all cancers) || id:finngen_R11_C3_OSTEOSARCOMA_EXALLC | HLA DR+ T cell%T cell || id:ebi-a-GCST90001619 | MR Egger | 0.288164 | 2 | 0.865817 |
| ebi-a-GCST90001619 | finngen_R11_C3_OSTEOSARCOMA_EXALLC | Osteosarcoma (controls excluding all cancers) || id:finngen_R11_C3_OSTEOSARCOMA_EXALLC | HLA DR+ T cell%T cell || id:ebi-a-GCST90001619 | Inverse variance weighted | 1.93692 | 3 | 0.585602 |
| ebi-a-GCST90001620 | finngen_R11_C3_OSTEOSARCOMA_EXALLC | Osteosarcoma (controls excluding all cancers) || id:finngen_R11_C3_OSTEOSARCOMA_EXALLC | HLA DR+ T cell%lymphocyte || id:ebi-a-GCST90001620 | MR Egger | 2.926248 | 2 | 0.231512 |
| ebi-a-GCST90001620 | finngen_R11_C3_OSTEOSARCOMA_EXALLC | Osteosarcoma (controls excluding all cancers) || id:finngen_R11_C3_OSTEOSARCOMA_EXALLC | HLA DR+ T cell%lymphocyte || id:ebi-a-GCST90001620 | Inverse variance weighted | 3.908194 | 3 | 0.27155 |
| ebi-a-GCST90001621 | finngen_R11_C3_OSTEOSARCOMA_EXALLC | Osteosarcoma (controls excluding all cancers) || id:finngen_R11_C3_OSTEOSARCOMA_EXALLC | Natural Killer T Absolute Count || id:ebi-a-GCST90001621 | MR Egger | 1.639671 | 3 | 0.650428 |
| ebi-a-GCST90001621 | finngen_R11_C3_OSTEOSARCOMA_EXALLC | Osteosarcoma (controls excluding all cancers) || id:finngen_R11_C3_OSTEOSARCOMA_EXALLC | Natural Killer T Absolute Count || id:ebi-a-GCST90001621 | Inverse variance weighted | 5.722117 | 4 | 0.220884 |
| ebi-a-GCST90001622 | finngen_R11_C3_OSTEOSARCOMA_EXALLC | Osteosarcoma (controls excluding all cancers) || id:finngen_R11_C3_OSTEOSARCOMA_EXALLC | Natural Killer T %T cell || id:ebi-a-GCST90001622 | MR Egger | 2.151703 | 3 | 0.541524 |
| ebi-a-GCST90001622 | finngen_R11_C3_OSTEOSARCOMA_EXALLC | Osteosarcoma (controls excluding all cancers) || id:finngen_R11_C3_OSTEOSARCOMA_EXALLC | Natural Killer T %T cell || id:ebi-a-GCST90001622 | Inverse variance weighted | 4.494643 | 4 | 0.343183 |
| ebi-a-GCST90001623 | finngen_R11_C3_OSTEOSARCOMA_EXALLC | Osteosarcoma (controls excluding all cancers) || id:finngen_R11_C3_OSTEOSARCOMA_EXALLC | Natural Killer T %lymphocyte || id:ebi-a-GCST90001623 | MR Egger | 2.916833 | 5 | 0.712806 |
| ebi-a-GCST90001623 | finngen_R11_C3_OSTEOSARCOMA_EXALLC | Osteosarcoma (controls excluding all cancers) || id:finngen_R11_C3_OSTEOSARCOMA_EXALLC | Natural Killer T %lymphocyte || id:ebi-a-GCST90001623 | Inverse variance weighted | 4.996133 | 6 | 0.544309 |
| ebi-a-GCST90001624 | finngen_R11_C3_OSTEOSARCOMA_EXALLC | Osteosarcoma (controls excluding all cancers) || id:finngen_R11_C3_OSTEOSARCOMA_EXALLC | HLA DR+ CD4+ T cell Absolute Count || id:ebi-a-GCST90001624 | Inverse variance weighted | 1.427627 | 1 | 0.232152 |
| ebi-a-GCST90001626 | finngen_R11_C3_OSTEOSARCOMA_EXALLC | Osteosarcoma (controls excluding all cancers) || id:finngen_R11_C3_OSTEOSARCOMA_EXALLC | HLA DR+ CD4+ T cell %lymphocyte || id:ebi-a-GCST90001626 | Inverse variance weighted | 1.219679 | 1 | 0.269424 |
| ebi-a-GCST90001627 | finngen_R11_C3_OSTEOSARCOMA_EXALLC | Osteosarcoma (controls excluding all cancers) || id:finngen_R11_C3_OSTEOSARCOMA_EXALLC | HLA DR+ CD8+ T cell Absolute Count || id:ebi-a-GCST90001627 | MR Egger | 0.723339 | 1 | 0.395051 |
| ebi-a-GCST90001627 | finngen_R11_C3_OSTEOSARCOMA_EXALLC | Osteosarcoma (controls excluding all cancers) || id:finngen_R11_C3_OSTEOSARCOMA_EXALLC | HLA DR+ CD8+ T cell Absolute Count || id:ebi-a-GCST90001627 | Inverse variance weighted | 1.90945 | 2 | 0.384918 |
| ebi-a-GCST90001628 | finngen_R11_C3_OSTEOSARCOMA_EXALLC | Osteosarcoma (controls excluding all cancers) || id:finngen_R11_C3_OSTEOSARCOMA_EXALLC | HLA DR+ CD8+ T cell %T cell || id:ebi-a-GCST90001628 | MR Egger | 0.035804 | 1 | 0.84992 |
| ebi-a-GCST90001628 | finngen_R11_C3_OSTEOSARCOMA_EXALLC | Osteosarcoma (controls excluding all cancers) || id:finngen_R11_C3_OSTEOSARCOMA_EXALLC | HLA DR+ CD8+ T cell %T cell || id:ebi-a-GCST90001628 | Inverse variance weighted | 0.369792 | 2 | 0.831191 |
| ebi-a-GCST90001629 | finngen_R11_C3_OSTEOSARCOMA_EXALLC | Osteosarcoma (controls excluding all cancers) || id:finngen_R11_C3_OSTEOSARCOMA_EXALLC | HLA DR+ CD8+ T cell %lymphocyte || id:ebi-a-GCST90001629 | Inverse variance weighted | 0.158566 | 1 | 0.69048 |
| ebi-a-GCST90001630 | finngen_R11_C3_OSTEOSARCOMA_EXALLC | Osteosarcoma (controls excluding all cancers) || id:finngen_R11_C3_OSTEOSARCOMA_EXALLC | CD8+ Natural Killer T Absolute Count || id:ebi-a-GCST90001630 | Inverse variance weighted | 0.231552 | 1 | 0.630376 |
| ebi-a-GCST90001633 | finngen_R11_C3_OSTEOSARCOMA_EXALLC | Osteosarcoma (controls excluding all cancers) || id:finngen_R11_C3_OSTEOSARCOMA_EXALLC | CD8dim Natural Killer T Absolute Count || id:ebi-a-GCST90001633 | MR Egger | 2.935706 | 3 | 0.401645 |
| ebi-a-GCST90001633 | finngen_R11_C3_OSTEOSARCOMA_EXALLC | Osteosarcoma (controls excluding all cancers) || id:finngen_R11_C3_OSTEOSARCOMA_EXALLC | CD8dim Natural Killer T Absolute Count || id:ebi-a-GCST90001633 | Inverse variance weighted | 3.125494 | 4 | 0.537048 |
| ebi-a-GCST90001634 | finngen_R11_C3_OSTEOSARCOMA_EXALLC | Osteosarcoma (controls excluding all cancers) || id:finngen_R11_C3_OSTEOSARCOMA_EXALLC | CD8dim Natural Killer T %T cell || id:ebi-a-GCST90001634 | MR Egger | 2.683695 | 3 | 0.443005 |
| ebi-a-GCST90001634 | finngen_R11_C3_OSTEOSARCOMA_EXALLC | Osteosarcoma (controls excluding all cancers) || id:finngen_R11_C3_OSTEOSARCOMA_EXALLC | CD8dim Natural Killer T %T cell || id:ebi-a-GCST90001634 | Inverse variance weighted | 3.32102 | 4 | 0.505609 |
| ebi-a-GCST90001635 | finngen_R11_C3_OSTEOSARCOMA_EXALLC | Osteosarcoma (controls excluding all cancers) || id:finngen_R11_C3_OSTEOSARCOMA_EXALLC | CD8dim Natural Killer T %lymphocyte || id:ebi-a-GCST90001635 | MR Egger | 2.98054 | 4 | 0.561087 |
| ebi-a-GCST90001635 | finngen_R11_C3_OSTEOSARCOMA_EXALLC | Osteosarcoma (controls excluding all cancers) || id:finngen_R11_C3_OSTEOSARCOMA_EXALLC | CD8dim Natural Killer T %lymphocyte || id:ebi-a-GCST90001635 | Inverse variance weighted | 3.339314 | 5 | 0.647828 |
| ebi-a-GCST90001637 | finngen_R11_C3_OSTEOSARCOMA_EXALLC | Osteosarcoma (controls excluding all cancers) || id:finngen_R11_C3_OSTEOSARCOMA_EXALLC | CD4-CD8- Natural Killer T %T cell || id:ebi-a-GCST90001637 | MR Egger | 2.231847 | 3 | 0.525703 |
| ebi-a-GCST90001637 | finngen_R11_C3_OSTEOSARCOMA_EXALLC | Osteosarcoma (controls excluding all cancers) || id:finngen_R11_C3_OSTEOSARCOMA_EXALLC | CD4-CD8- Natural Killer T %T cell || id:ebi-a-GCST90001637 | Inverse variance weighted | 3.4978 | 4 | 0.478213 |
| ebi-a-GCST90001638 | finngen_R11_C3_OSTEOSARCOMA_EXALLC | Osteosarcoma (controls excluding all cancers) || id:finngen_R11_C3_OSTEOSARCOMA_EXALLC | CD4-CD8- Natural Killer T %lymphocyte || id:ebi-a-GCST90001638 | MR Egger | 2.282104 | 4 | 0.684029 |
| ebi-a-GCST90001638 | finngen_R11_C3_OSTEOSARCOMA_EXALLC | Osteosarcoma (controls excluding all cancers) || id:finngen_R11_C3_OSTEOSARCOMA_EXALLC | CD4-CD8- Natural Killer T %lymphocyte || id:ebi-a-GCST90001638 | Inverse variance weighted | 5.591966 | 5 | 0.347967 |
| ebi-a-GCST90001643 | finngen_R11_C3_OSTEOSARCOMA_EXALLC | Osteosarcoma (controls excluding all cancers) || id:finngen_R11_C3_OSTEOSARCOMA_EXALLC | B cell %CD3- lymphocyte || id:ebi-a-GCST90001643 | MR Egger | 0.709997 | 1 | 0.399445 |
| ebi-a-GCST90001643 | finngen_R11_C3_OSTEOSARCOMA_EXALLC | Osteosarcoma (controls excluding all cancers) || id:finngen_R11_C3_OSTEOSARCOMA_EXALLC | B cell %CD3- lymphocyte || id:ebi-a-GCST90001643 | Inverse variance weighted | 1.668342 | 2 | 0.434234 |
| ebi-a-GCST90001644 | finngen_R11_C3_OSTEOSARCOMA_EXALLC | Osteosarcoma (controls excluding all cancers) || id:finngen_R11_C3_OSTEOSARCOMA_EXALLC | B cell %lymphocyte || id:ebi-a-GCST90001644 | Inverse variance weighted | 0.589522 | 1 | 0.442604 |
| ebi-a-GCST90001645 | finngen_R11_C3_OSTEOSARCOMA_EXALLC | Osteosarcoma (controls excluding all cancers) || id:finngen_R11_C3_OSTEOSARCOMA_EXALLC | Natural Killer Absolute Count || id:ebi-a-GCST90001645 | MR Egger | 0.385933 | 1 | 0.534445 |
| ebi-a-GCST90001645 | finngen_R11_C3_OSTEOSARCOMA_EXALLC | Osteosarcoma (controls excluding all cancers) || id:finngen_R11_C3_OSTEOSARCOMA_EXALLC | Natural Killer Absolute Count || id:ebi-a-GCST90001645 | Inverse variance weighted | 4.083804 | 2 | 0.129782 |
| ebi-a-GCST90001646 | finngen_R11_C3_OSTEOSARCOMA_EXALLC | Osteosarcoma (controls excluding all cancers) || id:finngen_R11_C3_OSTEOSARCOMA_EXALLC | Natural Killer %CD3- lymphocyte || id:ebi-a-GCST90001646 | MR Egger | 4.873825 | 3 | 0.181273 |
| ebi-a-GCST90001646 | finngen_R11_C3_OSTEOSARCOMA_EXALLC | Osteosarcoma (controls excluding all cancers) || id:finngen_R11_C3_OSTEOSARCOMA_EXALLC | Natural Killer %CD3- lymphocyte || id:ebi-a-GCST90001646 | Inverse variance weighted | 5.866565 | 4 | 0.209337 |
| ebi-a-GCST90001647 | finngen_R11_C3_OSTEOSARCOMA_EXALLC | Osteosarcoma (controls excluding all cancers) || id:finngen_R11_C3_OSTEOSARCOMA_EXALLC | Natural Killer %lymphocyte || id:ebi-a-GCST90001647 | MR Egger | 0.041854 | 1 | 0.837898 |
| ebi-a-GCST90001647 | finngen_R11_C3_OSTEOSARCOMA_EXALLC | Osteosarcoma (controls excluding all cancers) || id:finngen_R11_C3_OSTEOSARCOMA_EXALLC | Natural Killer %lymphocyte || id:ebi-a-GCST90001647 | Inverse variance weighted | 4.375546 | 2 | 0.112166 |
| ebi-a-GCST90001648 | finngen_R11_C3_OSTEOSARCOMA_EXALLC | Osteosarcoma (controls excluding all cancers) || id:finngen_R11_C3_OSTEOSARCOMA_EXALLC | HLA DR+ Natural Killer Absolute Count || id:ebi-a-GCST90001648 | MR Egger | 1.364524 | 2 | 0.505472 |
| ebi-a-GCST90001648 | finngen_R11_C3_OSTEOSARCOMA_EXALLC | Osteosarcoma (controls excluding all cancers) || id:finngen_R11_C3_OSTEOSARCOMA_EXALLC | HLA DR+ Natural Killer Absolute Count || id:ebi-a-GCST90001648 | Inverse variance weighted | 2.53649 | 3 | 0.468733 |
| ebi-a-GCST90001649 | finngen_R11_C3_OSTEOSARCOMA_EXALLC | Osteosarcoma (controls excluding all cancers) || id:finngen_R11_C3_OSTEOSARCOMA_EXALLC | HLA DR+ Natural Killer %Natural Killer || id:ebi-a-GCST90001649 | MR Egger | 2.030133 | 4 | 0.730216 |
| ebi-a-GCST90001649 | finngen_R11_C3_OSTEOSARCOMA_EXALLC | Osteosarcoma (controls excluding all cancers) || id:finngen_R11_C3_OSTEOSARCOMA_EXALLC | HLA DR+ Natural Killer %Natural Killer || id:ebi-a-GCST90001649 | Inverse variance weighted | 2.266317 | 5 | 0.811201 |
| ebi-a-GCST90001650 | finngen_R11_C3_OSTEOSARCOMA_EXALLC | Osteosarcoma (controls excluding all cancers) || id:finngen_R11_C3_OSTEOSARCOMA_EXALLC | HLA DR+ Natural Killer %CD3- lymphocyte || id:ebi-a-GCST90001650 | MR Egger | 1.089074 | 2 | 0.58011 |
| ebi-a-GCST90001650 | finngen_R11_C3_OSTEOSARCOMA_EXALLC | Osteosarcoma (controls excluding all cancers) || id:finngen_R11_C3_OSTEOSARCOMA_EXALLC | HLA DR+ Natural Killer %CD3- lymphocyte || id:ebi-a-GCST90001650 | Inverse variance weighted | 1.892494 | 3 | 0.595017 |
| ebi-a-GCST90001654 | finngen_R11_C3_OSTEOSARCOMA_EXALLC | Osteosarcoma (controls excluding all cancers) || id:finngen_R11_C3_OSTEOSARCOMA_EXALLC | CD28- CD4-CD8- T cell Absolute Count || id:ebi-a-GCST90001654 | Inverse variance weighted | 1.522279 | 1 | 0.217275 |
| ebi-a-GCST90001658 | finngen_R11_C3_OSTEOSARCOMA_EXALLC | Osteosarcoma (controls excluding all cancers) || id:finngen_R11_C3_OSTEOSARCOMA_EXALLC | CD39+ CD4+ T cell %T cell || id:ebi-a-GCST90001658 | MR Egger | 1.244715 | 4 | 0.870683 |
| ebi-a-GCST90001658 | finngen_R11_C3_OSTEOSARCOMA_EXALLC | Osteosarcoma (controls excluding all cancers) || id:finngen_R11_C3_OSTEOSARCOMA_EXALLC | CD39+ CD4+ T cell %T cell || id:ebi-a-GCST90001658 | Inverse variance weighted | 1.62091 | 5 | 0.898709 |
| ebi-a-GCST90001659 | finngen_R11_C3_OSTEOSARCOMA_EXALLC | Osteosarcoma (controls excluding all cancers) || id:finngen_R11_C3_OSTEOSARCOMA_EXALLC | CD39+ CD4+ T cell %CD4+ T cell || id:ebi-a-GCST90001659 | MR Egger | 1.25216 | 4 | 0.869438 |
| ebi-a-GCST90001659 | finngen_R11_C3_OSTEOSARCOMA_EXALLC | Osteosarcoma (controls excluding all cancers) || id:finngen_R11_C3_OSTEOSARCOMA_EXALLC | CD39+ CD4+ T cell %CD4+ T cell || id:ebi-a-GCST90001659 | Inverse variance weighted | 1.623706 | 5 | 0.898368 |
| ebi-a-GCST90001660 | finngen_R11_C3_OSTEOSARCOMA_EXALLC | Osteosarcoma (controls excluding all cancers) || id:finngen_R11_C3_OSTEOSARCOMA_EXALLC | CD39+ CD4+ T cell Absolute Count || id:ebi-a-GCST90001660 | MR Egger | 1.194576 | 3 | 0.754305 |
| ebi-a-GCST90001660 | finngen_R11_C3_OSTEOSARCOMA_EXALLC | Osteosarcoma (controls excluding all cancers) || id:finngen_R11_C3_OSTEOSARCOMA_EXALLC | CD39+ CD4+ T cell Absolute Count || id:ebi-a-GCST90001660 | Inverse variance weighted | 1.194835 | 4 | 0.878948 |
| ebi-a-GCST90001661 | finngen_R11_C3_OSTEOSARCOMA_EXALLC | Osteosarcoma (controls excluding all cancers) || id:finngen_R11_C3_OSTEOSARCOMA_EXALLC | CD28- CD8dim T cell %T cell || id:ebi-a-GCST90001661 | MR Egger | 0.274772 | 1 | 0.600148 |
| ebi-a-GCST90001661 | finngen_R11_C3_OSTEOSARCOMA_EXALLC | Osteosarcoma (controls excluding all cancers) || id:finngen_R11_C3_OSTEOSARCOMA_EXALLC | CD28- CD8dim T cell %T cell || id:ebi-a-GCST90001661 | Inverse variance weighted | 4.652099 | 2 | 0.097681 |
| ebi-a-GCST90001663 | finngen_R11_C3_OSTEOSARCOMA_EXALLC | Osteosarcoma (controls excluding all cancers) || id:finngen_R11_C3_OSTEOSARCOMA_EXALLC | CD28- CD8dim T cell Absolute Count || id:ebi-a-GCST90001663 | Inverse variance weighted | 0.347384 | 1 | 0.555598 |
| ebi-a-GCST90001664 | finngen_R11_C3_OSTEOSARCOMA_EXALLC | Osteosarcoma (controls excluding all cancers) || id:finngen_R11_C3_OSTEOSARCOMA_EXALLC | CD28+ CD45RA+ CD8dim T cell %T cell || id:ebi-a-GCST90001664 | MR Egger | 4.05486 | 4 | 0.398632 |
| ebi-a-GCST90001664 | finngen_R11_C3_OSTEOSARCOMA_EXALLC | Osteosarcoma (controls excluding all cancers) || id:finngen_R11_C3_OSTEOSARCOMA_EXALLC | CD28+ CD45RA+ CD8dim T cell %T cell || id:ebi-a-GCST90001664 | Inverse variance weighted | 5.959715 | 5 | 0.310159 |
| ebi-a-GCST90001665 | finngen_R11_C3_OSTEOSARCOMA_EXALLC | Osteosarcoma (controls excluding all cancers) || id:finngen_R11_C3_OSTEOSARCOMA_EXALLC | CD28+ CD45RA+ CD8dim T cell %CD8dim T cell || id:ebi-a-GCST90001665 | MR Egger | 2.432017 | 3 | 0.487703 |
| ebi-a-GCST90001665 | finngen_R11_C3_OSTEOSARCOMA_EXALLC | Osteosarcoma (controls excluding all cancers) || id:finngen_R11_C3_OSTEOSARCOMA_EXALLC | CD28+ CD45RA+ CD8dim T cell %CD8dim T cell || id:ebi-a-GCST90001665 | Inverse variance weighted | 3.560586 | 4 | 0.468726 |
| ebi-a-GCST90001666 | finngen_R11_C3_OSTEOSARCOMA_EXALLC | Osteosarcoma (controls excluding all cancers) || id:finngen_R11_C3_OSTEOSARCOMA_EXALLC | CD28+ CD45RA+ CD8dim T cell Absolute Count || id:ebi-a-GCST90001666 | MR Egger | 7.408315 | 6 | 0.28473 |
| ebi-a-GCST90001666 | finngen_R11_C3_OSTEOSARCOMA_EXALLC | Osteosarcoma (controls excluding all cancers) || id:finngen_R11_C3_OSTEOSARCOMA_EXALLC | CD28+ CD45RA+ CD8dim T cell Absolute Count || id:ebi-a-GCST90001666 | Inverse variance weighted | 7.410388 | 7 | 0.387436 |
| ebi-a-GCST90001667 | finngen_R11_C3_OSTEOSARCOMA_EXALLC | Osteosarcoma (controls excluding all cancers) || id:finngen_R11_C3_OSTEOSARCOMA_EXALLC | CD28+ CD45RA- CD8dim T cell %T cell || id:ebi-a-GCST90001667 | MR Egger | 0.628003 | 1 | 0.428089 |
| ebi-a-GCST90001667 | finngen_R11_C3_OSTEOSARCOMA_EXALLC | Osteosarcoma (controls excluding all cancers) || id:finngen_R11_C3_OSTEOSARCOMA_EXALLC | CD28+ CD45RA- CD8dim T cell %T cell || id:ebi-a-GCST90001667 | Inverse variance weighted | 1.373633 | 2 | 0.503175 |
| ebi-a-GCST90001668 | finngen_R11_C3_OSTEOSARCOMA_EXALLC | Osteosarcoma (controls excluding all cancers) || id:finngen_R11_C3_OSTEOSARCOMA_EXALLC | CD28+ CD45RA- CD8dim T cell %CD8dim T cell || id:ebi-a-GCST90001668 | Inverse variance weighted | 0.093416 | 1 | 0.759879 |
| ebi-a-GCST90001669 | finngen_R11_C3_OSTEOSARCOMA_EXALLC | Osteosarcoma (controls excluding all cancers) || id:finngen_R11_C3_OSTEOSARCOMA_EXALLC | CD28+ CD45RA- CD8dim T cell Absolute Count || id:ebi-a-GCST90001669 | MR Egger | 0.451935 | 1 | 0.501417 |
| ebi-a-GCST90001669 | finngen_R11_C3_OSTEOSARCOMA_EXALLC | Osteosarcoma (controls excluding all cancers) || id:finngen_R11_C3_OSTEOSARCOMA_EXALLC | CD28+ CD45RA- CD8dim T cell Absolute Count || id:ebi-a-GCST90001669 | Inverse variance weighted | 0.553898 | 2 | 0.758093 |
| ebi-a-GCST90001670 | finngen_R11_C3_OSTEOSARCOMA_EXALLC | Osteosarcoma (controls excluding all cancers) || id:finngen_R11_C3_OSTEOSARCOMA_EXALLC | CD39+ CD8+ T cell %T cell || id:ebi-a-GCST90001670 | MR Egger | 2.354605 | 6 | 0.884372 |
| ebi-a-GCST90001670 | finngen_R11_C3_OSTEOSARCOMA_EXALLC | Osteosarcoma (controls excluding all cancers) || id:finngen_R11_C3_OSTEOSARCOMA_EXALLC | CD39+ CD8+ T cell %T cell || id:ebi-a-GCST90001670 | Inverse variance weighted | 2.460736 | 7 | 0.930025 |
| ebi-a-GCST90001671 | finngen_R11_C3_OSTEOSARCOMA_EXALLC | Osteosarcoma (controls excluding all cancers) || id:finngen_R11_C3_OSTEOSARCOMA_EXALLC | CD39+ CD8+ T cell %CD8+ T cell || id:ebi-a-GCST90001671 | MR Egger | 3.045706 | 5 | 0.692939 |
| ebi-a-GCST90001671 | finngen_R11_C3_OSTEOSARCOMA_EXALLC | Osteosarcoma (controls excluding all cancers) || id:finngen_R11_C3_OSTEOSARCOMA_EXALLC | CD39+ CD8+ T cell %CD8+ T cell || id:ebi-a-GCST90001671 | Inverse variance weighted | 3.125455 | 6 | 0.792944 |
| ebi-a-GCST90001672 | finngen_R11_C3_OSTEOSARCOMA_EXALLC | Osteosarcoma (controls excluding all cancers) || id:finngen_R11_C3_OSTEOSARCOMA_EXALLC | CD39+ CD8+ T cell Absolute Count || id:ebi-a-GCST90001672 | MR Egger | 2.037946 | 5 | 0.84387 |
| ebi-a-GCST90001672 | finngen_R11_C3_OSTEOSARCOMA_EXALLC | Osteosarcoma (controls excluding all cancers) || id:finngen_R11_C3_OSTEOSARCOMA_EXALLC | CD39+ CD8+ T cell Absolute Count || id:ebi-a-GCST90001672 | Inverse variance weighted | 2.103738 | 6 | 0.909915 |
| ebi-a-GCST90001679 | finngen_R11_C3_OSTEOSARCOMA_EXALLC | Osteosarcoma (controls excluding all cancers) || id:finngen_R11_C3_OSTEOSARCOMA_EXALLC | CD25++ CD8+ T cell %T cell || id:ebi-a-GCST90001679 | Inverse variance weighted | 1.125036 | 1 | 0.288837 |
| ebi-a-GCST90001681 | finngen_R11_C3_OSTEOSARCOMA_EXALLC | Osteosarcoma (controls excluding all cancers) || id:finngen_R11_C3_OSTEOSARCOMA_EXALLC | CD25++ CD8+ T cell Absolute Count || id:ebi-a-GCST90001681 | MR Egger | 0.122351 | 1 | 0.726499 |
| ebi-a-GCST90001681 | finngen_R11_C3_OSTEOSARCOMA_EXALLC | Osteosarcoma (controls excluding all cancers) || id:finngen_R11_C3_OSTEOSARCOMA_EXALLC | CD25++ CD8+ T cell Absolute Count || id:ebi-a-GCST90001681 | Inverse variance weighted | 5.158577 | 2 | 0.075828 |
| ebi-a-GCST90001686 | finngen_R11_C3_OSTEOSARCOMA_EXALLC | Osteosarcoma (controls excluding all cancers) || id:finngen_R11_C3_OSTEOSARCOMA_EXALLC | CD28- CD8+ T cell %CD8+ T cell || id:ebi-a-GCST90001686 | MR Egger | 0.387356 | 1 | 0.533693 |
| ebi-a-GCST90001686 | finngen_R11_C3_OSTEOSARCOMA_EXALLC | Osteosarcoma (controls excluding all cancers) || id:finngen_R11_C3_OSTEOSARCOMA_EXALLC | CD28- CD8+ T cell %CD8+ T cell || id:ebi-a-GCST90001686 | Inverse variance weighted | 2.151969 | 2 | 0.340962 |
| ebi-a-GCST90001687 | finngen_R11_C3_OSTEOSARCOMA_EXALLC | Osteosarcoma (controls excluding all cancers) || id:finngen_R11_C3_OSTEOSARCOMA_EXALLC | CD28- CD8+ T cell Absolute Count || id:ebi-a-GCST90001687 | MR Egger | 0.279603 | 1 | 0.596961 |
| ebi-a-GCST90001687 | finngen_R11_C3_OSTEOSARCOMA_EXALLC | Osteosarcoma (controls excluding all cancers) || id:finngen_R11_C3_OSTEOSARCOMA_EXALLC | CD28- CD8+ T cell Absolute Count || id:ebi-a-GCST90001687 | Inverse variance weighted | 1.037305 | 2 | 0.595322 |
| ebi-a-GCST90001688 | finngen_R11_C3_OSTEOSARCOMA_EXALLC | Osteosarcoma (controls excluding all cancers) || id:finngen_R11_C3_OSTEOSARCOMA_EXALLC | CD28+ CD45RA+ CD8+ T cell %T cell || id:ebi-a-GCST90001688 | MR Egger | 24.50988 | 35 | 0.907403 |
| ebi-a-GCST90001688 | finngen_R11_C3_OSTEOSARCOMA_EXALLC | Osteosarcoma (controls excluding all cancers) || id:finngen_R11_C3_OSTEOSARCOMA_EXALLC | CD28+ CD45RA+ CD8+ T cell %T cell || id:ebi-a-GCST90001688 | Inverse variance weighted | 25.9547 | 36 | 0.891706 |
| ebi-a-GCST90001690 | finngen_R11_C3_OSTEOSARCOMA_EXALLC | Osteosarcoma (controls excluding all cancers) || id:finngen_R11_C3_OSTEOSARCOMA_EXALLC | CD28+ CD45RA+ CD8+ T cell Absolute Count || id:ebi-a-GCST90001690 | MR Egger | 0.640468 | 1 | 0.423542 |
| ebi-a-GCST90001690 | finngen_R11_C3_OSTEOSARCOMA_EXALLC | Osteosarcoma (controls excluding all cancers) || id:finngen_R11_C3_OSTEOSARCOMA_EXALLC | CD28+ CD45RA+ CD8+ T cell Absolute Count || id:ebi-a-GCST90001690 | Inverse variance weighted | 6.456238 | 2 | 0.039632 |
| ebi-a-GCST90001691 | finngen_R11_C3_OSTEOSARCOMA_EXALLC | Osteosarcoma (controls excluding all cancers) || id:finngen_R11_C3_OSTEOSARCOMA_EXALLC | CD28+ CD45RA- CD8+ T cell %T cell || id:ebi-a-GCST90001691 | MR Egger | 0.017704 | 1 | 0.894148 |
| ebi-a-GCST90001691 | finngen_R11_C3_OSTEOSARCOMA_EXALLC | Osteosarcoma (controls excluding all cancers) || id:finngen_R11_C3_OSTEOSARCOMA_EXALLC | CD28+ CD45RA- CD8+ T cell %T cell || id:ebi-a-GCST90001691 | Inverse variance weighted | 1.482143 | 2 | 0.476603 |
| ebi-a-GCST90001692 | finngen_R11_C3_OSTEOSARCOMA_EXALLC | Osteosarcoma (controls excluding all cancers) || id:finngen_R11_C3_OSTEOSARCOMA_EXALLC | CD28+ CD45RA- CD8+ T cell %CD8+ T cell || id:ebi-a-GCST90001692 | MR Egger | 0.043686 | 1 | 0.834439 |
| ebi-a-GCST90001692 | finngen_R11_C3_OSTEOSARCOMA_EXALLC | Osteosarcoma (controls excluding all cancers) || id:finngen_R11_C3_OSTEOSARCOMA_EXALLC | CD28+ CD45RA- CD8+ T cell %CD8+ T cell || id:ebi-a-GCST90001692 | Inverse variance weighted | 0.195069 | 2 | 0.907071 |
| ebi-a-GCST90001693 | finngen_R11_C3_OSTEOSARCOMA_EXALLC | Osteosarcoma (controls excluding all cancers) || id:finngen_R11_C3_OSTEOSARCOMA_EXALLC | CD28+ CD45RA- CD8+ T cell Absolute Count || id:ebi-a-GCST90001693 | Inverse variance weighted | 0.001685 | 1 | 0.967254 |
| ebi-a-GCST90001694 | finngen_R11_C3_OSTEOSARCOMA_EXALLC | Osteosarcoma (controls excluding all cancers) || id:finngen_R11_C3_OSTEOSARCOMA_EXALLC | CD28- CD4-CD8- T cell %T cell || id:ebi-a-GCST90001694 | MR Egger | 0.187683 | 1 | 0.664852 |
| ebi-a-GCST90001694 | finngen_R11_C3_OSTEOSARCOMA_EXALLC | Osteosarcoma (controls excluding all cancers) || id:finngen_R11_C3_OSTEOSARCOMA_EXALLC | CD28- CD4-CD8- T cell %T cell || id:ebi-a-GCST90001694 | Inverse variance weighted | 5.803619 | 2 | 0.054924 |
| ebi-a-GCST90001695 | finngen_R11_C3_OSTEOSARCOMA_EXALLC | Osteosarcoma (controls excluding all cancers) || id:finngen_R11_C3_OSTEOSARCOMA_EXALLC | CD45RA- CD28- CD8+ T cell Absolute Count || id:ebi-a-GCST90001695 | MR Egger | 122.4294 | 142 | 0.880871 |
| ebi-a-GCST90001695 | finngen_R11_C3_OSTEOSARCOMA_EXALLC | Osteosarcoma (controls excluding all cancers) || id:finngen_R11_C3_OSTEOSARCOMA_EXALLC | CD45RA- CD28- CD8+ T cell Absolute Count || id:ebi-a-GCST90001695 | Inverse variance weighted | 124.1059 | 143 | 0.870916 |
| ebi-a-GCST90001696 | finngen_R11_C3_OSTEOSARCOMA_EXALLC | Osteosarcoma (controls excluding all cancers) || id:finngen_R11_C3_OSTEOSARCOMA_EXALLC | CD45RA- CD28- CD8+ T cell %CD8+ T cell || id:ebi-a-GCST90001696 | MR Egger | 6.398306 | 8 | 0.602708 |
| ebi-a-GCST90001696 | finngen_R11_C3_OSTEOSARCOMA_EXALLC | Osteosarcoma (controls excluding all cancers) || id:finngen_R11_C3_OSTEOSARCOMA_EXALLC | CD45RA- CD28- CD8+ T cell %CD8+ T cell || id:ebi-a-GCST90001696 | Inverse variance weighted | 8.913147 | 9 | 0.44533 |
| ebi-a-GCST90001697 | finngen_R11_C3_OSTEOSARCOMA_EXALLC | Osteosarcoma (controls excluding all cancers) || id:finngen_R11_C3_OSTEOSARCOMA_EXALLC | CD45RA- CD28- CD8+ T cell %T cell || id:ebi-a-GCST90001697 | MR Egger | 24.3592 | 39 | 0.967777 |
| ebi-a-GCST90001697 | finngen_R11_C3_OSTEOSARCOMA_EXALLC | Osteosarcoma (controls excluding all cancers) || id:finngen_R11_C3_OSTEOSARCOMA_EXALLC | CD45RA- CD28- CD8+ T cell %T cell || id:ebi-a-GCST90001697 | Inverse variance weighted | 24.99354 | 40 | 0.969474 |
| ebi-a-GCST90001698 | finngen_R11_C3_OSTEOSARCOMA_EXALLC | Osteosarcoma (controls excluding all cancers) || id:finngen_R11_C3_OSTEOSARCOMA_EXALLC | CD45RA+ CD28- CD8+ T cell Absolute Count || id:ebi-a-GCST90001698 | MR Egger | 410.7652 | 426 | 0.693354 |
| ebi-a-GCST90001698 | finngen_R11_C3_OSTEOSARCOMA_EXALLC | Osteosarcoma (controls excluding all cancers) || id:finngen_R11_C3_OSTEOSARCOMA_EXALLC | CD45RA+ CD28- CD8+ T cell Absolute Count || id:ebi-a-GCST90001698 | Inverse variance weighted | 410.7654 | 427 | 0.705349 |
| ebi-a-GCST90001700 | finngen_R11_C3_OSTEOSARCOMA_EXALLC | Osteosarcoma (controls excluding all cancers) || id:finngen_R11_C3_OSTEOSARCOMA_EXALLC | CD45RA+ CD28- CD8+ T cell %T cell || id:ebi-a-GCST90001700 | MR Egger | 59.94093 | 63 | 0.586046 |
| ebi-a-GCST90001700 | finngen_R11_C3_OSTEOSARCOMA_EXALLC | Osteosarcoma (controls excluding all cancers) || id:finngen_R11_C3_OSTEOSARCOMA_EXALLC | CD45RA+ CD28- CD8+ T cell %T cell || id:ebi-a-GCST90001700 | Inverse variance weighted | 59.98265 | 64 | 0.619253 |
| ebi-a-GCST90001702 | finngen_R11_C3_OSTEOSARCOMA_EXALLC | Osteosarcoma (controls excluding all cancers) || id:finngen_R11_C3_OSTEOSARCOMA_EXALLC | BAFF-R on CD24+ CD27+ B cell || id:ebi-a-GCST90001702 | MR Egger | 6.130963 | 7 | 0.524544 |
| ebi-a-GCST90001702 | finngen_R11_C3_OSTEOSARCOMA_EXALLC | Osteosarcoma (controls excluding all cancers) || id:finngen_R11_C3_OSTEOSARCOMA_EXALLC | BAFF-R on CD24+ CD27+ B cell || id:ebi-a-GCST90001702 | Inverse variance weighted | 6.131816 | 8 | 0.632469 |
| ebi-a-GCST90001703 | finngen_R11_C3_OSTEOSARCOMA_EXALLC | Osteosarcoma (controls excluding all cancers) || id:finngen_R11_C3_OSTEOSARCOMA_EXALLC | BAFF-R on IgD+ CD24+ B cell || id:ebi-a-GCST90001703 | MR Egger | 3.222678 | 5 | 0.665699 |
| ebi-a-GCST90001703 | finngen_R11_C3_OSTEOSARCOMA_EXALLC | Osteosarcoma (controls excluding all cancers) || id:finngen_R11_C3_OSTEOSARCOMA_EXALLC | BAFF-R on IgD+ CD24+ B cell || id:ebi-a-GCST90001703 | Inverse variance weighted | 3.273957 | 6 | 0.77376 |
| ebi-a-GCST90001704 | finngen_R11_C3_OSTEOSARCOMA_EXALLC | Osteosarcoma (controls excluding all cancers) || id:finngen_R11_C3_OSTEOSARCOMA_EXALLC | BAFF-R on IgD+ CD24- B cell || id:ebi-a-GCST90001704 | MR Egger | 10.3421 | 8 | 0.241831 |
| ebi-a-GCST90001704 | finngen_R11_C3_OSTEOSARCOMA_EXALLC | Osteosarcoma (controls excluding all cancers) || id:finngen_R11_C3_OSTEOSARCOMA_EXALLC | BAFF-R on IgD+ CD24- B cell || id:ebi-a-GCST90001704 | Inverse variance weighted | 10.90562 | 9 | 0.282234 |
| ebi-a-GCST90001705 | finngen_R11_C3_OSTEOSARCOMA_EXALLC | Osteosarcoma (controls excluding all cancers) || id:finngen_R11_C3_OSTEOSARCOMA_EXALLC | BAFF-R on IgD+ CD38- B cell || id:ebi-a-GCST90001705 | MR Egger | 6.466919 | 7 | 0.486405 |
| ebi-a-GCST90001705 | finngen_R11_C3_OSTEOSARCOMA_EXALLC | Osteosarcoma (controls excluding all cancers) || id:finngen_R11_C3_OSTEOSARCOMA_EXALLC | BAFF-R on IgD+ CD38- B cell || id:ebi-a-GCST90001705 | Inverse variance weighted | 10.07761 | 8 | 0.259621 |
| ebi-a-GCST90001706 | finngen_R11_C3_OSTEOSARCOMA_EXALLC | Osteosarcoma (controls excluding all cancers) || id:finngen_R11_C3_OSTEOSARCOMA_EXALLC | BAFF-R on IgD+ CD38- naive B cell || id:ebi-a-GCST90001706 | MR Egger | 5.552533 | 6 | 0.47513 |
| ebi-a-GCST90001706 | finngen_R11_C3_OSTEOSARCOMA_EXALLC | Osteosarcoma (controls excluding all cancers) || id:finngen_R11_C3_OSTEOSARCOMA_EXALLC | BAFF-R on IgD+ CD38- naive B cell || id:ebi-a-GCST90001706 | Inverse variance weighted | 9.991232 | 7 | 0.189071 |
| ebi-a-GCST90001707 | finngen_R11_C3_OSTEOSARCOMA_EXALLC | Osteosarcoma (controls excluding all cancers) || id:finngen_R11_C3_OSTEOSARCOMA_EXALLC | BAFF-R on IgD+ CD38- unswitched memory B cell || id:ebi-a-GCST90001707 | MR Egger | 2.767404 | 5 | 0.735792 |
| ebi-a-GCST90001707 | finngen_R11_C3_OSTEOSARCOMA_EXALLC | Osteosarcoma (controls excluding all cancers) || id:finngen_R11_C3_OSTEOSARCOMA_EXALLC | BAFF-R on IgD+ CD38- unswitched memory B cell || id:ebi-a-GCST90001707 | Inverse variance weighted | 3.048224 | 6 | 0.80277 |
| ebi-a-GCST90001708 | finngen_R11_C3_OSTEOSARCOMA_EXALLC | Osteosarcoma (controls excluding all cancers) || id:finngen_R11_C3_OSTEOSARCOMA_EXALLC | BAFF-R on IgD+ CD38+ B cell || id:ebi-a-GCST90001708 | MR Egger | 10.64192 | 8 | 0.222826 |
| ebi-a-GCST90001708 | finngen_R11_C3_OSTEOSARCOMA_EXALLC | Osteosarcoma (controls excluding all cancers) || id:finngen_R11_C3_OSTEOSARCOMA_EXALLC | BAFF-R on IgD+ CD38+ B cell || id:ebi-a-GCST90001708 | Inverse variance weighted | 11.09356 | 9 | 0.26935 |
| ebi-a-GCST90001709 | finngen_R11_C3_OSTEOSARCOMA_EXALLC | Osteosarcoma (controls excluding all cancers) || id:finngen_R11_C3_OSTEOSARCOMA_EXALLC | BAFF-R on IgD+ CD38dim B cell || id:ebi-a-GCST90001709 | MR Egger | 10.36658 | 8 | 0.240233 |
| ebi-a-GCST90001709 | finngen_R11_C3_OSTEOSARCOMA_EXALLC | Osteosarcoma (controls excluding all cancers) || id:finngen_R11_C3_OSTEOSARCOMA_EXALLC | BAFF-R on IgD+ CD38dim B cell || id:ebi-a-GCST90001709 | Inverse variance weighted | 10.96549 | 9 | 0.278082 |
| ebi-a-GCST90001710 | finngen_R11_C3_OSTEOSARCOMA_EXALLC | Osteosarcoma (controls excluding all cancers) || id:finngen_R11_C3_OSTEOSARCOMA_EXALLC | BAFF-R on IgD- CD24- B cell || id:ebi-a-GCST90001710 | MR Egger | 4.374239 | 7 | 0.735803 |
| ebi-a-GCST90001710 | finngen_R11_C3_OSTEOSARCOMA_EXALLC | Osteosarcoma (controls excluding all cancers) || id:finngen_R11_C3_OSTEOSARCOMA_EXALLC | BAFF-R on IgD- CD24- B cell || id:ebi-a-GCST90001710 | Inverse variance weighted | 5.759875 | 8 | 0.674109 |
| ebi-a-GCST90001711 | finngen_R11_C3_OSTEOSARCOMA_EXALLC | Osteosarcoma (controls excluding all cancers) || id:finngen_R11_C3_OSTEOSARCOMA_EXALLC | BAFF-R on IgD- CD27- B cell || id:ebi-a-GCST90001711 | MR Egger | 4.3598 | 7 | 0.737527 |
| ebi-a-GCST90001711 | finngen_R11_C3_OSTEOSARCOMA_EXALLC | Osteosarcoma (controls excluding all cancers) || id:finngen_R11_C3_OSTEOSARCOMA_EXALLC | BAFF-R on IgD- CD27- B cell || id:ebi-a-GCST90001711 | Inverse variance weighted | 5.731355 | 8 | 0.677295 |
| ebi-a-GCST90001712 | finngen_R11_C3_OSTEOSARCOMA_EXALLC | Osteosarcoma (controls excluding all cancers) || id:finngen_R11_C3_OSTEOSARCOMA_EXALLC | BAFF-R on IgD- CD38- B cell || id:ebi-a-GCST90001712 | MR Egger | 3.545301 | 5 | 0.616544 |
| ebi-a-GCST90001712 | finngen_R11_C3_OSTEOSARCOMA_EXALLC | Osteosarcoma (controls excluding all cancers) || id:finngen_R11_C3_OSTEOSARCOMA_EXALLC | BAFF-R on IgD- CD38- B cell || id:ebi-a-GCST90001712 | Inverse variance weighted | 3.678036 | 6 | 0.720152 |
| ebi-a-GCST90001713 | finngen_R11_C3_OSTEOSARCOMA_EXALLC | Osteosarcoma (controls excluding all cancers) || id:finngen_R11_C3_OSTEOSARCOMA_EXALLC | BAFF-R on IgD- CD38+ B cell || id:ebi-a-GCST90001713 | MR Egger | 0.009216 | 1 | 0.923522 |
| ebi-a-GCST90001713 | finngen_R11_C3_OSTEOSARCOMA_EXALLC | Osteosarcoma (controls excluding all cancers) || id:finngen_R11_C3_OSTEOSARCOMA_EXALLC | BAFF-R on IgD- CD38+ B cell || id:ebi-a-GCST90001713 | Inverse variance weighted | 0.362118 | 2 | 0.834386 |
| ebi-a-GCST90001715 | finngen_R11_C3_OSTEOSARCOMA_EXALLC | Osteosarcoma (controls excluding all cancers) || id:finngen_R11_C3_OSTEOSARCOMA_EXALLC | BAFF-R on memory B cell || id:ebi-a-GCST90001715 | MR Egger | 5.781028 | 7 | 0.565538 |
| ebi-a-GCST90001715 | finngen_R11_C3_OSTEOSARCOMA_EXALLC | Osteosarcoma (controls excluding all cancers) || id:finngen_R11_C3_OSTEOSARCOMA_EXALLC | BAFF-R on memory B cell || id:ebi-a-GCST90001715 | Inverse variance weighted | 5.79994 | 8 | 0.66963 |
| ebi-a-GCST90001716 | finngen_R11_C3_OSTEOSARCOMA_EXALLC | Osteosarcoma (controls excluding all cancers) || id:finngen_R11_C3_OSTEOSARCOMA_EXALLC | BAFF-R on naive-mature B cell || id:ebi-a-GCST90001716 | MR Egger | 10.32519 | 8 | 0.24294 |
| ebi-a-GCST90001716 | finngen_R11_C3_OSTEOSARCOMA_EXALLC | Osteosarcoma (controls excluding all cancers) || id:finngen_R11_C3_OSTEOSARCOMA_EXALLC | BAFF-R on naive-mature B cell || id:ebi-a-GCST90001716 | Inverse variance weighted | 10.95665 | 9 | 0.278692 |
| ebi-a-GCST90001717 | finngen_R11_C3_OSTEOSARCOMA_EXALLC | Osteosarcoma (controls excluding all cancers) || id:finngen_R11_C3_OSTEOSARCOMA_EXALLC | BAFF-R on unswitched memory B cell || id:ebi-a-GCST90001717 | MR Egger | 5.705478 | 7 | 0.574529 |
| ebi-a-GCST90001717 | finngen_R11_C3_OSTEOSARCOMA_EXALLC | Osteosarcoma (controls excluding all cancers) || id:finngen_R11_C3_OSTEOSARCOMA_EXALLC | BAFF-R on unswitched memory B cell || id:ebi-a-GCST90001717 | Inverse variance weighted | 5.720957 | 8 | 0.678456 |
| ebi-a-GCST90001718 | finngen_R11_C3_OSTEOSARCOMA_EXALLC | Osteosarcoma (controls excluding all cancers) || id:finngen_R11_C3_OSTEOSARCOMA_EXALLC | BAFF-R on switched memory B cell || id:ebi-a-GCST90001718 | MR Egger | 6.485829 | 8 | 0.59298 |
| ebi-a-GCST90001718 | finngen_R11_C3_OSTEOSARCOMA_EXALLC | Osteosarcoma (controls excluding all cancers) || id:finngen_R11_C3_OSTEOSARCOMA_EXALLC | BAFF-R on switched memory B cell || id:ebi-a-GCST90001718 | Inverse variance weighted | 6.777921 | 9 | 0.660228 |
| ebi-a-GCST90001719 | finngen_R11_C3_OSTEOSARCOMA_EXALLC | Osteosarcoma (controls excluding all cancers) || id:finngen_R11_C3_OSTEOSARCOMA_EXALLC | BAFF-R on IgD+ B cell || id:ebi-a-GCST90001719 | MR Egger | 10.75547 | 8 | 0.215943 |
| ebi-a-GCST90001719 | finngen_R11_C3_OSTEOSARCOMA_EXALLC | Osteosarcoma (controls excluding all cancers) || id:finngen_R11_C3_OSTEOSARCOMA_EXALLC | BAFF-R on IgD+ B cell || id:ebi-a-GCST90001719 | Inverse variance weighted | 11.51961 | 9 | 0.241765 |
| ebi-a-GCST90001720 | finngen_R11_C3_OSTEOSARCOMA_EXALLC | Osteosarcoma (controls excluding all cancers) || id:finngen_R11_C3_OSTEOSARCOMA_EXALLC | BAFF-R on transitional B cell || id:ebi-a-GCST90001720 | MR Egger | 5.14002 | 6 | 0.525984 |
| ebi-a-GCST90001720 | finngen_R11_C3_OSTEOSARCOMA_EXALLC | Osteosarcoma (controls excluding all cancers) || id:finngen_R11_C3_OSTEOSARCOMA_EXALLC | BAFF-R on transitional B cell || id:ebi-a-GCST90001720 | Inverse variance weighted | 9.149286 | 7 | 0.242115 |
| ebi-a-GCST90001723 | finngen_R11_C3_OSTEOSARCOMA_EXALLC | Osteosarcoma (controls excluding all cancers) || id:finngen_R11_C3_OSTEOSARCOMA_EXALLC | CD19 on CD24+ CD27+ B cell || id:ebi-a-GCST90001723 | MR Egger | 0.196025 | 1 | 0.657948 |
| ebi-a-GCST90001723 | finngen_R11_C3_OSTEOSARCOMA_EXALLC | Osteosarcoma (controls excluding all cancers) || id:finngen_R11_C3_OSTEOSARCOMA_EXALLC | CD19 on CD24+ CD27+ B cell || id:ebi-a-GCST90001723 | Inverse variance weighted | 0.20815 | 2 | 0.901158 |
| ebi-a-GCST90001724 | finngen_R11_C3_OSTEOSARCOMA_EXALLC | Osteosarcoma (controls excluding all cancers) || id:finngen_R11_C3_OSTEOSARCOMA_EXALLC | CD19 on IgD+ CD24+ B cell || id:ebi-a-GCST90001724 | MR Egger | 3.954003 | 2 | 0.138484 |
| ebi-a-GCST90001724 | finngen_R11_C3_OSTEOSARCOMA_EXALLC | Osteosarcoma (controls excluding all cancers) || id:finngen_R11_C3_OSTEOSARCOMA_EXALLC | CD19 on IgD+ CD24+ B cell || id:ebi-a-GCST90001724 | Inverse variance weighted | 3.964786 | 3 | 0.265292 |
| ebi-a-GCST90001725 | finngen_R11_C3_OSTEOSARCOMA_EXALLC | Osteosarcoma (controls excluding all cancers) || id:finngen_R11_C3_OSTEOSARCOMA_EXALLC | CD19 on IgD+ CD24- B cell || id:ebi-a-GCST90001725 | MR Egger | 4.010828 | 2 | 0.134605 |
| ebi-a-GCST90001725 | finngen_R11_C3_OSTEOSARCOMA_EXALLC | Osteosarcoma (controls excluding all cancers) || id:finngen_R11_C3_OSTEOSARCOMA_EXALLC | CD19 on IgD+ CD24- B cell || id:ebi-a-GCST90001725 | Inverse variance weighted | 4.443108 | 3 | 0.217421 |
| ebi-a-GCST90001728 | finngen_R11_C3_OSTEOSARCOMA_EXALLC | Osteosarcoma (controls excluding all cancers) || id:finngen_R11_C3_OSTEOSARCOMA_EXALLC | CD19 on IgD+ CD38- unswitched memory B cell || id:ebi-a-GCST90001728 | MR Egger | 1.257389 | 1 | 0.262146 |
| ebi-a-GCST90001728 | finngen_R11_C3_OSTEOSARCOMA_EXALLC | Osteosarcoma (controls excluding all cancers) || id:finngen_R11_C3_OSTEOSARCOMA_EXALLC | CD19 on IgD+ CD38- unswitched memory B cell || id:ebi-a-GCST90001728 | Inverse variance weighted | 1.420283 | 2 | 0.491575 |
| ebi-a-GCST90001729 | finngen_R11_C3_OSTEOSARCOMA_EXALLC | Osteosarcoma (controls excluding all cancers) || id:finngen_R11_C3_OSTEOSARCOMA_EXALLC | CD19 on IgD+ CD38+ B cell || id:ebi-a-GCST90001729 | MR Egger | 1.522244 | 2 | 0.467142 |
| ebi-a-GCST90001729 | finngen_R11_C3_OSTEOSARCOMA_EXALLC | Osteosarcoma (controls excluding all cancers) || id:finngen_R11_C3_OSTEOSARCOMA_EXALLC | CD19 on IgD+ CD38+ B cell || id:ebi-a-GCST90001729 | Inverse variance weighted | 4.463413 | 3 | 0.215577 |
| ebi-a-GCST90001730 | finngen_R11_C3_OSTEOSARCOMA_EXALLC | Osteosarcoma (controls excluding all cancers) || id:finngen_R11_C3_OSTEOSARCOMA_EXALLC | CD19 on IgD+ CD38dim B cell || id:ebi-a-GCST90001730 | MR Egger | 1.433542 | 2 | 0.488327 |
| ebi-a-GCST90001730 | finngen_R11_C3_OSTEOSARCOMA_EXALLC | Osteosarcoma (controls excluding all cancers) || id:finngen_R11_C3_OSTEOSARCOMA_EXALLC | CD19 on IgD+ CD38dim B cell || id:ebi-a-GCST90001730 | Inverse variance weighted | 4.379554 | 3 | 0.223289 |
| ebi-a-GCST90001735 | finngen_R11_C3_OSTEOSARCOMA_EXALLC | Osteosarcoma (controls excluding all cancers) || id:finngen_R11_C3_OSTEOSARCOMA_EXALLC | CD19 on IgD- CD38dim B cell || id:ebi-a-GCST90001735 | MR Egger | 0.989259 | 2 | 0.609797 |
| ebi-a-GCST90001735 | finngen_R11_C3_OSTEOSARCOMA_EXALLC | Osteosarcoma (controls excluding all cancers) || id:finngen_R11_C3_OSTEOSARCOMA_EXALLC | CD19 on IgD- CD38dim B cell || id:ebi-a-GCST90001735 | Inverse variance weighted | 0.996091 | 3 | 0.802198 |
| ebi-a-GCST90001736 | finngen_R11_C3_OSTEOSARCOMA_EXALLC | Osteosarcoma (controls excluding all cancers) || id:finngen_R11_C3_OSTEOSARCOMA_EXALLC | CD19 on memory B cell || id:ebi-a-GCST90001736 | MR Egger | 0.185995 | 1 | 0.666271 |
| ebi-a-GCST90001736 | finngen_R11_C3_OSTEOSARCOMA_EXALLC | Osteosarcoma (controls excluding all cancers) || id:finngen_R11_C3_OSTEOSARCOMA_EXALLC | CD19 on memory B cell || id:ebi-a-GCST90001736 | Inverse variance weighted | 0.189664 | 2 | 0.909526 |
| ebi-a-GCST90001737 | finngen_R11_C3_OSTEOSARCOMA_EXALLC | Osteosarcoma (controls excluding all cancers) || id:finngen_R11_C3_OSTEOSARCOMA_EXALLC | CD19 on naive-mature B cell || id:ebi-a-GCST90001737 | Inverse variance weighted | 1.800868 | 1 | 0.179608 |
| ebi-a-GCST90001738 | finngen_R11_C3_OSTEOSARCOMA_EXALLC | Osteosarcoma (controls excluding all cancers) || id:finngen_R11_C3_OSTEOSARCOMA_EXALLC | CD19 on unswitched memory B cell || id:ebi-a-GCST90001738 | MR Egger | 1.350609 | 2 | 0.509001 |
| ebi-a-GCST90001738 | finngen_R11_C3_OSTEOSARCOMA_EXALLC | Osteosarcoma (controls excluding all cancers) || id:finngen_R11_C3_OSTEOSARCOMA_EXALLC | CD19 on unswitched memory B cell || id:ebi-a-GCST90001738 | Inverse variance weighted | 4.242809 | 3 | 0.236411 |
| ebi-a-GCST90001740 | finngen_R11_C3_OSTEOSARCOMA_EXALLC | Osteosarcoma (controls excluding all cancers) || id:finngen_R11_C3_OSTEOSARCOMA_EXALLC | CD19 on switched memory B cell || id:ebi-a-GCST90001740 | Inverse variance weighted | 0.600217 | 1 | 0.438495 |
| ebi-a-GCST90001741 | finngen_R11_C3_OSTEOSARCOMA_EXALLC | Osteosarcoma (controls excluding all cancers) || id:finngen_R11_C3_OSTEOSARCOMA_EXALLC | CD19 on IgD+ B cell || id:ebi-a-GCST90001741 | Inverse variance weighted | 1.328578 | 1 | 0.249058 |
| ebi-a-GCST90001742 | finngen_R11_C3_OSTEOSARCOMA_EXALLC | Osteosarcoma (controls excluding all cancers) || id:finngen_R11_C3_OSTEOSARCOMA_EXALLC | CD19 on transitional B cell || id:ebi-a-GCST90001742 | MR Egger | 1.521004 | 2 | 0.467432 |
| ebi-a-GCST90001742 | finngen_R11_C3_OSTEOSARCOMA_EXALLC | Osteosarcoma (controls excluding all cancers) || id:finngen_R11_C3_OSTEOSARCOMA_EXALLC | CD19 on transitional B cell || id:ebi-a-GCST90001742 | Inverse variance weighted | 4.390713 | 3 | 0.222248 |
| ebi-a-GCST90001743 | finngen_R11_C3_OSTEOSARCOMA_EXALLC | Osteosarcoma (controls excluding all cancers) || id:finngen_R11_C3_OSTEOSARCOMA_EXALLC | CD20 on B cell || id:ebi-a-GCST90001743 | MR Egger | 1.37003 | 2 | 0.504083 |
| ebi-a-GCST90001743 | finngen_R11_C3_OSTEOSARCOMA_EXALLC | Osteosarcoma (controls excluding all cancers) || id:finngen_R11_C3_OSTEOSARCOMA_EXALLC | CD20 on B cell || id:ebi-a-GCST90001743 | Inverse variance weighted | 2.80333 | 3 | 0.422952 |
| ebi-a-GCST90001745 | finngen_R11_C3_OSTEOSARCOMA_EXALLC | Osteosarcoma (controls excluding all cancers) || id:finngen_R11_C3_OSTEOSARCOMA_EXALLC | CD20 on CD24+ CD27+ B cell || id:ebi-a-GCST90001745 | MR Egger | 3.961945 | 3 | 0.265603 |
| ebi-a-GCST90001745 | finngen_R11_C3_OSTEOSARCOMA_EXALLC | Osteosarcoma (controls excluding all cancers) || id:finngen_R11_C3_OSTEOSARCOMA_EXALLC | CD20 on CD24+ CD27+ B cell || id:ebi-a-GCST90001745 | Inverse variance weighted | 5.290886 | 4 | 0.258731 |
| ebi-a-GCST90001746 | finngen_R11_C3_OSTEOSARCOMA_EXALLC | Osteosarcoma (controls excluding all cancers) || id:finngen_R11_C3_OSTEOSARCOMA_EXALLC | CD20 on IgD+ CD24+ B cell || id:ebi-a-GCST90001746 | Inverse variance weighted | 1.506735 | 1 | 0.219638 |
| ebi-a-GCST90001747 | finngen_R11_C3_OSTEOSARCOMA_EXALLC | Osteosarcoma (controls excluding all cancers) || id:finngen_R11_C3_OSTEOSARCOMA_EXALLC | CD20 on IgD+ CD24- B cell || id:ebi-a-GCST90001747 | MR Egger | 0.811368 | 2 | 0.666521 |
| ebi-a-GCST90001747 | finngen_R11_C3_OSTEOSARCOMA_EXALLC | Osteosarcoma (controls excluding all cancers) || id:finngen_R11_C3_OSTEOSARCOMA_EXALLC | CD20 on IgD+ CD24- B cell || id:ebi-a-GCST90001747 | Inverse variance weighted | 0.811947 | 3 | 0.846607 |
| ebi-a-GCST90001748 | finngen_R11_C3_OSTEOSARCOMA_EXALLC | Osteosarcoma (controls excluding all cancers) || id:finngen_R11_C3_OSTEOSARCOMA_EXALLC | CD20 on IgD+ CD38- B cell || id:ebi-a-GCST90001748 | MR Egger | 0.259745 | 2 | 0.878207 |
| ebi-a-GCST90001748 | finngen_R11_C3_OSTEOSARCOMA_EXALLC | Osteosarcoma (controls excluding all cancers) || id:finngen_R11_C3_OSTEOSARCOMA_EXALLC | CD20 on IgD+ CD38- B cell || id:ebi-a-GCST90001748 | Inverse variance weighted | 1.175997 | 3 | 0.758767 |
| ebi-a-GCST90001751 | finngen_R11_C3_OSTEOSARCOMA_EXALLC | Osteosarcoma (controls excluding all cancers) || id:finngen_R11_C3_OSTEOSARCOMA_EXALLC | CD20 on IgD+ CD38+ B cell || id:ebi-a-GCST90001751 | MR Egger | 1.827021 | 3 | 0.609073 |
| ebi-a-GCST90001751 | finngen_R11_C3_OSTEOSARCOMA_EXALLC | Osteosarcoma (controls excluding all cancers) || id:finngen_R11_C3_OSTEOSARCOMA_EXALLC | CD20 on IgD+ CD38+ B cell || id:ebi-a-GCST90001751 | Inverse variance weighted | 2.257567 | 4 | 0.688505 |
| ebi-a-GCST90001752 | finngen_R11_C3_OSTEOSARCOMA_EXALLC | Osteosarcoma (controls excluding all cancers) || id:finngen_R11_C3_OSTEOSARCOMA_EXALLC | CD20 on IgD+ CD38dim B cell || id:ebi-a-GCST90001752 | MR Egger | 0.814837 | 5 | 0.976077 |
| ebi-a-GCST90001752 | finngen_R11_C3_OSTEOSARCOMA_EXALLC | Osteosarcoma (controls excluding all cancers) || id:finngen_R11_C3_OSTEOSARCOMA_EXALLC | CD20 on IgD+ CD38dim B cell || id:ebi-a-GCST90001752 | Inverse variance weighted | 1.143827 | 6 | 0.979568 |
| ebi-a-GCST90001753 | finngen_R11_C3_OSTEOSARCOMA_EXALLC | Osteosarcoma (controls excluding all cancers) || id:finngen_R11_C3_OSTEOSARCOMA_EXALLC | CD20 on IgD- CD24- B cell || id:ebi-a-GCST90001753 | Inverse variance weighted | 3.398097 | 1 | 0.065272 |
| ebi-a-GCST90001754 | finngen_R11_C3_OSTEOSARCOMA_EXALLC | Osteosarcoma (controls excluding all cancers) || id:finngen_R11_C3_OSTEOSARCOMA_EXALLC | CD20 on IgD- CD27- B cell || id:ebi-a-GCST90001754 | MR Egger | 2.292084 | 2 | 0.317892 |
| ebi-a-GCST90001754 | finngen_R11_C3_OSTEOSARCOMA_EXALLC | Osteosarcoma (controls excluding all cancers) || id:finngen_R11_C3_OSTEOSARCOMA_EXALLC | CD20 on IgD- CD27- B cell || id:ebi-a-GCST90001754 | Inverse variance weighted | 3.154877 | 3 | 0.368357 |
| ebi-a-GCST90001755 | finngen_R11_C3_OSTEOSARCOMA_EXALLC | Osteosarcoma (controls excluding all cancers) || id:finngen_R11_C3_OSTEOSARCOMA_EXALLC | CD20 on IgD- CD38- B cell || id:ebi-a-GCST90001755 | MR Egger | 0.410561 | 2 | 0.814419 |
| ebi-a-GCST90001755 | finngen_R11_C3_OSTEOSARCOMA_EXALLC | Osteosarcoma (controls excluding all cancers) || id:finngen_R11_C3_OSTEOSARCOMA_EXALLC | CD20 on IgD- CD38- B cell || id:ebi-a-GCST90001755 | Inverse variance weighted | 7.723055 | 3 | 0.052096 |
| ebi-a-GCST90001757 | finngen_R11_C3_OSTEOSARCOMA_EXALLC | Osteosarcoma (controls excluding all cancers) || id:finngen_R11_C3_OSTEOSARCOMA_EXALLC | CD20 on IgD- CD38dim B cell || id:ebi-a-GCST90001757 | MR Egger | 6.356059 | 5 | 0.273098 |
| ebi-a-GCST90001757 | finngen_R11_C3_OSTEOSARCOMA_EXALLC | Osteosarcoma (controls excluding all cancers) || id:finngen_R11_C3_OSTEOSARCOMA_EXALLC | CD20 on IgD- CD38dim B cell || id:ebi-a-GCST90001757 | Inverse variance weighted | 8.103337 | 6 | 0.23063 |
| ebi-a-GCST90001758 | finngen_R11_C3_OSTEOSARCOMA_EXALLC | Osteosarcoma (controls excluding all cancers) || id:finngen_R11_C3_OSTEOSARCOMA_EXALLC | CD20 on memory B cell || id:ebi-a-GCST90001758 | MR Egger | 0.377271 | 3 | 0.944897 |
| ebi-a-GCST90001758 | finngen_R11_C3_OSTEOSARCOMA_EXALLC | Osteosarcoma (controls excluding all cancers) || id:finngen_R11_C3_OSTEOSARCOMA_EXALLC | CD20 on memory B cell || id:ebi-a-GCST90001758 | Inverse variance weighted | 1.871989 | 4 | 0.759289 |
| ebi-a-GCST90001759 | finngen_R11_C3_OSTEOSARCOMA_EXALLC | Osteosarcoma (controls excluding all cancers) || id:finngen_R11_C3_OSTEOSARCOMA_EXALLC | CD20 on naive-mature B cell || id:ebi-a-GCST90001759 | MR Egger | 3.33344 | 4 | 0.503652 |
| ebi-a-GCST90001759 | finngen_R11_C3_OSTEOSARCOMA_EXALLC | Osteosarcoma (controls excluding all cancers) || id:finngen_R11_C3_OSTEOSARCOMA_EXALLC | CD20 on naive-mature B cell || id:ebi-a-GCST90001759 | Inverse variance weighted | 3.545307 | 5 | 0.616543 |
| ebi-a-GCST90001760 | finngen_R11_C3_OSTEOSARCOMA_EXALLC | Osteosarcoma (controls excluding all cancers) || id:finngen_R11_C3_OSTEOSARCOMA_EXALLC | CD20 on unswitched memory B cell || id:ebi-a-GCST90001760 | MR Egger | 1.313438 | 2 | 0.51855 |
| ebi-a-GCST90001760 | finngen_R11_C3_OSTEOSARCOMA_EXALLC | Osteosarcoma (controls excluding all cancers) || id:finngen_R11_C3_OSTEOSARCOMA_EXALLC | CD20 on unswitched memory B cell || id:ebi-a-GCST90001760 | Inverse variance weighted | 3.076244 | 3 | 0.380019 |
| ebi-a-GCST90001761 | finngen_R11_C3_OSTEOSARCOMA_EXALLC | Osteosarcoma (controls excluding all cancers) || id:finngen_R11_C3_OSTEOSARCOMA_EXALLC | CD20 on switched memory B cell || id:ebi-a-GCST90001761 | MR Egger | 6.808429 | 5 | 0.235282 |
| ebi-a-GCST90001761 | finngen_R11_C3_OSTEOSARCOMA_EXALLC | Osteosarcoma (controls excluding all cancers) || id:finngen_R11_C3_OSTEOSARCOMA_EXALLC | CD20 on switched memory B cell || id:ebi-a-GCST90001761 | Inverse variance weighted | 10.21199 | 6 | 0.116004 |
| ebi-a-GCST90001762 | finngen_R11_C3_OSTEOSARCOMA_EXALLC | Osteosarcoma (controls excluding all cancers) || id:finngen_R11_C3_OSTEOSARCOMA_EXALLC | CD20 on IgD+ B cell || id:ebi-a-GCST90001762 | MR Egger | 3.378841 | 3 | 0.336819 |
| ebi-a-GCST90001762 | finngen_R11_C3_OSTEOSARCOMA_EXALLC | Osteosarcoma (controls excluding all cancers) || id:finngen_R11_C3_OSTEOSARCOMA_EXALLC | CD20 on IgD+ B cell || id:ebi-a-GCST90001762 | Inverse variance weighted | 3.488365 | 4 | 0.47965 |
| ebi-a-GCST90001763 | finngen_R11_C3_OSTEOSARCOMA_EXALLC | Osteosarcoma (controls excluding all cancers) || id:finngen_R11_C3_OSTEOSARCOMA_EXALLC | CD20 on transitional B cell || id:ebi-a-GCST90001763 | Inverse variance weighted | 0.601207 | 1 | 0.438118 |
| ebi-a-GCST90001765 | finngen_R11_C3_OSTEOSARCOMA_EXALLC | Osteosarcoma (controls excluding all cancers) || id:finngen_R11_C3_OSTEOSARCOMA_EXALLC | CD24 on IgD+ CD24+ B cell || id:ebi-a-GCST90001765 | Inverse variance weighted | 0.709082 | 1 | 0.399749 |
| ebi-a-GCST90001766 | finngen_R11_C3_OSTEOSARCOMA_EXALLC | Osteosarcoma (controls excluding all cancers) || id:finngen_R11_C3_OSTEOSARCOMA_EXALLC | CD24 on IgD+ CD38- B cell || id:ebi-a-GCST90001766 | Inverse variance weighted | 0.626784 | 1 | 0.428537 |
| ebi-a-GCST90001767 | finngen_R11_C3_OSTEOSARCOMA_EXALLC | Osteosarcoma (controls excluding all cancers) || id:finngen_R11_C3_OSTEOSARCOMA_EXALLC | CD24 on IgD+ CD38- unswitched memory B cell || id:ebi-a-GCST90001767 | Inverse variance weighted | 0.685213 | 1 | 0.407797 |
| ebi-a-GCST90001768 | finngen_R11_C3_OSTEOSARCOMA_EXALLC | Osteosarcoma (controls excluding all cancers) || id:finngen_R11_C3_OSTEOSARCOMA_EXALLC | CD24 on IgD+ CD38+ B cell || id:ebi-a-GCST90001768 | Inverse variance weighted | 1.205466 | 1 | 0.272232 |
| ebi-a-GCST90001769 | finngen_R11_C3_OSTEOSARCOMA_EXALLC | Osteosarcoma (controls excluding all cancers) || id:finngen_R11_C3_OSTEOSARCOMA_EXALLC | CD24 on IgD- CD38- B cell || id:ebi-a-GCST90001769 | Inverse variance weighted | 0.612766 | 1 | 0.433748 |
| ebi-a-GCST90001771 | finngen_R11_C3_OSTEOSARCOMA_EXALLC | Osteosarcoma (controls excluding all cancers) || id:finngen_R11_C3_OSTEOSARCOMA_EXALLC | CD24 on memory B cell || id:ebi-a-GCST90001771 | Inverse variance weighted | 0.304591 | 1 | 0.581019 |
| ebi-a-GCST90001772 | finngen_R11_C3_OSTEOSARCOMA_EXALLC | Osteosarcoma (controls excluding all cancers) || id:finngen_R11_C3_OSTEOSARCOMA_EXALLC | CD24 on unswitched memory B cell || id:ebi-a-GCST90001772 | Inverse variance weighted | 0.698448 | 1 | 0.403306 |
| ebi-a-GCST90001773 | finngen_R11_C3_OSTEOSARCOMA_EXALLC | Osteosarcoma (controls excluding all cancers) || id:finngen_R11_C3_OSTEOSARCOMA_EXALLC | CD24 on switched memory B cell || id:ebi-a-GCST90001773 | Inverse variance weighted | 0.309759 | 1 | 0.577828 |
| ebi-a-GCST90001775 | finngen_R11_C3_OSTEOSARCOMA_EXALLC | Osteosarcoma (controls excluding all cancers) || id:finngen_R11_C3_OSTEOSARCOMA_EXALLC | CD25 on B cell || id:ebi-a-GCST90001775 | MR Egger | 1.489025 | 1 | 0.222368 |
| ebi-a-GCST90001775 | finngen_R11_C3_OSTEOSARCOMA_EXALLC | Osteosarcoma (controls excluding all cancers) || id:finngen_R11_C3_OSTEOSARCOMA_EXALLC | CD25 on B cell || id:ebi-a-GCST90001775 | Inverse variance weighted | 1.779527 | 2 | 0.410753 |
| ebi-a-GCST90001777 | finngen_R11_C3_OSTEOSARCOMA_EXALLC | Osteosarcoma (controls excluding all cancers) || id:finngen_R11_C3_OSTEOSARCOMA_EXALLC | CD25 on CD24+ CD27+ B cell || id:ebi-a-GCST90001777 | MR Egger | 0.537518 | 2 | 0.764327 |
| ebi-a-GCST90001777 | finngen_R11_C3_OSTEOSARCOMA_EXALLC | Osteosarcoma (controls excluding all cancers) || id:finngen_R11_C3_OSTEOSARCOMA_EXALLC | CD25 on CD24+ CD27+ B cell || id:ebi-a-GCST90001777 | Inverse variance weighted | 1.639674 | 3 | 0.650428 |
| ebi-a-GCST90001778 | finngen_R11_C3_OSTEOSARCOMA_EXALLC | Osteosarcoma (controls excluding all cancers) || id:finngen_R11_C3_OSTEOSARCOMA_EXALLC | CD25 on IgD+ CD24+ B cell || id:ebi-a-GCST90001778 | MR Egger | 0.443368 | 1 | 0.505501 |
| ebi-a-GCST90001778 | finngen_R11_C3_OSTEOSARCOMA_EXALLC | Osteosarcoma (controls excluding all cancers) || id:finngen_R11_C3_OSTEOSARCOMA_EXALLC | CD25 on IgD+ CD24+ B cell || id:ebi-a-GCST90001778 | Inverse variance weighted | 1.307133 | 2 | 0.520187 |
| ebi-a-GCST90001779 | finngen_R11_C3_OSTEOSARCOMA_EXALLC | Osteosarcoma (controls excluding all cancers) || id:finngen_R11_C3_OSTEOSARCOMA_EXALLC | CD25 on IgD+ CD24- B cell || id:ebi-a-GCST90001779 | MR Egger | 0.485559 | 1 | 0.485915 |
| ebi-a-GCST90001779 | finngen_R11_C3_OSTEOSARCOMA_EXALLC | Osteosarcoma (controls excluding all cancers) || id:finngen_R11_C3_OSTEOSARCOMA_EXALLC | CD25 on IgD+ CD24- B cell || id:ebi-a-GCST90001779 | Inverse variance weighted | 0.950074 | 2 | 0.621862 |
| ebi-a-GCST90001780 | finngen_R11_C3_OSTEOSARCOMA_EXALLC | Osteosarcoma (controls excluding all cancers) || id:finngen_R11_C3_OSTEOSARCOMA_EXALLC | CD25 on IgD+ CD38- B cell || id:ebi-a-GCST90001780 | MR Egger | 0.059333 | 1 | 0.807552 |
| ebi-a-GCST90001780 | finngen_R11_C3_OSTEOSARCOMA_EXALLC | Osteosarcoma (controls excluding all cancers) || id:finngen_R11_C3_OSTEOSARCOMA_EXALLC | CD25 on IgD+ CD38- B cell || id:ebi-a-GCST90001780 | Inverse variance weighted | 1.492376 | 2 | 0.474171 |
| ebi-a-GCST90001781 | finngen_R11_C3_OSTEOSARCOMA_EXALLC | Osteosarcoma (controls excluding all cancers) || id:finngen_R11_C3_OSTEOSARCOMA_EXALLC | CD25 on IgD+ CD38- naive B cell || id:ebi-a-GCST90001781 | MR Egger | 0.18333 | 1 | 0.668527 |
| ebi-a-GCST90001781 | finngen_R11_C3_OSTEOSARCOMA_EXALLC | Osteosarcoma (controls excluding all cancers) || id:finngen_R11_C3_OSTEOSARCOMA_EXALLC | CD25 on IgD+ CD38- naive B cell || id:ebi-a-GCST90001781 | Inverse variance weighted | 1.282505 | 2 | 0.526632 |
| ebi-a-GCST90001783 | finngen_R11_C3_OSTEOSARCOMA_EXALLC | Osteosarcoma (controls excluding all cancers) || id:finngen_R11_C3_OSTEOSARCOMA_EXALLC | CD25 on IgD+ CD38+ B cell || id:ebi-a-GCST90001783 | MR Egger | 0.100145 | 1 | 0.751655 |
| ebi-a-GCST90001783 | finngen_R11_C3_OSTEOSARCOMA_EXALLC | Osteosarcoma (controls excluding all cancers) || id:finngen_R11_C3_OSTEOSARCOMA_EXALLC | CD25 on IgD+ CD38+ B cell || id:ebi-a-GCST90001783 | Inverse variance weighted | 1.390555 | 2 | 0.498936 |
| ebi-a-GCST90001784 | finngen_R11_C3_OSTEOSARCOMA_EXALLC | Osteosarcoma (controls excluding all cancers) || id:finngen_R11_C3_OSTEOSARCOMA_EXALLC | CD25 on IgD+ CD38dim B cell || id:ebi-a-GCST90001784 | Inverse variance weighted | 0.00095 | 1 | 0.975408 |
| ebi-a-GCST90001785 | finngen_R11_C3_OSTEOSARCOMA_EXALLC | Osteosarcoma (controls excluding all cancers) || id:finngen_R11_C3_OSTEOSARCOMA_EXALLC | CD25 on IgD- CD24- B cell || id:ebi-a-GCST90001785 | Inverse variance weighted | 1.017102 | 1 | 0.313208 |
| ebi-a-GCST90001786 | finngen_R11_C3_OSTEOSARCOMA_EXALLC | Osteosarcoma (controls excluding all cancers) || id:finngen_R11_C3_OSTEOSARCOMA_EXALLC | CD25 on IgD- CD27- B cell || id:ebi-a-GCST90001786 | Inverse variance weighted | 1.231005 | 1 | 0.267212 |
| ebi-a-GCST90001787 | finngen_R11_C3_OSTEOSARCOMA_EXALLC | Osteosarcoma (controls excluding all cancers) || id:finngen_R11_C3_OSTEOSARCOMA_EXALLC | CD25 on IgD- CD38- B cell || id:ebi-a-GCST90001787 | MR Egger | 0.327614 | 1 | 0.567068 |
| ebi-a-GCST90001787 | finngen_R11_C3_OSTEOSARCOMA_EXALLC | Osteosarcoma (controls excluding all cancers) || id:finngen_R11_C3_OSTEOSARCOMA_EXALLC | CD25 on IgD- CD38- B cell || id:ebi-a-GCST90001787 | Inverse variance weighted | 0.624419 | 2 | 0.731828 |
| ebi-a-GCST90001789 | finngen_R11_C3_OSTEOSARCOMA_EXALLC | Osteosarcoma (controls excluding all cancers) || id:finngen_R11_C3_OSTEOSARCOMA_EXALLC | CD25 on IgD- CD38dim B cell || id:ebi-a-GCST90001789 | MR Egger | 0.007777 | 1 | 0.929729 |
| ebi-a-GCST90001789 | finngen_R11_C3_OSTEOSARCOMA_EXALLC | Osteosarcoma (controls excluding all cancers) || id:finngen_R11_C3_OSTEOSARCOMA_EXALLC | CD25 on IgD- CD38dim B cell || id:ebi-a-GCST90001789 | Inverse variance weighted | 1.397721 | 2 | 0.497152 |
| ebi-a-GCST90001790 | finngen_R11_C3_OSTEOSARCOMA_EXALLC | Osteosarcoma (controls excluding all cancers) || id:finngen_R11_C3_OSTEOSARCOMA_EXALLC | CD25 on memory B cell || id:ebi-a-GCST90001790 | MR Egger | 0.433487 | 2 | 0.805136 |
| ebi-a-GCST90001790 | finngen_R11_C3_OSTEOSARCOMA_EXALLC | Osteosarcoma (controls excluding all cancers) || id:finngen_R11_C3_OSTEOSARCOMA_EXALLC | CD25 on memory B cell || id:ebi-a-GCST90001790 | Inverse variance weighted | 1.615649 | 3 | 0.655847 |
| ebi-a-GCST90001791 | finngen_R11_C3_OSTEOSARCOMA_EXALLC | Osteosarcoma (controls excluding all cancers) || id:finngen_R11_C3_OSTEOSARCOMA_EXALLC | CD25 on naive-mature B cell || id:ebi-a-GCST90001791 | MR Egger | 1.39734 | 2 | 0.497246 |
| ebi-a-GCST90001791 | finngen_R11_C3_OSTEOSARCOMA_EXALLC | Osteosarcoma (controls excluding all cancers) || id:finngen_R11_C3_OSTEOSARCOMA_EXALLC | CD25 on naive-mature B cell || id:ebi-a-GCST90001791 | Inverse variance weighted | 1.75709 | 3 | 0.624317 |
| ebi-a-GCST90001792 | finngen_R11_C3_OSTEOSARCOMA_EXALLC | Osteosarcoma (controls excluding all cancers) || id:finngen_R11_C3_OSTEOSARCOMA_EXALLC | CD25 on unswitched memory B cell || id:ebi-a-GCST90001792 | MR Egger | 0.524747 | 2 | 0.769224 |
| ebi-a-GCST90001792 | finngen_R11_C3_OSTEOSARCOMA_EXALLC | Osteosarcoma (controls excluding all cancers) || id:finngen_R11_C3_OSTEOSARCOMA_EXALLC | CD25 on unswitched memory B cell || id:ebi-a-GCST90001792 | Inverse variance weighted | 1.635665 | 3 | 0.65133 |
| ebi-a-GCST90001793 | finngen_R11_C3_OSTEOSARCOMA_EXALLC | Osteosarcoma (controls excluding all cancers) || id:finngen_R11_C3_OSTEOSARCOMA_EXALLC | CD25 on switched memory B cell || id:ebi-a-GCST90001793 | MR Egger | 0.022359 | 1 | 0.881135 |
| ebi-a-GCST90001793 | finngen_R11_C3_OSTEOSARCOMA_EXALLC | Osteosarcoma (controls excluding all cancers) || id:finngen_R11_C3_OSTEOSARCOMA_EXALLC | CD25 on switched memory B cell || id:ebi-a-GCST90001793 | Inverse variance weighted | 2.792945 | 2 | 0.247468 |
| ebi-a-GCST90001794 | finngen_R11_C3_OSTEOSARCOMA_EXALLC | Osteosarcoma (controls excluding all cancers) || id:finngen_R11_C3_OSTEOSARCOMA_EXALLC | CD25 on IgD+ B cell || id:ebi-a-GCST90001794 | Inverse variance weighted | 1.521083 | 1 | 0.217456 |
| ebi-a-GCST90001795 | finngen_R11_C3_OSTEOSARCOMA_EXALLC | Osteosarcoma (controls excluding all cancers) || id:finngen_R11_C3_OSTEOSARCOMA_EXALLC | CD25 on transitional B cell || id:ebi-a-GCST90001795 | Inverse variance weighted | 0.76007 | 1 | 0.383307 |
| ebi-a-GCST90001798 | finngen_R11_C3_OSTEOSARCOMA_EXALLC | Osteosarcoma (controls excluding all cancers) || id:finngen_R11_C3_OSTEOSARCOMA_EXALLC | CD27 on CD24+ CD27+ B cell || id:ebi-a-GCST90001798 | MR Egger | 5.258157 | 8 | 0.729661 |
| ebi-a-GCST90001798 | finngen_R11_C3_OSTEOSARCOMA_EXALLC | Osteosarcoma (controls excluding all cancers) || id:finngen_R11_C3_OSTEOSARCOMA_EXALLC | CD27 on CD24+ CD27+ B cell || id:ebi-a-GCST90001798 | Inverse variance weighted | 6.223279 | 9 | 0.71738 |
| ebi-a-GCST90001800 | finngen_R11_C3_OSTEOSARCOMA_EXALLC | Osteosarcoma (controls excluding all cancers) || id:finngen_R11_C3_OSTEOSARCOMA_EXALLC | CD27 on IgD+ CD24+ B cell || id:ebi-a-GCST90001800 | MR Egger | 4.577596 | 4 | 0.333445 |
| ebi-a-GCST90001800 | finngen_R11_C3_OSTEOSARCOMA_EXALLC | Osteosarcoma (controls excluding all cancers) || id:finngen_R11_C3_OSTEOSARCOMA_EXALLC | CD27 on IgD+ CD24+ B cell || id:ebi-a-GCST90001800 | Inverse variance weighted | 5.09641 | 5 | 0.404228 |
| ebi-a-GCST90001801 | finngen_R11_C3_OSTEOSARCOMA_EXALLC | Osteosarcoma (controls excluding all cancers) || id:finngen_R11_C3_OSTEOSARCOMA_EXALLC | CD27 on IgD+ CD38- unswitched memory B cell || id:ebi-a-GCST90001801 | MR Egger | 1.453204 | 3 | 0.693112 |
| ebi-a-GCST90001801 | finngen_R11_C3_OSTEOSARCOMA_EXALLC | Osteosarcoma (controls excluding all cancers) || id:finngen_R11_C3_OSTEOSARCOMA_EXALLC | CD27 on IgD+ CD38- unswitched memory B cell || id:ebi-a-GCST90001801 | Inverse variance weighted | 1.96023 | 4 | 0.743074 |
| ebi-a-GCST90001802 | finngen_R11_C3_OSTEOSARCOMA_EXALLC | Osteosarcoma (controls excluding all cancers) || id:finngen_R11_C3_OSTEOSARCOMA_EXALLC | CD27 on IgD- CD38- B cell || id:ebi-a-GCST90001802 | MR Egger | 3.181975 | 5 | 0.671954 |
| ebi-a-GCST90001802 | finngen_R11_C3_OSTEOSARCOMA_EXALLC | Osteosarcoma (controls excluding all cancers) || id:finngen_R11_C3_OSTEOSARCOMA_EXALLC | CD27 on IgD- CD38- B cell || id:ebi-a-GCST90001802 | Inverse variance weighted | 3.18853 | 6 | 0.784839 |
| ebi-a-GCST90001803 | finngen_R11_C3_OSTEOSARCOMA_EXALLC | Osteosarcoma (controls excluding all cancers) || id:finngen_R11_C3_OSTEOSARCOMA_EXALLC | CD27 on IgD- CD38+ B cell || id:ebi-a-GCST90001803 | Inverse variance weighted | 0.155612 | 1 | 0.693229 |
| ebi-a-GCST90001804 | finngen_R11_C3_OSTEOSARCOMA_EXALLC | Osteosarcoma (controls excluding all cancers) || id:finngen_R11_C3_OSTEOSARCOMA_EXALLC | CD27 on IgD- CD38dim B cell || id:ebi-a-GCST90001804 | MR Egger | 2.042605 | 5 | 0.843219 |
| ebi-a-GCST90001804 | finngen_R11_C3_OSTEOSARCOMA_EXALLC | Osteosarcoma (controls excluding all cancers) || id:finngen_R11_C3_OSTEOSARCOMA_EXALLC | CD27 on IgD- CD38dim B cell || id:ebi-a-GCST90001804 | Inverse variance weighted | 2.537393 | 6 | 0.86426 |
| ebi-a-GCST90001805 | finngen_R11_C3_OSTEOSARCOMA_EXALLC | Osteosarcoma (controls excluding all cancers) || id:finngen_R11_C3_OSTEOSARCOMA_EXALLC | CD27 on memory B cell || id:ebi-a-GCST90001805 | MR Egger | 3.885552 | 5 | 0.566009 |
| ebi-a-GCST90001805 | finngen_R11_C3_OSTEOSARCOMA_EXALLC | Osteosarcoma (controls excluding all cancers) || id:finngen_R11_C3_OSTEOSARCOMA_EXALLC | CD27 on memory B cell || id:ebi-a-GCST90001805 | Inverse variance weighted | 4.818669 | 6 | 0.567272 |
| ebi-a-GCST90001806 | finngen_R11_C3_OSTEOSARCOMA_EXALLC | Osteosarcoma (controls excluding all cancers) || id:finngen_R11_C3_OSTEOSARCOMA_EXALLC | CD27 on unswitched memory B cell || id:ebi-a-GCST90001806 | MR Egger | 7.139342 | 9 | 0.622614 |
| ebi-a-GCST90001806 | finngen_R11_C3_OSTEOSARCOMA_EXALLC | Osteosarcoma (controls excluding all cancers) || id:finngen_R11_C3_OSTEOSARCOMA_EXALLC | CD27 on unswitched memory B cell || id:ebi-a-GCST90001806 | Inverse variance weighted | 7.422044 | 10 | 0.68509 |
| ebi-a-GCST90001808 | finngen_R11_C3_OSTEOSARCOMA_EXALLC | Osteosarcoma (controls excluding all cancers) || id:finngen_R11_C3_OSTEOSARCOMA_EXALLC | CD27 on switched memory B cell || id:ebi-a-GCST90001808 | MR Egger | 3.836038 | 8 | 0.871605 |
| ebi-a-GCST90001808 | finngen_R11_C3_OSTEOSARCOMA_EXALLC | Osteosarcoma (controls excluding all cancers) || id:finngen_R11_C3_OSTEOSARCOMA_EXALLC | CD27 on switched memory B cell || id:ebi-a-GCST90001808 | Inverse variance weighted | 4.264223 | 9 | 0.893177 |
| ebi-a-GCST90001811 | finngen_R11_C3_OSTEOSARCOMA_EXALLC | Osteosarcoma (controls excluding all cancers) || id:finngen_R11_C3_OSTEOSARCOMA_EXALLC | CD38 on IgD+ CD24- B cell || id:ebi-a-GCST90001811 | Inverse variance weighted | 0.019148 | 1 | 0.889943 |
| ebi-a-GCST90001812 | finngen_R11_C3_OSTEOSARCOMA_EXALLC | Osteosarcoma (controls excluding all cancers) || id:finngen_R11_C3_OSTEOSARCOMA_EXALLC | CD38 on IgD+ CD38+ B cell || id:ebi-a-GCST90001812 | MR Egger | 0.385014 | 1 | 0.534932 |
| ebi-a-GCST90001812 | finngen_R11_C3_OSTEOSARCOMA_EXALLC | Osteosarcoma (controls excluding all cancers) || id:finngen_R11_C3_OSTEOSARCOMA_EXALLC | CD38 on IgD+ CD38+ B cell || id:ebi-a-GCST90001812 | Inverse variance weighted | 3.636938 | 2 | 0.162274 |
| ebi-a-GCST90001813 | finngen_R11_C3_OSTEOSARCOMA_EXALLC | Osteosarcoma (controls excluding all cancers) || id:finngen_R11_C3_OSTEOSARCOMA_EXALLC | CD38 on IgD+ CD38dim B cell || id:ebi-a-GCST90001813 | MR Egger | 0.11705 | 2 | 0.943155 |
| ebi-a-GCST90001813 | finngen_R11_C3_OSTEOSARCOMA_EXALLC | Osteosarcoma (controls excluding all cancers) || id:finngen_R11_C3_OSTEOSARCOMA_EXALLC | CD38 on IgD+ CD38dim B cell || id:ebi-a-GCST90001813 | Inverse variance weighted | 5.650853 | 3 | 0.129889 |
| ebi-a-GCST90001815 | finngen_R11_C3_OSTEOSARCOMA_EXALLC | Osteosarcoma (controls excluding all cancers) || id:finngen_R11_C3_OSTEOSARCOMA_EXALLC | CD38 on IgD- CD38dim B cell || id:ebi-a-GCST90001815 | MR Egger | 0.006628 | 1 | 0.935113 |
| ebi-a-GCST90001815 | finngen_R11_C3_OSTEOSARCOMA_EXALLC | Osteosarcoma (controls excluding all cancers) || id:finngen_R11_C3_OSTEOSARCOMA_EXALLC | CD38 on IgD- CD38dim B cell || id:ebi-a-GCST90001815 | Inverse variance weighted | 3.697379 | 2 | 0.157443 |
| ebi-a-GCST90001816 | finngen_R11_C3_OSTEOSARCOMA_EXALLC | Osteosarcoma (controls excluding all cancers) || id:finngen_R11_C3_OSTEOSARCOMA_EXALLC | CD38 on naive-mature B cell || id:ebi-a-GCST90001816 | MR Egger | 0.017244 | 1 | 0.895524 |
| ebi-a-GCST90001816 | finngen_R11_C3_OSTEOSARCOMA_EXALLC | Osteosarcoma (controls excluding all cancers) || id:finngen_R11_C3_OSTEOSARCOMA_EXALLC | CD38 on naive-mature B cell || id:ebi-a-GCST90001816 | Inverse variance weighted | 3.696106 | 2 | 0.157544 |
| ebi-a-GCST90001819 | finngen_R11_C3_OSTEOSARCOMA_EXALLC | Osteosarcoma (controls excluding all cancers) || id:finngen_R11_C3_OSTEOSARCOMA_EXALLC | CD38 on transitional B cell || id:ebi-a-GCST90001819 | MR Egger | 4.401178 | 3 | 0.221276 |
| ebi-a-GCST90001819 | finngen_R11_C3_OSTEOSARCOMA_EXALLC | Osteosarcoma (controls excluding all cancers) || id:finngen_R11_C3_OSTEOSARCOMA_EXALLC | CD38 on transitional B cell || id:ebi-a-GCST90001819 | Inverse variance weighted | 6.259605 | 4 | 0.180582 |
| ebi-a-GCST90001820 | finngen_R11_C3_OSTEOSARCOMA_EXALLC | Osteosarcoma (controls excluding all cancers) || id:finngen_R11_C3_OSTEOSARCOMA_EXALLC | IgD on IgD+ CD24+ B cell || id:ebi-a-GCST90001820 | MR Egger | 8.868393 | 4 | 0.064475 |
| ebi-a-GCST90001820 | finngen_R11_C3_OSTEOSARCOMA_EXALLC | Osteosarcoma (controls excluding all cancers) || id:finngen_R11_C3_OSTEOSARCOMA_EXALLC | IgD on IgD+ CD24+ B cell || id:ebi-a-GCST90001820 | Inverse variance weighted | 8.869863 | 5 | 0.114369 |
| ebi-a-GCST90001821 | finngen_R11_C3_OSTEOSARCOMA_EXALLC | Osteosarcoma (controls excluding all cancers) || id:finngen_R11_C3_OSTEOSARCOMA_EXALLC | IgD on IgD+ CD24- B cell || id:ebi-a-GCST90001821 | MR Egger | 2.710283 | 3 | 0.438483 |
| ebi-a-GCST90001821 | finngen_R11_C3_OSTEOSARCOMA_EXALLC | Osteosarcoma (controls excluding all cancers) || id:finngen_R11_C3_OSTEOSARCOMA_EXALLC | IgD on IgD+ CD24- B cell || id:ebi-a-GCST90001821 | Inverse variance weighted | 3.138507 | 4 | 0.53492 |
| ebi-a-GCST90001823 | finngen_R11_C3_OSTEOSARCOMA_EXALLC | Osteosarcoma (controls excluding all cancers) || id:finngen_R11_C3_OSTEOSARCOMA_EXALLC | IgD on IgD+ CD38- unswitched memory B cell || id:ebi-a-GCST90001823 | Inverse variance weighted | 0.473035 | 1 | 0.491594 |
| ebi-a-GCST90001824 | finngen_R11_C3_OSTEOSARCOMA_EXALLC | Osteosarcoma (controls excluding all cancers) || id:finngen_R11_C3_OSTEOSARCOMA_EXALLC | IgD on IgD+ CD38+ B cell || id:ebi-a-GCST90001824 | MR Egger | 2.16963 | 4 | 0.704593 |
| ebi-a-GCST90001824 | finngen_R11_C3_OSTEOSARCOMA_EXALLC | Osteosarcoma (controls excluding all cancers) || id:finngen_R11_C3_OSTEOSARCOMA_EXALLC | IgD on IgD+ CD38+ B cell || id:ebi-a-GCST90001824 | Inverse variance weighted | 4.623275 | 5 | 0.463561 |
| ebi-a-GCST90001825 | finngen_R11_C3_OSTEOSARCOMA_EXALLC | Osteosarcoma (controls excluding all cancers) || id:finngen_R11_C3_OSTEOSARCOMA_EXALLC | IgD on IgD+ CD38dim B cell || id:ebi-a-GCST90001825 | MR Egger | 2.74719 | 3 | 0.432267 |
| ebi-a-GCST90001825 | finngen_R11_C3_OSTEOSARCOMA_EXALLC | Osteosarcoma (controls excluding all cancers) || id:finngen_R11_C3_OSTEOSARCOMA_EXALLC | IgD on IgD+ CD38dim B cell || id:ebi-a-GCST90001825 | Inverse variance weighted | 3.143904 | 4 | 0.534039 |
| ebi-a-GCST90001826 | finngen_R11_C3_OSTEOSARCOMA_EXALLC | Osteosarcoma (controls excluding all cancers) || id:finngen_R11_C3_OSTEOSARCOMA_EXALLC | IgD on unswitched memory B cell || id:ebi-a-GCST90001826 | MR Egger | 7.169675 | 3 | 0.066682 |
| ebi-a-GCST90001826 | finngen_R11_C3_OSTEOSARCOMA_EXALLC | Osteosarcoma (controls excluding all cancers) || id:finngen_R11_C3_OSTEOSARCOMA_EXALLC | IgD on unswitched memory B cell || id:ebi-a-GCST90001826 | Inverse variance weighted | 7.535303 | 4 | 0.110163 |
| ebi-a-GCST90001827 | finngen_R11_C3_OSTEOSARCOMA_EXALLC | Osteosarcoma (controls excluding all cancers) || id:finngen_R11_C3_OSTEOSARCOMA_EXALLC | IgD on IgD+ B cell || id:ebi-a-GCST90001827 | Inverse variance weighted | 1.885154 | 1 | 0.169749 |
| ebi-a-GCST90001828 | finngen_R11_C3_OSTEOSARCOMA_EXALLC | Osteosarcoma (controls excluding all cancers) || id:finngen_R11_C3_OSTEOSARCOMA_EXALLC | IgD on transitional B cell || id:ebi-a-GCST90001828 | MR Egger | 1.792551 | 3 | 0.616557 |
| ebi-a-GCST90001828 | finngen_R11_C3_OSTEOSARCOMA_EXALLC | Osteosarcoma (controls excluding all cancers) || id:finngen_R11_C3_OSTEOSARCOMA_EXALLC | IgD on transitional B cell || id:ebi-a-GCST90001828 | Inverse variance weighted | 2.638313 | 4 | 0.620051 |
| ebi-a-GCST90001829 | finngen_R11_C3_OSTEOSARCOMA_EXALLC | Osteosarcoma (controls excluding all cancers) || id:finngen_R11_C3_OSTEOSARCOMA_EXALLC | BAFF-R on B cell || id:ebi-a-GCST90001829 | MR Egger | 10.26549 | 8 | 0.246884 |
| ebi-a-GCST90001829 | finngen_R11_C3_OSTEOSARCOMA_EXALLC | Osteosarcoma (controls excluding all cancers) || id:finngen_R11_C3_OSTEOSARCOMA_EXALLC | BAFF-R on B cell || id:ebi-a-GCST90001829 | Inverse variance weighted | 10.85192 | 9 | 0.285996 |
| ebi-a-GCST90001832 | finngen_R11_C3_OSTEOSARCOMA_EXALLC | Osteosarcoma (controls excluding all cancers) || id:finngen_R11_C3_OSTEOSARCOMA_EXALLC | CD62L on CD62L+ plasmacytoid Dendritic Cell || id:ebi-a-GCST90001832 | MR Egger | 0.089823 | 1 | 0.764402 |
| ebi-a-GCST90001832 | finngen_R11_C3_OSTEOSARCOMA_EXALLC | Osteosarcoma (controls excluding all cancers) || id:finngen_R11_C3_OSTEOSARCOMA_EXALLC | CD62L on CD62L+ plasmacytoid Dendritic Cell || id:ebi-a-GCST90001832 | Inverse variance weighted | 0.164665 | 2 | 0.920966 |
| ebi-a-GCST90001833 | finngen_R11_C3_OSTEOSARCOMA_EXALLC | Osteosarcoma (controls excluding all cancers) || id:finngen_R11_C3_OSTEOSARCOMA_EXALLC | CD62L on CD62L+ Dendritic Cell || id:ebi-a-GCST90001833 | Inverse variance weighted | 5.107336 | 1 | 0.023825 |
| ebi-a-GCST90001834 | finngen_R11_C3_OSTEOSARCOMA_EXALLC | Osteosarcoma (controls excluding all cancers) || id:finngen_R11_C3_OSTEOSARCOMA_EXALLC | CD62L on monocyte || id:ebi-a-GCST90001834 | Inverse variance weighted | 1.593637 | 1 | 0.206807 |
| ebi-a-GCST90001838 | finngen_R11_C3_OSTEOSARCOMA_EXALLC | Osteosarcoma (controls excluding all cancers) || id:finngen_R11_C3_OSTEOSARCOMA_EXALLC | CD3 on naive CD8+ T cell || id:ebi-a-GCST90001838 | MR Egger | 7.622043 | 4 | 0.106447 |
| ebi-a-GCST90001838 | finngen_R11_C3_OSTEOSARCOMA_EXALLC | Osteosarcoma (controls excluding all cancers) || id:finngen_R11_C3_OSTEOSARCOMA_EXALLC | CD3 on naive CD8+ T cell || id:ebi-a-GCST90001838 | Inverse variance weighted | 8.018266 | 5 | 0.155232 |
| ebi-a-GCST90001839 | finngen_R11_C3_OSTEOSARCOMA_EXALLC | Osteosarcoma (controls excluding all cancers) || id:finngen_R11_C3_OSTEOSARCOMA_EXALLC | CD3 on Effector Memory CD8+ T cell || id:ebi-a-GCST90001839 | MR Egger | 0.033518 | 1 | 0.854736 |
| ebi-a-GCST90001839 | finngen_R11_C3_OSTEOSARCOMA_EXALLC | Osteosarcoma (controls excluding all cancers) || id:finngen_R11_C3_OSTEOSARCOMA_EXALLC | CD3 on Effector Memory CD8+ T cell || id:ebi-a-GCST90001839 | Inverse variance weighted | 0.226165 | 2 | 0.893077 |
| ebi-a-GCST90001840 | finngen_R11_C3_OSTEOSARCOMA_EXALLC | Osteosarcoma (controls excluding all cancers) || id:finngen_R11_C3_OSTEOSARCOMA_EXALLC | CD3 on Terminally Differentiated CD8+ T cell || id:ebi-a-GCST90001840 | Inverse variance weighted | 2.475711 | 1 | 0.115617 |
| ebi-a-GCST90001841 | finngen_R11_C3_OSTEOSARCOMA_EXALLC | Osteosarcoma (controls excluding all cancers) || id:finngen_R11_C3_OSTEOSARCOMA_EXALLC | CD3 on Central Memory CD4+ T cell || id:ebi-a-GCST90001841 | MR Egger | 2.838466 | 2 | 0.241899 |
| ebi-a-GCST90001841 | finngen_R11_C3_OSTEOSARCOMA_EXALLC | Osteosarcoma (controls excluding all cancers) || id:finngen_R11_C3_OSTEOSARCOMA_EXALLC | CD3 on Central Memory CD4+ T cell || id:ebi-a-GCST90001841 | Inverse variance weighted | 3.45853 | 3 | 0.326181 |
| ebi-a-GCST90001842 | finngen_R11_C3_OSTEOSARCOMA_EXALLC | Osteosarcoma (controls excluding all cancers) || id:finngen_R11_C3_OSTEOSARCOMA_EXALLC | CD3 on Naive CD4+ T cell || id:ebi-a-GCST90001842 | MR Egger | 2.649537 | 2 | 0.265865 |
| ebi-a-GCST90001842 | finngen_R11_C3_OSTEOSARCOMA_EXALLC | Osteosarcoma (controls excluding all cancers) || id:finngen_R11_C3_OSTEOSARCOMA_EXALLC | CD3 on Naive CD4+ T cell || id:ebi-a-GCST90001842 | Inverse variance weighted | 3.437704 | 3 | 0.328932 |
| ebi-a-GCST90001843 | finngen_R11_C3_OSTEOSARCOMA_EXALLC | Osteosarcoma (controls excluding all cancers) || id:finngen_R11_C3_OSTEOSARCOMA_EXALLC | CD3 on Effector Memory CD4+ T cell || id:ebi-a-GCST90001843 | Inverse variance weighted | 0.078314 | 1 | 0.779595 |
| ebi-a-GCST90001845 | finngen_R11_C3_OSTEOSARCOMA_EXALLC | Osteosarcoma (controls excluding all cancers) || id:finngen_R11_C3_OSTEOSARCOMA_EXALLC | CD3 on CD45RA- CD4+ T cell || id:ebi-a-GCST90001845 | MR Egger | 0.158027 | 1 | 0.69098 |
| ebi-a-GCST90001845 | finngen_R11_C3_OSTEOSARCOMA_EXALLC | Osteosarcoma (controls excluding all cancers) || id:finngen_R11_C3_OSTEOSARCOMA_EXALLC | CD3 on CD45RA- CD4+ T cell || id:ebi-a-GCST90001845 | Inverse variance weighted | 3.331449 | 2 | 0.189054 |
| ebi-a-GCST90001846 | finngen_R11_C3_OSTEOSARCOMA_EXALLC | Osteosarcoma (controls excluding all cancers) || id:finngen_R11_C3_OSTEOSARCOMA_EXALLC | CD3 on Central Memory CD8+ T cell || id:ebi-a-GCST90001846 | MR Egger | 0.944599 | 1 | 0.331098 |
| ebi-a-GCST90001846 | finngen_R11_C3_OSTEOSARCOMA_EXALLC | Osteosarcoma (controls excluding all cancers) || id:finngen_R11_C3_OSTEOSARCOMA_EXALLC | CD3 on Central Memory CD8+ T cell || id:ebi-a-GCST90001846 | Inverse variance weighted | 8.731507 | 2 | 0.012705 |
| ebi-a-GCST90001847 | finngen_R11_C3_OSTEOSARCOMA_EXALLC | Osteosarcoma (controls excluding all cancers) || id:finngen_R11_C3_OSTEOSARCOMA_EXALLC | CD3 on HLA DR+ T cell || id:ebi-a-GCST90001847 | Inverse variance weighted | 0.01018 | 1 | 0.919631 |
| ebi-a-GCST90001848 | finngen_R11_C3_OSTEOSARCOMA_EXALLC | Osteosarcoma (controls excluding all cancers) || id:finngen_R11_C3_OSTEOSARCOMA_EXALLC | CD3 on Natural Killer T || id:ebi-a-GCST90001848 | Inverse variance weighted | 0.354781 | 1 | 0.551419 |
| ebi-a-GCST90001849 | finngen_R11_C3_OSTEOSARCOMA_EXALLC | Osteosarcoma (controls excluding all cancers) || id:finngen_R11_C3_OSTEOSARCOMA_EXALLC | CD3 on HLA DR+ CD4+ T cell || id:ebi-a-GCST90001849 | Inverse variance weighted | 1.783034 | 1 | 0.181777 |
| ebi-a-GCST90001851 | finngen_R11_C3_OSTEOSARCOMA_EXALLC | Osteosarcoma (controls excluding all cancers) || id:finngen_R11_C3_OSTEOSARCOMA_EXALLC | CD3 on T cell || id:ebi-a-GCST90001851 | MR Egger | 0.997156 | 1 | 0.318 |
| ebi-a-GCST90001851 | finngen_R11_C3_OSTEOSARCOMA_EXALLC | Osteosarcoma (controls excluding all cancers) || id:finngen_R11_C3_OSTEOSARCOMA_EXALLC | CD3 on T cell || id:ebi-a-GCST90001851 | Inverse variance weighted | 1.0749 | 2 | 0.584236 |
| ebi-a-GCST90001853 | finngen_R11_C3_OSTEOSARCOMA_EXALLC | Osteosarcoma (controls excluding all cancers) || id:finngen_R11_C3_OSTEOSARCOMA_EXALLC | CD3 on activated CD4 regulatory T cell || id:ebi-a-GCST90001853 | MR Egger | 5.513494 | 2 | 0.063498 |
| ebi-a-GCST90001853 | finngen_R11_C3_OSTEOSARCOMA_EXALLC | Osteosarcoma (controls excluding all cancers) || id:finngen_R11_C3_OSTEOSARCOMA_EXALLC | CD3 on activated CD4 regulatory T cell || id:ebi-a-GCST90001853 | Inverse variance weighted | 5.803683 | 3 | 0.121562 |
| ebi-a-GCST90001854 | finngen_R11_C3_OSTEOSARCOMA_EXALLC | Osteosarcoma (controls excluding all cancers) || id:finngen_R11_C3_OSTEOSARCOMA_EXALLC | CD3 on CD39+ activated CD4 regulatory T cell || id:ebi-a-GCST90001854 | MR Egger | 5.482288 | 3 | 0.139702 |
| ebi-a-GCST90001854 | finngen_R11_C3_OSTEOSARCOMA_EXALLC | Osteosarcoma (controls excluding all cancers) || id:finngen_R11_C3_OSTEOSARCOMA_EXALLC | CD3 on CD39+ activated CD4 regulatory T cell || id:ebi-a-GCST90001854 | Inverse variance weighted | 6.165859 | 4 | 0.187099 |
| ebi-a-GCST90001855 | finngen_R11_C3_OSTEOSARCOMA_EXALLC | Osteosarcoma (controls excluding all cancers) || id:finngen_R11_C3_OSTEOSARCOMA_EXALLC | CD3 on secreting CD4 regulatory T cell || id:ebi-a-GCST90001855 | MR Egger | 1.02527 | 1 | 0.311272 |
| ebi-a-GCST90001855 | finngen_R11_C3_OSTEOSARCOMA_EXALLC | Osteosarcoma (controls excluding all cancers) || id:finngen_R11_C3_OSTEOSARCOMA_EXALLC | CD3 on secreting CD4 regulatory T cell || id:ebi-a-GCST90001855 | Inverse variance weighted | 3.012529 | 2 | 0.221737 |
| ebi-a-GCST90001856 | finngen_R11_C3_OSTEOSARCOMA_EXALLC | Osteosarcoma (controls excluding all cancers) || id:finngen_R11_C3_OSTEOSARCOMA_EXALLC | CD3 on CD39+ secreting CD4 regulatory T cell || id:ebi-a-GCST90001856 | MR Egger | 0.232753 | 1 | 0.62949 |
| ebi-a-GCST90001856 | finngen_R11_C3_OSTEOSARCOMA_EXALLC | Osteosarcoma (controls excluding all cancers) || id:finngen_R11_C3_OSTEOSARCOMA_EXALLC | CD3 on CD39+ secreting CD4 regulatory T cell || id:ebi-a-GCST90001856 | Inverse variance weighted | 2.798819 | 2 | 0.246743 |
| ebi-a-GCST90001857 | finngen_R11_C3_OSTEOSARCOMA_EXALLC | Osteosarcoma (controls excluding all cancers) || id:finngen_R11_C3_OSTEOSARCOMA_EXALLC | CD3 on activated & secreting CD4 regulatory T cell || id:ebi-a-GCST90001857 | MR Egger | 5.25105 | 2 | 0.072402 |
| ebi-a-GCST90001857 | finngen_R11_C3_OSTEOSARCOMA_EXALLC | Osteosarcoma (controls excluding all cancers) || id:finngen_R11_C3_OSTEOSARCOMA_EXALLC | CD3 on activated & secreting CD4 regulatory T cell || id:ebi-a-GCST90001857 | Inverse variance weighted | 5.726542 | 3 | 0.1257 |
| ebi-a-GCST90001858 | finngen_R11_C3_OSTEOSARCOMA_EXALLC | Osteosarcoma (controls excluding all cancers) || id:finngen_R11_C3_OSTEOSARCOMA_EXALLC | CD3 on CD45RA+ CD4+ T cell || id:ebi-a-GCST90001858 | MR Egger | 4.860835 | 3 | 0.182276 |
| ebi-a-GCST90001858 | finngen_R11_C3_OSTEOSARCOMA_EXALLC | Osteosarcoma (controls excluding all cancers) || id:finngen_R11_C3_OSTEOSARCOMA_EXALLC | CD3 on CD45RA+ CD4+ T cell || id:ebi-a-GCST90001858 | Inverse variance weighted | 4.984112 | 4 | 0.288932 |
| ebi-a-GCST90001859 | finngen_R11_C3_OSTEOSARCOMA_EXALLC | Osteosarcoma (controls excluding all cancers) || id:finngen_R11_C3_OSTEOSARCOMA_EXALLC | CD3 on CD8+ T cell || id:ebi-a-GCST90001859 | Inverse variance weighted | 5.930207 | 1 | 0.014883 |
| ebi-a-GCST90001860 | finngen_R11_C3_OSTEOSARCOMA_EXALLC | Osteosarcoma (controls excluding all cancers) || id:finngen_R11_C3_OSTEOSARCOMA_EXALLC | CD3 on CD39+ CD4+ T cell || id:ebi-a-GCST90001860 | MR Egger | 4.174318 | 2 | 0.124039 |
| ebi-a-GCST90001860 | finngen_R11_C3_OSTEOSARCOMA_EXALLC | Osteosarcoma (controls excluding all cancers) || id:finngen_R11_C3_OSTEOSARCOMA_EXALLC | CD3 on CD39+ CD4+ T cell || id:ebi-a-GCST90001860 | Inverse variance weighted | 4.950892 | 3 | 0.175429 |
| ebi-a-GCST90001861 | finngen_R11_C3_OSTEOSARCOMA_EXALLC | Osteosarcoma (controls excluding all cancers) || id:finngen_R11_C3_OSTEOSARCOMA_EXALLC | CD3 on CD28+ CD4+ T cell || id:ebi-a-GCST90001861 | Inverse variance weighted | 1.075399 | 1 | 0.299729 |
| ebi-a-GCST90001863 | finngen_R11_C3_OSTEOSARCOMA_EXALLC | Osteosarcoma (controls excluding all cancers) || id:finngen_R11_C3_OSTEOSARCOMA_EXALLC | CD3 on CD28+ CD45RA- CD8+ T cell || id:ebi-a-GCST90001863 | MR Egger | 1.767841 | 3 | 0.621958 |
| ebi-a-GCST90001863 | finngen_R11_C3_OSTEOSARCOMA_EXALLC | Osteosarcoma (controls excluding all cancers) || id:finngen_R11_C3_OSTEOSARCOMA_EXALLC | CD3 on CD28+ CD45RA- CD8+ T cell || id:ebi-a-GCST90001863 | Inverse variance weighted | 6.535371 | 4 | 0.162575 |
| ebi-a-GCST90001864 | finngen_R11_C3_OSTEOSARCOMA_EXALLC | Osteosarcoma (controls excluding all cancers) || id:finngen_R11_C3_OSTEOSARCOMA_EXALLC | CD3 on CD28+ CD45RA+ CD8+ T cell || id:ebi-a-GCST90001864 | MR Egger | 0.765625 | 1 | 0.381574 |
| ebi-a-GCST90001864 | finngen_R11_C3_OSTEOSARCOMA_EXALLC | Osteosarcoma (controls excluding all cancers) || id:finngen_R11_C3_OSTEOSARCOMA_EXALLC | CD3 on CD28+ CD45RA+ CD8+ T cell || id:ebi-a-GCST90001864 | Inverse variance weighted | 0.898321 | 2 | 0.638164 |
| ebi-a-GCST90001865 | finngen_R11_C3_OSTEOSARCOMA_EXALLC | Osteosarcoma (controls excluding all cancers) || id:finngen_R11_C3_OSTEOSARCOMA_EXALLC | CD3 on CD28- CD8+ T cell || id:ebi-a-GCST90001865 | Inverse variance weighted | 2.531218 | 1 | 0.111614 |
| ebi-a-GCST90001867 | finngen_R11_C3_OSTEOSARCOMA_EXALLC | Osteosarcoma (controls excluding all cancers) || id:finngen_R11_C3_OSTEOSARCOMA_EXALLC | CD3 on CD4+ T cell || id:ebi-a-GCST90001867 | Inverse variance weighted | 0.161105 | 1 | 0.688141 |
| ebi-a-GCST90001868 | finngen_R11_C3_OSTEOSARCOMA_EXALLC | Osteosarcoma (controls excluding all cancers) || id:finngen_R11_C3_OSTEOSARCOMA_EXALLC | CD3 on CD4 regulatory T cell || id:ebi-a-GCST90001868 | MR Egger | 0.822064 | 1 | 0.364577 |
| ebi-a-GCST90001868 | finngen_R11_C3_OSTEOSARCOMA_EXALLC | Osteosarcoma (controls excluding all cancers) || id:finngen_R11_C3_OSTEOSARCOMA_EXALLC | CD3 on CD4 regulatory T cell || id:ebi-a-GCST90001868 | Inverse variance weighted | 3.002692 | 2 | 0.22283 |
| ebi-a-GCST90001869 | finngen_R11_C3_OSTEOSARCOMA_EXALLC | Osteosarcoma (controls excluding all cancers) || id:finngen_R11_C3_OSTEOSARCOMA_EXALLC | CD3 on resting CD4 regulatory T cell || id:ebi-a-GCST90001869 | MR Egger | 0.730581 | 3 | 0.865988 |
| ebi-a-GCST90001869 | finngen_R11_C3_OSTEOSARCOMA_EXALLC | Osteosarcoma (controls excluding all cancers) || id:finngen_R11_C3_OSTEOSARCOMA_EXALLC | CD3 on resting CD4 regulatory T cell || id:ebi-a-GCST90001869 | Inverse variance weighted | 1.957583 | 4 | 0.74356 |
| ebi-a-GCST90001870 | finngen_R11_C3_OSTEOSARCOMA_EXALLC | Osteosarcoma (controls excluding all cancers) || id:finngen_R11_C3_OSTEOSARCOMA_EXALLC | CD34 on Hematopoietic Stem Cell || id:ebi-a-GCST90001870 | MR Egger | 3.920564 | 2 | 0.140819 |
| ebi-a-GCST90001870 | finngen_R11_C3_OSTEOSARCOMA_EXALLC | Osteosarcoma (controls excluding all cancers) || id:finngen_R11_C3_OSTEOSARCOMA_EXALLC | CD34 on Hematopoietic Stem Cell || id:ebi-a-GCST90001870 | Inverse variance weighted | 4.20411 | 3 | 0.240251 |
| ebi-a-GCST90001872 | finngen_R11_C3_OSTEOSARCOMA_EXALLC | Osteosarcoma (controls excluding all cancers) || id:finngen_R11_C3_OSTEOSARCOMA_EXALLC | HVEM on naive CD8+ T cell || id:ebi-a-GCST90001872 | Inverse variance weighted | 0.691935 | 1 | 0.405507 |
| ebi-a-GCST90001883 | finngen_R11_C3_OSTEOSARCOMA_EXALLC | Osteosarcoma (controls excluding all cancers) || id:finngen_R11_C3_OSTEOSARCOMA_EXALLC | CD16-CD56 on Natural Killer T || id:ebi-a-GCST90001883 | MR Egger | 2.444859 | 2 | 0.294514 |
| ebi-a-GCST90001883 | finngen_R11_C3_OSTEOSARCOMA_EXALLC | Osteosarcoma (controls excluding all cancers) || id:finngen_R11_C3_OSTEOSARCOMA_EXALLC | CD16-CD56 on Natural Killer T || id:ebi-a-GCST90001883 | Inverse variance weighted | 3.044271 | 3 | 0.38485 |
| ebi-a-GCST90001884 | finngen_R11_C3_OSTEOSARCOMA_EXALLC | Osteosarcoma (controls excluding all cancers) || id:finngen_R11_C3_OSTEOSARCOMA_EXALLC | CD16-CD56 on Natural Killer || id:ebi-a-GCST90001884 | MR Egger | 3.879413 | 6 | 0.692991 |
| ebi-a-GCST90001884 | finngen_R11_C3_OSTEOSARCOMA_EXALLC | Osteosarcoma (controls excluding all cancers) || id:finngen_R11_C3_OSTEOSARCOMA_EXALLC | CD16-CD56 on Natural Killer || id:ebi-a-GCST90001884 | Inverse variance weighted | 8.879939 | 7 | 0.261391 |
| ebi-a-GCST90001885 | finngen_R11_C3_OSTEOSARCOMA_EXALLC | Osteosarcoma (controls excluding all cancers) || id:finngen_R11_C3_OSTEOSARCOMA_EXALLC | CD16-CD56 on HLA DR+ Natural Killer || id:ebi-a-GCST90001885 | Inverse variance weighted | 0.073758 | 1 | 0.785942 |
| ebi-a-GCST90001886 | finngen_R11_C3_OSTEOSARCOMA_EXALLC | Osteosarcoma (controls excluding all cancers) || id:finngen_R11_C3_OSTEOSARCOMA_EXALLC | CD28 on CD39+ activated CD4 regulatory T cell || id:ebi-a-GCST90001886 | Inverse variance weighted | 0.664846 | 1 | 0.414854 |
| ebi-a-GCST90001887 | finngen_R11_C3_OSTEOSARCOMA_EXALLC | Osteosarcoma (controls excluding all cancers) || id:finngen_R11_C3_OSTEOSARCOMA_EXALLC | CD28 on secreting CD4 regulatory T cell || id:ebi-a-GCST90001887 | MR Egger | 0.025647 | 1 | 0.872765 |
| ebi-a-GCST90001887 | finngen_R11_C3_OSTEOSARCOMA_EXALLC | Osteosarcoma (controls excluding all cancers) || id:finngen_R11_C3_OSTEOSARCOMA_EXALLC | CD28 on secreting CD4 regulatory T cell || id:ebi-a-GCST90001887 | Inverse variance weighted | 0.284829 | 2 | 0.867262 |
| ebi-a-GCST90001888 | finngen_R11_C3_OSTEOSARCOMA_EXALLC | Osteosarcoma (controls excluding all cancers) || id:finngen_R11_C3_OSTEOSARCOMA_EXALLC | CD28 on CD39+ secreting CD4 regulatory T cell || id:ebi-a-GCST90001888 | Inverse variance weighted | 0.838897 | 1 | 0.359712 |
| ebi-a-GCST90001890 | finngen_R11_C3_OSTEOSARCOMA_EXALLC | Osteosarcoma (controls excluding all cancers) || id:finngen_R11_C3_OSTEOSARCOMA_EXALLC | CD28 on CD45RA+ CD4+ T cell || id:ebi-a-GCST90001890 | Inverse variance weighted | 0.931475 | 1 | 0.33448 |
| ebi-a-GCST90001891 | finngen_R11_C3_OSTEOSARCOMA_EXALLC | Osteosarcoma (controls excluding all cancers) || id:finngen_R11_C3_OSTEOSARCOMA_EXALLC | CD28 on CD45RA- CD4 not regulatory T cell || id:ebi-a-GCST90001891 | MR Egger | 0.794064 | 1 | 0.372874 |
| ebi-a-GCST90001891 | finngen_R11_C3_OSTEOSARCOMA_EXALLC | Osteosarcoma (controls excluding all cancers) || id:finngen_R11_C3_OSTEOSARCOMA_EXALLC | CD28 on CD45RA- CD4 not regulatory T cell || id:ebi-a-GCST90001891 | Inverse variance weighted | 4.113489 | 2 | 0.12787 |
| ebi-a-GCST90001892 | finngen_R11_C3_OSTEOSARCOMA_EXALLC | Osteosarcoma (controls excluding all cancers) || id:finngen_R11_C3_OSTEOSARCOMA_EXALLC | CD28 on CD39+ CD4+ T cell || id:ebi-a-GCST90001892 | MR Egger | 1.492521 | 4 | 0.827965 |
| ebi-a-GCST90001892 | finngen_R11_C3_OSTEOSARCOMA_EXALLC | Osteosarcoma (controls excluding all cancers) || id:finngen_R11_C3_OSTEOSARCOMA_EXALLC | CD28 on CD39+ CD4+ T cell || id:ebi-a-GCST90001892 | Inverse variance weighted | 1.555079 | 5 | 0.906627 |
| ebi-a-GCST90001894 | finngen_R11_C3_OSTEOSARCOMA_EXALLC | Osteosarcoma (controls excluding all cancers) || id:finngen_R11_C3_OSTEOSARCOMA_EXALLC | CD28 on CD28+ CD4+ T cell || id:ebi-a-GCST90001894 | Inverse variance weighted | 0.062727 | 1 | 0.802236 |
| ebi-a-GCST90001896 | finngen_R11_C3_OSTEOSARCOMA_EXALLC | Osteosarcoma (controls excluding all cancers) || id:finngen_R11_C3_OSTEOSARCOMA_EXALLC | CD28 on CD28+ CD45RA+ CD8+ T cell || id:ebi-a-GCST90001896 | MR Egger | 2.01558 | 1 | 0.155692 |
| ebi-a-GCST90001896 | finngen_R11_C3_OSTEOSARCOMA_EXALLC | Osteosarcoma (controls excluding all cancers) || id:finngen_R11_C3_OSTEOSARCOMA_EXALLC | CD28 on CD28+ CD45RA+ CD8+ T cell || id:ebi-a-GCST90001896 | Inverse variance weighted | 4.923613 | 2 | 0.085281 |
| ebi-a-GCST90001897 | finngen_R11_C3_OSTEOSARCOMA_EXALLC | Osteosarcoma (controls excluding all cancers) || id:finngen_R11_C3_OSTEOSARCOMA_EXALLC | CD28 on CD39+ CD8+ T cell || id:ebi-a-GCST90001897 | Inverse variance weighted | 0.020366 | 1 | 0.886521 |
| ebi-a-GCST90001898 | finngen_R11_C3_OSTEOSARCOMA_EXALLC | Osteosarcoma (controls excluding all cancers) || id:finngen_R11_C3_OSTEOSARCOMA_EXALLC | CD28 on CD4+ T cell || id:ebi-a-GCST90001898 | Inverse variance weighted | 0.068507 | 1 | 0.793523 |
| ebi-a-GCST90001901 | finngen_R11_C3_OSTEOSARCOMA_EXALLC | Osteosarcoma (controls excluding all cancers) || id:finngen_R11_C3_OSTEOSARCOMA_EXALLC | CD28 on CD39+ resting CD4 regulatory T cell || id:ebi-a-GCST90001901 | Inverse variance weighted | 0.057977 | 1 | 0.809722 |
| ebi-a-GCST90001906 | finngen_R11_C3_OSTEOSARCOMA_EXALLC | Osteosarcoma (controls excluding all cancers) || id:finngen_R11_C3_OSTEOSARCOMA_EXALLC | CD86 on granulocyte || id:ebi-a-GCST90001906 | Inverse variance weighted | 0.03493 | 1 | 0.851742 |
| ebi-a-GCST90001907 | finngen_R11_C3_OSTEOSARCOMA_EXALLC | Osteosarcoma (controls excluding all cancers) || id:finngen_R11_C3_OSTEOSARCOMA_EXALLC | CCR7 on naive CD4+ T cell || id:ebi-a-GCST90001907 | MR Egger | 0.776189 | 2 | 0.678348 |
| ebi-a-GCST90001907 | finngen_R11_C3_OSTEOSARCOMA_EXALLC | Osteosarcoma (controls excluding all cancers) || id:finngen_R11_C3_OSTEOSARCOMA_EXALLC | CCR7 on naive CD4+ T cell || id:ebi-a-GCST90001907 | Inverse variance weighted | 2.439688 | 3 | 0.48629 |
| ebi-a-GCST90001908 | finngen_R11_C3_OSTEOSARCOMA_EXALLC | Osteosarcoma (controls excluding all cancers) || id:finngen_R11_C3_OSTEOSARCOMA_EXALLC | CCR7 on naive CD8+ T cell || id:ebi-a-GCST90001908 | Inverse variance weighted | 1.922318 | 1 | 0.165601 |
| ebi-a-GCST90001910 | finngen_R11_C3_OSTEOSARCOMA_EXALLC | Osteosarcoma (controls excluding all cancers) || id:finngen_R11_C3_OSTEOSARCOMA_EXALLC | CD45 on B cell || id:ebi-a-GCST90001910 | Inverse variance weighted | 0.145055 | 1 | 0.703307 |
| ebi-a-GCST90001911 | finngen_R11_C3_OSTEOSARCOMA_EXALLC | Osteosarcoma (controls excluding all cancers) || id:finngen_R11_C3_OSTEOSARCOMA_EXALLC | CD45 on Natural Killer || id:ebi-a-GCST90001911 | Inverse variance weighted | 5.36011 | 1 | 0.020602 |
| ebi-a-GCST90001917 | finngen_R11_C3_OSTEOSARCOMA_EXALLC | Osteosarcoma (controls excluding all cancers) || id:finngen_R11_C3_OSTEOSARCOMA_EXALLC | CD45 on CD8+ T cell || id:ebi-a-GCST90001917 | Inverse variance weighted | 0.50423 | 1 | 0.477648 |
| ebi-a-GCST90001920 | finngen_R11_C3_OSTEOSARCOMA_EXALLC | Osteosarcoma (controls excluding all cancers) || id:finngen_R11_C3_OSTEOSARCOMA_EXALLC | CD45 on HLA DR+ CD4+ T cell || id:ebi-a-GCST90001920 | Inverse variance weighted | 0.152173 | 1 | 0.696467 |
| ebi-a-GCST90001924 | finngen_R11_C3_OSTEOSARCOMA_EXALLC | Osteosarcoma (controls excluding all cancers) || id:finngen_R11_C3_OSTEOSARCOMA_EXALLC | CD127 on CD28+ CD4+ T cell || id:ebi-a-GCST90001924 | MR Egger | 0.015413 | 1 | 0.901197 |
| ebi-a-GCST90001924 | finngen_R11_C3_OSTEOSARCOMA_EXALLC | Osteosarcoma (controls excluding all cancers) || id:finngen_R11_C3_OSTEOSARCOMA_EXALLC | CD127 on CD28+ CD4+ T cell || id:ebi-a-GCST90001924 | Inverse variance weighted | 1.656348 | 2 | 0.436846 |
| ebi-a-GCST90001926 | finngen_R11_C3_OSTEOSARCOMA_EXALLC | Osteosarcoma (controls excluding all cancers) || id:finngen_R11_C3_OSTEOSARCOMA_EXALLC | CD127 on granulocyte || id:ebi-a-GCST90001926 | MR Egger | 6.652805 | 6 | 0.354152 |
| ebi-a-GCST90001926 | finngen_R11_C3_OSTEOSARCOMA_EXALLC | Osteosarcoma (controls excluding all cancers) || id:finngen_R11_C3_OSTEOSARCOMA_EXALLC | CD127 on granulocyte || id:ebi-a-GCST90001926 | Inverse variance weighted | 7.956057 | 7 | 0.336485 |
| ebi-a-GCST90001929 | finngen_R11_C3_OSTEOSARCOMA_EXALLC | Osteosarcoma (controls excluding all cancers) || id:finngen_R11_C3_OSTEOSARCOMA_EXALLC | CD127 on CD28+ CD45RA+ CD8+ T cell || id:ebi-a-GCST90001929 | Inverse variance weighted | 2.244465 | 1 | 0.134093 |
| ebi-a-GCST90001932 | finngen_R11_C3_OSTEOSARCOMA_EXALLC | Osteosarcoma (controls excluding all cancers) || id:finngen_R11_C3_OSTEOSARCOMA_EXALLC | CD127 on CD45RA+ CD4+ T cell || id:ebi-a-GCST90001932 | MR Egger | 0.246038 | 2 | 0.884247 |
| ebi-a-GCST90001932 | finngen_R11_C3_OSTEOSARCOMA_EXALLC | Osteosarcoma (controls excluding all cancers) || id:finngen_R11_C3_OSTEOSARCOMA_EXALLC | CD127 on CD45RA+ CD4+ T cell || id:ebi-a-GCST90001932 | Inverse variance weighted | 2.245249 | 3 | 0.523091 |
| ebi-a-GCST90001933 | finngen_R11_C3_OSTEOSARCOMA_EXALLC | Osteosarcoma (controls excluding all cancers) || id:finngen_R11_C3_OSTEOSARCOMA_EXALLC | CD25 on CD45RA- CD4 not regulatory T cell || id:ebi-a-GCST90001933 | Inverse variance weighted | 0.838432 | 1 | 0.359846 |
| ebi-a-GCST90001941 | finngen_R11_C3_OSTEOSARCOMA_EXALLC | Osteosarcoma (controls excluding all cancers) || id:finngen_R11_C3_OSTEOSARCOMA_EXALLC | CD25 on secreting CD4 regulatory T cell || id:ebi-a-GCST90001941 | Inverse variance weighted | 1.349122 | 1 | 0.245432 |
| ebi-a-GCST90001942 | finngen_R11_C3_OSTEOSARCOMA_EXALLC | Osteosarcoma (controls excluding all cancers) || id:finngen_R11_C3_OSTEOSARCOMA_EXALLC | CD25 on CD39+ secreting CD4 regulatory T cell || id:ebi-a-GCST90001942 | Inverse variance weighted | 1.201241 | 1 | 0.273074 |
| ebi-a-GCST90001944 | finngen_R11_C3_OSTEOSARCOMA_EXALLC | Osteosarcoma (controls excluding all cancers) || id:finngen_R11_C3_OSTEOSARCOMA_EXALLC | CD123 on plasmacytoid Dendritic Cell || id:ebi-a-GCST90001944 | Inverse variance weighted | 0.008359 | 1 | 0.927151 |
| ebi-a-GCST90001945 | finngen_R11_C3_OSTEOSARCOMA_EXALLC | Osteosarcoma (controls excluding all cancers) || id:finngen_R11_C3_OSTEOSARCOMA_EXALLC | CD123 on CD62L+ plasmacytoid Dendritic Cell || id:ebi-a-GCST90001945 | Inverse variance weighted | 0.008476 | 1 | 0.926647 |
| ebi-a-GCST90001946 | finngen_R11_C3_OSTEOSARCOMA_EXALLC | Osteosarcoma (controls excluding all cancers) || id:finngen_R11_C3_OSTEOSARCOMA_EXALLC | CD33 on CD14+ monocyte || id:ebi-a-GCST90001946 | MR Egger | 1.481317 | 3 | 0.686589 |
| ebi-a-GCST90001946 | finngen_R11_C3_OSTEOSARCOMA_EXALLC | Osteosarcoma (controls excluding all cancers) || id:finngen_R11_C3_OSTEOSARCOMA_EXALLC | CD33 on CD14+ monocyte || id:ebi-a-GCST90001946 | Inverse variance weighted | 10.35785 | 4 | 0.034812 |
| ebi-a-GCST90001947 | finngen_R11_C3_OSTEOSARCOMA_EXALLC | Osteosarcoma (controls excluding all cancers) || id:finngen_R11_C3_OSTEOSARCOMA_EXALLC | CD33 on CD33+ HLA DR+ CD14dim || id:ebi-a-GCST90001947 | MR Egger | 2.917974 | 2 | 0.232472 |
| ebi-a-GCST90001947 | finngen_R11_C3_OSTEOSARCOMA_EXALLC | Osteosarcoma (controls excluding all cancers) || id:finngen_R11_C3_OSTEOSARCOMA_EXALLC | CD33 on CD33+ HLA DR+ CD14dim || id:ebi-a-GCST90001947 | Inverse variance weighted | 7.972388 | 3 | 0.046586 |
| ebi-a-GCST90001948 | finngen_R11_C3_OSTEOSARCOMA_EXALLC | Osteosarcoma (controls excluding all cancers) || id:finngen_R11_C3_OSTEOSARCOMA_EXALLC | CD33 on CD33dim HLA DR+ CD11b+ || id:ebi-a-GCST90001948 | MR Egger | 8.732491 | 4 | 0.068145 |
| ebi-a-GCST90001948 | finngen_R11_C3_OSTEOSARCOMA_EXALLC | Osteosarcoma (controls excluding all cancers) || id:finngen_R11_C3_OSTEOSARCOMA_EXALLC | CD33 on CD33dim HLA DR+ CD11b+ || id:ebi-a-GCST90001948 | Inverse variance weighted | 12.01103 | 5 | 0.034637 |
| ebi-a-GCST90001949 | finngen_R11_C3_OSTEOSARCOMA_EXALLC | Osteosarcoma (controls excluding all cancers) || id:finngen_R11_C3_OSTEOSARCOMA_EXALLC | CD33 on CD33dim HLA DR+ CD11b- || id:ebi-a-GCST90001949 | MR Egger | 10.19556 | 5 | 0.06988 |
| ebi-a-GCST90001949 | finngen_R11_C3_OSTEOSARCOMA_EXALLC | Osteosarcoma (controls excluding all cancers) || id:finngen_R11_C3_OSTEOSARCOMA_EXALLC | CD33 on CD33dim HLA DR+ CD11b- || id:ebi-a-GCST90001949 | Inverse variance weighted | 12.86781 | 6 | 0.045184 |
| ebi-a-GCST90001950 | finngen_R11_C3_OSTEOSARCOMA_EXALLC | Osteosarcoma (controls excluding all cancers) || id:finngen_R11_C3_OSTEOSARCOMA_EXALLC | CD33 on Granulocytic Myeloid-Derived Suppressor Cells || id:ebi-a-GCST90001950 | MR Egger | 0.025035 | 1 | 0.874279 |
| ebi-a-GCST90001950 | finngen_R11_C3_OSTEOSARCOMA_EXALLC | Osteosarcoma (controls excluding all cancers) || id:finngen_R11_C3_OSTEOSARCOMA_EXALLC | CD33 on Granulocytic Myeloid-Derived Suppressor Cells || id:ebi-a-GCST90001950 | Inverse variance weighted | 7.210064 | 2 | 0.027187 |
| ebi-a-GCST90001951 | finngen_R11_C3_OSTEOSARCOMA_EXALLC | Osteosarcoma (controls excluding all cancers) || id:finngen_R11_C3_OSTEOSARCOMA_EXALLC | CD33 on CD66b++ myeloid cell || id:ebi-a-GCST90001951 | MR Egger | 1.01879 | 2 | 0.600859 |
| ebi-a-GCST90001951 | finngen_R11_C3_OSTEOSARCOMA_EXALLC | Osteosarcoma (controls excluding all cancers) || id:finngen_R11_C3_OSTEOSARCOMA_EXALLC | CD33 on CD66b++ myeloid cell || id:ebi-a-GCST90001951 | Inverse variance weighted | 7.821902 | 3 | 0.049839 |
| ebi-a-GCST90001952 | finngen_R11_C3_OSTEOSARCOMA_EXALLC | Osteosarcoma (controls excluding all cancers) || id:finngen_R11_C3_OSTEOSARCOMA_EXALLC | CD33 on Monocytic Myeloid-Derived Suppressor Cells || id:ebi-a-GCST90001952 | MR Egger | 3.03792 | 2 | 0.21894 |
| ebi-a-GCST90001952 | finngen_R11_C3_OSTEOSARCOMA_EXALLC | Osteosarcoma (controls excluding all cancers) || id:finngen_R11_C3_OSTEOSARCOMA_EXALLC | CD33 on Monocytic Myeloid-Derived Suppressor Cells || id:ebi-a-GCST90001952 | Inverse variance weighted | 7.905642 | 3 | 0.048003 |
| ebi-a-GCST90001953 | finngen_R11_C3_OSTEOSARCOMA_EXALLC | Osteosarcoma (controls excluding all cancers) || id:finngen_R11_C3_OSTEOSARCOMA_EXALLC | CD33 on CD33dim HLA DR- || id:ebi-a-GCST90001953 | MR Egger | 3.469659 | 4 | 0.482507 |
| ebi-a-GCST90001953 | finngen_R11_C3_OSTEOSARCOMA_EXALLC | Osteosarcoma (controls excluding all cancers) || id:finngen_R11_C3_OSTEOSARCOMA_EXALLC | CD33 on CD33dim HLA DR- || id:ebi-a-GCST90001953 | Inverse variance weighted | 3.474221 | 5 | 0.627292 |
| ebi-a-GCST90001954 | finngen_R11_C3_OSTEOSARCOMA_EXALLC | Osteosarcoma (controls excluding all cancers) || id:finngen_R11_C3_OSTEOSARCOMA_EXALLC | CD33 on basophil || id:ebi-a-GCST90001954 | MR Egger | 4.519437 | 5 | 0.477287 |
| ebi-a-GCST90001954 | finngen_R11_C3_OSTEOSARCOMA_EXALLC | Osteosarcoma (controls excluding all cancers) || id:finngen_R11_C3_OSTEOSARCOMA_EXALLC | CD33 on basophil || id:ebi-a-GCST90001954 | Inverse variance weighted | 4.524046 | 6 | 0.606134 |
| ebi-a-GCST90001955 | finngen_R11_C3_OSTEOSARCOMA_EXALLC | Osteosarcoma (controls excluding all cancers) || id:finngen_R11_C3_OSTEOSARCOMA_EXALLC | CD33 on Immature Myeloid-Derived Suppressor Cells || id:ebi-a-GCST90001955 | MR Egger | 4.139136 | 4 | 0.387503 |
| ebi-a-GCST90001955 | finngen_R11_C3_OSTEOSARCOMA_EXALLC | Osteosarcoma (controls excluding all cancers) || id:finngen_R11_C3_OSTEOSARCOMA_EXALLC | CD33 on Immature Myeloid-Derived Suppressor Cells || id:ebi-a-GCST90001955 | Inverse variance weighted | 4.233349 | 5 | 0.516332 |
| ebi-a-GCST90001956 | finngen_R11_C3_OSTEOSARCOMA_EXALLC | Osteosarcoma (controls excluding all cancers) || id:finngen_R11_C3_OSTEOSARCOMA_EXALLC | CD33 on CD33+ HLA DR+ || id:ebi-a-GCST90001956 | MR Egger | 2.92647 | 2 | 0.231486 |
| ebi-a-GCST90001956 | finngen_R11_C3_OSTEOSARCOMA_EXALLC | Osteosarcoma (controls excluding all cancers) || id:finngen_R11_C3_OSTEOSARCOMA_EXALLC | CD33 on CD33+ HLA DR+ || id:ebi-a-GCST90001956 | Inverse variance weighted | 7.945424 | 3 | 0.047153 |
| ebi-a-GCST90001957 | finngen_R11_C3_OSTEOSARCOMA_EXALLC | Osteosarcoma (controls excluding all cancers) || id:finngen_R11_C3_OSTEOSARCOMA_EXALLC | CD33 on CD33+ HLA DR+ CD14- || id:ebi-a-GCST90001957 | MR Egger | 2.88877 | 2 | 0.235891 |
| ebi-a-GCST90001957 | finngen_R11_C3_OSTEOSARCOMA_EXALLC | Osteosarcoma (controls excluding all cancers) || id:finngen_R11_C3_OSTEOSARCOMA_EXALLC | CD33 on CD33+ HLA DR+ CD14- || id:ebi-a-GCST90001957 | Inverse variance weighted | 7.950538 | 3 | 0.047045 |
| ebi-a-GCST90001959 | finngen_R11_C3_OSTEOSARCOMA_EXALLC | Osteosarcoma (controls excluding all cancers) || id:finngen_R11_C3_OSTEOSARCOMA_EXALLC | CD4 on HLA DR+ CD4+ T cell || id:ebi-a-GCST90001959 | Inverse variance weighted | 0.070128 | 1 | 0.791151 |
| ebi-a-GCST90001961 | finngen_R11_C3_OSTEOSARCOMA_EXALLC | Osteosarcoma (controls excluding all cancers) || id:finngen_R11_C3_OSTEOSARCOMA_EXALLC | CD25 on CD39+ CD4+ T cell || id:ebi-a-GCST90001961 | MR Egger | 2.895183 | 3 | 0.40807 |
| ebi-a-GCST90001961 | finngen_R11_C3_OSTEOSARCOMA_EXALLC | Osteosarcoma (controls excluding all cancers) || id:finngen_R11_C3_OSTEOSARCOMA_EXALLC | CD25 on CD39+ CD4+ T cell || id:ebi-a-GCST90001961 | Inverse variance weighted | 3.389059 | 4 | 0.494946 |
| ebi-a-GCST90001963 | finngen_R11_C3_OSTEOSARCOMA_EXALLC | Osteosarcoma (controls excluding all cancers) || id:finngen_R11_C3_OSTEOSARCOMA_EXALLC | FSC-A on myeloid Dendritic Cell || id:ebi-a-GCST90001963 | MR Egger | 7.049827 | 1 | 0.007927 |
| ebi-a-GCST90001963 | finngen_R11_C3_OSTEOSARCOMA_EXALLC | Osteosarcoma (controls excluding all cancers) || id:finngen_R11_C3_OSTEOSARCOMA_EXALLC | FSC-A on myeloid Dendritic Cell || id:ebi-a-GCST90001963 | Inverse variance weighted | 8.231273 | 2 | 0.016316 |
| ebi-a-GCST90001964 | finngen_R11_C3_OSTEOSARCOMA_EXALLC | Osteosarcoma (controls excluding all cancers) || id:finngen_R11_C3_OSTEOSARCOMA_EXALLC | FSC-A on plasmacytoid Dendritic Cell || id:ebi-a-GCST90001964 | MR Egger | 0.862815 | 2 | 0.649594 |
| ebi-a-GCST90001964 | finngen_R11_C3_OSTEOSARCOMA_EXALLC | Osteosarcoma (controls excluding all cancers) || id:finngen_R11_C3_OSTEOSARCOMA_EXALLC | FSC-A on plasmacytoid Dendritic Cell || id:ebi-a-GCST90001964 | Inverse variance weighted | 1.362036 | 3 | 0.714457 |
| ebi-a-GCST90001965 | finngen_R11_C3_OSTEOSARCOMA_EXALLC | Osteosarcoma (controls excluding all cancers) || id:finngen_R11_C3_OSTEOSARCOMA_EXALLC | FSC-A on monocyte || id:ebi-a-GCST90001965 | Inverse variance weighted | 1.587046 | 1 | 0.207749 |
| ebi-a-GCST90001966 | finngen_R11_C3_OSTEOSARCOMA_EXALLC | Osteosarcoma (controls excluding all cancers) || id:finngen_R11_C3_OSTEOSARCOMA_EXALLC | FSC-A on granulocyte || id:ebi-a-GCST90001966 | Inverse variance weighted | 0.052117 | 1 | 0.81942 |
| ebi-a-GCST90001969 | finngen_R11_C3_OSTEOSARCOMA_EXALLC | Osteosarcoma (controls excluding all cancers) || id:finngen_R11_C3_OSTEOSARCOMA_EXALLC | FSC-A on Natural Killer || id:ebi-a-GCST90001969 | MR Egger | 1.197549 | 1 | 0.273812 |
| ebi-a-GCST90001969 | finngen_R11_C3_OSTEOSARCOMA_EXALLC | Osteosarcoma (controls excluding all cancers) || id:finngen_R11_C3_OSTEOSARCOMA_EXALLC | FSC-A on Natural Killer || id:ebi-a-GCST90001969 | Inverse variance weighted | 1.767721 | 2 | 0.413185 |
| ebi-a-GCST90001970 | finngen_R11_C3_OSTEOSARCOMA_EXALLC | Osteosarcoma (controls excluding all cancers) || id:finngen_R11_C3_OSTEOSARCOMA_EXALLC | FSC-A on HLA DR+ Natural Killer || id:ebi-a-GCST90001970 | MR Egger | 1.190284 | 2 | 0.551484 |
| ebi-a-GCST90001970 | finngen_R11_C3_OSTEOSARCOMA_EXALLC | Osteosarcoma (controls excluding all cancers) || id:finngen_R11_C3_OSTEOSARCOMA_EXALLC | FSC-A on HLA DR+ Natural Killer || id:ebi-a-GCST90001970 | Inverse variance weighted | 1.402894 | 3 | 0.704856 |
| ebi-a-GCST90001973 | finngen_R11_C3_OSTEOSARCOMA_EXALLC | Osteosarcoma (controls excluding all cancers) || id:finngen_R11_C3_OSTEOSARCOMA_EXALLC | FSC-A on CD4+ T cell || id:ebi-a-GCST90001973 | MR Egger | 0.40116 | 1 | 0.526491 |
| ebi-a-GCST90001973 | finngen_R11_C3_OSTEOSARCOMA_EXALLC | Osteosarcoma (controls excluding all cancers) || id:finngen_R11_C3_OSTEOSARCOMA_EXALLC | FSC-A on CD4+ T cell || id:ebi-a-GCST90001973 | Inverse variance weighted | 0.761398 | 2 | 0.683384 |
| ebi-a-GCST90001976 | finngen_R11_C3_OSTEOSARCOMA_EXALLC | Osteosarcoma (controls excluding all cancers) || id:finngen_R11_C3_OSTEOSARCOMA_EXALLC | FSC-A on Natural Killer T || id:ebi-a-GCST90001976 | Inverse variance weighted | 0.890264 | 1 | 0.345406 |
| ebi-a-GCST90001979 | finngen_R11_C3_OSTEOSARCOMA_EXALLC | Osteosarcoma (controls excluding all cancers) || id:finngen_R11_C3_OSTEOSARCOMA_EXALLC | CD16 on CD14- CD16+ monocyte || id:ebi-a-GCST90001979 | MR Egger | 8.825416 | 6 | 0.183637 |
| ebi-a-GCST90001979 | finngen_R11_C3_OSTEOSARCOMA_EXALLC | Osteosarcoma (controls excluding all cancers) || id:finngen_R11_C3_OSTEOSARCOMA_EXALLC | CD16 on CD14- CD16+ monocyte || id:ebi-a-GCST90001979 | Inverse variance weighted | 8.840034 | 7 | 0.264346 |
| ebi-a-GCST90001980 | finngen_R11_C3_OSTEOSARCOMA_EXALLC | Osteosarcoma (controls excluding all cancers) || id:finngen_R11_C3_OSTEOSARCOMA_EXALLC | CD40 on CD14+ CD16- monocyte || id:ebi-a-GCST90001980 | MR Egger | 3.479029 | 2 | 0.175606 |
| ebi-a-GCST90001980 | finngen_R11_C3_OSTEOSARCOMA_EXALLC | Osteosarcoma (controls excluding all cancers) || id:finngen_R11_C3_OSTEOSARCOMA_EXALLC | CD40 on CD14+ CD16- monocyte || id:ebi-a-GCST90001980 | Inverse variance weighted | 3.696372 | 3 | 0.296172 |
| ebi-a-GCST90001981 | finngen_R11_C3_OSTEOSARCOMA_EXALLC | Osteosarcoma (controls excluding all cancers) || id:finngen_R11_C3_OSTEOSARCOMA_EXALLC | CD40 on CD14+ CD16+ monocyte || id:ebi-a-GCST90001981 | MR Egger | 3.720771 | 3 | 0.293237 |
| ebi-a-GCST90001981 | finngen_R11_C3_OSTEOSARCOMA_EXALLC | Osteosarcoma (controls excluding all cancers) || id:finngen_R11_C3_OSTEOSARCOMA_EXALLC | CD40 on CD14+ CD16+ monocyte || id:ebi-a-GCST90001981 | Inverse variance weighted | 4.741946 | 4 | 0.314815 |
| ebi-a-GCST90001983 | finngen_R11_C3_OSTEOSARCOMA_EXALLC | Osteosarcoma (controls excluding all cancers) || id:finngen_R11_C3_OSTEOSARCOMA_EXALLC | CD14 on CD14+ CD16+ monocyte || id:ebi-a-GCST90001983 | Inverse variance weighted | 0.218538 | 1 | 0.640156 |
| ebi-a-GCST90001984 | finngen_R11_C3_OSTEOSARCOMA_EXALLC | Osteosarcoma (controls excluding all cancers) || id:finngen_R11_C3_OSTEOSARCOMA_EXALLC | HLA DR on CD14- CD16+ monocyte || id:ebi-a-GCST90001984 | MR Egger | 2.49315 | 6 | 0.869233 |
| ebi-a-GCST90001984 | finngen_R11_C3_OSTEOSARCOMA_EXALLC | Osteosarcoma (controls excluding all cancers) || id:finngen_R11_C3_OSTEOSARCOMA_EXALLC | HLA DR on CD14- CD16+ monocyte || id:ebi-a-GCST90001984 | Inverse variance weighted | 5.373986 | 7 | 0.614424 |
| ebi-a-GCST90001985 | finngen_R11_C3_OSTEOSARCOMA_EXALLC | Osteosarcoma (controls excluding all cancers) || id:finngen_R11_C3_OSTEOSARCOMA_EXALLC | CD40 on monocytes || id:ebi-a-GCST90001985 | MR Egger | 6.241962 | 3 | 0.100414 |
| ebi-a-GCST90001985 | finngen_R11_C3_OSTEOSARCOMA_EXALLC | Osteosarcoma (controls excluding all cancers) || id:finngen_R11_C3_OSTEOSARCOMA_EXALLC | CD40 on monocytes || id:ebi-a-GCST90001985 | Inverse variance weighted | 9.010933 | 4 | 0.060827 |
| ebi-a-GCST90001987 | finngen_R11_C3_OSTEOSARCOMA_EXALLC | Osteosarcoma (controls excluding all cancers) || id:finngen_R11_C3_OSTEOSARCOMA_EXALLC | CD64 on CD14+ CD16- monocyte || id:ebi-a-GCST90001987 | MR Egger | 6.07642 | 6 | 0.414684 |
| ebi-a-GCST90001987 | finngen_R11_C3_OSTEOSARCOMA_EXALLC | Osteosarcoma (controls excluding all cancers) || id:finngen_R11_C3_OSTEOSARCOMA_EXALLC | CD64 on CD14+ CD16- monocyte || id:ebi-a-GCST90001987 | Inverse variance weighted | 6.378697 | 7 | 0.496291 |
| ebi-a-GCST90001988 | finngen_R11_C3_OSTEOSARCOMA_EXALLC | Osteosarcoma (controls excluding all cancers) || id:finngen_R11_C3_OSTEOSARCOMA_EXALLC | HLA DR on CD14+ CD16- monocyte || id:ebi-a-GCST90001988 | MR Egger | 6.915333 | 3 | 0.074646 |
| ebi-a-GCST90001988 | finngen_R11_C3_OSTEOSARCOMA_EXALLC | Osteosarcoma (controls excluding all cancers) || id:finngen_R11_C3_OSTEOSARCOMA_EXALLC | HLA DR on CD14+ CD16- monocyte || id:ebi-a-GCST90001988 | Inverse variance weighted | 7.049474 | 4 | 0.133297 |
| ebi-a-GCST90001989 | finngen_R11_C3_OSTEOSARCOMA_EXALLC | Osteosarcoma (controls excluding all cancers) || id:finngen_R11_C3_OSTEOSARCOMA_EXALLC | CD40 on CD14- CD16+ monocyte || id:ebi-a-GCST90001989 | MR Egger | 7.555099 | 7 | 0.373452 |
| ebi-a-GCST90001989 | finngen_R11_C3_OSTEOSARCOMA_EXALLC | Osteosarcoma (controls excluding all cancers) || id:finngen_R11_C3_OSTEOSARCOMA_EXALLC | CD40 on CD14- CD16+ monocyte || id:ebi-a-GCST90001989 | Inverse variance weighted | 9.286257 | 8 | 0.318726 |
| ebi-a-GCST90001990 | finngen_R11_C3_OSTEOSARCOMA_EXALLC | Osteosarcoma (controls excluding all cancers) || id:finngen_R11_C3_OSTEOSARCOMA_EXALLC | CD64 on CD14- CD16+ monocyte || id:ebi-a-GCST90001990 | Inverse variance weighted | 1.598898 | 1 | 0.20606 |
| ebi-a-GCST90001991 | finngen_R11_C3_OSTEOSARCOMA_EXALLC | Osteosarcoma (controls excluding all cancers) || id:finngen_R11_C3_OSTEOSARCOMA_EXALLC | HLA DR on CD14+ monocyte || id:ebi-a-GCST90001991 | MR Egger | 6.901956 | 3 | 0.075089 |
| ebi-a-GCST90001991 | finngen_R11_C3_OSTEOSARCOMA_EXALLC | Osteosarcoma (controls excluding all cancers) || id:finngen_R11_C3_OSTEOSARCOMA_EXALLC | HLA DR on CD14+ monocyte || id:ebi-a-GCST90001991 | Inverse variance weighted | 7.047793 | 4 | 0.133384 |
| ebi-a-GCST90001992 | finngen_R11_C3_OSTEOSARCOMA_EXALLC | Osteosarcoma (controls excluding all cancers) || id:finngen_R11_C3_OSTEOSARCOMA_EXALLC | CCR2 on CD14+ CD16+ monocyte || id:ebi-a-GCST90001992 | Inverse variance weighted | 1.225355 | 1 | 0.268312 |
| ebi-a-GCST90001994 | finngen_R11_C3_OSTEOSARCOMA_EXALLC | Osteosarcoma (controls excluding all cancers) || id:finngen_R11_C3_OSTEOSARCOMA_EXALLC | CX3CR1 on CD14- CD16- || id:ebi-a-GCST90001994 | MR Egger | 0.56439 | 1 | 0.452497 |
| ebi-a-GCST90001994 | finngen_R11_C3_OSTEOSARCOMA_EXALLC | Osteosarcoma (controls excluding all cancers) || id:finngen_R11_C3_OSTEOSARCOMA_EXALLC | CX3CR1 on CD14- CD16- || id:ebi-a-GCST90001994 | Inverse variance weighted | 0.590351 | 2 | 0.744401 |
| ebi-a-GCST90001995 | finngen_R11_C3_OSTEOSARCOMA_EXALLC | Osteosarcoma (controls excluding all cancers) || id:finngen_R11_C3_OSTEOSARCOMA_EXALLC | CX3CR1 on monocyte || id:ebi-a-GCST90001995 | MR Egger | 1.860477 | 1 | 0.17257 |
| ebi-a-GCST90001995 | finngen_R11_C3_OSTEOSARCOMA_EXALLC | Osteosarcoma (controls excluding all cancers) || id:finngen_R11_C3_OSTEOSARCOMA_EXALLC | CX3CR1 on monocyte || id:ebi-a-GCST90001995 | Inverse variance weighted | 1.928914 | 2 | 0.38119 |
| ebi-a-GCST90001996 | finngen_R11_C3_OSTEOSARCOMA_EXALLC | Osteosarcoma (controls excluding all cancers) || id:finngen_R11_C3_OSTEOSARCOMA_EXALLC | CX3CR1 on CD14+ CD16+ monocyte || id:ebi-a-GCST90001996 | MR Egger | 1.758683 | 1 | 0.184789 |
| ebi-a-GCST90001996 | finngen_R11_C3_OSTEOSARCOMA_EXALLC | Osteosarcoma (controls excluding all cancers) || id:finngen_R11_C3_OSTEOSARCOMA_EXALLC | CX3CR1 on CD14+ CD16+ monocyte || id:ebi-a-GCST90001996 | Inverse variance weighted | 1.758828 | 2 | 0.415026 |
| ebi-a-GCST90001997 | finngen_R11_C3_OSTEOSARCOMA_EXALLC | Osteosarcoma (controls excluding all cancers) || id:finngen_R11_C3_OSTEOSARCOMA_EXALLC | CX3CR1 on CD14+ CD16- monocyte || id:ebi-a-GCST90001997 | MR Egger | 1.851312 | 1 | 0.173631 |
| ebi-a-GCST90001997 | finngen_R11_C3_OSTEOSARCOMA_EXALLC | Osteosarcoma (controls excluding all cancers) || id:finngen_R11_C3_OSTEOSARCOMA_EXALLC | CX3CR1 on CD14+ CD16- monocyte || id:ebi-a-GCST90001997 | Inverse variance weighted | 1.852764 | 2 | 0.395984 |
| ebi-a-GCST90001999 | finngen_R11_C3_OSTEOSARCOMA_EXALLC | Osteosarcoma (controls excluding all cancers) || id:finngen_R11_C3_OSTEOSARCOMA_EXALLC | PDL-1 on CD14- CD16+ monocyte || id:ebi-a-GCST90001999 | Inverse variance weighted | 0.123926 | 1 | 0.724815 |
| ebi-a-GCST90002001 | finngen_R11_C3_OSTEOSARCOMA_EXALLC | Osteosarcoma (controls excluding all cancers) || id:finngen_R11_C3_OSTEOSARCOMA_EXALLC | CD64 on CD14- CD16- || id:ebi-a-GCST90002001 | MR Egger | 0.3419 | 1 | 0.558735 |
| ebi-a-GCST90002001 | finngen_R11_C3_OSTEOSARCOMA_EXALLC | Osteosarcoma (controls excluding all cancers) || id:finngen_R11_C3_OSTEOSARCOMA_EXALLC | CD64 on CD14- CD16- || id:ebi-a-GCST90002001 | Inverse variance weighted | 1.350476 | 2 | 0.509035 |
| ebi-a-GCST90002002 | finngen_R11_C3_OSTEOSARCOMA_EXALLC | Osteosarcoma (controls excluding all cancers) || id:finngen_R11_C3_OSTEOSARCOMA_EXALLC | PDL-1 on monocyte || id:ebi-a-GCST90002002 | Inverse variance weighted | 0.090269 | 1 | 0.763835 |
| ebi-a-GCST90002003 | finngen_R11_C3_OSTEOSARCOMA_EXALLC | Osteosarcoma (controls excluding all cancers) || id:finngen_R11_C3_OSTEOSARCOMA_EXALLC | CCR2 on CD14- CD16- || id:ebi-a-GCST90002003 | MR Egger | 1.038036 | 1 | 0.308279 |
| ebi-a-GCST90002003 | finngen_R11_C3_OSTEOSARCOMA_EXALLC | Osteosarcoma (controls excluding all cancers) || id:finngen_R11_C3_OSTEOSARCOMA_EXALLC | CCR2 on CD14- CD16- || id:ebi-a-GCST90002003 | Inverse variance weighted | 1.12592 | 2 | 0.569521 |
| ebi-a-GCST90002004 | finngen_R11_C3_OSTEOSARCOMA_EXALLC | Osteosarcoma (controls excluding all cancers) || id:finngen_R11_C3_OSTEOSARCOMA_EXALLC | CCR2 on CD14+ CD16- monocyte || id:ebi-a-GCST90002004 | MR Egger | 2.01166 | 1 | 0.156094 |
| ebi-a-GCST90002004 | finngen_R11_C3_OSTEOSARCOMA_EXALLC | Osteosarcoma (controls excluding all cancers) || id:finngen_R11_C3_OSTEOSARCOMA_EXALLC | CCR2 on CD14+ CD16- monocyte || id:ebi-a-GCST90002004 | Inverse variance weighted | 2.231021 | 2 | 0.327748 |
| ebi-a-GCST90002005 | finngen_R11_C3_OSTEOSARCOMA_EXALLC | Osteosarcoma (controls excluding all cancers) || id:finngen_R11_C3_OSTEOSARCOMA_EXALLC | CD16 on CD14+ CD16+ monocyte || id:ebi-a-GCST90002005 | MR Egger | 7.153061 | 3 | 0.067176 |
| ebi-a-GCST90002005 | finngen_R11_C3_OSTEOSARCOMA_EXALLC | Osteosarcoma (controls excluding all cancers) || id:finngen_R11_C3_OSTEOSARCOMA_EXALLC | CD16 on CD14+ CD16+ monocyte || id:ebi-a-GCST90002005 | Inverse variance weighted | 7.211078 | 4 | 0.125145 |
| ebi-a-GCST90002006 | finngen_R11_C3_OSTEOSARCOMA_EXALLC | Osteosarcoma (controls excluding all cancers) || id:finngen_R11_C3_OSTEOSARCOMA_EXALLC | CD64 on monocyte || id:ebi-a-GCST90002006 | MR Egger | 6.102737 | 6 | 0.411781 |
| ebi-a-GCST90002006 | finngen_R11_C3_OSTEOSARCOMA_EXALLC | Osteosarcoma (controls excluding all cancers) || id:finngen_R11_C3_OSTEOSARCOMA_EXALLC | CD64 on monocyte || id:ebi-a-GCST90002006 | Inverse variance weighted | 6.374233 | 7 | 0.496793 |
| ebi-a-GCST90002007 | finngen_R11_C3_OSTEOSARCOMA_EXALLC | Osteosarcoma (controls excluding all cancers) || id:finngen_R11_C3_OSTEOSARCOMA_EXALLC | HLA DR on CD14+ CD16+ monocyte || id:ebi-a-GCST90002007 | MR Egger | 0.218858 | 3 | 0.974489 |
| ebi-a-GCST90002007 | finngen_R11_C3_OSTEOSARCOMA_EXALLC | Osteosarcoma (controls excluding all cancers) || id:finngen_R11_C3_OSTEOSARCOMA_EXALLC | HLA DR on CD14+ CD16+ monocyte || id:ebi-a-GCST90002007 | Inverse variance weighted | 1.393998 | 4 | 0.845237 |
| ebi-a-GCST90002008 | finngen_R11_C3_OSTEOSARCOMA_EXALLC | Osteosarcoma (controls excluding all cancers) || id:finngen_R11_C3_OSTEOSARCOMA_EXALLC | CCR2 on monocyte || id:ebi-a-GCST90002008 | Inverse variance weighted | 1.968754 | 1 | 0.16058 |
| ebi-a-GCST90002009 | finngen_R11_C3_OSTEOSARCOMA_EXALLC | Osteosarcoma (controls excluding all cancers) || id:finngen_R11_C3_OSTEOSARCOMA_EXALLC | HLA DR on CD14- CD16- || id:ebi-a-GCST90002009 | MR Egger | 1.703644 | 2 | 0.426637 |
| ebi-a-GCST90002009 | finngen_R11_C3_OSTEOSARCOMA_EXALLC | Osteosarcoma (controls excluding all cancers) || id:finngen_R11_C3_OSTEOSARCOMA_EXALLC | HLA DR on CD14- CD16- || id:ebi-a-GCST90002009 | Inverse variance weighted | 3.240652 | 3 | 0.355989 |
| ebi-a-GCST90002010 | finngen_R11_C3_OSTEOSARCOMA_EXALLC | Osteosarcoma (controls excluding all cancers) || id:finngen_R11_C3_OSTEOSARCOMA_EXALLC | HLA DR on monocyte || id:ebi-a-GCST90002010 | MR Egger | 0.110246 | 2 | 0.946369 |
| ebi-a-GCST90002010 | finngen_R11_C3_OSTEOSARCOMA_EXALLC | Osteosarcoma (controls excluding all cancers) || id:finngen_R11_C3_OSTEOSARCOMA_EXALLC | HLA DR on monocyte || id:ebi-a-GCST90002010 | Inverse variance weighted | 0.816798 | 3 | 0.845445 |
| ebi-a-GCST90002011 | finngen_R11_C3_OSTEOSARCOMA_EXALLC | Osteosarcoma (controls excluding all cancers) || id:finngen_R11_C3_OSTEOSARCOMA_EXALLC | CD64 on CD14+ CD16+ monocyte || id:ebi-a-GCST90002011 | Inverse variance weighted | 0.521246 | 1 | 0.470311 |
| ebi-a-GCST90002013 | finngen_R11_C3_OSTEOSARCOMA_EXALLC | Osteosarcoma (controls excluding all cancers) || id:finngen_R11_C3_OSTEOSARCOMA_EXALLC | CCR2 on myeloid Dendritic Cell || id:ebi-a-GCST90002013 | MR Egger | 0.394576 | 1 | 0.529904 |
| ebi-a-GCST90002013 | finngen_R11_C3_OSTEOSARCOMA_EXALLC | Osteosarcoma (controls excluding all cancers) || id:finngen_R11_C3_OSTEOSARCOMA_EXALLC | CCR2 on myeloid Dendritic Cell || id:ebi-a-GCST90002013 | Inverse variance weighted | 0.632605 | 2 | 0.728839 |
| ebi-a-GCST90002014 | finngen_R11_C3_OSTEOSARCOMA_EXALLC | Osteosarcoma (controls excluding all cancers) || id:finngen_R11_C3_OSTEOSARCOMA_EXALLC | CCR2 on CD62L+ myeloid Dendritic Cell || id:ebi-a-GCST90002014 | MR Egger | 2.366576 | 1 | 0.123959 |
| ebi-a-GCST90002014 | finngen_R11_C3_OSTEOSARCOMA_EXALLC | Osteosarcoma (controls excluding all cancers) || id:finngen_R11_C3_OSTEOSARCOMA_EXALLC | CCR2 on CD62L+ myeloid Dendritic Cell || id:ebi-a-GCST90002014 | Inverse variance weighted | 2.408993 | 2 | 0.299843 |
| ebi-a-GCST90002015 | finngen_R11_C3_OSTEOSARCOMA_EXALLC | Osteosarcoma (controls excluding all cancers) || id:finngen_R11_C3_OSTEOSARCOMA_EXALLC | CCR2 on plasmacytoid Dendritic Cell || id:ebi-a-GCST90002015 | Inverse variance weighted | 0.324346 | 1 | 0.569008 |
| ebi-a-GCST90002016 | finngen_R11_C3_OSTEOSARCOMA_EXALLC | Osteosarcoma (controls excluding all cancers) || id:finngen_R11_C3_OSTEOSARCOMA_EXALLC | CCR2 on CD62L+ plasmacytoid Dendritic Cell || id:ebi-a-GCST90002016 | Inverse variance weighted | 0.323952 | 1 | 0.569242 |
| ebi-a-GCST90002017 | finngen_R11_C3_OSTEOSARCOMA_EXALLC | Osteosarcoma (controls excluding all cancers) || id:finngen_R11_C3_OSTEOSARCOMA_EXALLC | CCR2 on monocyte || id:ebi-a-GCST90002017 | Inverse variance weighted | 0.676677 | 1 | 0.410733 |
| ebi-a-GCST90002018 | finngen_R11_C3_OSTEOSARCOMA_EXALLC | Osteosarcoma (controls excluding all cancers) || id:finngen_R11_C3_OSTEOSARCOMA_EXALLC | CCR2 on granulocyte || id:ebi-a-GCST90002018 | Inverse variance weighted | 0.072 | 1 | 0.788446 |
| ebi-a-GCST90002023 | finngen_R11_C3_OSTEOSARCOMA_EXALLC | Osteosarcoma (controls excluding all cancers) || id:finngen_R11_C3_OSTEOSARCOMA_EXALLC | CD4 on Central Memory CD4+ T cell || id:ebi-a-GCST90002023 | Inverse variance weighted | 0.449994 | 1 | 0.502338 |
| ebi-a-GCST90002024 | finngen_R11_C3_OSTEOSARCOMA_EXALLC | Osteosarcoma (controls excluding all cancers) || id:finngen_R11_C3_OSTEOSARCOMA_EXALLC | CD4 on naive CD4+ T cell || id:ebi-a-GCST90002024 | MR Egger | 4.517906 | 3 | 0.210699 |
| ebi-a-GCST90002024 | finngen_R11_C3_OSTEOSARCOMA_EXALLC | Osteosarcoma (controls excluding all cancers) || id:finngen_R11_C3_OSTEOSARCOMA_EXALLC | CD4 on naive CD4+ T cell || id:ebi-a-GCST90002024 | Inverse variance weighted | 6.377954 | 4 | 0.172645 |
| ebi-a-GCST90002025 | finngen_R11_C3_OSTEOSARCOMA_EXALLC | Osteosarcoma (controls excluding all cancers) || id:finngen_R11_C3_OSTEOSARCOMA_EXALLC | CD4 on Effector Memory CD4+ T cell || id:ebi-a-GCST90002025 | MR Egger | 1.18532 | 1 | 0.276276 |
| ebi-a-GCST90002025 | finngen_R11_C3_OSTEOSARCOMA_EXALLC | Osteosarcoma (controls excluding all cancers) || id:finngen_R11_C3_OSTEOSARCOMA_EXALLC | CD4 on Effector Memory CD4+ T cell || id:ebi-a-GCST90002025 | Inverse variance weighted | 1.188508 | 2 | 0.551974 |
| ebi-a-GCST90002027 | finngen_R11_C3_OSTEOSARCOMA_EXALLC | Osteosarcoma (controls excluding all cancers) || id:finngen_R11_C3_OSTEOSARCOMA_EXALLC | CD4 on CD45RA+ CD4+ T cell || id:ebi-a-GCST90002027 | Inverse variance weighted | 0.449662 | 1 | 0.502496 |
| ebi-a-GCST90002029 | finngen_R11_C3_OSTEOSARCOMA_EXALLC | Osteosarcoma (controls excluding all cancers) || id:finngen_R11_C3_OSTEOSARCOMA_EXALLC | CD39 on CD39+ CD8+ T cell || id:ebi-a-GCST90002029 | Inverse variance weighted | 0.114371 | 1 | 0.735222 |
| ebi-a-GCST90002030 | finngen_R11_C3_OSTEOSARCOMA_EXALLC | Osteosarcoma (controls excluding all cancers) || id:finngen_R11_C3_OSTEOSARCOMA_EXALLC | CD39 on CD39+ activated CD4 regulatory T cell || id:ebi-a-GCST90002030 | MR Egger | 0.656723 | 4 | 0.956557 |
| ebi-a-GCST90002030 | finngen_R11_C3_OSTEOSARCOMA_EXALLC | Osteosarcoma (controls excluding all cancers) || id:finngen_R11_C3_OSTEOSARCOMA_EXALLC | CD39 on CD39+ activated CD4 regulatory T cell || id:ebi-a-GCST90002030 | Inverse variance weighted | 0.956773 | 5 | 0.965976 |
| ebi-a-GCST90002031 | finngen_R11_C3_OSTEOSARCOMA_EXALLC | Osteosarcoma (controls excluding all cancers) || id:finngen_R11_C3_OSTEOSARCOMA_EXALLC | CD39 on CD39+ secreting CD4 regulatory T cell || id:ebi-a-GCST90002031 | MR Egger | 0.651721 | 4 | 0.957146 |
| ebi-a-GCST90002031 | finngen_R11_C3_OSTEOSARCOMA_EXALLC | Osteosarcoma (controls excluding all cancers) || id:finngen_R11_C3_OSTEOSARCOMA_EXALLC | CD39 on CD39+ secreting CD4 regulatory T cell || id:ebi-a-GCST90002031 | Inverse variance weighted | 0.958181 | 5 | 0.965868 |
| ebi-a-GCST90002032 | finngen_R11_C3_OSTEOSARCOMA_EXALLC | Osteosarcoma (controls excluding all cancers) || id:finngen_R11_C3_OSTEOSARCOMA_EXALLC | CD39 on CD39+ CD4+ T cell || id:ebi-a-GCST90002032 | MR Egger | 0.22388 | 3 | 0.973645 |
| ebi-a-GCST90002032 | finngen_R11_C3_OSTEOSARCOMA_EXALLC | Osteosarcoma (controls excluding all cancers) || id:finngen_R11_C3_OSTEOSARCOMA_EXALLC | CD39 on CD39+ CD4+ T cell || id:ebi-a-GCST90002032 | Inverse variance weighted | 0.500514 | 4 | 0.973451 |
| ebi-a-GCST90002033 | finngen_R11_C3_OSTEOSARCOMA_EXALLC | Osteosarcoma (controls excluding all cancers) || id:finngen_R11_C3_OSTEOSARCOMA_EXALLC | CD39 on granulocyte || id:ebi-a-GCST90002033 | Inverse variance weighted | 0.214666 | 1 | 0.643135 |
| ebi-a-GCST90002034 | finngen_R11_C3_OSTEOSARCOMA_EXALLC | Osteosarcoma (controls excluding all cancers) || id:finngen_R11_C3_OSTEOSARCOMA_EXALLC | CD39 on monocyte || id:ebi-a-GCST90002034 | Inverse variance weighted | 0.617066 | 1 | 0.432139 |
| ebi-a-GCST90002035 | finngen_R11_C3_OSTEOSARCOMA_EXALLC | Osteosarcoma (controls excluding all cancers) || id:finngen_R11_C3_OSTEOSARCOMA_EXALLC | CD80 on myeloid Dendritic Cell || id:ebi-a-GCST90002035 | MR Egger | 1.04585 | 2 | 0.592784 |
| ebi-a-GCST90002035 | finngen_R11_C3_OSTEOSARCOMA_EXALLC | Osteosarcoma (controls excluding all cancers) || id:finngen_R11_C3_OSTEOSARCOMA_EXALLC | CD80 on myeloid Dendritic Cell || id:ebi-a-GCST90002035 | Inverse variance weighted | 1.416602 | 3 | 0.701648 |
| ebi-a-GCST90002036 | finngen_R11_C3_OSTEOSARCOMA_EXALLC | Osteosarcoma (controls excluding all cancers) || id:finngen_R11_C3_OSTEOSARCOMA_EXALLC | CD80 on CD62L+ myeloid Dendritic Cell || id:ebi-a-GCST90002036 | MR Egger | 0.25516 | 1 | 0.613465 |
| ebi-a-GCST90002036 | finngen_R11_C3_OSTEOSARCOMA_EXALLC | Osteosarcoma (controls excluding all cancers) || id:finngen_R11_C3_OSTEOSARCOMA_EXALLC | CD80 on CD62L+ myeloid Dendritic Cell || id:ebi-a-GCST90002036 | Inverse variance weighted | 0.670436 | 2 | 0.715182 |
| ebi-a-GCST90002037 | finngen_R11_C3_OSTEOSARCOMA_EXALLC | Osteosarcoma (controls excluding all cancers) || id:finngen_R11_C3_OSTEOSARCOMA_EXALLC | CD80 on plasmacytoid Dendritic Cell || id:ebi-a-GCST90002037 | Inverse variance weighted | 0.008632 | 1 | 0.925975 |
| ebi-a-GCST90002038 | finngen_R11_C3_OSTEOSARCOMA_EXALLC | Osteosarcoma (controls excluding all cancers) || id:finngen_R11_C3_OSTEOSARCOMA_EXALLC | CD80 on CD62L+ plasmacytoid Dendritic Cell || id:ebi-a-GCST90002038 | Inverse variance weighted | 0.008777 | 1 | 0.925357 |
| ebi-a-GCST90002039 | finngen_R11_C3_OSTEOSARCOMA_EXALLC | Osteosarcoma (controls excluding all cancers) || id:finngen_R11_C3_OSTEOSARCOMA_EXALLC | CD80 on monocyte || id:ebi-a-GCST90002039 | MR Egger | 12.72974 | 4 | 0.012675 |
| ebi-a-GCST90002039 | finngen_R11_C3_OSTEOSARCOMA_EXALLC | Osteosarcoma (controls excluding all cancers) || id:finngen_R11_C3_OSTEOSARCOMA_EXALLC | CD80 on monocyte || id:ebi-a-GCST90002039 | Inverse variance weighted | 13.62861 | 5 | 0.018149 |
| ebi-a-GCST90002040 | finngen_R11_C3_OSTEOSARCOMA_EXALLC | Osteosarcoma (controls excluding all cancers) || id:finngen_R11_C3_OSTEOSARCOMA_EXALLC | CD80 on granulocyte || id:ebi-a-GCST90002040 | MR Egger | 2.354797 | 1 | 0.124898 |
| ebi-a-GCST90002040 | finngen_R11_C3_OSTEOSARCOMA_EXALLC | Osteosarcoma (controls excluding all cancers) || id:finngen_R11_C3_OSTEOSARCOMA_EXALLC | CD80 on granulocyte || id:ebi-a-GCST90002040 | Inverse variance weighted | 2.818568 | 2 | 0.244318 |
| ebi-a-GCST90002045 | finngen_R11_C3_OSTEOSARCOMA_EXALLC | Osteosarcoma (controls excluding all cancers) || id:finngen_R11_C3_OSTEOSARCOMA_EXALLC | CD45 on CD33- HLA DR- || id:ebi-a-GCST90002045 | Inverse variance weighted | 3.025559 | 1 | 0.081962 |
| ebi-a-GCST90002046 | finngen_R11_C3_OSTEOSARCOMA_EXALLC | Osteosarcoma (controls excluding all cancers) || id:finngen_R11_C3_OSTEOSARCOMA_EXALLC | CD45 on CD33- HLA DR+ || id:ebi-a-GCST90002046 | Inverse variance weighted | 0.002381 | 1 | 0.961082 |
| ebi-a-GCST90002052 | finngen_R11_C3_OSTEOSARCOMA_EXALLC | Osteosarcoma (controls excluding all cancers) || id:finngen_R11_C3_OSTEOSARCOMA_EXALLC | CD45 on Immature Myeloid-Derived Suppressor Cells || id:ebi-a-GCST90002052 | Inverse variance weighted | 0.415129 | 1 | 0.519378 |
| ebi-a-GCST90002054 | finngen_R11_C3_OSTEOSARCOMA_EXALLC | Osteosarcoma (controls excluding all cancers) || id:finngen_R11_C3_OSTEOSARCOMA_EXALLC | CD8 on Central Memory CD8+ T cell || id:ebi-a-GCST90002054 | MR Egger | 0.234121 | 1 | 0.628485 |
| ebi-a-GCST90002054 | finngen_R11_C3_OSTEOSARCOMA_EXALLC | Osteosarcoma (controls excluding all cancers) || id:finngen_R11_C3_OSTEOSARCOMA_EXALLC | CD8 on Central Memory CD8+ T cell || id:ebi-a-GCST90002054 | Inverse variance weighted | 0.234674 | 2 | 0.889286 |
| ebi-a-GCST90002055 | finngen_R11_C3_OSTEOSARCOMA_EXALLC | Osteosarcoma (controls excluding all cancers) || id:finngen_R11_C3_OSTEOSARCOMA_EXALLC | CD8 on naive CD8+ T cell || id:ebi-a-GCST90002055 | Inverse variance weighted | 0.373507 | 1 | 0.541099 |
| ebi-a-GCST90002056 | finngen_R11_C3_OSTEOSARCOMA_EXALLC | Osteosarcoma (controls excluding all cancers) || id:finngen_R11_C3_OSTEOSARCOMA_EXALLC | CD8 on Effector Memory CD8+ T cell || id:ebi-a-GCST90002056 | MR Egger | 0.286164 | 2 | 0.866683 |
| ebi-a-GCST90002056 | finngen_R11_C3_OSTEOSARCOMA_EXALLC | Osteosarcoma (controls excluding all cancers) || id:finngen_R11_C3_OSTEOSARCOMA_EXALLC | CD8 on Effector Memory CD8+ T cell || id:ebi-a-GCST90002056 | Inverse variance weighted | 0.971411 | 3 | 0.808169 |
| ebi-a-GCST90002057 | finngen_R11_C3_OSTEOSARCOMA_EXALLC | Osteosarcoma (controls excluding all cancers) || id:finngen_R11_C3_OSTEOSARCOMA_EXALLC | CD8 on Terminally Differentiated CD8+ T cell || id:ebi-a-GCST90002057 | Inverse variance weighted | 0.174615 | 1 | 0.676042 |
| ebi-a-GCST90002058 | finngen_R11_C3_OSTEOSARCOMA_EXALLC | Osteosarcoma (controls excluding all cancers) || id:finngen_R11_C3_OSTEOSARCOMA_EXALLC | CD8 on CD8+ T cell || id:ebi-a-GCST90002058 | Inverse variance weighted | 0.026317 | 1 | 0.87113 |
| ebi-a-GCST90002059 | finngen_R11_C3_OSTEOSARCOMA_EXALLC | Osteosarcoma (controls excluding all cancers) || id:finngen_R11_C3_OSTEOSARCOMA_EXALLC | CD8 on Natural Killer T || id:ebi-a-GCST90002059 | Inverse variance weighted | 0.023316 | 1 | 0.878637 |
| ebi-a-GCST90002060 | finngen_R11_C3_OSTEOSARCOMA_EXALLC | Osteosarcoma (controls excluding all cancers) || id:finngen_R11_C3_OSTEOSARCOMA_EXALLC | CD8 on HLA DR+ CD8+ T cell || id:ebi-a-GCST90002060 | Inverse variance weighted | 0.014981 | 1 | 0.902583 |
| ebi-a-GCST90002061 | finngen_R11_C3_OSTEOSARCOMA_EXALLC | Osteosarcoma (controls excluding all cancers) || id:finngen_R11_C3_OSTEOSARCOMA_EXALLC | CD4 on CD39+ CD4+ T cell || id:ebi-a-GCST90002061 | MR Egger | 3.731267 | 5 | 0.588718 |
| ebi-a-GCST90002061 | finngen_R11_C3_OSTEOSARCOMA_EXALLC | Osteosarcoma (controls excluding all cancers) || id:finngen_R11_C3_OSTEOSARCOMA_EXALLC | CD4 on CD39+ CD4+ T cell || id:ebi-a-GCST90002061 | Inverse variance weighted | 3.847691 | 6 | 0.697279 |
| ebi-a-GCST90002062 | finngen_R11_C3_OSTEOSARCOMA_EXALLC | Osteosarcoma (controls excluding all cancers) || id:finngen_R11_C3_OSTEOSARCOMA_EXALLC | CD4 on CD28+ CD4+ T cell || id:ebi-a-GCST90002062 | Inverse variance weighted | 0.029872 | 1 | 0.862781 |
| ebi-a-GCST90002067 | finngen_R11_C3_OSTEOSARCOMA_EXALLC | Osteosarcoma (controls excluding all cancers) || id:finngen_R11_C3_OSTEOSARCOMA_EXALLC | CD4 on CD39+ activated CD4 regulatory T cell || id:ebi-a-GCST90002067 | MR Egger | 0.031233 | 2 | 0.984505 |
| ebi-a-GCST90002067 | finngen_R11_C3_OSTEOSARCOMA_EXALLC | Osteosarcoma (controls excluding all cancers) || id:finngen_R11_C3_OSTEOSARCOMA_EXALLC | CD4 on CD39+ activated CD4 regulatory T cell || id:ebi-a-GCST90002067 | Inverse variance weighted | 0.276294 | 3 | 0.964423 |
| ebi-a-GCST90002069 | finngen_R11_C3_OSTEOSARCOMA_EXALLC | Osteosarcoma (controls excluding all cancers) || id:finngen_R11_C3_OSTEOSARCOMA_EXALLC | CD4 on CD39+ secreting CD4 regulatory T cell || id:ebi-a-GCST90002069 | MR Egger | 0.431506 | 1 | 0.511251 |
| ebi-a-GCST90002069 | finngen_R11_C3_OSTEOSARCOMA_EXALLC | Osteosarcoma (controls excluding all cancers) || id:finngen_R11_C3_OSTEOSARCOMA_EXALLC | CD4 on CD39+ secreting CD4 regulatory T cell || id:ebi-a-GCST90002069 | Inverse variance weighted | 0.519414 | 2 | 0.771278 |
| ebi-a-GCST90002071 | finngen_R11_C3_OSTEOSARCOMA_EXALLC | Osteosarcoma (controls excluding all cancers) || id:finngen_R11_C3_OSTEOSARCOMA_EXALLC | SSC-A on myeloid Dendritic Cell || id:ebi-a-GCST90002071 | MR Egger | 5.498239 | 4 | 0.239884 |
| ebi-a-GCST90002071 | finngen_R11_C3_OSTEOSARCOMA_EXALLC | Osteosarcoma (controls excluding all cancers) || id:finngen_R11_C3_OSTEOSARCOMA_EXALLC | SSC-A on myeloid Dendritic Cell || id:ebi-a-GCST90002071 | Inverse variance weighted | 6.267145 | 5 | 0.281086 |
| ebi-a-GCST90002072 | finngen_R11_C3_OSTEOSARCOMA_EXALLC | Osteosarcoma (controls excluding all cancers) || id:finngen_R11_C3_OSTEOSARCOMA_EXALLC | SSC-A on plasmacytoid Dendritic Cell || id:ebi-a-GCST90002072 | MR Egger | 2.798395 | 3 | 0.423764 |
| ebi-a-GCST90002072 | finngen_R11_C3_OSTEOSARCOMA_EXALLC | Osteosarcoma (controls excluding all cancers) || id:finngen_R11_C3_OSTEOSARCOMA_EXALLC | SSC-A on plasmacytoid Dendritic Cell || id:ebi-a-GCST90002072 | Inverse variance weighted | 3.020318 | 4 | 0.554431 |
| ebi-a-GCST90002073 | finngen_R11_C3_OSTEOSARCOMA_EXALLC | Osteosarcoma (controls excluding all cancers) || id:finngen_R11_C3_OSTEOSARCOMA_EXALLC | SSC-A on monocyte || id:ebi-a-GCST90002073 | MR Egger | 3.281743 | 6 | 0.772744 |
| ebi-a-GCST90002073 | finngen_R11_C3_OSTEOSARCOMA_EXALLC | Osteosarcoma (controls excluding all cancers) || id:finngen_R11_C3_OSTEOSARCOMA_EXALLC | SSC-A on monocyte || id:ebi-a-GCST90002073 | Inverse variance weighted | 3.412515 | 7 | 0.844403 |
| ebi-a-GCST90002074 | finngen_R11_C3_OSTEOSARCOMA_EXALLC | Osteosarcoma (controls excluding all cancers) || id:finngen_R11_C3_OSTEOSARCOMA_EXALLC | SSC-A on CD14+ monocyte || id:ebi-a-GCST90002074 | MR Egger | 1.337784 | 4 | 0.854933 |
| ebi-a-GCST90002074 | finngen_R11_C3_OSTEOSARCOMA_EXALLC | Osteosarcoma (controls excluding all cancers) || id:finngen_R11_C3_OSTEOSARCOMA_EXALLC | SSC-A on CD14+ monocyte || id:ebi-a-GCST90002074 | Inverse variance weighted | 1.626652 | 5 | 0.898008 |
| ebi-a-GCST90002077 | finngen_R11_C3_OSTEOSARCOMA_EXALLC | Osteosarcoma (controls excluding all cancers) || id:finngen_R11_C3_OSTEOSARCOMA_EXALLC | SSC-A on HLA DR+ Natural Killer || id:ebi-a-GCST90002077 | MR Egger | 0.013212 | 1 | 0.908489 |
| ebi-a-GCST90002077 | finngen_R11_C3_OSTEOSARCOMA_EXALLC | Osteosarcoma (controls excluding all cancers) || id:finngen_R11_C3_OSTEOSARCOMA_EXALLC | SSC-A on HLA DR+ Natural Killer || id:ebi-a-GCST90002077 | Inverse variance weighted | 0.561855 | 2 | 0.755083 |
| ebi-a-GCST90002078 | finngen_R11_C3_OSTEOSARCOMA_EXALLC | Osteosarcoma (controls excluding all cancers) || id:finngen_R11_C3_OSTEOSARCOMA_EXALLC | SSC-A on granulocyte || id:ebi-a-GCST90002078 | MR Egger | 0.374369 | 1 | 0.540632 |
| ebi-a-GCST90002078 | finngen_R11_C3_OSTEOSARCOMA_EXALLC | Osteosarcoma (controls excluding all cancers) || id:finngen_R11_C3_OSTEOSARCOMA_EXALLC | SSC-A on granulocyte || id:ebi-a-GCST90002078 | Inverse variance weighted | 1.848071 | 2 | 0.396914 |
| ebi-a-GCST90002081 | finngen_R11_C3_OSTEOSARCOMA_EXALLC | Osteosarcoma (controls excluding all cancers) || id:finngen_R11_C3_OSTEOSARCOMA_EXALLC | SSC-A on CD4+ T cell || id:ebi-a-GCST90002081 | MR Egger | 0.330929 | 2 | 0.8475 |
| ebi-a-GCST90002081 | finngen_R11_C3_OSTEOSARCOMA_EXALLC | Osteosarcoma (controls excluding all cancers) || id:finngen_R11_C3_OSTEOSARCOMA_EXALLC | SSC-A on CD4+ T cell || id:ebi-a-GCST90002081 | Inverse variance weighted | 0.486151 | 3 | 0.921923 |
| ebi-a-GCST90002084 | finngen_R11_C3_OSTEOSARCOMA_EXALLC | Osteosarcoma (controls excluding all cancers) || id:finngen_R11_C3_OSTEOSARCOMA_EXALLC | SSC-A on Natural Killer T || id:ebi-a-GCST90002084 | Inverse variance weighted | 0.361751 | 1 | 0.547535 |
| ebi-a-GCST90002087 | finngen_R11_C3_OSTEOSARCOMA_EXALLC | Osteosarcoma (controls excluding all cancers) || id:finngen_R11_C3_OSTEOSARCOMA_EXALLC | CD11c on myeloid Dendritic Cell || id:ebi-a-GCST90002087 | MR Egger | 3.051513 | 3 | 0.383751 |
| ebi-a-GCST90002087 | finngen_R11_C3_OSTEOSARCOMA_EXALLC | Osteosarcoma (controls excluding all cancers) || id:finngen_R11_C3_OSTEOSARCOMA_EXALLC | CD11c on myeloid Dendritic Cell || id:ebi-a-GCST90002087 | Inverse variance weighted | 3.104257 | 4 | 0.540532 |
| ebi-a-GCST90002088 | finngen_R11_C3_OSTEOSARCOMA_EXALLC | Osteosarcoma (controls excluding all cancers) || id:finngen_R11_C3_OSTEOSARCOMA_EXALLC | CD11c on CD62L+ myeloid Dendritic Cell || id:ebi-a-GCST90002088 | Inverse variance weighted | 2.343648 | 1 | 0.125795 |
| ebi-a-GCST90002089 | finngen_R11_C3_OSTEOSARCOMA_EXALLC | Osteosarcoma (controls excluding all cancers) || id:finngen_R11_C3_OSTEOSARCOMA_EXALLC | CD11c on monocyte || id:ebi-a-GCST90002089 | Inverse variance weighted | 1.617482 | 1 | 0.203443 |
| ebi-a-GCST90002090 | finngen_R11_C3_OSTEOSARCOMA_EXALLC | Osteosarcoma (controls excluding all cancers) || id:finngen_R11_C3_OSTEOSARCOMA_EXALLC | CD11c on granulocyte || id:ebi-a-GCST90002090 | MR Egger | 0.035413 | 1 | 0.850732 |
| ebi-a-GCST90002090 | finngen_R11_C3_OSTEOSARCOMA_EXALLC | Osteosarcoma (controls excluding all cancers) || id:finngen_R11_C3_OSTEOSARCOMA_EXALLC | CD11c on granulocyte || id:ebi-a-GCST90002090 | Inverse variance weighted | 0.175679 | 2 | 0.915908 |
| ebi-a-GCST90002098 | finngen_R11_C3_OSTEOSARCOMA_EXALLC | Osteosarcoma (controls excluding all cancers) || id:finngen_R11_C3_OSTEOSARCOMA_EXALLC | CD45RA on naive CD4+ T cell || id:ebi-a-GCST90002098 | MR Egger | 2.503138 | 8 | 0.961584 |
| ebi-a-GCST90002098 | finngen_R11_C3_OSTEOSARCOMA_EXALLC | Osteosarcoma (controls excluding all cancers) || id:finngen_R11_C3_OSTEOSARCOMA_EXALLC | CD45RA on naive CD4+ T cell || id:ebi-a-GCST90002098 | Inverse variance weighted | 2.503716 | 9 | 0.980783 |
| ebi-a-GCST90002099 | finngen_R11_C3_OSTEOSARCOMA_EXALLC | Osteosarcoma (controls excluding all cancers) || id:finngen_R11_C3_OSTEOSARCOMA_EXALLC | CD4RA on Terminally Differentiated CD4+ T cell || id:ebi-a-GCST90002099 | MR Egger | 0.000899 | 1 | 0.976082 |
| ebi-a-GCST90002099 | finngen_R11_C3_OSTEOSARCOMA_EXALLC | Osteosarcoma (controls excluding all cancers) || id:finngen_R11_C3_OSTEOSARCOMA_EXALLC | CD4RA on Terminally Differentiated CD4+ T cell || id:ebi-a-GCST90002099 | Inverse variance weighted | 1.757748 | 2 | 0.41525 |
| ebi-a-GCST90002100 | finngen_R11_C3_OSTEOSARCOMA_EXALLC | Osteosarcoma (controls excluding all cancers) || id:finngen_R11_C3_OSTEOSARCOMA_EXALLC | CD45RA on naive CD8+ T cell || id:ebi-a-GCST90002100 | Inverse variance weighted | 2.153513 | 1 | 0.142244 |
| ebi-a-GCST90002102 | finngen_R11_C3_OSTEOSARCOMA_EXALLC | Osteosarcoma (controls excluding all cancers) || id:finngen_R11_C3_OSTEOSARCOMA_EXALLC | CD45RA on resting CD4 regulatory T cell || id:ebi-a-GCST90002102 | MR Egger | 3.163009 | 5 | 0.674871 |
| ebi-a-GCST90002102 | finngen_R11_C3_OSTEOSARCOMA_EXALLC | Osteosarcoma (controls excluding all cancers) || id:finngen_R11_C3_OSTEOSARCOMA_EXALLC | CD45RA on resting CD4 regulatory T cell || id:ebi-a-GCST90002102 | Inverse variance weighted | 5.46071 | 6 | 0.486218 |
| ebi-a-GCST90002104 | finngen_R11_C3_OSTEOSARCOMA_EXALLC | Osteosarcoma (controls excluding all cancers) || id:finngen_R11_C3_OSTEOSARCOMA_EXALLC | HLA DR on myeloid Dendritic Cell || id:ebi-a-GCST90002104 | MR Egger | 0.240991 | 4 | 0.993298 |
| ebi-a-GCST90002104 | finngen_R11_C3_OSTEOSARCOMA_EXALLC | Osteosarcoma (controls excluding all cancers) || id:finngen_R11_C3_OSTEOSARCOMA_EXALLC | HLA DR on myeloid Dendritic Cell || id:ebi-a-GCST90002104 | Inverse variance weighted | 0.628869 | 5 | 0.986643 |
| ebi-a-GCST90002105 | finngen_R11_C3_OSTEOSARCOMA_EXALLC | Osteosarcoma (controls excluding all cancers) || id:finngen_R11_C3_OSTEOSARCOMA_EXALLC | HLA DR on plasmacytoid Dendritic Cell || id:ebi-a-GCST90002105 | MR Egger | 0.83745 | 6 | 0.991032 |
| ebi-a-GCST90002105 | finngen_R11_C3_OSTEOSARCOMA_EXALLC | Osteosarcoma (controls excluding all cancers) || id:finngen_R11_C3_OSTEOSARCOMA_EXALLC | HLA DR on plasmacytoid Dendritic Cell || id:ebi-a-GCST90002105 | Inverse variance weighted | 0.868479 | 7 | 0.996681 |
| ebi-a-GCST90002106 | finngen_R11_C3_OSTEOSARCOMA_EXALLC | Osteosarcoma (controls excluding all cancers) || id:finngen_R11_C3_OSTEOSARCOMA_EXALLC | HLA DR on Dendritic Cell || id:ebi-a-GCST90002106 | MR Egger | 0.190494 | 5 | 0.999213 |
| ebi-a-GCST90002106 | finngen_R11_C3_OSTEOSARCOMA_EXALLC | Osteosarcoma (controls excluding all cancers) || id:finngen_R11_C3_OSTEOSARCOMA_EXALLC | HLA DR on Dendritic Cell || id:ebi-a-GCST90002106 | Inverse variance weighted | 0.286771 | 6 | 0.999559 |
| ebi-a-GCST90002108 | finngen_R11_C3_OSTEOSARCOMA_EXALLC | Osteosarcoma (controls excluding all cancers) || id:finngen_R11_C3_OSTEOSARCOMA_EXALLC | HLA DR on CD33+ HLA DR+ CD14- || id:ebi-a-GCST90002108 | MR Egger | 0.116762 | 1 | 0.732573 |
| ebi-a-GCST90002108 | finngen_R11_C3_OSTEOSARCOMA_EXALLC | Osteosarcoma (controls excluding all cancers) || id:finngen_R11_C3_OSTEOSARCOMA_EXALLC | HLA DR on CD33+ HLA DR+ CD14- || id:ebi-a-GCST90002108 | Inverse variance weighted | 0.117116 | 2 | 0.943123 |
| ebi-a-GCST90002109 | finngen_R11_C3_OSTEOSARCOMA_EXALLC | Osteosarcoma (controls excluding all cancers) || id:finngen_R11_C3_OSTEOSARCOMA_EXALLC | HLA DR on CD33+ HLA DR+ CD14dim || id:ebi-a-GCST90002109 | MR Egger | 0.110752 | 1 | 0.73929 |
| ebi-a-GCST90002109 | finngen_R11_C3_OSTEOSARCOMA_EXALLC | Osteosarcoma (controls excluding all cancers) || id:finngen_R11_C3_OSTEOSARCOMA_EXALLC | HLA DR on CD33+ HLA DR+ CD14dim || id:ebi-a-GCST90002109 | Inverse variance weighted | 0.132906 | 2 | 0.935707 |
| ebi-a-GCST90002110 | finngen_R11_C3_OSTEOSARCOMA_EXALLC | Osteosarcoma (controls excluding all cancers) || id:finngen_R11_C3_OSTEOSARCOMA_EXALLC | HLA DR on CD33dim HLA DR+ CD11b+ || id:ebi-a-GCST90002110 | MR Egger | 0.73665 | 2 | 0.691892 |
| ebi-a-GCST90002110 | finngen_R11_C3_OSTEOSARCOMA_EXALLC | Osteosarcoma (controls excluding all cancers) || id:finngen_R11_C3_OSTEOSARCOMA_EXALLC | HLA DR on CD33dim HLA DR+ CD11b+ || id:ebi-a-GCST90002110 | Inverse variance weighted | 1.189122 | 3 | 0.755615 |
| ebi-a-GCST90002111 | finngen_R11_C3_OSTEOSARCOMA_EXALLC | Osteosarcoma (controls excluding all cancers) || id:finngen_R11_C3_OSTEOSARCOMA_EXALLC | HLA DR on CD33dim HLA DR+ CD11b- || id:ebi-a-GCST90002111 | MR Egger | 1.208772 | 3 | 0.750901 |
| ebi-a-GCST90002111 | finngen_R11_C3_OSTEOSARCOMA_EXALLC | Osteosarcoma (controls excluding all cancers) || id:finngen_R11_C3_OSTEOSARCOMA_EXALLC | HLA DR on CD33dim HLA DR+ CD11b- || id:ebi-a-GCST90002111 | Inverse variance weighted | 1.253262 | 4 | 0.869254 |
| ebi-a-GCST90002112 | finngen_R11_C3_OSTEOSARCOMA_EXALLC | Osteosarcoma (controls excluding all cancers) || id:finngen_R11_C3_OSTEOSARCOMA_EXALLC | HLA DR on CD33- HLA DR+ || id:ebi-a-GCST90002112 | Inverse variance weighted | 0.050192 | 1 | 0.82273 |
| ebi-a-GCST90002116 | finngen_R11_C3_OSTEOSARCOMA_EXALLC | Osteosarcoma (controls excluding all cancers) || id:finngen_R11_C3_OSTEOSARCOMA_EXALLC | HLA DR on B cell || id:ebi-a-GCST90002116 | MR Egger | 8.017429 | 7 | 0.33106 |
| ebi-a-GCST90002116 | finngen_R11_C3_OSTEOSARCOMA_EXALLC | Osteosarcoma (controls excluding all cancers) || id:finngen_R11_C3_OSTEOSARCOMA_EXALLC | HLA DR on B cell || id:ebi-a-GCST90002116 | Inverse variance weighted | 10.09683 | 8 | 0.258296 |
| ebi-a-GCST90002117 | finngen_R11_C3_OSTEOSARCOMA_EXALLC | Osteosarcoma (controls excluding all cancers) || id:finngen_R11_C3_OSTEOSARCOMA_EXALLC | HLA DR on HLA DR+ Natural Killer || id:ebi-a-GCST90002117 | MR Egger | 0.566688 | 3 | 0.904014 |
| ebi-a-GCST90002117 | finngen_R11_C3_OSTEOSARCOMA_EXALLC | Osteosarcoma (controls excluding all cancers) || id:finngen_R11_C3_OSTEOSARCOMA_EXALLC | HLA DR on HLA DR+ Natural Killer || id:ebi-a-GCST90002117 | Inverse variance weighted | 0.593756 | 4 | 0.963755 |
| ebi-a-GCST90002118 | finngen_R11_C3_OSTEOSARCOMA_EXALLC | Osteosarcoma (controls excluding all cancers) || id:finngen_R11_C3_OSTEOSARCOMA_EXALLC | CD8 on CD28+ CD45RA- CD8+ T cell || id:ebi-a-GCST90002118 | Inverse variance weighted | 0.027756 | 1 | 0.867685 |
| ebi-a-GCST90002119 | finngen_R11_C3_OSTEOSARCOMA_EXALLC | Osteosarcoma (controls excluding all cancers) || id:finngen_R11_C3_OSTEOSARCOMA_EXALLC | CD8 on CD28+ CD45RA+ CD8+ T cell || id:ebi-a-GCST90002119 | MR Egger | 2.489751 | 6 | 0.869613 |
| ebi-a-GCST90002119 | finngen_R11_C3_OSTEOSARCOMA_EXALLC | Osteosarcoma (controls excluding all cancers) || id:finngen_R11_C3_OSTEOSARCOMA_EXALLC | CD8 on CD28+ CD45RA+ CD8+ T cell || id:ebi-a-GCST90002119 | Inverse variance weighted | 3.043288 | 7 | 0.880969 |
| ebi-a-GCST90002120 | finngen_R11_C3_OSTEOSARCOMA_EXALLC | Osteosarcoma (controls excluding all cancers) || id:finngen_R11_C3_OSTEOSARCOMA_EXALLC | CD8 on CD28- CD8+ T cell || id:ebi-a-GCST90002120 | Inverse variance weighted | 2.60E-07 | 1 | 0.999593 |
| ebi-a-GCST90002121 | finngen_R11_C3_OSTEOSARCOMA_EXALLC | Osteosarcoma (controls excluding all cancers) || id:finngen_R11_C3_OSTEOSARCOMA_EXALLC | CD8 on CD39+ CD8+ T cell || id:ebi-a-GCST90002121 | MR Egger | 0.98422 | 3 | 0.80507 |
| ebi-a-GCST90002121 | finngen_R11_C3_OSTEOSARCOMA_EXALLC | Osteosarcoma (controls excluding all cancers) || id:finngen_R11_C3_OSTEOSARCOMA_EXALLC | CD8 on CD39+ CD8+ T cell || id:ebi-a-GCST90002121 | Inverse variance weighted | 1.102679 | 4 | 0.893847 |

| ***TableS7. Results of a pleiotropy analysis of immune cell characteristics and osteosarcoma.*** | | | | | | |
| --- | --- | --- | --- | --- | --- | --- |
| id.exposure | id.outcome | outcome | exposure | egger_intercept | se | pval |
| ebi-a-GCST90001392 | finngen_R11_C3_OSTEOSARCOMA_EXALLC | Osteosarcoma (controls excluding all cancers) || id:finngen_R11_C3_OSTEOSARCOMA_EXALLC | IgD+ CD38+ B cell Absolute Count || id:ebi-a-GCST90001392 | | | |
| ebi-a-GCST90001395 | finngen_R11_C3_OSTEOSARCOMA_EXALLC | Osteosarcoma (controls excluding all cancers) || id:finngen_R11_C3_OSTEOSARCOMA_EXALLC | IgD+ CD38- B cell %B cell || id:ebi-a-GCST90001395 | | | |
| ebi-a-GCST90001398 | finngen_R11_C3_OSTEOSARCOMA_EXALLC | Osteosarcoma (controls excluding all cancers) || id:finngen_R11_C3_OSTEOSARCOMA_EXALLC | Unswitched memory B cell Absolute Count || id:ebi-a-GCST90001398 | | | |
| ebi-a-GCST90001399 | finngen_R11_C3_OSTEOSARCOMA_EXALLC | Osteosarcoma (controls excluding all cancers) || id:finngen_R11_C3_OSTEOSARCOMA_EXALLC | IgD- CD27- B cell %B cell || id:ebi-a-GCST90001399 | -0.12531 | 0.302733 | 0.750152 |
| ebi-a-GCST90001401 | finngen_R11_C3_OSTEOSARCOMA_EXALLC | Osteosarcoma (controls excluding all cancers) || id:finngen_R11_C3_OSTEOSARCOMA_EXALLC | IgD- CD27- B cell Absolute Count || id:ebi-a-GCST90001401 | | | |
| ebi-a-GCST90001406 | finngen_R11_C3_OSTEOSARCOMA_EXALLC | Osteosarcoma (controls excluding all cancers) || id:finngen_R11_C3_OSTEOSARCOMA_EXALLC | Memory B cell %B cell || id:ebi-a-GCST90001406 | | | |
| ebi-a-GCST90001417 | finngen_R11_C3_OSTEOSARCOMA_EXALLC | Osteosarcoma (controls excluding all cancers) || id:finngen_R11_C3_OSTEOSARCOMA_EXALLC | CD24+ CD27+ B cell %B cell || id:ebi-a-GCST90001417 | -1.84826 | 1.818005 | 0.494747 |
| ebi-a-GCST90001424 | finngen_R11_C3_OSTEOSARCOMA_EXALLC | Osteosarcoma (controls excluding all cancers) || id:finngen_R11_C3_OSTEOSARCOMA_EXALLC | IgD+ B cell %Lymphocyte || id:ebi-a-GCST90001424 | | | |
| ebi-a-GCST90001426 | finngen_R11_C3_OSTEOSARCOMA_EXALLC | Osteosarcoma (controls excluding all cancers) || id:finngen_R11_C3_OSTEOSARCOMA_EXALLC | IgD- CD38dim B cell %lymphocyte || id:ebi-a-GCST90001426 | | | |
| ebi-a-GCST90001431 | finngen_R11_C3_OSTEOSARCOMA_EXALLC | Osteosarcoma (controls excluding all cancers) || id:finngen_R11_C3_OSTEOSARCOMA_EXALLC | IgD+ CD38- B cell %lymphocyte || id:ebi-a-GCST90001431 | | | |
| ebi-a-GCST90001432 | finngen_R11_C3_OSTEOSARCOMA_EXALLC | Osteosarcoma (controls excluding all cancers) || id:finngen_R11_C3_OSTEOSARCOMA_EXALLC | Unswitched memory B cell %lymphocyte || id:ebi-a-GCST90001432 | -0.08084 | 0.364324 | 0.845 |
| ebi-a-GCST90001433 | finngen_R11_C3_OSTEOSARCOMA_EXALLC | Osteosarcoma (controls excluding all cancers) || id:finngen_R11_C3_OSTEOSARCOMA_EXALLC | IgD- CD27- B cell %lymphocyte || id:ebi-a-GCST90001433 | | | |
| ebi-a-GCST90001434 | finngen_R11_C3_OSTEOSARCOMA_EXALLC | Osteosarcoma (controls excluding all cancers) || id:finngen_R11_C3_OSTEOSARCOMA_EXALLC | Switched memory B cell %lymphocyte || id:ebi-a-GCST90001434 | -3.28145 | 4.65313 | 0.608978 |
| ebi-a-GCST90001436 | finngen_R11_C3_OSTEOSARCOMA_EXALLC | Osteosarcoma (controls excluding all cancers) || id:finngen_R11_C3_OSTEOSARCOMA_EXALLC | Memory B cell %lymphocyte || id:ebi-a-GCST90001436 | | | |
| ebi-a-GCST90001439 | finngen_R11_C3_OSTEOSARCOMA_EXALLC | Osteosarcoma (controls excluding all cancers) || id:finngen_R11_C3_OSTEOSARCOMA_EXALLC | IgD+ CD24+ B cell %lymphocyte || id:ebi-a-GCST90001439 | | | |
| ebi-a-GCST90001442 | finngen_R11_C3_OSTEOSARCOMA_EXALLC | Osteosarcoma (controls excluding all cancers) || id:finngen_R11_C3_OSTEOSARCOMA_EXALLC | CD24+ CD27+ B cell %lymphocyte || id:ebi-a-GCST90001442 | 0.301119 | 0.341894 | 0.540316 |
| ebi-a-GCST90001450 | finngen_R11_C3_OSTEOSARCOMA_EXALLC | Osteosarcoma (controls excluding all cancers) || id:finngen_R11_C3_OSTEOSARCOMA_EXALLC | CD62L- monocyte Absolute Count || id:ebi-a-GCST90001450 | -0.25463 | 0.511123 | 0.705761 |
| ebi-a-GCST90001451 | finngen_R11_C3_OSTEOSARCOMA_EXALLC | Osteosarcoma (controls excluding all cancers) || id:finngen_R11_C3_OSTEOSARCOMA_EXALLC | CD62L- monocyte %monocyte || id:ebi-a-GCST90001451 | 0.297428 | 0.700523 | 0.712456 |
| ebi-a-GCST90001458 | finngen_R11_C3_OSTEOSARCOMA_EXALLC | Osteosarcoma (controls excluding all cancers) || id:finngen_R11_C3_OSTEOSARCOMA_EXALLC | Myeloid Dendritic Cell Absolute Count || id:ebi-a-GCST90001458 | -0.20793 | 0.481245 | 0.740362 |
| ebi-a-GCST90001459 | finngen_R11_C3_OSTEOSARCOMA_EXALLC | Osteosarcoma (controls excluding all cancers) || id:finngen_R11_C3_OSTEOSARCOMA_EXALLC | Myeloid Dendritic Cell %Dendritic Cell || id:ebi-a-GCST90001459 | | | |
| ebi-a-GCST90001460 | finngen_R11_C3_OSTEOSARCOMA_EXALLC | Osteosarcoma (controls excluding all cancers) || id:finngen_R11_C3_OSTEOSARCOMA_EXALLC | Plasmacytoid Dendritic Cell Absolute Count || id:ebi-a-GCST90001460 | | | |
| ebi-a-GCST90001461 | finngen_R11_C3_OSTEOSARCOMA_EXALLC | Osteosarcoma (controls excluding all cancers) || id:finngen_R11_C3_OSTEOSARCOMA_EXALLC | Dendritic Cell Absolute Count || id:ebi-a-GCST90001461 | -0.17255 | 0.468575 | 0.775374 |
| ebi-a-GCST90001462 | finngen_R11_C3_OSTEOSARCOMA_EXALLC | Osteosarcoma (controls excluding all cancers) || id:finngen_R11_C3_OSTEOSARCOMA_EXALLC | CD62L- Dendritic Cell Absolute Count || id:ebi-a-GCST90001462 | -0.05 | 0.454549 | 0.919361 |
| ebi-a-GCST90001463 | finngen_R11_C3_OSTEOSARCOMA_EXALLC | Osteosarcoma (controls excluding all cancers) || id:finngen_R11_C3_OSTEOSARCOMA_EXALLC | CD62L- Dendritic Cell %Dendritic Cell || id:ebi-a-GCST90001463 | -0.31563 | 0.209987 | 0.271685 |
| ebi-a-GCST90001464 | finngen_R11_C3_OSTEOSARCOMA_EXALLC | Osteosarcoma (controls excluding all cancers) || id:finngen_R11_C3_OSTEOSARCOMA_EXALLC | CD86+ myeloid Dendritic Cell Absolute Count || id:ebi-a-GCST90001464 | -0.05116 | 0.424018 | 0.911598 |
| ebi-a-GCST90001465 | finngen_R11_C3_OSTEOSARCOMA_EXALLC | Osteosarcoma (controls excluding all cancers) || id:finngen_R11_C3_OSTEOSARCOMA_EXALLC | CD86+ myeloid Dendritic Cell %Dendritic Cell || id:ebi-a-GCST90001465 | -0.06182 | 0.408413 | 0.893568 |
| ebi-a-GCST90001468 | finngen_R11_C3_OSTEOSARCOMA_EXALLC | Osteosarcoma (controls excluding all cancers) || id:finngen_R11_C3_OSTEOSARCOMA_EXALLC | CD62L- myeloid Dendritic Cell Absolute Count || id:ebi-a-GCST90001468 | -0.06397 | 0.438523 | 0.891076 |
| ebi-a-GCST90001469 | finngen_R11_C3_OSTEOSARCOMA_EXALLC | Osteosarcoma (controls excluding all cancers) || id:finngen_R11_C3_OSTEOSARCOMA_EXALLC | CD62L- myeloid Dendritic Cell %Dendritic Cell || id:ebi-a-GCST90001469 | -0.0727 | 0.429186 | 0.873712 |
| ebi-a-GCST90001471 | finngen_R11_C3_OSTEOSARCOMA_EXALLC | Osteosarcoma (controls excluding all cancers) || id:finngen_R11_C3_OSTEOSARCOMA_EXALLC | CD62L- plasmacytoid Dendritic Cell %Dendritic Cell || id:ebi-a-GCST90001471 | | | |
| ebi-a-GCST90001472 | finngen_R11_C3_OSTEOSARCOMA_EXALLC | Osteosarcoma (controls excluding all cancers) || id:finngen_R11_C3_OSTEOSARCOMA_EXALLC | CD62L- CD86+ myeloid Dendritic Cell Absolute Count || id:ebi-a-GCST90001472 | -0.0638 | 0.426637 | 0.890608 |
| ebi-a-GCST90001473 | finngen_R11_C3_OSTEOSARCOMA_EXALLC | Osteosarcoma (controls excluding all cancers) || id:finngen_R11_C3_OSTEOSARCOMA_EXALLC | CD62L- CD86+ myeloid Dendritic Cell %Dendritic Cell || id:ebi-a-GCST90001473 | -0.06869 | 0.416172 | 0.879399 |
| ebi-a-GCST90001474 | finngen_R11_C3_OSTEOSARCOMA_EXALLC | Osteosarcoma (controls excluding all cancers) || id:finngen_R11_C3_OSTEOSARCOMA_EXALLC | Plasmacytoid Dendritic Cell %Dendritic Cell || id:ebi-a-GCST90001474 | | | |
| ebi-a-GCST90001475 | finngen_R11_C3_OSTEOSARCOMA_EXALLC | Osteosarcoma (controls excluding all cancers) || id:finngen_R11_C3_OSTEOSARCOMA_EXALLC | HLA DR++ monocyte %monocyte || id:ebi-a-GCST90001475 | 0.114035 | 0.556372 | 0.856569 |
| ebi-a-GCST90001476 | finngen_R11_C3_OSTEOSARCOMA_EXALLC | Osteosarcoma (controls excluding all cancers) || id:finngen_R11_C3_OSTEOSARCOMA_EXALLC | HLA DR++ monocyte %leukocyte || id:ebi-a-GCST90001476 | | | |
| ebi-a-GCST90001478 | finngen_R11_C3_OSTEOSARCOMA_EXALLC | Osteosarcoma (controls excluding all cancers) || id:finngen_R11_C3_OSTEOSARCOMA_EXALLC | CD4 regulatory T cell %CD4+ T cell || id:ebi-a-GCST90001478 | | | |
| ebi-a-GCST90001480 | finngen_R11_C3_OSTEOSARCOMA_EXALLC | Osteosarcoma (controls excluding all cancers) || id:finngen_R11_C3_OSTEOSARCOMA_EXALLC | Resting CD4 regulatory T cell Absolute Count || id:ebi-a-GCST90001480 | -0.09883 | 0.26534 | 0.74532 |
| ebi-a-GCST90001481 | finngen_R11_C3_OSTEOSARCOMA_EXALLC | Osteosarcoma (controls excluding all cancers) || id:finngen_R11_C3_OSTEOSARCOMA_EXALLC | Resting CD4 regulatory T cell %CD4 regulatory T cell || id:ebi-a-GCST90001481 | -0.02183 | 0.199962 | 0.91546 |
| ebi-a-GCST90001482 | finngen_R11_C3_OSTEOSARCOMA_EXALLC | Osteosarcoma (controls excluding all cancers) || id:finngen_R11_C3_OSTEOSARCOMA_EXALLC | Resting CD4 regulatory T cell %CD4+ T cell || id:ebi-a-GCST90001482 | -0.24655 | 0.236388 | 0.355834 |
| ebi-a-GCST90001483 | finngen_R11_C3_OSTEOSARCOMA_EXALLC | Osteosarcoma (controls excluding all cancers) || id:finngen_R11_C3_OSTEOSARCOMA_EXALLC | CD39+ resting CD4 regulatory T cell Absolute Count || id:ebi-a-GCST90001483 | -0.06536 | 0.118476 | 0.596246 |
| ebi-a-GCST90001484 | finngen_R11_C3_OSTEOSARCOMA_EXALLC | Osteosarcoma (controls excluding all cancers) || id:finngen_R11_C3_OSTEOSARCOMA_EXALLC | CD39+ resting CD4 regulatory T cell %resting CD4 regulatory T cell || id:ebi-a-GCST90001484 | 0.014882 | 0.1868 | 0.93959 |
| ebi-a-GCST90001485 | finngen_R11_C3_OSTEOSARCOMA_EXALLC | Osteosarcoma (controls excluding all cancers) || id:finngen_R11_C3_OSTEOSARCOMA_EXALLC | CD39+ resting CD4 regulatory T cell %CD4 regulatory T cell || id:ebi-a-GCST90001485 | -0.10292 | 0.111516 | 0.37587 |
| ebi-a-GCST90001486 | finngen_R11_C3_OSTEOSARCOMA_EXALLC | Osteosarcoma (controls excluding all cancers) || id:finngen_R11_C3_OSTEOSARCOMA_EXALLC | Activated CD4 regulatory T cell Absolute Count || id:ebi-a-GCST90001486 | | | |
| ebi-a-GCST90001487 | finngen_R11_C3_OSTEOSARCOMA_EXALLC | Osteosarcoma (controls excluding all cancers) || id:finngen_R11_C3_OSTEOSARCOMA_EXALLC | Activated CD4 regulatory T cell %CD4 regulatory T cell || id:ebi-a-GCST90001487 | -1.18801 | 0.595005 | 0.183962 |
| ebi-a-GCST90001489 | finngen_R11_C3_OSTEOSARCOMA_EXALLC | Osteosarcoma (controls excluding all cancers) || id:finngen_R11_C3_OSTEOSARCOMA_EXALLC | CD39+ activated CD4 regulatory T cell Absolute Count || id:ebi-a-GCST90001489 | -0.14498 | 0.385491 | 0.742998 |
| ebi-a-GCST90001491 | finngen_R11_C3_OSTEOSARCOMA_EXALLC | Osteosarcoma (controls excluding all cancers) || id:finngen_R11_C3_OSTEOSARCOMA_EXALLC | CD39+ activated CD4 regulatory T cell %CD4 regulatory T cell || id:ebi-a-GCST90001491 | 0.091757 | 0.149323 | 0.572126 |
| ebi-a-GCST90001492 | finngen_R11_C3_OSTEOSARCOMA_EXALLC | Osteosarcoma (controls excluding all cancers) || id:finngen_R11_C3_OSTEOSARCOMA_EXALLC | Secreting CD4 regulatory T cell Absolute Count || id:ebi-a-GCST90001492 | 0.659724 | 0.571614 | 0.367728 |
| ebi-a-GCST90001493 | finngen_R11_C3_OSTEOSARCOMA_EXALLC | Osteosarcoma (controls excluding all cancers) || id:finngen_R11_C3_OSTEOSARCOMA_EXALLC | Secreting CD4 regulatory T cell %CD4 regulatory T cell || id:ebi-a-GCST90001493 | 0.159493 | 0.173527 | 0.41004 |
| ebi-a-GCST90001494 | finngen_R11_C3_OSTEOSARCOMA_EXALLC | Osteosarcoma (controls excluding all cancers) || id:finngen_R11_C3_OSTEOSARCOMA_EXALLC | Secreting CD4 regulatory T cell %CD4+ T cell || id:ebi-a-GCST90001494 | 0.224454 | 0.177919 | 0.262762 |
| ebi-a-GCST90001495 | finngen_R11_C3_OSTEOSARCOMA_EXALLC | Osteosarcoma (controls excluding all cancers) || id:finngen_R11_C3_OSTEOSARCOMA_EXALLC | CD39+ secreting CD4 regulatory T cell Absolute Count || id:ebi-a-GCST90001495 | 0.047288 | 0.158132 | 0.784428 |
| ebi-a-GCST90001496 | finngen_R11_C3_OSTEOSARCOMA_EXALLC | Osteosarcoma (controls excluding all cancers) || id:finngen_R11_C3_OSTEOSARCOMA_EXALLC | CD39+ secreting CD4 regulatory T cell %secreting CD4 regulatory T cell || id:ebi-a-GCST90001496 | 0.093286 | 0.277182 | 0.75012 |
| ebi-a-GCST90001497 | finngen_R11_C3_OSTEOSARCOMA_EXALLC | Osteosarcoma (controls excluding all cancers) || id:finngen_R11_C3_OSTEOSARCOMA_EXALLC | CD39+ secreting CD4 regulatory T cell %CD4 regulatory T cell || id:ebi-a-GCST90001497 | 0.092866 | 0.1454 | 0.551127 |
| ebi-a-GCST90001499 | finngen_R11_C3_OSTEOSARCOMA_EXALLC | Osteosarcoma (controls excluding all cancers) || id:finngen_R11_C3_OSTEOSARCOMA_EXALLC | Activated & resting CD4 regulatory T cell %CD4 regulatory T cell || id:ebi-a-GCST90001499 | -0.15734 | 0.172514 | 0.413343 |
| ebi-a-GCST90001500 | finngen_R11_C3_OSTEOSARCOMA_EXALLC | Osteosarcoma (controls excluding all cancers) || id:finngen_R11_C3_OSTEOSARCOMA_EXALLC | Activated & resting CD4 regulatory T cell %CD4+ T cell || id:ebi-a-GCST90001500 | -0.29991 | 0.198792 | 0.372646 |
| ebi-a-GCST90001501 | finngen_R11_C3_OSTEOSARCOMA_EXALLC | Osteosarcoma (controls excluding all cancers) || id:finngen_R11_C3_OSTEOSARCOMA_EXALLC | Activated & secreting CD4 regulatory T cell Absolute Count || id:ebi-a-GCST90001501 | 0.618106 | 0.560439 | 0.385034 |
| ebi-a-GCST90001502 | finngen_R11_C3_OSTEOSARCOMA_EXALLC | Osteosarcoma (controls excluding all cancers) || id:finngen_R11_C3_OSTEOSARCOMA_EXALLC | Activated & secreting CD4 regulatory T cell %CD4 regulatory T cell || id:ebi-a-GCST90001502 | 0.067572 | 0.166244 | 0.696542 |
| ebi-a-GCST90001503 | finngen_R11_C3_OSTEOSARCOMA_EXALLC | Osteosarcoma (controls excluding all cancers) || id:finngen_R11_C3_OSTEOSARCOMA_EXALLC | Activated & secreting CD4 regulatory T cell %CD4+ T cell || id:ebi-a-GCST90001503 | 0.020375 | 0.158354 | 0.901238 |
| ebi-a-GCST90001505 | finngen_R11_C3_OSTEOSARCOMA_EXALLC | Osteosarcoma (controls excluding all cancers) || id:finngen_R11_C3_OSTEOSARCOMA_EXALLC | CD25++ CD4+ T cell %CD4+ T cell || id:ebi-a-GCST90001505 | | | |
| ebi-a-GCST90001507 | finngen_R11_C3_OSTEOSARCOMA_EXALLC | Osteosarcoma (controls excluding all cancers) || id:finngen_R11_C3_OSTEOSARCOMA_EXALLC | CD25++ CD45RA+ CD4 not regulatory T cell Absolute Count || id:ebi-a-GCST90001507 | -0.52598 | 0.210272 | 0.242112 |
| ebi-a-GCST90001508 | finngen_R11_C3_OSTEOSARCOMA_EXALLC | Osteosarcoma (controls excluding all cancers) || id:finngen_R11_C3_OSTEOSARCOMA_EXALLC | CD25++ CD45RA+ CD4 not regulatory T cell %CD4+ T cell || id:ebi-a-GCST90001508 | -0.26069 | 0.220397 | 0.32208 |
| ebi-a-GCST90001509 | finngen_R11_C3_OSTEOSARCOMA_EXALLC | Osteosarcoma (controls excluding all cancers) || id:finngen_R11_C3_OSTEOSARCOMA_EXALLC | CD25++ CD45RA+ CD4 not regulatory T cell %T cell || id:ebi-a-GCST90001509 | -0.25623 | 0.212505 | 0.31433 |
| ebi-a-GCST90001510 | finngen_R11_C3_OSTEOSARCOMA_EXALLC | Osteosarcoma (controls excluding all cancers) || id:finngen_R11_C3_OSTEOSARCOMA_EXALLC | CD25++ CD45RA- CD4 not regulatory T cell Absolute Count || id:ebi-a-GCST90001510 | | | |
| ebi-a-GCST90001511 | finngen_R11_C3_OSTEOSARCOMA_EXALLC | Osteosarcoma (controls excluding all cancers) || id:finngen_R11_C3_OSTEOSARCOMA_EXALLC | CD25++ CD45RA- CD4 not regulatory T cell %CD4+ T cell || id:ebi-a-GCST90001511 | 0.774759 | 0.748171 | 0.488886 |
| ebi-a-GCST90001512 | finngen_R11_C3_OSTEOSARCOMA_EXALLC | Osteosarcoma (controls excluding all cancers) || id:finngen_R11_C3_OSTEOSARCOMA_EXALLC | CD25++ CD45RA- CD4 not regulatory T cell %T cell || id:ebi-a-GCST90001512 | 1.426041 | 0.954946 | 0.375647 |
| ebi-a-GCST90001514 | finngen_R11_C3_OSTEOSARCOMA_EXALLC | Osteosarcoma (controls excluding all cancers) || id:finngen_R11_C3_OSTEOSARCOMA_EXALLC | Hematopoietic Stem Cell Absolute Count || id:ebi-a-GCST90001514 | | | |
| ebi-a-GCST90001515 | finngen_R11_C3_OSTEOSARCOMA_EXALLC | Osteosarcoma (controls excluding all cancers) || id:finngen_R11_C3_OSTEOSARCOMA_EXALLC | Immature Myeloid-Derived Suppressor Cells Absolute Count || id:ebi-a-GCST90001515 | | | |
| ebi-a-GCST90001516 | finngen_R11_C3_OSTEOSARCOMA_EXALLC | Osteosarcoma (controls excluding all cancers) || id:finngen_R11_C3_OSTEOSARCOMA_EXALLC | Immature Myeloid-Derived Suppressor Cells %CD33dim HLA DR- CD66b- || id:ebi-a-GCST90001516 | | | |
| ebi-a-GCST90001520 | finngen_R11_C3_OSTEOSARCOMA_EXALLC | Osteosarcoma (controls excluding all cancers) || id:finngen_R11_C3_OSTEOSARCOMA_EXALLC | CD33+ HLA DR+ CD14dim Absolute Count || id:ebi-a-GCST90001520 | | | |
| ebi-a-GCST90001524 | finngen_R11_C3_OSTEOSARCOMA_EXALLC | Osteosarcoma (controls excluding all cancers) || id:finngen_R11_C3_OSTEOSARCOMA_EXALLC | Granulocytic Myeloid-Derived Suppressor Cells Absolute Count || id:ebi-a-GCST90001524 | | | |
| ebi-a-GCST90001526 | finngen_R11_C3_OSTEOSARCOMA_EXALLC | Osteosarcoma (controls excluding all cancers) || id:finngen_R11_C3_OSTEOSARCOMA_EXALLC | CD33dim HLA DR+ CD11b+ %CD33dim HLA DR+ || id:ebi-a-GCST90001526 | -1.32273 | 0.647162 | 0.289675 |
| ebi-a-GCST90001527 | finngen_R11_C3_OSTEOSARCOMA_EXALLC | Osteosarcoma (controls excluding all cancers) || id:finngen_R11_C3_OSTEOSARCOMA_EXALLC | CD33dim HLA DR+ CD11b- Absolute Count || id:ebi-a-GCST90001527 | | | |
| ebi-a-GCST90001528 | finngen_R11_C3_OSTEOSARCOMA_EXALLC | Osteosarcoma (controls excluding all cancers) || id:finngen_R11_C3_OSTEOSARCOMA_EXALLC | CD33dim HLA DR+ CD11b- %CD33dim HLA DR+ || id:ebi-a-GCST90001528 | 1.26703 | 0.621239 | 0.290214 |
| ebi-a-GCST90001530 | finngen_R11_C3_OSTEOSARCOMA_EXALLC | Osteosarcoma (controls excluding all cancers) || id:finngen_R11_C3_OSTEOSARCOMA_EXALLC | Monocytic Myeloid-Derived Suppressor Cells Absolute Count || id:ebi-a-GCST90001530 | 0.208126 | 0.610065 | 0.755484 |
| ebi-a-GCST90001531 | finngen_R11_C3_OSTEOSARCOMA_EXALLC | Osteosarcoma (controls excluding all cancers) || id:finngen_R11_C3_OSTEOSARCOMA_EXALLC | CD33dim HLA DR- Absolute Count || id:ebi-a-GCST90001531 | -0.07367 | 0.279393 | 0.835878 |
| ebi-a-GCST90001532 | finngen_R11_C3_OSTEOSARCOMA_EXALLC | Osteosarcoma (controls excluding all cancers) || id:finngen_R11_C3_OSTEOSARCOMA_EXALLC | Basophil Absolute Count || id:ebi-a-GCST90001532 | -0.06091 | 0.295103 | 0.870416 |
| ebi-a-GCST90001533 | finngen_R11_C3_OSTEOSARCOMA_EXALLC | Osteosarcoma (controls excluding all cancers) || id:finngen_R11_C3_OSTEOSARCOMA_EXALLC | Basophil %CD33dim HLA DR- CD66b- || id:ebi-a-GCST90001533 | -0.08747 | 0.728878 | 0.923963 |
| ebi-a-GCST90001534 | finngen_R11_C3_OSTEOSARCOMA_EXALLC | Osteosarcoma (controls excluding all cancers) || id:finngen_R11_C3_OSTEOSARCOMA_EXALLC | CD45RA- CD4+ T cell Absolute Count || id:ebi-a-GCST90001534 | | | |
| ebi-a-GCST90001535 | finngen_R11_C3_OSTEOSARCOMA_EXALLC | Osteosarcoma (controls excluding all cancers) || id:finngen_R11_C3_OSTEOSARCOMA_EXALLC | CD45RA- CD4+ T cell %CD4+ T cell || id:ebi-a-GCST90001535 | 0.338435 | 0.17337 | 0.190181 |
| ebi-a-GCST90001536 | finngen_R11_C3_OSTEOSARCOMA_EXALLC | Osteosarcoma (controls excluding all cancers) || id:finngen_R11_C3_OSTEOSARCOMA_EXALLC | CD45RA- CD4+ T cell %T cell || id:ebi-a-GCST90001536 | | | |
| ebi-a-GCST90001540 | finngen_R11_C3_OSTEOSARCOMA_EXALLC | Osteosarcoma (controls excluding all cancers) || id:finngen_R11_C3_OSTEOSARCOMA_EXALLC | Naive CD4+ T cell Absolute Count || id:ebi-a-GCST90001540 | | | |
| ebi-a-GCST90001541 | finngen_R11_C3_OSTEOSARCOMA_EXALLC | Osteosarcoma (controls excluding all cancers) || id:finngen_R11_C3_OSTEOSARCOMA_EXALLC | Naive CD4+ T cell %CD4+ T cell || id:ebi-a-GCST90001541 | -0.28684 | 0.253137 | 0.374711 |
| ebi-a-GCST90001543 | finngen_R11_C3_OSTEOSARCOMA_EXALLC | Osteosarcoma (controls excluding all cancers) || id:finngen_R11_C3_OSTEOSARCOMA_EXALLC | Effector Memory CD4+ T cell %CD4+ T cell || id:ebi-a-GCST90001543 | 0.03241 | 0.239364 | 0.914322 |
| ebi-a-GCST90001544 | finngen_R11_C3_OSTEOSARCOMA_EXALLC | Osteosarcoma (controls excluding all cancers) || id:finngen_R11_C3_OSTEOSARCOMA_EXALLC | Effector Memory CD4+ T cell %T cell || id:ebi-a-GCST90001544 | 0.047803 | 0.248033 | 0.86497 |
| ebi-a-GCST90001545 | finngen_R11_C3_OSTEOSARCOMA_EXALLC | Osteosarcoma (controls excluding all cancers) || id:finngen_R11_C3_OSTEOSARCOMA_EXALLC | Terminally Differentiated CD4+ T cell Absolute Count || id:ebi-a-GCST90001545 | | | |
| ebi-a-GCST90001546 | finngen_R11_C3_OSTEOSARCOMA_EXALLC | Osteosarcoma (controls excluding all cancers) || id:finngen_R11_C3_OSTEOSARCOMA_EXALLC | Terminally Differentiated CD4+ T cell %CD4+ T cell || id:ebi-a-GCST90001546 | -0.46738 | 0.375285 | 0.301397 |
| ebi-a-GCST90001547 | finngen_R11_C3_OSTEOSARCOMA_EXALLC | Osteosarcoma (controls excluding all cancers) || id:finngen_R11_C3_OSTEOSARCOMA_EXALLC | Terminally Differentiated CD4+ T cell %T cell || id:ebi-a-GCST90001547 | -0.20724 | 0.206811 | 0.373011 |
| ebi-a-GCST90001553 | finngen_R11_C3_OSTEOSARCOMA_EXALLC | Osteosarcoma (controls excluding all cancers) || id:finngen_R11_C3_OSTEOSARCOMA_EXALLC | Naive CD8+ T cell %T cell || id:ebi-a-GCST90001553 | -0.11466 | 0.228529 | 0.703952 |
| ebi-a-GCST90001554 | finngen_R11_C3_OSTEOSARCOMA_EXALLC | Osteosarcoma (controls excluding all cancers) || id:finngen_R11_C3_OSTEOSARCOMA_EXALLC | Effector Memory CD8+ T cell Absolute Count || id:ebi-a-GCST90001554 | | | |
| ebi-a-GCST90001555 | finngen_R11_C3_OSTEOSARCOMA_EXALLC | Osteosarcoma (controls excluding all cancers) || id:finngen_R11_C3_OSTEOSARCOMA_EXALLC | Effector Memory CD8+ T cell %CD8+ T cell || id:ebi-a-GCST90001555 | 0.038965 | 0.175505 | 0.84491 |
| ebi-a-GCST90001556 | finngen_R11_C3_OSTEOSARCOMA_EXALLC | Osteosarcoma (controls excluding all cancers) || id:finngen_R11_C3_OSTEOSARCOMA_EXALLC | Effector Memory CD8+ T cell %T cell || id:ebi-a-GCST90001556 | | | |
| ebi-a-GCST90001558 | finngen_R11_C3_OSTEOSARCOMA_EXALLC | Osteosarcoma (controls excluding all cancers) || id:finngen_R11_C3_OSTEOSARCOMA_EXALLC | Terminally Differentiated CD8+ T cell %CD8+ T cell || id:ebi-a-GCST90001558 | -0.54135 | 0.37401 | 0.384891 |
| ebi-a-GCST90001559 | finngen_R11_C3_OSTEOSARCOMA_EXALLC | Osteosarcoma (controls excluding all cancers) || id:finngen_R11_C3_OSTEOSARCOMA_EXALLC | Terminally Differentiated CD8+ T cell %T cell || id:ebi-a-GCST90001559 | | | |
| ebi-a-GCST90001560 | finngen_R11_C3_OSTEOSARCOMA_EXALLC | Osteosarcoma (controls excluding all cancers) || id:finngen_R11_C3_OSTEOSARCOMA_EXALLC | CD45RA+ CD8+ T cell Absolute Count || id:ebi-a-GCST90001560 | -0.12097 | 1.900854 | 0.959542 |
| ebi-a-GCST90001561 | finngen_R11_C3_OSTEOSARCOMA_EXALLC | Osteosarcoma (controls excluding all cancers) || id:finngen_R11_C3_OSTEOSARCOMA_EXALLC | CD45RA+ CD8+ T cell %CD8+ T cell || id:ebi-a-GCST90001561 | -0.00021 | 0.153833 | 0.99902 |
| ebi-a-GCST90001562 | finngen_R11_C3_OSTEOSARCOMA_EXALLC | Osteosarcoma (controls excluding all cancers) || id:finngen_R11_C3_OSTEOSARCOMA_EXALLC | CD45RA+ CD8+ T cell %T cell || id:ebi-a-GCST90001562 | -0.0262 | 0.309643 | 0.946269 |
[truncated: 129,922 more chars]
